# Supplementary material
Source: Royal Society of Chemistry journal article supplement (doi:10.1039/d6an00215c)
Supplement: d6an00215c1.xlsx [file d6an00215c1.xlsx]

## Sheet: Processing Parameters
PLGS Processing Parameters
Chromatographic peak width	0.5
MS TOF resolution	Automatic
Lock mass	785.84265Da/e
Lock mass window	.25Da
Low energy threshold	135.0 Counts
Elevated energy threshold	30.0 Counts
Eltion start time	N/Ap
Elution end time	N/Ap
Intesnsity threshold	100.0 Counts
PLGS Workflow Parameters
Search engine type	PLGS
Peptide tolerance	Automatic
Fragment tolerance	Automatic
Min fragment ion matches per peptide	1
Min fragment ion matches per protein	2
Min peptide matches per protein	1
Maximum hits to return	20
Maximum protein mass	500000
Primary digest reagent	Non-specific
Secondary digest reagent	None
Missed cleavages	3
Fixed modifier reagents	N/Ap
Fixed modifier reagent groups	N/Ap
Variable modifier reagents	Acetyl N-Term, Deamindation N, Oxidation M
Variable modifier reagent groups	N/Ap
Enriched variable modification	N/Ap
Variable glycosylation modifications	N/Ap
False discovery rate	4
Calibration protein	N/Ap
Calibration protein concentration	N/Ap
Manual response factor	N/Ap
Monoisotopic or average	Monoisotopic
Peptide charge	1+
Instrument type	ESI-QUAD-TOF
DynamX Peptide Thresholds
Minimum intensity	0
Minimum sequence length	0
Maximum sequence length	0
Minimum products	0
Minimum products per amino acid	0.2
Minimum consecutive products	0
Minimum sum intensity for products	0
Minimum score	6
Maximum MH+ error (ppm)	0
DynamX Replication
File threshold	0
Retention time RSD	0
Intensity RSD	0

## Sheet: PTx-629E1 Difference
Pertussis Toxin bound to mAb 629E1 - Epitope Screening - 03Apr2023
Protein	Start	End	Sequence	MHP	RT	State	Exposure	Uptake	Uptake SD	Summed Uptake	Difference in Summed Uptake	3*maxSD		Total Sequence Coverage:	87.82
PTx-S1	1	7	DDPPATV	714.331	5.27074	PTx	0	0	0					S1 Sequence Coverage:	92.3	S1 Sequence Redundancy	4.88
PTx-S1	1	7	DDPPATV	714.331	5.31112	PTx	10	0.954087	0.067178					S2 Sequence Coverage:	93	S2 Sequence Redundancy	3.35
PTx-S1	1	7	DDPPATV	714.331	5.27384	PTx	30	1.03916	0.101078	1.99324				S3 Sequence Coverage:	80.9	S3 Sequence Redundancy	7.64
PTx-S1	1	7	DDPPATV	714.331	5.27074	PTx-E6290	0	0	0					S4 Sequence Coverage:	100	S4 Sequence Redundancy	7.94
PTx-S1	1	7	DDPPATV	714.331	5.29705	PTx-E6290	10	1.13161	0.074009					S5 Sequence Coverage:	72.9	S5 Sequence Redundancy	4.35
PTx-S1	1	7	DDPPATV	714.331	5.27365	PTx-E6290	30	0.875293	0.217946	2.0069	-0.01366	0.653838
PTx-S1	1	8	DDPPATVY	877.394	6.30302	PTx	0	0	0
PTx-S1	1	8	DDPPATVY	877.394	6.34431	PTx	10	0.910195	0.026663
PTx-S1	1	8	DDPPATVY	877.394	6.30649	PTx	30	0.95948	0.020534	1.86967
PTx-S1	1	8	DDPPATVY	877.394	6.30302	PTx-E6290	0	0	0
PTx-S1	1	8	DDPPATVY	877.394	6.32592	PTx-E6290	10	0.88867	0.043874
PTx-S1	1	8	DDPPATVY	877.394	6.30649	PTx-E6290	30	0.875776	0.077657	1.76445	0.105229	0.232971
PTx-S1	3	10	PPATVYKY	938.498	4.76316	PTx	0	0	0
PTx-S1	3	10	PPATVYKY	938.498	4.73244	PTx	10	0.843103	0.338825
PTx-S1	3	10	PPATVYKY	938.498	4.70244	PTx	30	0.516248	0.019369	1.35935
PTx-S1	3	10	PPATVYKY	938.498	4.76316	PTx-E6290	0	0	0
PTx-S1	3	10	PPATVYKY	938.498	4.71521	PTx-E6290	10	0.533701	0.028448
PTx-S1	3	10	PPATVYKY	938.498	4.70183	PTx-E6290	30	0.45131	0.046005	0.985011	0.37434	1.01648
PTx-S1	10	17	YDSRPPED	978.416	4.50171	PTx	0	0	0
PTx-S1	10	17	YDSRPPED	978.416	4.54184	PTx	10	0.605902	0.176142
PTx-S1	10	17	YDSRPPED	978.416	4.51496	PTx	30	0.622998	0.154443	1.2289
PTx-S1	10	17	YDSRPPED	978.416	4.50171	PTx-E6290	0	0	0
PTx-S1	10	17	YDSRPPED	978.416	4.52921	PTx-E6290	10	0.504436	0.14214
PTx-S1	10	17	YDSRPPED	978.416	4.51391	PTx-E6290	30	0.507669	0.152132	1.01211	0.216795	0.528426
PTx-S1	18	33	VFQNGFTAWGNNDNVL	1795.84	8.13181	PTx	0	0	0
PTx-S1	18	33	VFQNGFTAWGNNDNVL	1795.84	8.16634	PTx	10	2.91676	0.194527
PTx-S1	18	33	VFQNGFTAWGNNDNVL	1795.84	8.13453	PTx	30	3.60477	0.084643	6.52154
PTx-S1	18	33	VFQNGFTAWGNNDNVL	1795.84	8.13181	PTx-E6290	0	0	0
PTx-S1	18	33	VFQNGFTAWGNNDNVL	1795.84	8.15931	PTx-E6290	10	2.79487	0.174542
PTx-S1	18	33	VFQNGFTAWGNNDNVL	1795.84	8.13208	PTx-E6290	30	2.92597	0.224493	5.72084	0.80069	0.673479
PTx-S1	21	30	NGFTAWGNND	1095.45	7.12183	PTx	0	0	0
PTx-S1	21	30	NGFTAWGNND	1095.45	7.16017	PTx	10	1.66054	0.070493
PTx-S1	21	30	NGFTAWGNND	1095.45	7.12827	PTx	30	2.01025	0.036921	3.6708
PTx-S1	21	30	NGFTAWGNND	1095.45	7.12183	PTx-E6290	0	0	0
PTx-S1	21	30	NGFTAWGNND	1095.45	7.14742	PTx-E6290	10	1.67875	0.100471
PTx-S1	21	30	NGFTAWGNND	1095.45	7.12711	PTx-E6290	30	1.6924	0.152852	3.37116	0.299639	0.458556
PTx-S1	21	33	NGFTAWGNNDNVL	1421.64	7.85854	PTx	0	0	0
PTx-S1	21	33	NGFTAWGNNDNVL	1421.64	7.90086	PTx	10	2.37491	0.098726
PTx-S1	21	33	NGFTAWGNNDNVL	1421.64	7.86346	PTx	30	2.85746	0.04555	5.23237
PTx-S1	21	33	NGFTAWGNNDNVL	1421.64	7.85854	PTx-E6290	0	0	0
PTx-S1	21	33	NGFTAWGNNDNVL	1421.64	7.89049	PTx-E6290	10	2.15593	0.06312
PTx-S1	21	33	NGFTAWGNNDNVL	1421.64	7.86087	PTx-E6290	30	2.57314	0.143459	4.72907	0.50331	0.430377
PTx-S1	24	30	TAWGNND	777.316	5.67916	PTx	0	0	0
PTx-S1	24	30	TAWGNND	777.316	5.72164	PTx	10	1.14707	0.044818
PTx-S1	24	30	TAWGNND	777.316	5.68963	PTx	30	1.30357	0.023631	2.45064
PTx-S1	24	30	TAWGNND	777.316	5.67916	PTx-E6290	0	0	0
PTx-S1	24	30	TAWGNND	777.316	5.71143	PTx-E6290	10	1.12173	0.016431
PTx-S1	24	30	TAWGNND	777.316	5.69286	PTx-E6290	30	1.25777	0.013197	2.3795	0.071145	0.134454
PTx-S1	36	42	LTGRSCQ	764.372	4.5822	PTx	0	0	0
PTx-S1	36	42	LTGRSCQ	764.372	4.59644	PTx	10	1.51744	0.028608
PTx-S1	36	42	LTGRSCQ	764.372	4.5509	PTx	30	1.6262	0.037492	3.14364
PTx-S1	36	42	LTGRSCQ	764.372	4.5822	PTx-E6290	0	0	0
PTx-S1	36	42	LTGRSCQ	764.372	4.56372	PTx-E6290	10	1.26089	0.110584
PTx-S1	36	42	LTGRSCQ	764.372	4.55317	PTx-E6290	30	1.26461	0.151227	2.5255	0.618142	0.453681
PTx-S1	44	51	GSSNSAFV	768.352	5.7639	PTx	0	0	0
PTx-S1	44	51	GSSNSAFV	768.352	5.8117	PTx	10	0.627274	0.018578
PTx-S1	44	51	GSSNSAFV	768.352	5.77834	PTx	30	0.5716	0.043592	1.19887
PTx-S1	44	51	GSSNSAFV	768.352	5.7639	PTx-E6290	0	0	0
PTx-S1	44	51	GSSNSAFV	768.352	5.8009	PTx-E6290	10	0.521115	0.030368
PTx-S1	44	51	GSSNSAFV	768.352	5.77836	PTx-E6290	30	0.535435	0.054241	1.05655	0.142324	0.162723
PTx-S1	45	51	SSNSAFV	711.331	6.80103	PTx	0	0	0
PTx-S1	45	51	SSNSAFV	711.331	6.84934	PTx	10	0.415872	0.064109
PTx-S1	45	51	SSNSAFV	711.331	6.81753	PTx	30	0.556989	0.022401	0.972861
PTx-S1	45	51	SSNSAFV	711.331	6.80103	PTx-E6290	0	0	0
PTx-S1	45	51	SSNSAFV	711.331	6.83559	PTx-E6290	10	0.348448	0.041857
PTx-S1	45	51	SSNSAFV	711.331	6.81481	PTx-E6290	30	0.423389	0.021899	0.771837	0.201024	0.192327
PTx-S1	51	62	VSTSSSRRYTEV	1371.69	4.64976	PTx	0	0	0
PTx-S1	51	62	VSTSSSRRYTEV	1371.69	4.65806	PTx	10	1.21655	0.194067
PTx-S1	51	62	VSTSSSRRYTEV	1371.69	4.59259	PTx	30	1.36556	0.191292	2.58211
PTx-S1	51	62	VSTSSSRRYTEV	1371.69	4.64976	PTx-E6290	0	0	0
PTx-S1	51	62	VSTSSSRRYTEV	1371.69	4.60512	PTx-E6290	10	1.08557	0.193933
PTx-S1	51	62	VSTSSSRRYTEV	1371.69	4.59401	PTx-E6290	30	1.1481	0.201904	2.23367	0.348436	0.605712
PTx-S1	51	63	VSTSSSRRYTEVY	1534.75	5.13421	PTx	0	0	0
PTx-S1	51	63	VSTSSSRRYTEVY	1534.75	5.17998	PTx	10	1.24937	0.064011
PTx-S1	51	63	VSTSSSRRYTEVY	1534.75	5.16242	PTx	30	1.3913	0.097603	2.64067
PTx-S1	51	63	VSTSSSRRYTEVY	1534.75	5.13421	PTx-E6290	0	0	0
PTx-S1	51	63	VSTSSSRRYTEVY	1534.75	5.19595	PTx-E6290	10	1.1454	0.087103
PTx-S1	51	63	VSTSSSRRYTEVY	1534.75	5.15926	PTx-E6290	30	1.22615	0.118094	2.37155	0.269117	0.354282
PTx-S1	51	64	VSTSSSRRYTEVYL	1647.83	5.8319	PTx	0	0	0
PTx-S1	51	64	VSTSSSRRYTEVYL	1647.83	5.87827	PTx	10	1.36353	0.157518
PTx-S1	51	64	VSTSSSRRYTEVYL	1647.83	5.846	PTx	30	1.57151	0.086831	2.93504
PTx-S1	51	64	VSTSSSRRYTEVYL	1647.83	5.8319	PTx-E6290	0	0	0
PTx-S1	51	64	VSTSSSRRYTEVYL	1647.83	5.8635	PTx-E6290	10	1.24129	0.104965
PTx-S1	51	64	VSTSSSRRYTEVYL	1647.83	5.84548	PTx-E6290	30	1.45883	0.100473	2.70013	0.234911	0.472554
PTx-S1	51	70	VSTSSSRRYTEVYLEHRMQE	2458.18	5.49864	PTx	0	0	0
PTx-S1	51	70	VSTSSSRRYTEVYLEHRMQE	2458.18	5.53757	PTx	10	1.56637	0.229634
PTx-S1	51	70	VSTSSSRRYTEVYLEHRMQE	2458.18	5.50542	PTx	30	1.6375	0.183644	3.20386
PTx-S1	51	70	VSTSSSRRYTEVYLEHRMQE	2458.18	5.49864	PTx-E6290	0	0	0
PTx-S1	51	70	VSTSSSRRYTEVYLEHRMQE	2458.18	5.5255	PTx-E6290	10	1.45425	0.185921
PTx-S1	51	70	VSTSSSRRYTEVYLEHRMQE	2458.18	5.50538	PTx-E6290	30	1.47641	0.222635	2.93065	0.273211	0.688902
PTx-S1	51	73	VSTSSSRRYTEVYLEHRMQEAVE	2757.33	6.11623	PTx	0	0	0
PTx-S1	51	73	VSTSSSRRYTEVYLEHRMQEAVE	2757.33	6.16092	PTx	10	1.63646	0.26097
PTx-S1	51	73	VSTSSSRRYTEVYLEHRMQEAVE	2757.33	6.12837	PTx	30	1.8999	0.306761	3.53636
PTx-S1	51	73	VSTSSSRRYTEVYLEHRMQEAVE	2757.33	6.11623	PTx-E6290	0	0	0
PTx-S1	51	73	VSTSSSRRYTEVYLEHRMQEAVE	2757.33	6.14816	PTx-E6290	10	1.56644	0.241638
PTx-S1	51	73	VSTSSSRRYTEVYLEHRMQEAVE	2757.33	6.12809	PTx-E6290	30	1.76149	0.30904	3.32793	0.208427	0.92712
PTx-S1	60	70	TEVYLEHRMQE	1434.67	5.34712	PTx	0	0	0
PTx-S1	60	70	TEVYLEHRMQE	1434.67	5.38874	PTx	10	0.267093	0.018881
PTx-S1	60	70	TEVYLEHRMQE	1434.67	5.35444	PTx	30	0.167989	0.065736	0.435082
PTx-S1	60	70	TEVYLEHRMQE	1434.67	5.34712	PTx-E6290	0	0	0
PTx-S1	60	70	TEVYLEHRMQE	1434.67	5.37946	PTx-E6290	10	0.158246	0.02522
PTx-S1	60	70	TEVYLEHRMQE	1434.67	5.35499	PTx-E6290	30	0.11076	0.077079	0.269006	0.166076	0.231237
PTx-S1	60	73	TEVYLEHRMQEAVE	1733.82	6.14467	PTx	0	0	0
PTx-S1	60	73	TEVYLEHRMQEAVE	1733.82	6.19088	PTx	10	0.48985	0.06221
PTx-S1	60	73	TEVYLEHRMQEAVE	1733.82	6.15827	PTx	30	0.553846	0.045819	1.0437
PTx-S1	60	73	TEVYLEHRMQEAVE	1733.82	6.14467	PTx-E6290	0	0	0
PTx-S1	60	73	TEVYLEHRMQEAVE	1733.82	6.17867	PTx-E6290	10	0.338188	0.184217
PTx-S1	60	73	TEVYLEHRMQEAVE	1733.82	6.15775	PTx-E6290	30	0.413715	0.02947	0.751903	0.291793	0.552651
PTx-S1	62	70	VYLEHRMQE	1204.58	4.86858	PTx	0	0	0
PTx-S1	62	70	VYLEHRMQE	1204.58	4.90859	PTx	10	0.204686	0.131417
PTx-S1	62	70	VYLEHRMQE	1204.58	4.87498	PTx	30	0.149607	0.119182	0.354293
PTx-S1	62	70	VYLEHRMQE	1204.58	4.86858	PTx-E6290	0	0	0
PTx-S1	62	70	VYLEHRMQE	1204.58	4.88749	PTx-E6290	10	0.157862	0.146419
PTx-S1	62	70	VYLEHRMQE	1204.58	4.87686	PTx-E6290	30	0.079122	0.14087	0.236984	0.117309	0.439257
PTx-S1	63	70	YLEHRMQE	1105.51	4.48964	PTx	0	0	0
PTx-S1	63	70	YLEHRMQE	1105.51	4.53036	PTx	10	0.220815	0.302666
PTx-S1	63	70	YLEHRMQE	1105.51	4.48052	PTx	30	0.153732	0.304701	0.374547
PTx-S1	63	70	YLEHRMQE	1105.51	4.48964	PTx-E6290	0	0	0
PTx-S1	63	70	YLEHRMQE	1105.51	4.49477	PTx-E6290	10	0.136155	0.292511
PTx-S1	63	70	YLEHRMQE	1105.51	4.4792	PTx-E6290	30	0.082047	0.267258	0.218202	0.156345	0.914103
PTx-S1	63	71	YLEHRMQEA	1176.55	4.57191	PTx	0	0	0
PTx-S1	63	71	YLEHRMQEA	1176.55	4.59767	PTx	10	0.225267	0.125694
PTx-S1	63	71	YLEHRMQEA	1176.55	4.55296	PTx	30	0.163205	0.119818	0.388472
PTx-S1	63	71	YLEHRMQEA	1176.55	4.57191	PTx-E6290	0	0	0
PTx-S1	63	71	YLEHRMQEA	1176.55	4.5658	PTx-E6290	10	0.122718	0.135077
PTx-S1	63	71	YLEHRMQEA	1176.55	4.55152	PTx-E6290	30	0.094261	0.124786	0.216979	0.171493	0.405231
PTx-S1	64	70	LEHRMQE	942.446	4.48466	PTx	0	0	0
PTx-S1	64	70	LEHRMQE	942.446	4.52692	PTx	10	0.164014	0.09522
PTx-S1	64	70	LEHRMQE	942.446	4.48217	PTx	30	0.115782	0.092606	0.279796
PTx-S1	64	70	LEHRMQE	942.446	4.48466	PTx-E6290	0	0	0
PTx-S1	64	70	LEHRMQE	942.446	4.49568	PTx-E6290	10	0.070346	0.086767
PTx-S1	64	70	LEHRMQE	942.446	4.48021	PTx-E6290	30	-0.009799	0.105914	0.060547	0.219249	0.317742
PTx-S1	64	73	LEHRMQEAVE	1241.59	4.55716	PTx	0	0	0
PTx-S1	64	73	LEHRMQEAVE	1241.59	4.59092	PTx	10	0.301891	0.182854
PTx-S1	64	73	LEHRMQEAVE	1241.59	4.53087	PTx	30	0.294046	0.167682	0.595937
PTx-S1	64	73	LEHRMQEAVE	1241.59	4.55716	PTx-E6290	0	0	0
PTx-S1	64	73	LEHRMQEAVE	1241.59	4.54527	PTx-E6290	10	0.21109	0.178151
PTx-S1	64	73	LEHRMQEAVE	1241.59	4.53128	PTx-E6290	30	0.233197	0.168927	0.444287	0.15165	0.548562
PTx-S1	65	73	EHRMQEAVE	1128.51	4.20488	PTx	0	0	0
PTx-S1	65	73	EHRMQEAVE	1128.51	4.25192	PTx	10	0.270627	0.106237
PTx-S1	65	73	EHRMQEAVE	1128.51	4.22539	PTx	30	0.287675	0.110197	0.558302
PTx-S1	65	73	EHRMQEAVE	1128.51	4.20488	PTx-E6290	0	0	0
PTx-S1	65	73	EHRMQEAVE	1128.51	4.24002	PTx-E6290	10	0.120092	0.177374
PTx-S1	65	73	EHRMQEAVE	1128.51	4.22603	PTx-E6290	30	0.042225	0.183079	0.162317	0.395985	0.549237
PTx-S1	69	76	QEAVEAER	931.448	6.01747	PTx	0	0	0
PTx-S1	69	76	QEAVEAER	931.448	6.06312	PTx	10	0.636602	0.09594
PTx-S1	69	76	QEAVEAER	931.448	6.03293	PTx	30	0.735544	0.097728	1.37215
PTx-S1	69	76	QEAVEAER	931.448	6.01747	PTx-E6290	0	0	0
PTx-S1	69	76	QEAVEAER	931.448	6.05321	PTx-E6290	10	0.551915	0.144087
PTx-S1	69	76	QEAVEAER	931.448	6.03285	PTx-E6290	30	0.612294	0.13695	1.16421	0.207937	0.432261
PTx-S1	74	87	AERAGRGTGHFIGY	1491.75	4.93367	PTx	0	0	0
PTx-S1	74	87	AERAGRGTGHFIGY	1491.75	4.97867	PTx	10	2.05081	0.256756
PTx-S1	74	87	AERAGRGTGHFIGY	1491.75	4.95263	PTx	30	2.40428	0.301134	4.45509
PTx-S1	74	87	AERAGRGTGHFIGY	1491.75	4.93367	PTx-E6290	0	0	0
PTx-S1	74	87	AERAGRGTGHFIGY	1491.75	4.96537	PTx-E6290	10	1.95087	0.267299
PTx-S1	74	87	AERAGRGTGHFIGY	1491.75	4.95177	PTx-E6290	30	2.05061	0.314729	4.00148	0.453613	0.944187
PTx-S1	74	89	AERAGRGTGHFIGYIY	1767.89	5.91634	PTx	0	0	0
PTx-S1	74	89	AERAGRGTGHFIGYIY	1767.89	5.96357	PTx	10	2.0101	0.125301
PTx-S1	74	89	AERAGRGTGHFIGYIY	1767.89	5.93276	PTx	30	2.39715	0.064197	4.40725
PTx-S1	74	89	AERAGRGTGHFIGYIY	1767.89	5.91634	PTx-E6290	0	0	0
PTx-S1	74	89	AERAGRGTGHFIGYIY	1767.89	5.95184	PTx-E6290	10	1.99938	0.081153
PTx-S1	74	89	AERAGRGTGHFIGYIY	1767.89	5.93007	PTx-E6290	30	2.11242	0.092322	4.1118	0.295452	0.375903
PTx-S1	77	87	AGRGTGHFIGY	1135.56	5.33133	PTx	0	0	0
PTx-S1	77	87	AGRGTGHFIGY	1135.56	5.37533	PTx	10	1.64377	0.038171
PTx-S1	77	87	AGRGTGHFIGY	1135.56	5.34038	PTx	30	1.76672	0.04889	3.41049
PTx-S1	77	87	AGRGTGHFIGY	1135.56	5.33133	PTx-E6290	0	0	0
PTx-S1	77	87	AGRGTGHFIGY	1135.56	5.36584	PTx-E6290	10	1.63	0.062603
PTx-S1	77	87	AGRGTGHFIGY	1135.56	5.33818	PTx-E6290	30	1.67317	0.028045	3.30317	0.107321	0.187809
PTx-S1	80	87	GTGHFIGY	851.405	4.91049	PTx	0	0	0
PTx-S1	80	87	GTGHFIGY	851.405	4.95241	PTx	10	1.48203	0.078617
PTx-S1	80	87	GTGHFIGY	851.405	4.92093	PTx	30	1.52785	0.167456	3.00988
PTx-S1	80	87	GTGHFIGY	851.405	4.91049	PTx-E6290	0	0	0
PTx-S1	80	87	GTGHFIGY	851.405	4.93231	PTx-E6290	10	1.34016	0.223921
PTx-S1	80	87	GTGHFIGY	851.405	4.92848	PTx-E6290	30	1.25237	0.055167	2.59253	0.417351	0.671763
PTx-S1	82	98	GHFIGYIYEVRADNNFY	2077.98	6.26042	PTx	0	0	0
PTx-S1	82	98	GHFIGYIYEVRADNNFY	2077.98	6.3046	PTx	10	4.26443	0.064705
PTx-S1	82	98	GHFIGYIYEVRADNNFY	2077.98	6.27041	PTx	30	4.31569	0.045203	8.58011
PTx-S1	82	98	GHFIGYIYEVRADNNFY	2077.98	6.26042	PTx-E6290	0	0	0
PTx-S1	82	98	GHFIGYIYEVRADNNFY	2077.98	6.29197	PTx-E6290	10	4.14321	0.046896
PTx-S1	82	98	GHFIGYIYEVRADNNFY	2077.98	6.27053	PTx-E6290	30	4.20826	0.07658	8.35148	0.228636	0.22974
PTx-S1	88	104	IYEVRADNNFYGAASSY	1939.88	6.7183	PTx	0	0	0
PTx-S1	88	104	IYEVRADNNFYGAASSY	1939.88	6.75929	PTx	10	2.07775	0.257947
PTx-S1	88	104	IYEVRADNNFYGAASSY	1939.88	6.72952	PTx	30	2.42301	0.021261	4.50076
PTx-S1	88	104	IYEVRADNNFYGAASSY	1939.88	6.7183	PTx-E6290	0	0	0
PTx-S1	88	104	IYEVRADNNFYGAASSY	1939.88	6.74624	PTx-E6290	10	2.18992	0.033602
PTx-S1	88	104	IYEVRADNNFYGAASSY	1939.88	6.72651	PTx-E6290	30	2.18418	0.123965	4.3741	0.126665	0.773841
PTx-S1	90	97	EVRADNNF	964.448	5.06221	PTx	0	0	0
PTx-S1	90	97	EVRADNNF	964.448	5.10572	PTx	10	0.541985	0.077224
PTx-S1	90	97	EVRADNNF	964.448	5.08184	PTx	30	0.624606	0.073941	1.16659
PTx-S1	90	97	EVRADNNF	964.448	5.06221	PTx-E6290	0	0	0
PTx-S1	90	97	EVRADNNF	964.448	5.10626	PTx-E6290	10	0.427836	0.095773
PTx-S1	90	97	EVRADNNF	964.448	5.08022	PTx-E6290	30	0.443439	0.115655	0.871275	0.295316	0.346965
PTx-S1	90	98	EVRADNNFY	1127.51	5.87398	PTx	0	0	0
PTx-S1	90	98	EVRADNNFY	1127.51	5.91936	PTx	10	0.51578	0.052113
PTx-S1	90	98	EVRADNNFY	1127.51	5.887	PTx	30	0.590598	0.024227	1.10638
PTx-S1	90	98	EVRADNNFY	1127.51	5.87398	PTx-E6290	0	0	0
PTx-S1	90	98	EVRADNNFY	1127.51	5.90838	PTx-E6290	10	0.425712	0.068903
PTx-S1	90	98	EVRADNNFY	1127.51	5.88624	PTx-E6290	30	0.368833	0.045901	0.794545	0.311833	0.206709
PTx-S1	90	104	EVRADNNFYGAASSY	1663.73	6.37399	PTx	0	0	0
PTx-S1	90	104	EVRADNNFYGAASSY	1663.73	6.41652	PTx	10	1.96167	0.208923
PTx-S1	90	104	EVRADNNFYGAASSY	1663.73	6.3828	PTx	30	2.20542	0.058468	4.16709
PTx-S1	90	104	EVRADNNFYGAASSY	1663.73	6.37399	PTx-E6290	0	0	0
PTx-S1	90	104	EVRADNNFYGAASSY	1663.73	6.40405	PTx-E6290	10	1.97673	0.083438
PTx-S1	90	104	EVRADNNFYGAASSY	1663.73	6.38237	PTx-E6290	30	1.95349	0.112713	3.93022	0.236872	0.626769
PTx-S1	91	97	VRADNNF	835.406	4.83516	PTx	0	0	0
PTx-S1	91	97	VRADNNF	835.406	4.87426	PTx	10	0.531123	0.057627
PTx-S1	91	97	VRADNNF	835.406	4.84337	PTx	30	0.625191	0.04974	1.15631
PTx-S1	91	97	VRADNNF	835.406	4.83516	PTx-E6290	0	0	0
PTx-S1	91	97	VRADNNF	835.406	4.85693	PTx-E6290	10	0.427218	0.054244
PTx-S1	91	97	VRADNNF	835.406	4.84491	PTx-E6290	30	0.461831	0.048576	0.889049	0.267265	0.172881
PTx-S1	91	98	VRADNNFY	998.469	5.72572	PTx	0	0	0
PTx-S1	91	98	VRADNNFY	998.469	5.77254	PTx	10	0.566635	0.123135
PTx-S1	91	98	VRADNNFY	998.469	5.74089	PTx	30	0.573797	0.102792	1.14043
PTx-S1	91	98	VRADNNFY	998.469	5.72572	PTx-E6290	0	0	0
PTx-S1	91	98	VRADNNFY	998.469	5.76089	PTx-E6290	10	0.302509	0.062339
PTx-S1	91	98	VRADNNFY	998.469	5.74028	PTx-E6290	30	0.359805	0.067113	0.662314	0.478118	0.369405
PTx-S1	91	103	VRADNNFYGAASS	1371.63	5.53205	PTx	0	0	0
PTx-S1	91	103	VRADNNFYGAASS	1371.63	5.57344	PTx	10	2.15453	0.142081
PTx-S1	91	103	VRADNNFYGAASS	1371.63	5.53998	PTx	30	2.44556	0.128755	4.60009
PTx-S1	91	103	VRADNNFYGAASS	1371.63	5.53205	PTx-E6290	0	0	0
PTx-S1	91	103	VRADNNFYGAASS	1371.63	5.56349	PTx-E6290	10	2.17746	0.115684
PTx-S1	91	103	VRADNNFYGAASS	1371.63	5.54385	PTx-E6290	30	2.45096	0.069961	4.62842	-0.028336	0.426243
PTx-S1	91	104	VRADNNFYGAASSY	1534.69	6.2692	PTx	0	0	0
PTx-S1	91	104	VRADNNFYGAASSY	1534.69	6.31116	PTx	10	1.84933	0.147944
PTx-S1	91	104	VRADNNFYGAASSY	1534.69	6.27835	PTx	30	2.04327	0.108078	3.8926
PTx-S1	91	104	VRADNNFYGAASSY	1534.69	6.2692	PTx-E6290	0	0	0
PTx-S1	91	104	VRADNNFYGAASSY	1534.69	6.29986	PTx-E6290	10	1.86056	0.107701
PTx-S1	91	104	VRADNNFYGAASSY	1534.69	6.27646	PTx-E6290	30	1.83507	0.13397	3.69563	0.196969	0.443832
PTx-S1	91	105	VRADNNFYGAASSYF	1681.76	7.40048	PTx	0	0	0
PTx-S1	91	105	VRADNNFYGAASSYF	1681.76	7.43428	PTx	10	1.95499	0.118241
PTx-S1	91	105	VRADNNFYGAASSYF	1681.76	7.40269	PTx	30	2.18374	0.049335	4.13873
PTx-S1	91	105	VRADNNFYGAASSYF	1681.76	7.40048	PTx-E6290	0	0	0
PTx-S1	91	105	VRADNNFYGAASSYF	1681.76	7.42586	PTx-E6290	10	1.98565	0.07451
PTx-S1	91	105	VRADNNFYGAASSYF	1681.76	7.40009	PTx-E6290	30	2.06022	0.0517	4.04587	0.092863	0.354723
PTx-S1	91	106	VRADNNFYGAASSYFE	1810.8	7.33359	PTx	0	0	0
PTx-S1	91	106	VRADNNFYGAASSYFE	1810.8	7.36539	PTx	10	2.13177	0.097897
PTx-S1	91	106	VRADNNFYGAASSYFE	1810.8	7.33182	PTx	30	2.33778	0.009855	4.46955
PTx-S1	91	106	VRADNNFYGAASSYFE	1810.8	7.33359	PTx-E6290	0	0	0
PTx-S1	91	106	VRADNNFYGAASSYFE	1810.8	7.35487	PTx-E6290	10	2.19842	0.037549
PTx-S1	91	106	VRADNNFYGAASSYFE	1810.8	7.3311	PTx-E6290	30	2.19759	0.108333	4.39602	0.073538	0.324999
PTx-S1	93	104	ADNNFYGAASSY	1279.52	6.94188	PTx	0	0	0
PTx-S1	93	104	ADNNFYGAASSY	1279.52	6.97695	PTx	10	2.03282	0.175615
PTx-S1	93	104	ADNNFYGAASSY	1279.52	6.94688	PTx	30	2.18171	0.113099	4.21453
PTx-S1	93	104	ADNNFYGAASSY	1279.52	6.94188	PTx-E6290	0	0	0
PTx-S1	93	104	ADNNFYGAASSY	1279.52	6.96414	PTx-E6290	10	1.95827	0.212392
PTx-S1	93	104	ADNNFYGAASSY	1279.52	6.95159	PTx-E6290	30	2.36445	0.016851	4.32272	-0.108192	0.637176
PTx-S1	94	104	DNNFYGAASSY	1208.49	7.15066	PTx	0	0	0
PTx-S1	94	104	DNNFYGAASSY	1208.49	7.18195	PTx	10	1.78918	0.061333
PTx-S1	94	104	DNNFYGAASSY	1208.49	7.14984	PTx	30	2.08856	0.064909	3.87774
PTx-S1	94	104	DNNFYGAASSY	1208.49	7.15066	PTx-E6290	0	0	0
PTx-S1	94	104	DNNFYGAASSY	1208.49	7.16907	PTx-E6290	10	1.77705	0.082669
PTx-S1	94	104	DNNFYGAASSY	1208.49	7.14887	PTx-E6290	30	1.7737	0.104053	3.55075	0.326996	0.312159
PTx-S1	97	104	FYGAASSY	865.373	7.23264	PTx	0	0	0
PTx-S1	97	104	FYGAASSY	865.373	7.27326	PTx	10	0.979947	0.122275
PTx-S1	97	104	FYGAASSY	865.373	7.24157	PTx	30	0.997065	0.042813	1.97701
PTx-S1	97	104	FYGAASSY	865.373	7.23264	PTx-E6290	0	0	0
PTx-S1	97	104	FYGAASSY	865.373	7.26324	PTx-E6290	10	0.888318	0.035388
PTx-S1	97	104	FYGAASSY	865.373	7.2419	PTx-E6290	30	0.995473	0.02397	1.88379	0.093221	0.366825
PTx-S1	98	104	YGAASSY	718.304	5.50823	PTx	0	0	0
PTx-S1	98	104	YGAASSY	718.304	5.54991	PTx	10	1.04209	0.082753
PTx-S1	98	104	YGAASSY	718.304	5.51743	PTx	30	1.09546	0.024759	2.13755
PTx-S1	98	104	YGAASSY	718.304	5.50823	PTx-E6290	0	0	0
PTx-S1	98	104	YGAASSY	718.304	5.53977	PTx-E6290	10	1.00661	0.033112
PTx-S1	98	104	YGAASSY	718.304	5.51675	PTx-E6290	30	1.0337	0.065564	2.04031	0.097243	0.248259
PTx-S1	98	106	YGAASSYFE	994.415	7.01237	PTx	0	0	0
PTx-S1	98	106	YGAASSYFE	994.415	7.05301	PTx	10	1.06003	0.038166
PTx-S1	98	106	YGAASSYFE	994.415	7.024	PTx	30	1.00085	0.034242	2.06089
PTx-S1	98	106	YGAASSYFE	994.415	7.01237	PTx-E6290	0	0	0
PTx-S1	98	106	YGAASSYFE	994.415	7.04026	PTx-E6290	10	0.937029	0.03567
PTx-S1	98	106	YGAASSYFE	994.415	7.02597	PTx-E6290	30	0.995054	0.033277	1.93208	0.128803	0.114498
PTx-S1	99	106	GAASSYFE	831.352	6.66113	PTx	0	0	0
PTx-S1	99	106	GAASSYFE	831.352	6.71075	PTx	10	0.616073	0.039299
PTx-S1	99	106	GAASSYFE	831.352	6.67729	PTx	30	0.709292	0.018863	1.32537
PTx-S1	99	106	GAASSYFE	831.352	6.66113	PTx-E6290	0	0	0
PTx-S1	99	106	GAASSYFE	831.352	6.6986	PTx-E6290	10	0.80204	0.178903
PTx-S1	99	106	GAASSYFE	831.352	6.6784	PTx-E6290	30	0.606654	0.018806	1.40869	-0.083329	0.536709
PTx-S1	104	112	YFEYVDTYG	1156.48	6.89925	PTx	0	0	0
PTx-S1	104	112	YFEYVDTYG	1156.48	6.9348	PTx	10	1.87766	0.14
PTx-S1	104	112	YFEYVDTYG	1156.48	6.90423	PTx	30	2.0338	0.115033	3.91146
PTx-S1	104	112	YFEYVDTYG	1156.48	6.89925	PTx-E6290	0	0	0
PTx-S1	104	112	YFEYVDTYG	1156.48	6.91983	PTx-E6290	10	1.88705	0.118342
PTx-S1	104	112	YFEYVDTYG	1156.48	6.90604	PTx-E6290	30	1.87528	0.110218	3.76233	0.149127	0.42
PTx-S1	105	111	FEYVDTY	936.399	7.17929	PTx	0	0	0
PTx-S1	105	111	FEYVDTY	936.399	7.21824	PTx	10	0.281396	0.040262
PTx-S1	105	111	FEYVDTY	936.399	7.18714	PTx	30	0.435432	0.074226	0.716828
PTx-S1	105	111	FEYVDTY	936.399	7.17929	PTx-E6290	0	0	0
PTx-S1	105	111	FEYVDTY	936.399	7.20611	PTx-E6290	10	0.208119	0.02803
PTx-S1	105	111	FEYVDTY	936.399	7.18321	PTx-E6290	30	0.272349	0.027816	0.480468	0.23636	0.222678
PTx-S1	105	119	FEYVDTYGDNAGRIL	1732.82	7.05201	PTx	0	0	0
PTx-S1	105	119	FEYVDTYGDNAGRIL	1732.82	7.08994	PTx	10	1.73901	0.084993
PTx-S1	105	119	FEYVDTYGDNAGRIL	1732.82	7.05643	PTx	30	2.29402	0.062342	4.03303
PTx-S1	105	119	FEYVDTYGDNAGRIL	1732.82	7.05201	PTx-E6290	0	0	0
PTx-S1	105	119	FEYVDTYGDNAGRIL	1732.82	7.07466	PTx-E6290	10	1.68741	0.058633
PTx-S1	105	119	FEYVDTYGDNAGRIL	1732.82	7.05363	PTx-E6290	30	1.89269	0.105617	3.58009	0.452938	0.316851
PTx-S1	105	120	FEYVDTYGDNAGRILA	1803.85	6.94243	PTx	0	0	0
PTx-S1	105	120	FEYVDTYGDNAGRILA	1803.85	6.97833	PTx	10	2.23721	0.105345
PTx-S1	105	120	FEYVDTYGDNAGRILA	1803.85	6.94562	PTx	30	2.78378	0.026706	5.02099
PTx-S1	105	120	FEYVDTYGDNAGRILA	1803.85	6.94243	PTx-E6290	0	0	0
PTx-S1	105	120	FEYVDTYGDNAGRILA	1803.85	6.96349	PTx-E6290	10	2.14867	0.065121
PTx-S1	105	120	FEYVDTYGDNAGRILA	1803.85	6.94668	PTx-E6290	30	2.43832	0.069139	4.58699	0.433998	0.316035
PTx-S1	105	123	FEYVDTYGDNAGRILAGAL	2045	7.80535	PTx	0	0	0
PTx-S1	105	123	FEYVDTYGDNAGRILAGAL	2045	7.83938	PTx	10	2.45052	0.132156
PTx-S1	105	123	FEYVDTYGDNAGRILAGAL	2045	7.80065	PTx	30	3.04857	0.111057	5.4991
PTx-S1	105	123	FEYVDTYGDNAGRILAGAL	2045	7.80535	PTx-E6290	0	0	0
PTx-S1	105	123	FEYVDTYGDNAGRILAGAL	2045	7.82712	PTx-E6290	10	2.31031	0.081626
PTx-S1	105	123	FEYVDTYGDNAGRILAGAL	2045	7.79991	PTx-E6290	30	2.68429	0.129875	4.9946	0.504496	0.396468
PTx-S1	105	125	FEYVDTYGDNAGRILAGALAT	2217.08	7.87227	PTx	0	0	0
PTx-S1	105	125	FEYVDTYGDNAGRILAGALAT	2217.08	7.90361	PTx	10	2.91282	0.093283
PTx-S1	105	125	FEYVDTYGDNAGRILAGALAT	2217.08	7.86472	PTx	30	3.6896	0.038704	6.60242
PTx-S1	105	125	FEYVDTYGDNAGRILAGALAT	2217.08	7.87227	PTx-E6290	0	0	0
PTx-S1	105	125	FEYVDTYGDNAGRILAGALAT	2217.08	7.89238	PTx-E6290	10	2.71633	0.093849
PTx-S1	105	125	FEYVDTYGDNAGRILAGALAT	2217.08	7.86534	PTx-E6290	30	3.15095	0.100885	5.86729	0.735134	0.302655
PTx-S1	106	123	EYVDTYGDNAGRILAGAL	1897.93	7.55759	PTx	0	0	0
PTx-S1	106	123	EYVDTYGDNAGRILAGAL	1897.93	7.58533	PTx	10	2.51749	0.106695
PTx-S1	106	123	EYVDTYGDNAGRILAGAL	1897.93	7.55034	PTx	30	3.09156	0.070464	5.60905
PTx-S1	106	123	EYVDTYGDNAGRILAGAL	1897.93	7.55759	PTx-E6290	0	0	0
PTx-S1	106	123	EYVDTYGDNAGRILAGAL	1897.93	7.57413	PTx-E6290	10	2.37922	0.075495
PTx-S1	106	123	EYVDTYGDNAGRILAGAL	1897.93	7.54897	PTx-E6290	30	2.79304	0.179414	5.17226	0.436795	0.538242
PTx-S1	107	123	YVDTYGDNAGRILAGAL	1768.89	7.43194	PTx	0	0	0
PTx-S1	107	123	YVDTYGDNAGRILAGAL	1768.89	7.46103	PTx	10	2.38945	0.047767
PTx-S1	107	123	YVDTYGDNAGRILAGAL	1768.89	7.42727	PTx	30	2.88872	0.094776	5.27817
PTx-S1	107	123	YVDTYGDNAGRILAGAL	1768.89	7.43194	PTx-E6290	0	0	0
PTx-S1	107	123	YVDTYGDNAGRILAGAL	1768.89	7.45228	PTx-E6290	10	2.20917	0.078261
PTx-S1	107	123	YVDTYGDNAGRILAGAL	1768.89	7.42742	PTx-E6290	30	2.55429	0.054602	4.76346	0.514712	0.284328
PTx-S1	107	125	YVDTYGDNAGRILAGALAT	1940.97	7.52182	PTx	0	0	0
PTx-S1	107	125	YVDTYGDNAGRILAGALAT	1940.97	7.54893	PTx	10	2.67704	0.178909
PTx-S1	107	125	YVDTYGDNAGRILAGALAT	1940.97	7.51376	PTx	30	3.48264	0.052949	6.15968
PTx-S1	107	125	YVDTYGDNAGRILAGALAT	1940.97	7.52182	PTx-E6290	0	0	0
PTx-S1	107	125	YVDTYGDNAGRILAGALAT	1940.97	7.53683	PTx-E6290	10	2.589	0.094953
PTx-S1	107	125	YVDTYGDNAGRILAGALAT	1940.97	7.51549	PTx-E6290	30	3.00127	0.019003	5.59027	0.569415	0.536727
PTx-S1	108	119	VDTYGDNAGRIL	1293.64	6.1464	PTx	0	0	0
PTx-S1	108	119	VDTYGDNAGRIL	1293.64	6.19043	PTx	10	1.78896	0.071564
PTx-S1	108	119	VDTYGDNAGRIL	1293.64	6.15631	PTx	30	2.29451	0.038527	4.08347
PTx-S1	108	119	VDTYGDNAGRIL	1293.64	6.1464	PTx-E6290	0	0	0
PTx-S1	108	119	VDTYGDNAGRIL	1293.64	6.17688	PTx-E6290	10	1.71721	0.037243
PTx-S1	108	119	VDTYGDNAGRIL	1293.64	6.1552	PTx-E6290	30	1.95718	0.120421	3.67439	0.409078	0.361263
PTx-S1	108	120	VDTYGDNAGRILA	1364.68	6.02485	PTx	0	0	0
PTx-S1	108	120	VDTYGDNAGRILA	1364.68	6.06257	PTx	10	2.038	0.079228
PTx-S1	108	120	VDTYGDNAGRILA	1364.68	6.03115	PTx	30	2.42219	0.103998	4.4602
PTx-S1	108	120	VDTYGDNAGRILA	1364.68	6.02485	PTx-E6290	0	0	0
PTx-S1	108	120	VDTYGDNAGRILA	1364.68	6.04768	PTx-E6290	10	1.98567	0.078623
PTx-S1	108	120	VDTYGDNAGRILA	1364.68	6.02777	PTx-E6290	30	2.21426	0.13533	4.19993	0.260269	0.40599
PTx-S1	108	123	VDTYGDNAGRILAGAL	1605.82	7.29633	PTx	0	0	0
PTx-S1	108	123	VDTYGDNAGRILAGAL	1605.82	7.32717	PTx	10	2.1379	0.08016
PTx-S1	108	123	VDTYGDNAGRILAGAL	1605.82	7.29131	PTx	30	2.57079	0.032332	4.70869
PTx-S1	108	123	VDTYGDNAGRILAGAL	1605.82	7.29633	PTx-E6290	0	0	0
PTx-S1	108	123	VDTYGDNAGRILAGAL	1605.82	7.31426	PTx-E6290	10	2.04516	0.065245
PTx-S1	108	123	VDTYGDNAGRILAGAL	1605.82	7.29155	PTx-E6290	30	2.1417	0.063258	4.18685	0.52184	0.24048
PTx-S1	108	125	VDTYGDNAGRILAGALAT	1777.91	7.39039	PTx	0	0	0
PTx-S1	108	125	VDTYGDNAGRILAGALAT	1777.91	7.41242	PTx	10	2.64435	0.016431
PTx-S1	108	125	VDTYGDNAGRILAGALAT	1777.91	7.38183	PTx	30	3.21405	0.108899	5.8584
PTx-S1	108	125	VDTYGDNAGRILAGALAT	1777.91	7.39039	PTx-E6290	0	0	0
PTx-S1	108	125	VDTYGDNAGRILAGALAT	1777.91	7.40804	PTx-E6290	10	2.23805	0.220071
PTx-S1	108	125	VDTYGDNAGRILAGALAT	1777.91	7.38445	PTx-E6290	30	2.84609	0.016431	5.08414	0.774259	0.660213
PTx-S1	110	119	TYGDNAGRIL	1079.55	5.88406	PTx	0	0	0
PTx-S1	110	119	TYGDNAGRIL	1079.55	5.92618	PTx	10	1.90056	0.066233
PTx-S1	110	119	TYGDNAGRIL	1079.55	5.893	PTx	30	2.33799	0.028421	4.23855
PTx-S1	110	119	TYGDNAGRIL	1079.55	5.88406	PTx-E6290	0	0	0
PTx-S1	110	119	TYGDNAGRIL	1079.55	5.91387	PTx-E6290	10	1.86252	0.023438
PTx-S1	110	119	TYGDNAGRIL	1079.55	5.89298	PTx-E6290	30	2.01689	0.147989	3.87942	0.359133	0.443967
PTx-S1	110	120	TYGDNAGRILA	1150.59	5.74515	PTx	0	0	0
PTx-S1	110	120	TYGDNAGRILA	1150.59	5.78558	PTx	10	1.98497	0.098847
PTx-S1	110	120	TYGDNAGRILA	1150.59	5.75076	PTx	30	2.38994	0.048602	4.37491
PTx-S1	110	120	TYGDNAGRILA	1150.59	5.74515	PTx-E6290	0	0	0
PTx-S1	110	120	TYGDNAGRILA	1150.59	5.77376	PTx-E6290	10	1.93132	0.092638
PTx-S1	110	120	TYGDNAGRILA	1150.59	5.75231	PTx-E6290	30	2.10955	0.05642	4.04086	0.334051	0.296541
PTx-S1	110	123	TYGDNAGRILAGAL	1391.73	7.07107	PTx	0	0	0
PTx-S1	110	123	TYGDNAGRILAGAL	1391.73	7.09842	PTx	10	2.11547	0.095401
PTx-S1	110	123	TYGDNAGRILAGAL	1391.73	7.06454	PTx	30	2.64331	0.094991	4.75878
PTx-S1	110	123	TYGDNAGRILAGAL	1391.73	7.07107	PTx-E6290	0	0	0
PTx-S1	110	123	TYGDNAGRILAGAL	1391.73	7.08454	PTx-E6290	10	2.07751	0.054304
PTx-S1	110	123	TYGDNAGRILAGAL	1391.73	7.06357	PTx-E6290	30	2.25797	0.041039	4.33548	0.423299	0.286203
PTx-S1	111	119	YGDNAGRIL	978.5	5.73449	PTx	0	0	0
PTx-S1	111	119	YGDNAGRIL	978.5	5.77878	PTx	10	1.38523	0.11944
PTx-S1	111	119	YGDNAGRIL	978.5	5.74685	PTx	30	1.73714	0.082732	3.12237
PTx-S1	111	119	YGDNAGRIL	978.5	5.73449	PTx-E6290	0	0	0
PTx-S1	111	119	YGDNAGRIL	978.5	5.76846	PTx-E6290	10	1.28934	0.07702
PTx-S1	111	119	YGDNAGRIL	978.5	5.74841	PTx-E6290	30	1.50286	0.024996	2.7922	0.330167	0.35832
PTx-S1	114	120	NAGRILA	714.426	4.71922	PTx	0	0	0
PTx-S1	114	120	NAGRILA	714.426	4.76396	PTx	10	0.759789	0.035046
PTx-S1	114	120	NAGRILA	714.426	4.73268	PTx	30	1.09924	0.05681	1.85903
PTx-S1	114	120	NAGRILA	714.426	4.71922	PTx-E6290	0	0	0
PTx-S1	114	120	NAGRILA	714.426	4.74439	PTx-E6290	10	0.642148	0.032606
PTx-S1	114	120	NAGRILA	714.426	4.73989	PTx-E6290	30	0.973373	0.065123	1.61552	0.243512	0.195369
PTx-S1	130	146	YLAHRRIPPENIRRVTR	2147.24	4.29709	PTx	0	0	0
PTx-S1	130	146	YLAHRRIPPENIRRVTR	2147.24	4.33645	PTx	10	0.672141	0.142804
PTx-S1	130	146	YLAHRRIPPENIRRVTR	2147.24	4.2715	PTx	30	0.7602	0.135309	1.43234
PTx-S1	130	146	YLAHRRIPPENIRRVTR	2147.24	4.29709	PTx-E6290	0	0	0
PTx-S1	130	146	YLAHRRIPPENIRRVTR	2147.24	4.28542	PTx-E6290	10	0.29952	0.1513
PTx-S1	130	146	YLAHRRIPPENIRRVTR	2147.24	4.27257	PTx-E6290	30	0.310628	0.125055	0.610148	0.822193	0.4539
PTx-S1	147	155	VYHNGITGE	989.469	4.89053	PTx	0	0	0
PTx-S1	147	155	VYHNGITGE	989.469	4.92808	PTx	10	1.81357	0.168261
PTx-S1	147	155	VYHNGITGE	989.469	4.89714	PTx	30	2.20851	0.059673	4.02207
PTx-S1	147	155	VYHNGITGE	989.469	4.89053	PTx-E6290	0	0	0
PTx-S1	147	155	VYHNGITGE	989.469	4.9097	PTx-E6290	10	1.87915	0.11078
PTx-S1	147	155	VYHNGITGE	989.469	4.89796	PTx-E6290	30	1.97157	0.164745	3.85072	0.171353	0.504783
PTx-S1	147	160	VYHNGITGETTTTE	1522.7	5.07224	PTx	0	0	0
PTx-S1	147	160	VYHNGITGETTTTE	1522.7	5.11146	PTx	10	2.66825	0.203934
PTx-S1	147	160	VYHNGITGETTTTE	1522.7	5.08624	PTx	30	3.03237	0.119806	5.70062
PTx-S1	147	160	VYHNGITGETTTTE	1522.7	5.07224	PTx-E6290	0	0	0
PTx-S1	147	160	VYHNGITGETTTTE	1522.7	5.12213	PTx-E6290	10	2.58042	0.063258
PTx-S1	147	160	VYHNGITGETTTTE	1522.7	5.08585	PTx-E6290	30	2.72744	0.112545	5.30786	0.39276	0.611802
PTx-S1	147	161	VYHNGITGETTTTEY	1685.77	5.72432	PTx	0	0	0
PTx-S1	147	161	VYHNGITGETTTTEY	1685.77	5.7666	PTx	10	2.89335	0.147229
PTx-S1	147	161	VYHNGITGETTTTEY	1685.77	5.73312	PTx	30	3.22538	0.020291	6.11874
PTx-S1	147	161	VYHNGITGETTTTEY	1685.77	5.72432	PTx-E6290	0	0	0
PTx-S1	147	161	VYHNGITGETTTTEY	1685.77	5.75518	PTx-E6290	10	2.78477	0.030557
PTx-S1	147	161	VYHNGITGETTTTEY	1685.77	5.73342	PTx-E6290	30	2.91426	0.162534	5.69903	0.419703	0.487602
PTx-S1	147	164	VYHNGITGETTTTEYSNA	1957.88	5.55117	PTx	0	0	0
PTx-S1	147	164	VYHNGITGETTTTEYSNA	1957.88	5.59013	PTx	10	4.02912	0.297393
PTx-S1	147	164	VYHNGITGETTTTEYSNA	1957.88	5.55458	PTx	30	4.74993	0.031183	8.77905
PTx-S1	147	164	VYHNGITGETTTTEYSNA	1957.88	5.55117	PTx-E6290	0	0	0
PTx-S1	147	164	VYHNGITGETTTTEYSNA	1957.88	5.5773	PTx-E6290	10	4.27249	0.082576
PTx-S1	147	164	VYHNGITGETTTTEYSNA	1957.88	5.55567	PTx-E6290	30	4.25529	0.331994	8.52778	0.25127	0.995982
PTx-S1	147	165	VYHNGITGETTTTEYSNAR	2113.98	5.12047	PTx	0	0	0
PTx-S1	147	165	VYHNGITGETTTTEYSNAR	2113.98	5.15882	PTx	10	4.72755	0.176063
PTx-S1	147	165	VYHNGITGETTTTEYSNAR	2113.98	5.13931	PTx	30	5.22371	0.199284	9.95126
PTx-S1	147	165	VYHNGITGETTTTEYSNAR	2113.98	5.12047	PTx-E6290	0	0	0
PTx-S1	147	165	VYHNGITGETTTTEYSNAR	2113.98	5.17641	PTx-E6290	10	4.50695	0.095763
PTx-S1	147	165	VYHNGITGETTTTEYSNAR	2113.98	5.13731	PTx-E6290	30	4.86352	0.362474	9.37047	0.580791	1.08742
PTx-S1	156	164	TTTTEYSNA	987.427	6.44587	PTx	0	0	0
PTx-S1	156	164	TTTTEYSNA	987.427	6.49016	PTx	10	1.23888	0.189243
PTx-S1	156	164	TTTTEYSNA	987.427	6.45374	PTx	30	1.26446	0.175883	2.50334
PTx-S1	156	164	TTTTEYSNA	987.427	6.44587	PTx-E6290	0	0	0
PTx-S1	156	164	TTTTEYSNA	987.427	6.47644	PTx-E6290	10	1.04289	0.069419
PTx-S1	156	164	TTTTEYSNA	987.427	6.45863	PTx-E6290	30	1.14002	0.065443	2.18291	0.320427	0.567729
PTx-S1	164	191	ARYVSQQTRANPNPYTSRRSVASIVGTL	3092.63	6.06621	PTx	0	0	0
PTx-S1	164	191	ARYVSQQTRANPNPYTSRRSVASIVGTL	3092.63	6.09986	PTx	10	7.78296	0.116572
PTx-S1	164	191	ARYVSQQTRANPNPYTSRRSVASIVGTL	3092.63	6.06865	PTx	30	8.3262	0.089488	16.1092
PTx-S1	164	191	ARYVSQQTRANPNPYTSRRSVASIVGTL	3092.63	6.06621	PTx-E6290	0	0	0
PTx-S1	164	191	ARYVSQQTRANPNPYTSRRSVASIVGTL	3092.63	6.08985	PTx-E6290	10	6.27105	0.112747
PTx-S1	164	191	ARYVSQQTRANPNPYTSRRSVASIVGTL	3092.63	6.06684	PTx-E6290	30	6.57888	0.104698	12.8499	3.25923	0.349716
PTx-S1	165	185	RYVSQQTRANPNPYTSRRSVA	2451.26	4.46789	PTx	0	0	0
PTx-S1	165	185	RYVSQQTRANPNPYTSRRSVA	2451.26	4.50031	PTx	10	5.67978	0.179721
PTx-S1	165	185	RYVSQQTRANPNPYTSRRSVA	2451.26	4.42631	PTx	30	6.23076	0.109572	11.9105
PTx-S1	165	185	RYVSQQTRANPNPYTSRRSVA	2451.26	4.46789	PTx-E6290	0	0	0
PTx-S1	165	185	RYVSQQTRANPNPYTSRRSVA	2451.26	4.43928	PTx-E6290	10	3.90467	0.079975
PTx-S1	165	185	RYVSQQTRANPNPYTSRRSVA	2451.26	4.43235	PTx-E6290	30	4.31608	0.171559	8.22076	3.68979	0.539163
PTx-S1	165	191	RYVSQQTRANPNPYTSRRSVASIVGTL	3021.6	6.05686	PTx	0	0	0
PTx-S1	165	191	RYVSQQTRANPNPYTSRRSVASIVGTL	3021.6	6.09207	PTx	10	7.12721	0.234625
PTx-S1	165	191	RYVSQQTRANPNPYTSRRSVASIVGTL	3021.6	6.05951	PTx	30	7.87934	0.102256	15.0065
PTx-S1	165	191	RYVSQQTRANPNPYTSRRSVASIVGTL	3021.6	6.05686	PTx-E6290	0	0	0
PTx-S1	165	191	RYVSQQTRANPNPYTSRRSVASIVGTL	3021.6	6.0802	PTx-E6290	10	5.88914	0.113504
PTx-S1	165	191	RYVSQQTRANPNPYTSRRSVASIVGTL	3021.6	6.05717	PTx-E6290	30	6.12588	0.13017	12.015	2.99152	0.703875
PTx-S1	170	181	QTRANPNPYTSR	1404.7	4.23479	PTx	0	0	0
PTx-S1	170	181	QTRANPNPYTSR	1404.7	4.27652	PTx	10	1.87887	0.083831
PTx-S1	170	181	QTRANPNPYTSR	1404.7	4.23589	PTx	30	1.97281	0.060749	3.85168
PTx-S1	170	181	QTRANPNPYTSR	1404.7	4.23479	PTx-E6290	0	0	0
PTx-S1	170	181	QTRANPNPYTSR	1404.7	4.25092	PTx-E6290	10	1.5571	0.110546
PTx-S1	170	181	QTRANPNPYTSR	1404.7	4.23597	PTx-E6290	30	1.64073	0.075608	3.19783	0.653856	0.331638
PTx-S1	171	181	TRANPNPYTSR	1276.64	4.20715	PTx	0	0	0
PTx-S1	171	181	TRANPNPYTSR	1276.64	4.25378	PTx	10	0.937136	0.116817
PTx-S1	171	181	TRANPNPYTSR	1276.64	4.21517	PTx	30	1.04774	0.08694	1.98487
PTx-S1	171	181	TRANPNPYTSR	1276.64	4.20715	PTx-E6290	0	0	0
PTx-S1	171	181	TRANPNPYTSR	1276.64	4.23083	PTx-E6290	10	1.01044	0.095635
PTx-S1	171	181	TRANPNPYTSR	1276.64	4.21845	PTx-E6290	30	0.823389	0.089181	1.83383	0.151044	0.350451
PTx-S1	173	181	ANPNPYTSR	1019.49	4.61881	PTx	0	0	0
PTx-S1	173	181	ANPNPYTSR	1019.49	4.64058	PTx	10	1.42993	0.028253
PTx-S1	173	181	ANPNPYTSR	1019.49	4.61219	PTx	30	1.50581	0.028562	2.93574
PTx-S1	173	181	ANPNPYTSR	1019.49	4.61881	PTx-E6290	0	0	0
PTx-S1	173	181	ANPNPYTSR	1019.49	4.62639	PTx-E6290	10	1.27181	0.053655
PTx-S1	173	181	ANPNPYTSR	1019.49	4.61286	PTx-E6290	30	1.38971	0.151162	2.66152	0.274221	0.453486
PTx-S1	185	191	ASIVGTL	660.393	4.69869	PTx	0	0	0
PTx-S1	185	191	ASIVGTL	660.393	4.72455	PTx	10	0.368532	0.06664
PTx-S1	185	191	ASIVGTL	660.393	4.65822	PTx	30	0.455709	0.10411	0.824241
PTx-S1	185	191	ASIVGTL	660.393	4.69869	PTx-E6290	0	0	0
PTx-S1	185	191	ASIVGTL	660.393	4.67086	PTx-E6290	10	0.101067	0.102447
PTx-S1	185	191	ASIVGTL	660.393	4.66228	PTx-E6290	30	0.312018	0.142189	0.413085	0.411156	0.426567
PTx-S1	203	218	ARQAESSEAMAAWSER	1779.81	5.33346	PTx	0	0	0
PTx-S1	203	218	ARQAESSEAMAAWSER	1779.81	5.37388	PTx	10	2.11678	0.133468
PTx-S1	203	218	ARQAESSEAMAAWSER	1779.81	5.33955	PTx	30	2.36251	0.126867	4.47929
PTx-S1	203	218	ARQAESSEAMAAWSER	1779.81	5.33346	PTx-E6290	0	0	0
PTx-S1	203	218	ARQAESSEAMAAWSER	1779.81	5.36359	PTx-E6290	10	2.17267	0.085562
PTx-S1	203	218	ARQAESSEAMAAWSER	1779.81	5.33817	PTx-E6290	30	1.95039	0.262619	4.12307	0.356226	0.787857
PTx-S1	213	222	AAWSERAGEA	1047.49	5.20428	PTx	0	0	0
PTx-S1	213	222	AAWSERAGEA	1047.49	5.24282	PTx	10	3.25072	0.224902
PTx-S1	213	222	AAWSERAGEA	1047.49	5.21688	PTx	30	3.59811	0.154616	6.84883
PTx-S1	213	222	AAWSERAGEA	1047.49	5.20428	PTx-E6290	0	0	0
PTx-S1	213	222	AAWSERAGEA	1047.49	5.24637	PTx-E6290	10	3.38066	0.162489
PTx-S1	213	222	AAWSERAGEA	1047.49	5.21627	PTx-E6290	30	3.42695	0.209523	6.8076	0.041226	0.674706
PTx-S1	213	223	AAWSERAGEAM	1178.53	5.82654	PTx	0	0	0
PTx-S1	213	223	AAWSERAGEAM	1178.53	5.8645	PTx	10	4.3865	0.131019
PTx-S1	213	223	AAWSERAGEAM	1178.53	5.83275	PTx	30	4.49242	0.080561	8.87892
PTx-S1	213	223	AAWSERAGEAM	1178.53	5.82654	PTx-E6290	0	0	0
PTx-S1	213	223	AAWSERAGEAM	1178.53	5.85376	PTx-E6290	10	4.39341	0.060187
PTx-S1	213	223	AAWSERAGEAM	1178.53	5.83516	PTx-E6290	30	4.44001	0.021246	8.83342	0.0455	0.393057
PTx-S1	215	222	WSERAGEA	905.411	4.8055	PTx	0	0	0
PTx-S1	215	222	WSERAGEA	905.411	4.83846	PTx	10	2.19249	0.148111
PTx-S1	215	222	WSERAGEA	905.411	4.80562	PTx	30	2.38058	0.102289	4.57306
PTx-S1	215	222	WSERAGEA	905.411	4.8055	PTx-E6290	0	0	0
PTx-S1	215	222	WSERAGEA	905.411	4.8182	PTx-E6290	10	2.1966	0.10647
PTx-S1	215	222	WSERAGEA	905.411	4.80679	PTx-E6290	30	2.17768	0.104361	4.37428	0.198783	0.444333
PTx-S1	215	223	WSERAGEAM	1036.45	5.47901	PTx	0	0	0
PTx-S1	215	223	WSERAGEAM	1036.45	5.51938	PTx	10	2.72989	0.129418
PTx-S1	215	223	WSERAGEAM	1036.45	5.48697	PTx	30	2.98623	0.057117	5.71612
PTx-S1	215	223	WSERAGEAM	1036.45	5.47901	PTx-E6290	0	0	0
PTx-S1	215	223	WSERAGEAM	1036.45	5.5088	PTx-E6290	10	2.80526	0.070711
PTx-S1	215	223	WSERAGEAM	1036.45	5.4869	PTx-E6290	30	2.85389	0.078093	5.65916	0.056965	0.388254
PTx-S1	224	230	VLVYYES	872.44	6.65707	PTx	0	0	0
PTx-S1	224	230	VLVYYES	872.44	6.70367	PTx	10	0.751249	0.08657
PTx-S1	224	230	VLVYYES	872.44	6.66866	PTx	30	0.842673	0.02739	1.59392
PTx-S1	224	230	VLVYYES	872.44	6.65707	PTx-E6290	0	0	0
PTx-S1	224	230	VLVYYES	872.44	6.68875	PTx-E6290	10	0.786174	0.041899
PTx-S1	224	230	VLVYYES	872.44	6.66672	PTx-E6290	30	0.746076	0.063779	1.53225	0.061672	0.25971
PTx-S1	226	232	VYYESIA	844.409	6.55157	PTx	0	0	0
PTx-S1	226	232	VYYESIA	844.409	6.5994	PTx	10	0.217212	0.035033
PTx-S1	226	232	VYYESIA	844.409	6.56473	PTx	30	0.275038	0.019478	0.49225
PTx-S1	226	232	VYYESIA	844.409	6.55157	PTx-E6290	0	0	0
PTx-S1	226	232	VYYESIA	844.409	6.58557	PTx-E6290	10	0.181053	0.030908
PTx-S1	226	232	VYYESIA	844.409	6.56313	PTx-E6290	30	0.191898	0.048995	0.372951	0.119299	0.146985
PTx-S1	229	235	ESIAYSF	816.377	7.44947	PTx	0	0	0
PTx-S1	229	235	ESIAYSF	816.377	7.4879	PTx	10	1.26537	0.080437
PTx-S1	229	235	ESIAYSF	816.377	7.45501	PTx	30	1.62206	0.013854	2.88743
PTx-S1	229	235	ESIAYSF	816.377	7.44947	PTx-E6290	0	0	0
PTx-S1	229	235	ESIAYSF	816.377	7.47733	PTx-E6290	10	1.30915	0.050001
PTx-S1	229	235	ESIAYSF	816.377	7.45329	PTx-E6290	30	1.59079	0.069272	2.89994	-0.012513	0.241311
PTx-S2	1	11	STPGIVIPPQE	1137.62	6.24113	PTx	0	0	0
PTx-S2	1	11	STPGIVIPPQE	1137.62	6.28448	PTx	10	2.67519	0.043433
PTx-S2	1	11	STPGIVIPPQE	1137.62	6.2471	PTx	30	2.89684	0.111031	5.57204
PTx-S2	1	11	STPGIVIPPQE	1137.62	6.24113	PTx-E6290	0	0	0
PTx-S2	1	11	STPGIVIPPQE	1137.62	6.26775	PTx-E6290	10	2.65947	0.096354
PTx-S2	1	11	STPGIVIPPQE	1137.62	6.24827	PTx-E6290	30	2.70297	0.084145	5.36243	0.209606	0.333093
PTx-S2	1	12	STPGIVIPPQEQ	1265.67	6.1351	PTx	0	0	0
PTx-S2	1	12	STPGIVIPPQEQ	1265.67	6.17694	PTx	10	3.14555	0.068295
PTx-S2	1	12	STPGIVIPPQEQ	1265.67	6.14267	PTx	30	3.43719	0.024088	6.58274
PTx-S2	1	12	STPGIVIPPQEQ	1265.67	6.1351	PTx-E6290	0	0	0
PTx-S2	1	12	STPGIVIPPQEQ	1265.67	6.16209	PTx-E6290	10	2.9004	0.056765
PTx-S2	1	12	STPGIVIPPQEQ	1265.67	6.14237	PTx-E6290	30	3.07526	0.17017	5.97566	0.607085	0.51051
PTx-S2	7	13	IPPQEQI	824.451	5.89486	PTx	0	0	0
PTx-S2	7	13	IPPQEQI	824.451	5.9398	PTx	10	1.04012	0.025494
PTx-S2	7	13	IPPQEQI	824.451	5.90721	PTx	30	1.19503	0.009293	2.23514
PTx-S2	7	13	IPPQEQI	824.451	5.89486	PTx-E6290	0	0	0
PTx-S2	7	13	IPPQEQI	824.451	5.92664	PTx-E6290	10	0.964006	0.050764
PTx-S2	7	13	IPPQEQI	824.451	5.90451	PTx-E6290	30	1.00293	0.078731	1.96693	0.268209	0.236193
PTx-S2	7	20	IPPQEQITQHGSPY	1594.79	7.83331	PTx	0	0	0
PTx-S2	7	20	IPPQEQITQHGSPY	1594.79	7.86416	PTx	10	3.60379	0.238429
PTx-S2	7	20	IPPQEQITQHGSPY	1594.79	7.83504	PTx	30	3.64048	0.111466	7.24427
PTx-S2	7	20	IPPQEQITQHGSPY	1594.79	7.83331	PTx-E6290	0	0	0
PTx-S2	7	20	IPPQEQITQHGSPY	1594.79	7.85931	PTx-E6290	10	3.28693	0.127615
PTx-S2	7	20	IPPQEQITQHGSPY	1594.79	7.83343	PTx-E6290	30	3.4239	0.104808	6.71083	0.533437	0.715287
PTx-S2	22	31	RCANKTRALT	1133.62	7.36079	PTx	0	0	0
PTx-S2	22	31	RCANKTRALT	1133.62	7.387	PTx	10	0.075454	0.184664
PTx-S2	22	31	RCANKTRALT	1133.62	7.38407	PTx	30	0.140807	0.130059	0.216261
PTx-S2	22	31	RCANKTRALT	1133.62	7.3605	PTx-E6290	0	0	0
PTx-S2	22	31	RCANKTRALT	1133.62	7.39023	PTx-E6290	10	0.134332	0.16312
PTx-S2	22	31	RCANKTRALT	1133.62	7.37796	PTx-E6290	30	0.099085	0.146293	0.233417	-0.017156	0.553992
PTx-S2	32	43	VAELRGSGDLQE	1273.64	5.30277	PTx	0	0	0
PTx-S2	32	43	VAELRGSGDLQE	1273.64	5.34356	PTx	10	2.03433	0.155649
PTx-S2	32	43	VAELRGSGDLQE	1273.64	5.31037	PTx	30	2.58101	0.079563	4.61534
PTx-S2	32	43	VAELRGSGDLQE	1273.64	5.30277	PTx-E6290	0	0	0
PTx-S2	32	43	VAELRGSGDLQE	1273.64	5.33627	PTx-E6290	10	1.96666	0.091745
PTx-S2	32	43	VAELRGSGDLQE	1273.64	5.31001	PTx-E6290	30	2.31481	0.099694	4.28147	0.33387	0.466947
PTx-S2	34	43	ELRGSGDLQE	1103.53	4.93612	PTx	0	0	0
PTx-S2	34	43	ELRGSGDLQE	1103.53	4.97575	PTx	10	1.87537	0.117954
PTx-S2	34	43	ELRGSGDLQE	1103.53	4.94834	PTx	30	2.32982	0.04259	4.20519
PTx-S2	34	43	ELRGSGDLQE	1103.53	4.93612	PTx-E6290	0	0	0
PTx-S2	34	43	ELRGSGDLQE	1103.53	4.96218	PTx-E6290	10	1.77093	0.088788
PTx-S2	34	43	ELRGSGDLQE	1103.53	4.94846	PTx-E6290	30	1.95089	0.203536	3.72182	0.483366	0.610608
PTx-S2	35	41	LRGSGDL	717.389	4.6496	PTx	0	0	0
PTx-S2	35	41	LRGSGDL	717.389	4.68129	PTx	10	1.39417	0.062984
PTx-S2	35	41	LRGSGDL	717.389	4.65183	PTx	30	1.54557	0.068662	2.93974
PTx-S2	35	41	LRGSGDL	717.389	4.6496	PTx-E6290	0	0	0
PTx-S2	35	41	LRGSGDL	717.389	4.66391	PTx-E6290	10	1.2689	0.189627
PTx-S2	35	41	LRGSGDL	717.389	4.65473	PTx-E6290	30	1.48726	0.104898	2.75616	0.183581	0.568881
PTx-S2	35	43	LRGSGDLQE	974.49	4.67177	PTx	0	0	0
PTx-S2	35	43	LRGSGDLQE	974.49	4.69503	PTx	10	1.8897	0.094685
PTx-S2	35	43	LRGSGDLQE	974.49	4.66141	PTx	30	2.38273	0.090985	4.27243
PTx-S2	35	43	LRGSGDLQE	974.49	4.67177	PTx-E6290	0	0	0
PTx-S2	35	43	LRGSGDLQE	974.49	4.67446	PTx-E6290	10	1.84426	0.073638
PTx-S2	35	43	LRGSGDLQE	974.49	4.66281	PTx-E6290	30	2.13523	0.127524	3.97949	0.292943	0.382572
PTx-S2	36	43	RGSGDLQE	861.406	4.2	PTx	0	0	0
PTx-S2	36	43	RGSGDLQE	861.406	4.24533	PTx	10	1.56696	0.03893
PTx-S2	36	43	RGSGDLQE	861.406	4.2153	PTx	30	1.84695	0.057592	3.41391
PTx-S2	36	43	RGSGDLQE	861.406	4.2	PTx-E6290	0	0	0
PTx-S2	36	43	RGSGDLQE	861.406	4.23069	PTx-E6290	10	1.52579	0.042947
PTx-S2	36	43	RGSGDLQE	861.406	4.21557	PTx-E6290	30	1.70456	0.057606	3.23035	0.183554	0.172818
PTx-S2	43	55	EYLRHVTRGWSIF	1663.87	6.64479	PTx	0	0	0
PTx-S2	43	55	EYLRHVTRGWSIF	1663.87	6.69328	PTx	10	3.00148	0.083747
PTx-S2	43	55	EYLRHVTRGWSIF	1663.87	6.6642	PTx	30	3.24617	0.130483	6.24765
PTx-S2	43	55	EYLRHVTRGWSIF	1663.87	6.64479	PTx-E6290	0	0	0
PTx-S2	43	55	EYLRHVTRGWSIF	1663.87	6.68412	PTx-E6290	10	2.96878	0.082611
PTx-S2	43	55	EYLRHVTRGWSIF	1663.87	6.66008	PTx-E6290	30	2.96143	0.169169	5.93022	0.317432	0.507507
PTx-S2	44	52	YLRHVTRGW	1187.64	4.88674	PTx	0	0	0
PTx-S2	44	52	YLRHVTRGW	1187.64	4.92472	PTx	10	2.18423	0.039736
PTx-S2	44	52	YLRHVTRGW	1187.64	4.88599	PTx	30	2.37529	0.040323	4.55952
PTx-S2	44	52	YLRHVTRGW	1187.64	4.88674	PTx-E6290	0	0	0
PTx-S2	44	52	YLRHVTRGW	1187.64	4.89668	PTx-E6290	10	2.12023	0.055356
PTx-S2	44	52	YLRHVTRGW	1187.64	4.89245	PTx-E6290	30	2.14668	0.081687	4.2669	0.292613	0.245061
PTx-S2	44	55	YLRHVTRGWSIF	1534.83	6.43313	PTx	0	0	0
PTx-S2	44	55	YLRHVTRGWSIF	1534.83	6.48304	PTx	10	2.80226	0.100155
PTx-S2	44	55	YLRHVTRGWSIF	1534.83	6.45114	PTx	30	3.09636	0.043377	5.89863
PTx-S2	44	55	YLRHVTRGWSIF	1534.83	6.43313	PTx-E6290	0	0	0
PTx-S2	44	55	YLRHVTRGWSIF	1534.83	6.47345	PTx-E6290	10	2.81859	0.056854
PTx-S2	44	55	YLRHVTRGWSIF	1534.83	6.44829	PTx-E6290	30	2.84588	0.096332	5.66447	0.234158	0.300465
PTx-S2	45	52	LRHVTRGW	1024.58	4.6578	PTx	0	0	0
PTx-S2	45	52	LRHVTRGW	1024.58	4.8808	PTx	10	1.71846	0.113901
PTx-S2	45	52	LRHVTRGW	1024.58	4.88568	PTx	30	1.92022	0.117521	3.63868
PTx-S2	45	52	LRHVTRGW	1024.58	4.6578	PTx-E6290	0	0	0
PTx-S2	45	52	LRHVTRGW	1024.58	4.69021	PTx-E6290	10	1.69062	0.234061
PTx-S2	45	52	LRHVTRGW	1024.58	4.89039	PTx-E6290	30	1.55606	0.193469	3.24668	0.392002	0.702183
PTx-S2	46	52	RHVTRGW	911.496	4.7142	PTx	0	0	0
PTx-S2	46	52	RHVTRGW	911.496	4.74509	PTx	10	0.259946	0.068594
PTx-S2	46	52	RHVTRGW	911.496	4.70334	PTx	30	0.187366	0.022601	0.447312
PTx-S2	46	52	RHVTRGW	911.496	4.7142	PTx-E6290	0	0	0
PTx-S2	46	52	RHVTRGW	911.496	4.71525	PTx-E6290	10	0.185214	0.052034
PTx-S2	46	52	RHVTRGW	911.496	4.70366	PTx-E6290	30	0.120056	0.041603	0.30527	0.142042	0.205782
PTx-S2	56	72	ALYDGTYLGGEYGGVIK	1775.88	6.99822	PTx	0	0	0
PTx-S2	56	72	ALYDGTYLGGEYGGVIK	1775.88	7.03826	PTx	10	2.71032	0.16712
PTx-S2	56	72	ALYDGTYLGGEYGGVIK	1775.88	7.00116	PTx	30	3.01458	0.041312	5.7249
PTx-S2	56	72	ALYDGTYLGGEYGGVIK	1775.88	6.99822	PTx-E6290	0	0	0
PTx-S2	56	72	ALYDGTYLGGEYGGVIK	1775.88	7.02197	PTx-E6290	10	2.65146	0.053157
PTx-S2	56	72	ALYDGTYLGGEYGGVIK	1775.88	6.99916	PTx-E6290	30	2.7934	0.105492	5.44486	0.280039	0.50136
PTx-S2	58	67	YDGTYLGGEY	1137.47	7.06173	PTx	0	0	0
PTx-S2	58	67	YDGTYLGGEY	1137.47	7.10164	PTx	10	1.54553	0.156576
PTx-S2	58	67	YDGTYLGGEY	1137.47	7.06772	PTx	30	1.70393	0.153209	3.24946
PTx-S2	58	67	YDGTYLGGEY	1137.47	7.06173	PTx-E6290	0	0	0
PTx-S2	58	67	YDGTYLGGEY	1137.47	7.08522	PTx-E6290	10	1.54159	0.168618
PTx-S2	58	67	YDGTYLGGEY	1137.47	7.06506	PTx-E6290	30	1.60263	0.171841	3.14422	0.105238	0.515523
PTx-S2	58	72	YDGTYLGGEYGGVIK	1591.76	6.59146	PTx	0	0	0
PTx-S2	58	72	YDGTYLGGEYGGVIK	1591.76	6.63542	PTx	10	2.4745	0.173397
PTx-S2	58	72	YDGTYLGGEYGGVIK	1591.76	6.60004	PTx	30	2.69631	0.072486	5.1708
PTx-S2	58	72	YDGTYLGGEYGGVIK	1591.76	6.59146	PTx-E6290	0	0	0
PTx-S2	58	72	YDGTYLGGEYGGVIK	1591.76	6.62058	PTx-E6290	10	2.41305	0.094963
PTx-S2	58	72	YDGTYLGGEYGGVIK	1591.76	6.59884	PTx-E6290	30	2.56704	0.083993	4.98009	0.190716	0.520191
PTx-S2	58	80	YDGTYLGGEYGGVIKDGTPGGAF	2294.06	7.23744	PTx	0	0	0
PTx-S2	58	80	YDGTYLGGEYGGVIKDGTPGGAF	2294.06	7.27121	PTx	10	4.00435	0.274467
PTx-S2	58	80	YDGTYLGGEYGGVIKDGTPGGAF	2294.06	7.23649	PTx	30	4.74068	0.082939	8.74503
PTx-S2	58	80	YDGTYLGGEYGGVIKDGTPGGAF	2294.06	7.23744	PTx-E6290	0	0	0
PTx-S2	58	80	YDGTYLGGEYGGVIKDGTPGGAF	2294.06	7.25646	PTx-E6290	10	4.07843	0.080256
PTx-S2	58	80	YDGTYLGGEYGGVIKDGTPGGAF	2294.06	7.23391	PTx-E6290	30	4.47953	0.103149	8.55796	0.187068	0.823401
PTx-S2	60	72	GTYLGGEYGGVIK	1313.67	6.23385	PTx	0	0	0
PTx-S2	60	72	GTYLGGEYGGVIK	1313.67	6.27717	PTx	10	2.61711	0.123402
PTx-S2	60	72	GTYLGGEYGGVIK	1313.67	6.24172	PTx	30	2.90788	0.045545	5.52499
PTx-S2	60	72	GTYLGGEYGGVIK	1313.67	6.23385	PTx-E6290	0	0	0
PTx-S2	60	72	GTYLGGEYGGVIK	1313.67	6.26272	PTx-E6290	10	2.53537	0.066925
PTx-S2	60	72	GTYLGGEYGGVIK	1313.67	6.24165	PTx-E6290	30	2.68538	0.140421	5.22075	0.304246	0.421263
PTx-S2	60	80	GTYLGGEYGGVIKDGTPGGAF	2015.97	6.97497	PTx	0	0	0
PTx-S2	60	80	GTYLGGEYGGVIKDGTPGGAF	2015.97	7.00906	PTx	10	4.17214	0.221071
PTx-S2	60	80	GTYLGGEYGGVIKDGTPGGAF	2015.97	6.9791	PTx	30	4.76957	0.07709	8.94171
PTx-S2	60	80	GTYLGGEYGGVIKDGTPGGAF	2015.97	6.97497	PTx-E6290	0	0	0
PTx-S2	60	80	GTYLGGEYGGVIKDGTPGGAF	2015.97	6.99638	PTx-E6290	10	4.04339	0.048446
PTx-S2	60	80	GTYLGGEYGGVIKDGTPGGAF	2015.97	6.97816	PTx-E6290	30	4.3305	0.093682	8.37389	0.567823	0.663213
PTx-S2	69	93	GVIKDGTPGGAFDLKTTFCIMTTRN	2643.33	6.87859	PTx	0	0	0
PTx-S2	69	93	GVIKDGTPGGAFDLKTTFCIMTTRN	2643.33	6.9124	PTx	10	4.8444	0.054312
PTx-S2	69	93	GVIKDGTPGGAFDLKTTFCIMTTRN	2643.33	6.88217	PTx	30	5.29141	0.049915	10.1358
PTx-S2	69	93	GVIKDGTPGGAFDLKTTFCIMTTRN	2643.33	6.87859	PTx-E6290	0	0	0
PTx-S2	69	93	GVIKDGTPGGAFDLKTTFCIMTTRN	2643.33	6.89742	PTx-E6290	10	4.85163	0.070917
PTx-S2	69	93	GVIKDGTPGGAFDLKTTFCIMTTRN	2643.33	6.88091	PTx-E6290	30	5.23079	0.132139	10.0824	0.053387	0.396417
PTx-S2	73	80	DGTPGGAF	721.315	6.40732	PTx	0	0	0
PTx-S2	73	80	DGTPGGAF	721.315	6.44909	PTx	10	0.651943	0.035631
PTx-S2	73	80	DGTPGGAF	721.315	6.41086	PTx	30	0.863419	0.036868	1.51536
PTx-S2	73	80	DGTPGGAF	721.315	6.40732	PTx-E6290	0	0	0
PTx-S2	73	80	DGTPGGAF	721.315	6.4329	PTx-E6290	10	0.558647	0.026742
PTx-S2	73	80	DGTPGGAF	721.315	6.41061	PTx-E6290	30	0.653981	0.050084	1.21263	0.302734	0.150252
PTx-S2	73	81	DGTPGGAFD	836.342	6.26357	PTx	0	0	0
PTx-S2	73	81	DGTPGGAFD	836.342	6.30481	PTx	10	0.880009	0.057924
PTx-S2	73	81	DGTPGGAFD	836.342	6.26641	PTx	30	0.998168	0.030728	1.87818
PTx-S2	73	81	DGTPGGAFD	836.342	6.26357	PTx-E6290	0	0	0
PTx-S2	73	81	DGTPGGAFD	836.342	6.28827	PTx-E6290	10	0.758777	0.070644
PTx-S2	73	81	DGTPGGAFD	836.342	6.27012	PTx-E6290	30	0.869566	0.019039	1.62834	0.249834	0.211932
PTx-S2	81	87	DLKTTFC	827.397	6.40603	PTx	0	0	0
PTx-S2	81	87	DLKTTFC	827.397	6.44454	PTx	10	1.6794	0.075868
PTx-S2	81	87	DLKTTFC	827.397	6.40808	PTx	30	2.05404	0.113215	3.73344
PTx-S2	81	87	DLKTTFC	827.397	6.40603	PTx-E6290	0	0	0
PTx-S2	81	87	DLKTTFC	827.397	6.43112	PTx-E6290	10	1.59382	0.180081
PTx-S2	81	87	DLKTTFC	827.397	6.40965	PTx-E6290	30	1.9716	0.075114	3.56541	0.168027	0.540243
PTx-S2	90	105	TTRNTGQPATDHYYSN	1825.81	4.51923	PTx	0	0	0
PTx-S2	90	105	TTRNTGQPATDHYYSN	1825.81	4.5416	PTx	10	3.51027	0.091643
PTx-S2	90	105	TTRNTGQPATDHYYSN	1825.81	4.50574	PTx	30	3.88599	0.056068	7.39626
PTx-S2	90	105	TTRNTGQPATDHYYSN	1825.81	4.51923	PTx-E6290	0	0	0
PTx-S2	90	105	TTRNTGQPATDHYYSN	1825.81	4.51858	PTx-E6290	10	3.55503	0.138224
PTx-S2	90	105	TTRNTGQPATDHYYSN	1825.81	4.50341	PTx-E6290	30	3.39828	0.232295	6.95331	0.442957	0.696885
PTx-S2	90	108	TTRNTGQPATDHYYSNVTA	2096.96	5.11533	PTx	0	0	0
PTx-S2	90	108	TTRNTGQPATDHYYSNVTA	2096.96	5.15816	PTx	10	3.80294	0.113429
PTx-S2	90	108	TTRNTGQPATDHYYSNVTA	2096.96	5.13997	PTx	30	3.94114	0.128074	7.74408
PTx-S2	90	108	TTRNTGQPATDHYYSNVTA	2096.96	5.11533	PTx-E6290	0	0	0
PTx-S2	90	108	TTRNTGQPATDHYYSNVTA	2096.96	5.1759	PTx-E6290	10	3.73238	0.061069
PTx-S2	90	108	TTRNTGQPATDHYYSNVTA	2096.96	5.14253	PTx-E6290	30	3.63164	0.026183	7.36403	0.380052	0.384222
PTx-S2	93	105	NTGQPATDHYYSN	1467.61	4.89402	PTx	0	0	0
PTx-S2	93	105	NTGQPATDHYYSN	1467.61	4.92977	PTx	10	2.61017	0.070725
PTx-S2	93	105	NTGQPATDHYYSN	1467.61	4.90079	PTx	30	2.77332	0.063609	5.38349
PTx-S2	93	105	NTGQPATDHYYSN	1467.61	4.89402	PTx-E6290	0	0	0
PTx-S2	93	105	NTGQPATDHYYSN	1467.61	4.91336	PTx-E6290	10	2.54169	0.086017
PTx-S2	93	105	NTGQPATDHYYSN	1467.61	4.90099	PTx-E6290	30	2.57674	0.262497	5.11843	0.265063	0.787491
PTx-S2	103	111	YSNVTATRL	1024.54	5.4421	PTx	0	0	0
PTx-S2	103	111	YSNVTATRL	1024.54	5.48508	PTx	10	0.60777	0.113407
PTx-S2	103	111	YSNVTATRL	1024.54	5.45058	PTx	30	0.885957	0.067964	1.49373
PTx-S2	103	111	YSNVTATRL	1024.54	5.4421	PTx-E6290	0	0	0
PTx-S2	103	111	YSNVTATRL	1024.54	5.47509	PTx-E6290	10	0.577275	0.054877
PTx-S2	103	111	YSNVTATRL	1024.54	5.4525	PTx-E6290	30	0.645941	0.16717	1.22322	0.270511	0.50151
PTx-S2	109	119	TRLLSSTNSRL	1247.71	5.11645	PTx	0	0	0
PTx-S2	109	119	TRLLSSTNSRL	1247.71	5.16587	PTx	10	1.46089	0.124867
PTx-S2	109	119	TRLLSSTNSRL	1247.71	5.15785	PTx	30	1.32603	0.136409	2.78692
PTx-S2	109	119	TRLLSSTNSRL	1247.71	5.11645	PTx-E6290	0	0	0
PTx-S2	109	119	TRLLSSTNSRL	1247.71	5.19094	PTx-E6290	10	1.16118	0.211343
PTx-S2	109	119	TRLLSSTNSRL	1247.71	5.15183	PTx-E6290	30	1.30721	0.039727	2.46839	0.318535	0.634029
PTx-S2	112	119	LSSTNSRL	877.474	4.58246	PTx	0	0	0
PTx-S2	112	119	LSSTNSRL	877.474	4.60498	PTx	10	1.45374	0.137331
PTx-S2	112	119	LSSTNSRL	877.474	4.55096	PTx	30	1.59258	0.120777	3.04632
PTx-S2	112	119	LSSTNSRL	877.474	4.58246	PTx-E6290	0	0	0
PTx-S2	112	119	LSSTNSRL	877.474	4.56297	PTx-E6290	10	1.3576	0.129911
PTx-S2	112	119	LSSTNSRL	877.474	4.55377	PTx-E6290	30	1.3177	0.1331	2.6753	0.371018	0.411993
PTx-S2	112	121	LSSTNSRLCA	1051.52	4.90278	PTx	0	0	0
PTx-S2	112	121	LSSTNSRLCA	1051.52	4.9445	PTx	10	1.66806	0.135826
PTx-S2	112	121	LSSTNSRLCA	1051.52	4.91187	PTx	30	1.75304	0.146218	3.4211
PTx-S2	112	121	LSSTNSRLCA	1051.52	4.90278	PTx-E6290	0	0	0
PTx-S2	112	121	LSSTNSRLCA	1051.52	4.9234	PTx-E6290	10	1.62691	0.174276
PTx-S2	112	121	LSSTNSRLCA	1051.52	4.91379	PTx-E6290	30	1.4355	0.191146	3.06241	0.358693	0.573438
PTx-S2	112	123	LSSTNSRLCAVF	1297.66	6.76476	PTx	0	0	0
PTx-S2	112	123	LSSTNSRLCAVF	1297.66	6.81192	PTx	10	1.08609	0.096871
PTx-S2	112	123	LSSTNSRLCAVF	1297.66	6.78221	PTx	30	1.2603	0.075067	2.34639
PTx-S2	112	123	LSSTNSRLCAVF	1297.66	6.76476	PTx-E6290	0	0	0
PTx-S2	112	123	LSSTNSRLCAVF	1297.66	6.80073	PTx-E6290	10	1.15019	0.064559
PTx-S2	112	123	LSSTNSRLCAVF	1297.66	6.78167	PTx-E6290	30	1.24088	0.047462	2.39107	-0.044681	0.290613
PTx-S2	124	142	VRSGQPVIGACTSPYDGKY	1997.97	5.87409	PTx	0	0	0
PTx-S2	124	142	VRSGQPVIGACTSPYDGKY	1997.97	5.91561	PTx	10	3.76788	0.235644
PTx-S2	124	142	VRSGQPVIGACTSPYDGKY	1997.97	5.88394	PTx	30	4.20615	0.177334	7.97404
PTx-S2	124	142	VRSGQPVIGACTSPYDGKY	1997.97	5.87409	PTx-E6290	0	0	0
PTx-S2	124	142	VRSGQPVIGACTSPYDGKY	1997.97	5.90502	PTx-E6290	10	3.63124	0.043156
PTx-S2	124	142	VRSGQPVIGACTSPYDGKY	1997.97	5.88288	PTx-E6290	30	3.90239	0.129749	7.53363	0.440407	0.706932
PTx-S2	126	132	SGQPVIG	657.357	5.25041	PTx	0	0	0
PTx-S2	126	132	SGQPVIG	657.357	5.29511	PTx	10	0.510933	0.012499
PTx-S2	126	132	SGQPVIG	657.357	5.2628	PTx	30	0.508638	0.019795	1.01957
PTx-S2	126	132	SGQPVIG	657.357	5.25041	PTx-E6290	0	0	0
PTx-S2	126	132	SGQPVIG	657.357	5.28895	PTx-E6290	10	0.508972	0.049377
PTx-S2	126	132	SGQPVIG	657.357	5.26518	PTx-E6290	30	0.507137	0.010925	1.01611	0.003462	0.148131
PTx-S2	127	142	GQPVIGACTSPYDGKY	1655.77	6.23936	PTx	0	0	0
PTx-S2	127	142	GQPVIGACTSPYDGKY	1655.77	6.28366	PTx	10	2.79226	0.110569
PTx-S2	127	142	GQPVIGACTSPYDGKY	1655.77	6.24895	PTx	30	2.9351	0.053489	5.72736
PTx-S2	127	142	GQPVIGACTSPYDGKY	1655.77	6.23936	PTx-E6290	0	0	0
PTx-S2	127	142	GQPVIGACTSPYDGKY	1655.77	6.26933	PTx-E6290	10	2.74557	0.058044
PTx-S2	127	142	GQPVIGACTSPYDGKY	1655.77	6.24986	PTx-E6290	30	2.78169	0.092136	5.52726	0.200107	0.331707
PTx-S2	128	134	QPVIGAC	687.349	7.25995	PTx	0	0	0
PTx-S2	128	134	QPVIGAC	687.349	7.30253	PTx	10	1.22053	0.059337
PTx-S2	128	134	QPVIGAC	687.349	7.26891	PTx	30	1.58751	0.025477	2.80804
PTx-S2	128	134	QPVIGAC	687.349	7.25995	PTx-E6290	0	0	0
PTx-S2	128	134	QPVIGAC	687.349	7.28879	PTx-E6290	10	1.24057	0.042033
PTx-S2	128	134	QPVIGAC	687.349	7.26572	PTx-E6290	30	1.48963	0.06892	2.73021	0.077835	0.20676
PTx-S2	146	153	YSRLRKML	1066.62	4.78053	PTx	0	0	0
PTx-S2	146	153	YSRLRKML	1066.62	4.81212	PTx	10	0.191012	0.068346
PTx-S2	146	153	YSRLRKML	1066.62	4.752	PTx	30	0.155686	0.072844	0.346698
PTx-S2	146	153	YSRLRKML	1066.62	4.78053	PTx-E6290	0	0	0
PTx-S2	146	153	YSRLRKML	1066.62	4.76456	PTx-E6290	10	-0.005372	0.076806
PTx-S2	146	153	YSRLRKML	1066.62	4.75199	PTx-E6290	30	-0.022558	0.102926	-0.02793	0.374628	0.308778
PTx-S2	146	155	YSRLRKMLYL	1342.77	5.94035	PTx	0	0	0
PTx-S2	146	155	YSRLRKMLYL	1342.77	5.98877	PTx	10	0.178047	0.052655
PTx-S2	146	155	YSRLRKMLYL	1342.77	5.95958	PTx	30	0.162718	0.065098	0.340765
PTx-S2	146	155	YSRLRKMLYL	1342.77	5.94035	PTx-E6290	0	0	0
PTx-S2	146	155	YSRLRKMLYL	1342.77	5.97954	PTx-E6290	10	0.006048	0.048375
PTx-S2	146	155	YSRLRKMLYL	1342.77	5.95613	PTx-E6290	30	-0.031781	0.102688	-0.025733	0.366498	0.308064
PTx-S2	149	155	LRKMLYL	936.57	5.97643	PTx	0	0	0
PTx-S2	149	155	LRKMLYL	936.57	6.0321	PTx	10	0.075937	0.067905
PTx-S2	149	155	LRKMLYL	936.57	5.99664	PTx	30	0.082835	0.07432	0.158772
PTx-S2	149	155	LRKMLYL	936.57	5.97643	PTx-E6290	0	0	0
PTx-S2	149	155	LRKMLYL	936.57	6.01908	PTx-E6290	10	-0.013002	0.153691
PTx-S2	149	155	LRKMLYL	936.57	5.99266	PTx-E6290	30	-0.122194	0.078394	-0.135196	0.293968	0.461073
PTx-S2	155	162	LIYVAGIS	835.492	7.11182	PTx	0	0	0
PTx-S2	155	162	LIYVAGIS	835.492	7.15311	PTx	10	0.732808	0.021576
PTx-S2	155	162	LIYVAGIS	835.492	7.11953	PTx	30	0.867897	0.023445	1.60071
PTx-S2	155	162	LIYVAGIS	835.492	7.11182	PTx-E6290	0	0	0
PTx-S2	155	162	LIYVAGIS	835.492	7.13736	PTx-E6290	10	0.674466	0.100221
PTx-S2	155	162	LIYVAGIS	835.492	7.11894	PTx-E6290	30	0.642278	0.04619	1.31674	0.283961	0.300663
PTx-S2	155	163	LIYVAGISV	934.561	7.96448	PTx	0	0	0
PTx-S2	155	163	LIYVAGISV	934.561	8.00545	PTx	10	0.834795	0.03947
PTx-S2	155	163	LIYVAGISV	934.561	7.96938	PTx	30	0.989189	0.063242	1.82398
PTx-S2	155	163	LIYVAGISV	934.561	7.96448	PTx-E6290	0	0	0
PTx-S2	155	163	LIYVAGISV	934.561	7.99359	PTx-E6290	10	0.703386	0.053114
PTx-S2	155	163	LIYVAGISV	934.561	7.96707	PTx-E6290	30	0.950422	0.041487	1.65381	0.170176	0.189726
PTx-S2	156	163	IYVAGISV	821.477	7.59638	PTx	0	0	0
PTx-S2	156	163	IYVAGISV	821.477	7.63538	PTx	10	0.670402	0.06187
PTx-S2	156	163	IYVAGISV	821.477	7.60056	PTx	30	0.793387	0.032017	1.46379
PTx-S2	156	163	IYVAGISV	821.477	7.59638	PTx-E6290	0	0	0
PTx-S2	156	163	IYVAGISV	821.477	7.62215	PTx-E6290	10	0.601835	0.038694
PTx-S2	156	163	IYVAGISV	821.477	7.5976	PTx-E6290	30	0.671311	0.037386	1.27315	0.190643	0.18561
PTx-S2	162	168	SVRVHVS	783.447	4.71713	PTx	0	0	0
PTx-S2	162	168	SVRVHVS	783.447	4.74991	PTx	10	0.278587	0.121817
PTx-S2	162	168	SVRVHVS	783.447	4.70251	PTx	30	0.216884	0.119584	0.495471
PTx-S2	162	168	SVRVHVS	783.447	4.71713	PTx-E6290	0	0	0
PTx-S2	162	168	SVRVHVS	783.447	4.62026	PTx-E6290	10	0.153464	0.094877
PTx-S2	162	168	SVRVHVS	783.447	4.70248	PTx-E6290	30	0.179969	0.103913	0.333433	0.162038	0.365451
PTx-S2	182	190	ETYALTGIS	954.478	6.81083	PTx	0	0	0
PTx-S2	182	190	ETYALTGIS	954.478	6.85235	PTx	10	0.35139	0.059139
PTx-S2	182	190	ETYALTGIS	954.478	6.82202	PTx	30	0.266083	0.026097	0.617473
PTx-S2	182	190	ETYALTGIS	954.478	6.81083	PTx-E6290	0	0	0
PTx-S2	182	190	ETYALTGIS	954.478	6.83774	PTx-E6290	10	0.215594	0.042738
PTx-S2	182	190	ETYALTGIS	954.478	6.82001	PTx-E6290	30	0.22893	0.050063	0.444524	0.172949	0.177417
PTx-S2	185	199	ALTGISICNPGSSLC	1435.69	7.69413	PTx	0	0	0
PTx-S2	185	199	ALTGISICNPGSSLC	1435.69	7.73463	PTx	10	2.82918	0.079479
PTx-S2	185	199	ALTGISICNPGSSLC	1435.69	7.69357	PTx	30	3.01291	0.152619	5.84209
PTx-S2	185	199	ALTGISICNPGSSLC	1435.69	7.69413	PTx-E6290	0	0	0
PTx-S2	185	199	ALTGISICNPGSSLC	1435.69	7.71682	PTx-E6290	10	2.7465	0.142103
PTx-S2	185	199	ALTGISICNPGSSLC	1435.69	7.69188	PTx-E6290	30	2.86554	0.262348	5.61204	0.230047	0.787044
PTx-S2	187	199	TGISICNPGSSLC	1251.57	7.35735	PTx	0	0	0
PTx-S2	187	199	TGISICNPGSSLC	1251.57	7.39396	PTx	10	3.24293	0.167315
PTx-S2	187	199	TGISICNPGSSLC	1251.57	7.35853	PTx	30	3.41101	0.121893	6.65394
PTx-S2	187	199	TGISICNPGSSLC	1251.57	7.35735	PTx-E6290	0	0	0
PTx-S2	187	199	TGISICNPGSSLC	1251.57	7.37893	PTx-E6290	10	3.25263	0.220232
PTx-S2	187	199	TGISICNPGSSLC	1251.57	7.35725	PTx-E6290	30	3.23328	0.199667	6.48591	0.168034	0.660696
PTx-S2	189	195	ISICNPG	703.344	6.46784	PTx	0	0	0
PTx-S2	189	195	ISICNPG	703.344	6.5174	PTx	10	0.07025	0.010601
PTx-S2	189	195	ISICNPG	703.344	6.48231	PTx	30	0.049141	0.014554	0.119391
PTx-S2	189	195	ISICNPG	703.344	6.46784	PTx-E6290	0	0	0
PTx-S2	189	195	ISICNPG	703.344	6.50365	PTx-E6290	10	0.090908	0.026527
PTx-S2	189	195	ISICNPG	703.344	6.47908	PTx-E6290	30	0.068493	0.011397	0.159401	-0.04001	0.079581
PTx-S2	189	199	ISICNPGSSLC	1093.5	7.18759	PTx	0	0	0
PTx-S2	189	199	ISICNPGSSLC	1093.5	7.22444	PTx	10	3.13511	0.064697
PTx-S2	189	199	ISICNPGSSLC	1093.5	7.19013	PTx	30	3.34969	0.022461	6.4848
PTx-S2	189	199	ISICNPGSSLC	1093.5	7.18759	PTx-E6290	0	0	0
PTx-S2	189	199	ISICNPGSSLC	1093.5	7.20618	PTx-E6290	10	3.10618	0.019548
PTx-S2	189	199	ISICNPGSSLC	1093.5	7.18807	PTx-E6290	30	3.08116	0.069539	6.18734	0.297459	0.208617
PTx-S2	191	199	ICNPGSSLC	893.385	6.35565	PTx	0	0	0
PTx-S2	191	199	ICNPGSSLC	893.385	6.39853	PTx	10	2.24103	0.054073
PTx-S2	191	199	ICNPGSSLC	893.385	6.36328	PTx	30	2.4227	0.042134	4.66373
PTx-S2	191	199	ICNPGSSLC	893.385	6.35565	PTx-E6290	0	0	0
PTx-S2	191	199	ICNPGSSLC	893.385	6.3841	PTx-E6290	10	2.25668	0.057433
PTx-S2	191	199	ICNPGSSLC	893.385	6.36332	PTx-E6290	30	2.22575	0.097095	4.48243	0.181302	0.291285
PTx-S3	1	12	VAPGIVIPPKAL	1174.76	6.19435	PTx	0	0	0
PTx-S3	1	12	VAPGIVIPPKAL	1174.76	6.23842	PTx	10	3.13662	0.045959
PTx-S3	1	12	VAPGIVIPPKAL	1174.76	6.20207	PTx	30	3.49158	0.021038	6.6282
PTx-S3	1	12	VAPGIVIPPKAL	1174.76	6.19435	PTx-E6290	0	0	0
PTx-S3	1	12	VAPGIVIPPKAL	1174.76	6.22296	PTx-E6290	10	3.13963	0.046961
PTx-S3	1	12	VAPGIVIPPKAL	1174.76	6.20264	PTx-E6290	30	3.32505	0.105721	6.46468	0.163512	0.317163
PTx-S3	1	13	VAPGIVIPPKALF	1321.82	7.14077	PTx	0	0	0
PTx-S3	1	13	VAPGIVIPPKALF	1321.82	7.18203	PTx	10	2.62911	0.040988
PTx-S3	1	13	VAPGIVIPPKALF	1321.82	7.14724	PTx	30	3.02975	0.040908	5.65886
PTx-S3	1	13	VAPGIVIPPKALF	1321.82	7.14077	PTx-E6290	0	0	0
PTx-S3	1	13	VAPGIVIPPKALF	1321.82	7.16643	PTx-E6290	10	2.6262	0.032906
PTx-S3	1	13	VAPGIVIPPKALF	1321.82	7.14293	PTx-E6290	30	2.81998	0.09746	5.44618	0.212681	0.29238
PTx-S3	3	12	PGIVIPPKAL	1004.65	6.19461	PTx	0	0	0
PTx-S3	3	12	PGIVIPPKAL	1004.65	6.23872	PTx	10	2.51092	0.257621
PTx-S3	3	12	PGIVIPPKAL	1004.65	6.20269	PTx	30	2.77697	0.261366	5.28789
PTx-S3	3	12	PGIVIPPKAL	1004.65	6.19461	PTx-E6290	0	0	0
PTx-S3	3	12	PGIVIPPKAL	1004.65	6.22321	PTx-E6290	10	2.4661	0.206005
PTx-S3	3	12	PGIVIPPKAL	1004.65	6.2023	PTx-E6290	30	2.60008	0.199281	5.06618	0.221711	0.784098
PTx-S3	3	13	PGIVIPPKALF	1151.72	7.13907	PTx	0	0	0
PTx-S3	3	13	PGIVIPPKALF	1151.72	7.17933	PTx	10	2.72023	0.289347
PTx-S3	3	13	PGIVIPPKALF	1151.72	7.14455	PTx	30	3.16892	0.203628	5.88915
PTx-S3	3	13	PGIVIPPKALF	1151.72	7.13907	PTx-E6290	0	0	0
PTx-S3	3	13	PGIVIPPKALF	1151.72	7.16515	PTx-E6290	10	2.73583	0.145541
PTx-S3	3	13	PGIVIPPKALF	1151.72	7.14353	PTx-E6290	30	2.71283	0.245454	5.44867	0.440482	0.868041
PTx-S3	4	12	GIVIPPKAL	907.597	5.90633	PTx	0	0	0
PTx-S3	4	12	GIVIPPKAL	907.597	5.94946	PTx	10	2.0903	0.032713
PTx-S3	4	12	GIVIPPKAL	907.597	5.91391	PTx	30	2.42547	0.032966	4.51577
PTx-S3	4	12	GIVIPPKAL	907.597	5.90633	PTx-E6290	0	0	0
PTx-S3	4	12	GIVIPPKAL	907.597	5.93498	PTx-E6290	10	2.07165	0.032764
PTx-S3	4	12	GIVIPPKAL	907.597	5.9149	PTx-E6290	30	2.25882	0.166999	4.33047	0.185299	0.500997
PTx-S3	13	31	FTQQGGAYGRCPNGTRALT	1997.96	5.22423	PTx	0	0	0
PTx-S3	13	31	FTQQGGAYGRCPNGTRALT	1997.96	5.26398	PTx	10	3.76355	0.177653
PTx-S3	13	31	FTQQGGAYGRCPNGTRALT	1997.96	5.23814	PTx	30	4.12314	0.112592	7.88668
PTx-S3	13	31	FTQQGGAYGRCPNGTRALT	1997.96	5.22423	PTx-E6290	0	0	0
PTx-S3	13	31	FTQQGGAYGRCPNGTRALT	1997.96	5.26551	PTx-E6290	10	3.6543	0.165496
PTx-S3	13	31	FTQQGGAYGRCPNGTRALT	1997.96	5.23743	PTx-E6290	30	3.53585	0.32874	7.19015	0.696533	0.98622
PTx-S3	21	41	GRCPNGTRALTVAELRGNAEL	2198.15	7.15861	PTx	0	0	0
PTx-S3	21	41	GRCPNGTRALTVAELRGNAEL	2198.15	7.19037	PTx	10	4.14689	0.235784
PTx-S3	21	41	GRCPNGTRALTVAELRGNAEL	2198.15	7.15555	PTx	30	4.47637	0.061646	8.62325
PTx-S3	21	41	GRCPNGTRALTVAELRGNAEL	2198.15	7.15861	PTx-E6290	0	0	0
PTx-S3	21	41	GRCPNGTRALTVAELRGNAEL	2198.15	7.17576	PTx-E6290	10	4.1654	0.235861
PTx-S3	21	41	GRCPNGTRALTVAELRGNAEL	2198.15	7.16005	PTx-E6290	30	4.60474	0.052816	8.77014	-0.146891	0.707583
PTx-S3	29	35	ALTVAEL	716.419	7.14332	PTx	0	0	0
PTx-S3	29	35	ALTVAEL	716.419	7.1878	PTx	10	0.134857	0.015175
PTx-S3	29	35	ALTVAEL	716.419	7.15356	PTx	30	0.097809	0.042162	0.232666
PTx-S3	29	35	ALTVAEL	716.419	7.14332	PTx-E6290	0	0	0
PTx-S3	29	35	ALTVAEL	716.419	7.17406	PTx-E6290	10	-0.000678	0.103713
PTx-S3	29	35	ALTVAEL	716.419	7.15029	PTx-E6290	30	0.0151	0.05204	0.014422	0.218244	0.311139
PTx-S3	32	41	VAELRGNAEL	1071.58	5.53538	PTx	0	0	0
PTx-S3	32	41	VAELRGNAEL	1071.58	5.57959	PTx	10	2.15627	0.213816
PTx-S3	32	41	VAELRGNAEL	1071.58	5.54491	PTx	30	2.4422	0.036799	4.59848
PTx-S3	32	41	VAELRGNAEL	1071.58	5.53538	PTx-E6290	0	0	0
PTx-S3	32	41	VAELRGNAEL	1071.58	5.56701	PTx-E6290	10	2.23623	0.103925
PTx-S3	32	41	VAELRGNAEL	1071.58	5.54612	PTx-E6290	30	2.32444	0.10399	4.56067	0.037806	0.641448
PTx-S3	35	41	LRGNAEL	772.431	4.78827	PTx	0	0	0
PTx-S3	35	41	LRGNAEL	772.431	4.8605	PTx	10	1.83327	0.072497
PTx-S3	35	41	LRGNAEL	772.431	4.82478	PTx	30	2.00618	0.063768	3.83945
PTx-S3	35	41	LRGNAEL	772.431	4.78827	PTx-E6290	0	0	0
PTx-S3	35	41	LRGNAEL	772.431	4.83856	PTx-E6290	10	1.81903	0.06592
PTx-S3	35	41	LRGNAEL	772.431	4.82684	PTx-E6290	30	1.82285	0.070552	3.64189	0.197567	0.217491
PTx-S3	35	43	LRGNAELQT	1001.54	4.7352	PTx	0	0	0
PTx-S3	35	43	LRGNAELQT	1001.54	4.76271	PTx	10	3.09911	0.025046
PTx-S3	35	43	LRGNAELQT	1001.54	4.73348	PTx	30	3.4597	0.056344	6.55881
PTx-S3	35	43	LRGNAELQT	1001.54	4.7352	PTx-E6290	0	0	0
PTx-S3	35	43	LRGNAELQT	1001.54	4.74583	PTx-E6290	10	3.03954	0.02669
PTx-S3	35	43	LRGNAELQT	1001.54	4.73596	PTx-E6290	30	3.20795	0.081276	6.24749	0.311326	0.243828
PTx-S3	36	43	RGNAELQT	888.453	4.279	PTx	0	0	0
PTx-S3	36	43	RGNAELQT	888.453	4.32029	PTx	10	2.4978	0.073821
PTx-S3	36	43	RGNAELQT	888.453	4.26864	PTx	30	2.96643	0.056961	5.46423
PTx-S3	36	43	RGNAELQT	888.453	4.279	PTx-E6290	0	0	0
PTx-S3	36	43	RGNAELQT	888.453	4.28484	PTx-E6290	10	2.4199	0.068439
PTx-S3	36	43	RGNAELQT	888.453	4.269	PTx-E6290	30	2.74703	0.031671	5.16693	0.297297	0.221463
PTx-S3	44	55	YLRQITPGWSIY	1496.79	7.40243	PTx	0	0	0
PTx-S3	44	55	YLRQITPGWSIY	1496.79	7.44219	PTx	10	3.72905	0.081067
PTx-S3	44	55	YLRQITPGWSIY	1496.79	7.41026	PTx	30	4.38889	0.05181	8.11795
PTx-S3	44	55	YLRQITPGWSIY	1496.79	7.40243	PTx-E6290	0	0	0
PTx-S3	44	55	YLRQITPGWSIY	1496.79	7.43293	PTx-E6290	10	3.4635	0.054624
PTx-S3	44	55	YLRQITPGWSIY	1496.79	7.4061	PTx-E6290	30	3.88285	0.099347	7.34635	0.771596	0.298041
PTx-S3	44	57	YLRQITPGWSIYGL	1666.9	7.91413	PTx	0	0	0
PTx-S3	44	57	YLRQITPGWSIYGL	1666.9	7.95577	PTx	10	3.58829	0.152167
PTx-S3	44	57	YLRQITPGWSIYGL	1666.9	7.92113	PTx	30	4.15356	0.046016	7.74185
PTx-S3	44	57	YLRQITPGWSIYGL	1666.9	7.91413	PTx-E6290	0	0	0
PTx-S3	44	57	YLRQITPGWSIYGL	1666.9	7.94601	PTx-E6290	10	3.28055	0.084638
PTx-S3	44	57	YLRQITPGWSIYGL	1666.9	7.91622	PTx-E6290	30	3.68666	0.091526	6.96721	0.774639	0.456501
PTx-S3	44	59	YLRQITPGWSIYGLYD	1944.99	7.92746	PTx	0	0	0
PTx-S3	44	59	YLRQITPGWSIYGLYD	1944.99	7.9673	PTx	10	4.04309	0.073548
PTx-S3	44	59	YLRQITPGWSIYGLYD	1944.99	7.93278	PTx	30	4.79081	0.120768	8.8339
PTx-S3	44	59	YLRQITPGWSIYGLYD	1944.99	7.92746	PTx-E6290	0	0	0
PTx-S3	44	59	YLRQITPGWSIYGLYD	1944.99	7.95948	PTx-E6290	10	3.85003	0.09655
PTx-S3	44	59	YLRQITPGWSIYGLYD	1944.99	7.93046	PTx-E6290	30	4.23345	0.166601	8.08348	0.750415	0.499803
PTx-S3	44	61	YLRQITPGWSIYGLYDGT	2103.05	7.89224	PTx	0	0	0
PTx-S3	44	61	YLRQITPGWSIYGLYDGT	2103.05	7.93219	PTx	10	4.30852	0.130666
PTx-S3	44	61	YLRQITPGWSIYGLYDGT	2103.05	7.89696	PTx	30	4.77844	0.145631	9.08696
PTx-S3	44	61	YLRQITPGWSIYGLYDGT	2103.05	7.89224	PTx-E6290	0	0	0
PTx-S3	44	61	YLRQITPGWSIYGLYDGT	2103.05	7.92186	PTx-E6290	10	3.96441	0.164523
PTx-S3	44	61	YLRQITPGWSIYGLYDGT	2103.05	7.89541	PTx-E6290	30	4.29806	0.123373	8.26247	0.824487	0.493569
PTx-S3	45	80	LRQITPGWSIYGLYDGTYLGQAYGGIIKDAPPGAGF	3815.94	8.28908	PTx	0	0	0
PTx-S3	45	80	LRQITPGWSIYGLYDGTYLGQAYGGIIKDAPPGAGF	3815.94	8.31432	PTx	10	8.74247	0.091411
PTx-S3	45	80	LRQITPGWSIYGLYDGTYLGQAYGGIIKDAPPGAGF	3815.94	8.28518	PTx	30	9.60044	0.125245	18.3429
PTx-S3	45	80	LRQITPGWSIYGLYDGTYLGQAYGGIIKDAPPGAGF	3815.94	8.28908	PTx-E6290	0	0	0
PTx-S3	45	80	LRQITPGWSIYGLYDGTYLGQAYGGIIKDAPPGAGF	3815.94	8.31185	PTx-E6290	10	7.76577	0.186758
PTx-S3	45	80	LRQITPGWSIYGLYDGTYLGQAYGGIIKDAPPGAGF	3815.94	8.28865	PTx-E6290	30	8.66709	0.087198	16.4329	1.91005	0.560274
PTx-S3	46	55	RQITPGWSIY	1220.64	7.0595	PTx	0	0	0
PTx-S3	46	55	RQITPGWSIY	1220.64	7.10415	PTx	10	3.04872	0.122138
PTx-S3	46	55	RQITPGWSIY	1220.64	7.07286	PTx	30	3.43745	0.105552	6.48617
PTx-S3	46	55	RQITPGWSIY	1220.64	7.0595	PTx-E6290	0	0	0
PTx-S3	46	55	RQITPGWSIY	1220.64	7.09342	PTx-E6290	10	2.77731	0.10831
PTx-S3	46	55	RQITPGWSIY	1220.64	7.06823	PTx-E6290	30	3.03635	0.126926	5.81367	0.672506	0.380778
PTx-S3	46	57	RQITPGWSIYGL	1390.75	7.69899	PTx	0	0	0
PTx-S3	46	57	RQITPGWSIYGL	1390.75	7.73906	PTx	10	2.7973	0.079341
PTx-S3	46	57	RQITPGWSIYGL	1390.75	7.7064	PTx	30	3.18629	0.034212	5.98359
PTx-S3	46	57	RQITPGWSIYGL	1390.75	7.69899	PTx-E6290	0	0	0
PTx-S3	46	57	RQITPGWSIYGL	1390.75	7.7308	PTx-E6290	10	2.48246	0.118952
PTx-S3	46	57	RQITPGWSIYGL	1390.75	7.70254	PTx-E6290	30	2.81658	0.046339	5.29903	0.684556	0.356856
PTx-S3	46	58	RQITPGWSIYGLY	1553.81	7.86817	PTx	0	0	0
PTx-S3	46	58	RQITPGWSIYGLY	1553.81	7.91268	PTx	10	3.21324	0.081284
PTx-S3	46	58	RQITPGWSIYGLY	1553.81	7.87395	PTx	30	3.6084	0.074328	6.82164
PTx-S3	46	58	RQITPGWSIYGLY	1553.81	7.86817	PTx-E6290	0	0	0
PTx-S3	46	58	RQITPGWSIYGLY	1553.81	7.90077	PTx-E6290	10	3.11876	0.034985
PTx-S3	46	58	RQITPGWSIYGLY	1553.81	7.87223	PTx-E6290	30	3.21332	0.072705	6.33208	0.489561	0.243852
PTx-S3	46	59	RQITPGWSIYGLYD	1668.84	7.73377	PTx	0	0	0
PTx-S3	46	59	RQITPGWSIYGLYD	1668.84	7.77383	PTx	10	3.1697	0.062704
PTx-S3	46	59	RQITPGWSIYGLYD	1668.84	7.74009	PTx	30	3.58705	0.097799	6.75676
PTx-S3	46	59	RQITPGWSIYGLYD	1668.84	7.73377	PTx-E6290	0	0	0
PTx-S3	46	59	RQITPGWSIYGLYD	1668.84	7.76523	PTx-E6290	10	3.04071	0.121094
PTx-S3	46	59	RQITPGWSIYGLYD	1668.84	7.73719	PTx-E6290	30	3.13474	0.052065	6.17545	0.581311	0.363282
PTx-S3	46	61	RQITPGWSIYGLYDGT	1826.91	7.71982	PTx	0	0	0
PTx-S3	46	61	RQITPGWSIYGLYDGT	1826.91	7.75699	PTx	10	3.33442	0.113725
PTx-S3	46	61	RQITPGWSIYGLYDGT	1826.91	7.72373	PTx	30	3.66274	0.03083	6.99716
PTx-S3	46	61	RQITPGWSIYGLYDGT	1826.91	7.71982	PTx-E6290	0	0	0
PTx-S3	46	61	RQITPGWSIYGLYDGT	1826.91	7.7489	PTx-E6290	10	3.0777	0.036241
PTx-S3	46	61	RQITPGWSIYGLYDGT	1826.91	7.72144	PTx-E6290	30	3.36134	0.120945	6.43904	0.558126	0.362835
PTx-S3	46	62	RQITPGWSIYGLYDGTY	1989.97	7.96372	PTx	0	0	0
PTx-S3	46	62	RQITPGWSIYGLYDGTY	1989.97	7.99959	PTx	10	3.38964	0.18725
PTx-S3	46	62	RQITPGWSIYGLYDGTY	1989.97	7.96732	PTx	30	3.80482	0.059311	7.19446
PTx-S3	46	62	RQITPGWSIYGLYDGTY	1989.97	7.96372	PTx-E6290	0	0	0
PTx-S3	46	62	RQITPGWSIYGLYDGTY	1989.97	7.99118	PTx-E6290	10	3.30455	0.207312
PTx-S3	46	62	RQITPGWSIYGLYDGTY	1989.97	7.96386	PTx-E6290	30	3.32583	0.138548	6.63038	0.564085	0.621936
PTx-S3	46	80	RQITPGWSIYGLYDGTYLGQAYGGIIKDAPPGAGF	3702.86	8.25009	PTx	0	0	0
PTx-S3	46	80	RQITPGWSIYGLYDGTYLGQAYGGIIKDAPPGAGF	3702.86	8.27198	PTx	10	8.03328	0.156516
PTx-S3	46	80	RQITPGWSIYGLYDGTYLGQAYGGIIKDAPPGAGF	3702.86	8.24673	PTx	30	8.88276	0.052298	16.916
PTx-S3	46	80	RQITPGWSIYGLYDGTYLGQAYGGIIKDAPPGAGF	3702.86	8.25009	PTx-E6290	0	0	0
PTx-S3	46	80	RQITPGWSIYGLYDGTYLGQAYGGIIKDAPPGAGF	3702.86	8.26859	PTx-E6290	10	7.21869	0.160182
PTx-S3	46	80	RQITPGWSIYGLYDGTYLGQAYGGIIKDAPPGAGF	3702.86	8.24956	PTx-E6290	30	8.24527	0.066612	15.464	1.45208	0.480546
PTx-S3	47	55	QITPGWSIY	1064.54	7.98253	PTx	0	0	0
PTx-S3	47	55	QITPGWSIY	1064.54	8.02113	PTx	10	1.89566	0.102259
PTx-S3	47	55	QITPGWSIY	1064.54	7.98755	PTx	30	1.97857	0.117109	3.87423
PTx-S3	47	55	QITPGWSIY	1064.54	7.98253	PTx-E6290	0	0	0
PTx-S3	47	55	QITPGWSIY	1064.54	8.01568	PTx-E6290	10	1.62459	0.200866
PTx-S3	47	55	QITPGWSIY	1064.54	7.98439	PTx-E6290	30	1.64431	0.122279	3.2689	0.605324	0.602598
PTx-S3	47	57	QITPGWSIYGL	1234.65	8.56855	PTx	0	0	0
PTx-S3	47	57	QITPGWSIYGL	1234.65	8.59912	PTx	10	2.64908	0.0367
PTx-S3	47	57	QITPGWSIYGL	1234.65	8.57291	PTx	30	2.77947	0.049634	5.42855
PTx-S3	47	57	QITPGWSIYGL	1234.65	8.56855	PTx-E6290	0	0	0
PTx-S3	47	57	QITPGWSIYGL	1234.65	8.59397	PTx-E6290	10	2.37559	0.050049
PTx-S3	47	57	QITPGWSIYGL	1234.65	8.57701	PTx-E6290	30	2.35568	0.046342	4.73127	0.697281	0.150147
PTx-S3	48	55	ITPGWSIY	936.482	7.95527	PTx	0	0	0
PTx-S3	48	55	ITPGWSIY	936.482	7.9963	PTx	10	2.16019	0.047191
PTx-S3	48	55	ITPGWSIY	936.482	7.96122	PTx	30	2.25903	0.046261	4.41922
PTx-S3	48	55	ITPGWSIY	936.482	7.95527	PTx-E6290	0	0	0
PTx-S3	48	55	ITPGWSIY	936.482	7.98535	PTx-E6290	10	1.95142	0.027754
PTx-S3	48	55	ITPGWSIY	936.482	7.95676	PTx-E6290	30	2.1386	0.023927	4.09002	0.329204	0.141573
PTx-S3	48	56	ITPGWSIYG	993.504	7.71857	PTx	0	0	0
PTx-S3	48	56	ITPGWSIYG	993.504	7.75716	PTx	10	2.08044	0.079255
PTx-S3	48	56	ITPGWSIYG	993.504	7.72331	PTx	30	2.26713	0.033586	4.34757
PTx-S3	48	56	ITPGWSIYG	993.504	7.71857	PTx-E6290	0	0	0
PTx-S3	48	56	ITPGWSIYG	993.504	7.74737	PTx-E6290	10	1.92006	0.15249
PTx-S3	48	56	ITPGWSIYG	993.504	7.72228	PTx-E6290	30	1.92845	0.131185	3.8485	0.499065	0.45747
PTx-S3	48	57	ITPGWSIYGL	1106.59	8.57007	PTx	0	0	0
PTx-S3	48	57	ITPGWSIYGL	1106.59	8.60283	PTx	10	2.11564	0.030857
PTx-S3	48	57	ITPGWSIYGL	1106.59	8.57418	PTx	30	2.25235	0.019562	4.36799
PTx-S3	48	57	ITPGWSIYGL	1106.59	8.57007	PTx-E6290	0	0	0
PTx-S3	48	57	ITPGWSIYGL	1106.59	8.59505	PTx-E6290	10	1.96216	0.029336
PTx-S3	48	57	ITPGWSIYGL	1106.59	8.57331	PTx-E6290	30	2.0629	0.030079	4.02506	0.342936	0.092571
PTx-S3	56	72	GLYDGTYLGQAYGGIIK	1788.92	7.42577	PTx	0	0	0
PTx-S3	56	72	GLYDGTYLGQAYGGIIK	1788.92	7.45116	PTx	10	3.70514	0.076209
PTx-S3	56	72	GLYDGTYLGQAYGGIIK	1788.92	7.42072	PTx	30	4.10676	0.066867	7.8119
PTx-S3	56	72	GLYDGTYLGQAYGGIIK	1788.92	7.42577	PTx-E6290	0	0	0
PTx-S3	56	72	GLYDGTYLGQAYGGIIK	1788.92	7.44473	PTx-E6290	10	3.19079	0.133406
PTx-S3	56	72	GLYDGTYLGQAYGGIIK	1788.92	7.42374	PTx-E6290	30	3.54674	0.013837	6.73753	1.07437	0.400218
PTx-S3	56	80	GLYDGTYLGQAYGGIIKDAPPGAGF	2501.23	7.93808	PTx	0	0	0
PTx-S3	56	80	GLYDGTYLGQAYGGIIKDAPPGAGF	2501.23	7.95711	PTx	10	4.75735	0.071347
PTx-S3	56	80	GLYDGTYLGQAYGGIIKDAPPGAGF	2501.23	7.92587	PTx	30	5.28853	0.075089	10.0459
PTx-S3	56	80	GLYDGTYLGQAYGGIIKDAPPGAGF	2501.23	7.93808	PTx-E6290	0	0	0
PTx-S3	56	80	GLYDGTYLGQAYGGIIKDAPPGAGF	2501.23	7.95279	PTx-E6290	10	4.29659	0.037167
PTx-S3	56	80	GLYDGTYLGQAYGGIIKDAPPGAGF	2501.23	7.92522	PTx-E6290	30	4.71562	0.1158	9.01221	1.03367	0.3474
PTx-S3	58	67	YDGTYLGQAY	1150.51	7.09818	PTx	0	0	0
PTx-S3	58	67	YDGTYLGQAY	1150.51	7.1356	PTx	10	1.87959	0.026066
PTx-S3	58	67	YDGTYLGQAY	1150.51	7.10335	PTx	30	1.98337	0.031817	3.86296
PTx-S3	58	67	YDGTYLGQAY	1150.51	7.09818	PTx-E6290	0	0	0
PTx-S3	58	67	YDGTYLGQAY	1150.51	7.12175	PTx-E6290	10	1.61524	0.034207
PTx-S3	58	67	YDGTYLGQAY	1150.51	7.102	PTx-E6290	30	1.72594	0.031736	3.34117	0.521783	0.102621
PTx-S3	58	68	YDGTYLGQAYG	1207.53	6.9143	PTx	0	0	0
PTx-S3	58	68	YDGTYLGQAYG	1207.53	6.95015	PTx	10	2.00644	0.060622
PTx-S3	58	68	YDGTYLGQAYG	1207.53	6.91939	PTx	30	2.19331	0.144317	4.19975
PTx-S3	58	68	YDGTYLGQAYG	1207.53	6.9143	PTx-E6290	0	0	0
PTx-S3	58	68	YDGTYLGQAYG	1207.53	6.93698	PTx-E6290	10	1.8019	0.215604
PTx-S3	58	68	YDGTYLGQAYG	1207.53	6.92273	PTx-E6290	30	2.04057	0.042942	3.84247	0.357286	0.646812
PTx-S3	58	72	YDGTYLGQAYGGIIK	1618.81	6.91868	PTx	0	0	0
PTx-S3	58	72	YDGTYLGQAYGGIIK	1618.81	6.9493	PTx	10	3.52135	0.119739
PTx-S3	58	72	YDGTYLGQAYGGIIK	1618.81	6.91794	PTx	30	3.75564	0.085506	7.27699
PTx-S3	58	72	YDGTYLGQAYGGIIK	1618.81	6.91868	PTx-E6290	0	0	0
PTx-S3	58	72	YDGTYLGQAYGGIIK	1618.81	6.93374	PTx-E6290	10	3.16017	0.028453
PTx-S3	58	72	YDGTYLGQAYGGIIK	1618.81	6.91773	PTx-E6290	30	3.37054	0.118775	6.53071	0.746275	0.359217
PTx-S3	58	79	YDGTYLGQAYGGIIKDAPPGAG	2184.06	7.02442	PTx	0	0	0
PTx-S3	58	79	YDGTYLGQAYGGIIKDAPPGAG	2184.06	7.04884	PTx	10	4.64382	0.123271
PTx-S3	58	79	YDGTYLGQAYGGIIKDAPPGAG	2184.06	7.01583	PTx	30	5.22675	0.0863	9.87057
PTx-S3	58	79	YDGTYLGQAYGGIIKDAPPGAG	2184.06	7.02442	PTx-E6290	0	0	0
PTx-S3	58	79	YDGTYLGQAYGGIIKDAPPGAG	2184.06	7.03499	PTx-E6290	10	4.56461	0.034262
PTx-S3	58	79	YDGTYLGQAYGGIIKDAPPGAG	2184.06	7.01397	PTx-E6290	30	5.11758	0.107342	9.68218	0.188382	0.369813
PTx-S3	58	80	YDGTYLGQAYGGIIKDAPPGAGF	2331.13	7.56199	PTx	0	0	0
PTx-S3	58	80	YDGTYLGQAYGGIIKDAPPGAGF	2331.13	7.58743	PTx	10	4.43119	0.158724
PTx-S3	58	80	YDGTYLGQAYGGIIKDAPPGAGF	2331.13	7.5525	PTx	30	4.9596	0.08799	9.39079
PTx-S3	58	80	YDGTYLGQAYGGIIKDAPPGAGF	2331.13	7.56199	PTx-E6290	0	0	0
PTx-S3	58	80	YDGTYLGQAYGGIIKDAPPGAGF	2331.13	7.5766	PTx-E6290	10	4.05008	0.110584
PTx-S3	58	80	YDGTYLGQAYGGIIKDAPPGAGF	2331.13	7.55112	PTx-E6290	30	4.48221	0.106233	8.53229	0.858493	0.476172
PTx-S3	59	67	DGTYLGQAY	987.442	7.00558	PTx	0	0	0
PTx-S3	59	67	DGTYLGQAY	987.442	7.044	PTx	10	1.85853	0.106113
PTx-S3	59	67	DGTYLGQAY	987.442	7.00922	PTx	30	1.93904	0.074397	3.79757
PTx-S3	59	67	DGTYLGQAY	987.442	7.00558	PTx-E6290	0	0	0
PTx-S3	59	67	DGTYLGQAY	987.442	7.02805	PTx-E6290	10	1.70244	0.078889
PTx-S3	59	67	DGTYLGQAY	987.442	7.00767	PTx-E6290	30	1.79231	0.103058	3.49475	0.302822	0.318339
PTx-S3	59	80	DGTYLGQAYGGIIKDAPPGAGF	2168.07	7.58145	PTx	0	0	0
PTx-S3	59	80	DGTYLGQAYGGIIKDAPPGAGF	2168.07	7.60568	PTx	10	4.53567	0.10885
PTx-S3	59	80	DGTYLGQAYGGIIKDAPPGAGF	2168.07	7.56889	PTx	30	5.1284	0.072327	9.66406
PTx-S3	59	80	DGTYLGQAYGGIIKDAPPGAGF	2168.07	7.58145	PTx-E6290	0	0	0
PTx-S3	59	80	DGTYLGQAYGGIIKDAPPGAGF	2168.07	7.59572	PTx-E6290	10	4.01664	0.088393
PTx-S3	59	80	DGTYLGQAYGGIIKDAPPGAGF	2168.07	7.57097	PTx-E6290	30	4.6845	0.213771	8.70114	0.962918	0.641313
PTx-S3	60	80	GTYLGQAYGGIIKDAPPGAGF	2053.04	7.30398	PTx	0	0	0
PTx-S3	60	80	GTYLGQAYGGIIKDAPPGAGF	2053.04	7.33458	PTx	10	4.3589	0.174351
PTx-S3	60	80	GTYLGQAYGGIIKDAPPGAGF	2053.04	7.29848	PTx	30	4.9299	0.058089	9.2888
PTx-S3	60	80	GTYLGQAYGGIIKDAPPGAGF	2053.04	7.30398	PTx-E6290	0	0	0
PTx-S3	60	80	GTYLGQAYGGIIKDAPPGAGF	2053.04	7.32278	PTx-E6290	10	4.08174	0.103803
PTx-S3	60	80	GTYLGQAYGGIIKDAPPGAGF	2053.04	7.29812	PTx-E6290	30	4.48904	0.208286	8.57078	0.718021	0.624858
PTx-S3	62	72	YLGQAYGGIIK	1182.65	6.32996	PTx	0	0	0
PTx-S3	62	72	YLGQAYGGIIK	1182.65	6.37379	PTx	10	3.11426	0.11442
PTx-S3	62	72	YLGQAYGGIIK	1182.65	6.33921	PTx	30	3.6035	0.094193	6.71777
PTx-S3	62	72	YLGQAYGGIIK	1182.65	6.32996	PTx-E6290	0	0	0
PTx-S3	62	72	YLGQAYGGIIK	1182.65	6.36155	PTx-E6290	10	2.88561	0.100212
PTx-S3	62	72	YLGQAYGGIIK	1182.65	6.33933	PTx-E6290	30	3.37994	0.087783	6.26555	0.452216	0.34326
PTx-S3	62	80	YLGQAYGGIIKDAPPGAGF	1894.97	7.10232	PTx	0	0	0
PTx-S3	62	80	YLGQAYGGIIKDAPPGAGF	1894.97	7.13896	PTx	10	3.79697	0.092511
PTx-S3	62	80	YLGQAYGGIIKDAPPGAGF	1894.97	7.106	PTx	30	4.32876	0.07221	8.12572
PTx-S3	62	80	YLGQAYGGIIKDAPPGAGF	1894.97	7.10232	PTx-E6290	0	0	0
PTx-S3	62	80	YLGQAYGGIIKDAPPGAGF	1894.97	7.1247	PTx-E6290	10	3.38773	0.032182
PTx-S3	62	80	YLGQAYGGIIKDAPPGAGF	1894.97	7.10389	PTx-E6290	30	3.76256	0.057343	7.15029	0.97543	0.277533
PTx-S3	63	69	LGQAYGG	665.325	5.36363	PTx	0	0	0
PTx-S3	63	69	LGQAYGG	665.325	5.4032	PTx	10	0.988179	0.046004
PTx-S3	63	69	LGQAYGG	665.325	5.37034	PTx	30	1.00942	0.046789	1.9976
PTx-S3	63	69	LGQAYGG	665.325	5.36363	PTx-E6290	0	0	0
PTx-S3	63	69	LGQAYGG	665.325	5.39415	PTx-E6290	10	0.951477	0.044029
PTx-S3	63	69	LGQAYGG	665.325	5.36969	PTx-E6290	30	0.924254	0.047422	1.87573	0.121869	0.142266
PTx-S3	63	80	LGQAYGGIIKDAPPGAGF	1731.91	6.75996	PTx	0	0	0
PTx-S3	63	80	LGQAYGGIIKDAPPGAGF	1731.91	6.79894	PTx	10	3.35435	0.072024
PTx-S3	63	80	LGQAYGGIIKDAPPGAGF	1731.91	6.77037	PTx	30	3.82189	0.026684	7.17624
PTx-S3	63	80	LGQAYGGIIKDAPPGAGF	1731.91	6.75996	PTx-E6290	0	0	0
PTx-S3	63	80	LGQAYGGIIKDAPPGAGF	1731.91	6.78503	PTx-E6290	10	3.09054	0.066049
PTx-S3	63	80	LGQAYGGIIKDAPPGAGF	1731.91	6.76775	PTx-E6290	30	3.36342	0.085311	6.45397	0.722274	0.255933
PTx-S3	67	73	YGGIIKD	765.414	5.86327	PTx	0	0	0
PTx-S3	67	73	YGGIIKD	765.414	5.90378	PTx	10	0.729732	0.095414
PTx-S3	67	73	YGGIIKD	765.414	5.86868	PTx	30	0.803422	0.125711	1.53315
PTx-S3	67	73	YGGIIKD	765.414	5.86327	PTx-E6290	0	0	0
PTx-S3	67	73	YGGIIKD	765.414	5.88413	PTx-E6290	10	0.665751	0.007715
PTx-S3	67	73	YGGIIKD	765.414	5.86388	PTx-E6290	30	0.796289	0.039229	1.46204	0.071114	0.377133
PTx-S3	68	80	GGIIKDAPPGAGF	1199.64	6.16526	PTx	0	0	0
PTx-S3	68	80	GGIIKDAPPGAGF	1199.64	6.21067	PTx	10	1.32446	0.130873
PTx-S3	68	80	GGIIKDAPPGAGF	1199.64	6.17599	PTx	30	1.55221	0.127804	2.87667
PTx-S3	68	80	GGIIKDAPPGAGF	1199.64	6.16526	PTx-E6290	0	0	0
PTx-S3	68	80	GGIIKDAPPGAGF	1199.64	6.19721	PTx-E6290	10	1.16844	0.123309
PTx-S3	68	80	GGIIKDAPPGAGF	1199.64	6.17424	PTx-E6290	30	1.41633	0.126989	2.58477	0.2919	0.392619
PTx-S3	72	81	KDAPPGAGFI	972.515	5.26134	PTx	0	0	0
PTx-S3	72	81	KDAPPGAGFI	972.515	5.30462	PTx	10	2.18823	0.085647
PTx-S3	72	81	KDAPPGAGFI	972.515	5.27355	PTx	30	2.28867	0.064159	4.47691
PTx-S3	72	81	KDAPPGAGFI	972.515	5.26134	PTx-E6290	0	0	0
PTx-S3	72	81	KDAPPGAGFI	972.515	5.30264	PTx-E6290	10	2.15165	0.08296
PTx-S3	72	81	KDAPPGAGFI	972.515	5.27641	PTx-E6290	30	2.20984	0.059707	4.36149	0.115411	0.256941
PTx-S3	73	80	DAPPGAGF	731.336	6.41505	PTx	0	0	0
PTx-S3	73	80	DAPPGAGF	731.336	6.45812	PTx	10	0.209779	0.014263
PTx-S3	73	80	DAPPGAGF	731.336	6.42056	PTx	30	0.263949	0.013132	0.473728
PTx-S3	73	80	DAPPGAGF	731.336	6.41505	PTx-E6290	0	0	0
PTx-S3	73	80	DAPPGAGF	731.336	6.44221	PTx-E6290	10	0.177177	0.013358
PTx-S3	73	80	DAPPGAGF	731.336	6.42021	PTx-E6290	30	0.229926	0.01634	0.407103	0.066625	0.04902
PTx-S3	74	80	APPGAGF	616.309	5.99041	PTx	0	0	0
PTx-S3	74	80	APPGAGF	616.309	6.03912	PTx	10	0.217931	0.019815
PTx-S3	74	80	APPGAGF	616.309	6.00608	PTx	30	0.279639	0.019812	0.49757
PTx-S3	74	80	APPGAGF	616.309	5.99041	PTx-E6290	0	0	0
PTx-S3	74	80	APPGAGF	616.309	6.02933	PTx-E6290	10	0.210511	0.042298
PTx-S3	74	80	APPGAGF	616.309	6.00385	PTx-E6290	30	0.206768	0.027474	0.417279	0.080291	0.126894
PTx-S3	77	83	GAGFIYR	783.415	4.30283	PTx	0	0	0
PTx-S3	77	83	GAGFIYR	783.415	4.3682	PTx	10	0.156761	0.139489
PTx-S3	77	83	GAGFIYR	783.415	4.30828	PTx	30	-0.001922	0.104258	0.154839
PTx-S3	77	83	GAGFIYR	783.415	4.30283	PTx-E6290	0	0	0
PTx-S3	77	83	GAGFIYR	783.415	4.32117	PTx-E6290	10	-0.121158	0.13589
PTx-S3	77	83	GAGFIYR	783.415	4.30694	PTx-E6290	30	-0.138427	0.107428	-0.259585	0.414424	0.418467
PTx-S3	83	91	RETFCITTI	1083.55	5.42651	PTx	0	0	0
PTx-S3	83	91	RETFCITTI	1083.55	5.46955	PTx	10	1.59019	0.048163
PTx-S3	83	91	RETFCITTI	1083.55	5.43347	PTx	30	1.61857	0.048752	3.20876
PTx-S3	83	91	RETFCITTI	1083.55	5.42651	PTx-E6290	0	0	0
PTx-S3	83	91	RETFCITTI	1083.55	5.4577	PTx-E6290	10	1.49402	0.080908
PTx-S3	83	91	RETFCITTI	1083.55	5.43288	PTx-E6290	30	1.51295	0.057752	3.00697	0.201788	0.242724
PTx-S3	86	92	FCITTIY	860.422	7.92098	PTx	0	0	0
PTx-S3	86	92	FCITTIY	860.422	7.96401	PTx	10	0.203229	0.049843
PTx-S3	86	92	FCITTIY	860.422	7.92636	PTx	30	0.213509	0.036958	0.416738
PTx-S3	86	92	FCITTIY	860.422	7.92098	PTx-E6290	0	0	0
PTx-S3	86	92	FCITTIY	860.422	7.95285	PTx-E6290	10	-0.004385	0.099013
PTx-S3	86	92	FCITTIY	860.422	7.9241	PTx-E6290	30	0.119761	0.11387	0.115376	0.301362	0.34161
PTx-S3	91	102	IYKTGQPAADHY	1363.66	4.69867	PTx	0	0	0
PTx-S3	91	102	IYKTGQPAADHY	1363.66	4.72024	PTx	10	2.97602	0.208428
PTx-S3	91	102	IYKTGQPAADHY	1363.66	4.67575	PTx	30	3.03363	0.073621	6.00965
PTx-S3	91	102	IYKTGQPAADHY	1363.66	4.69838	PTx-E6290	0	0	0
PTx-S3	91	102	IYKTGQPAADHY	1363.66	4.6889	PTx-E6290	10	3.0888	0.150466
PTx-S3	91	102	IYKTGQPAADHY	1363.66	4.67826	PTx-E6290	30	2.9921	0.311429	6.0809	-0.071246	0.934287
PTx-S3	97	109	PAADHYYSKVTAT	1423.69	5.72521	PTx	0	0	0
PTx-S3	97	109	PAADHYYSKVTAT	1423.69	5.62075	PTx	10	2.96776	0.235083
PTx-S3	97	109	PAADHYYSKVTAT	1423.69	5.65635	PTx	30	3.60376	0.045192	6.57152
PTx-S3	97	109	PAADHYYSKVTAT	1423.69	5.72521	PTx-E6290	0	0	0
PTx-S3	97	109	PAADHYYSKVTAT	1423.69	5.60405	PTx-E6290	10	2.9702	0.228298
PTx-S3	97	109	PAADHYYSKVTAT	1423.69	5.5856	PTx-E6290	30	3.36979	0.096143	6.34	0.231522	0.705249
PTx-S3	101	111	HYYSKVTATRL	1338.72	4.82909	PTx	0	0	0
PTx-S3	101	111	HYYSKVTATRL	1338.72	4.86106	PTx	10	0.761675	0.14682
PTx-S3	101	111	HYYSKVTATRL	1338.72	4.81774	PTx	30	0.940235	0.191693	1.70191
PTx-S3	101	111	HYYSKVTATRL	1338.72	4.82909	PTx-E6290	0	0	0
PTx-S3	101	111	HYYSKVTATRL	1338.72	4.83197	PTx-E6290	10	0.645881	0.147932
PTx-S3	101	111	HYYSKVTATRL	1338.72	4.82318	PTx-E6290	30	0.885579	0.18969	1.53146	0.17045	0.575079
PTx-S3	104	111	SKVTATRL	875.531	4.62408	PTx	0	0	0
PTx-S3	104	111	SKVTATRL	875.531	4.71318	PTx	10	0.437409	0.120199
PTx-S3	104	111	SKVTATRL	875.531	4.65809	PTx	30	0.707717	0.105981	1.14513
PTx-S3	104	111	SKVTATRL	875.531	4.62408	PTx-E6290	0	0	0
PTx-S3	104	111	SKVTATRL	875.531	4.67154	PTx-E6290	10	0.323193	0.126393
PTx-S3	104	111	SKVTATRL	875.531	4.66308	PTx-E6290	30	0.551854	0.134575	0.875047	0.270079	0.403725
PTx-S3	113	119	ASTNSRL	748.395	9.35866	PTx	0	0	0
PTx-S3	113	119	ASTNSRL	748.395	9.39639	PTx	10	0.614318	0.052222
PTx-S3	113	119	ASTNSRL	748.395	9.35977	PTx	30	0.633499	0.039804	1.24782
PTx-S3	113	119	ASTNSRL	748.395	9.35866	PTx-E6290	0	0	0
PTx-S3	113	119	ASTNSRL	748.395	9.38114	PTx-E6290	10	0.560775	0.138443
PTx-S3	113	119	ASTNSRL	748.395	9.37768	PTx-E6290	30	0.684824	0.015021	1.2456	0.002218	0.415329
PTx-S3	118	124	RLCAVFV	807.455	7.35879	PTx	0	0	0
PTx-S3	118	124	RLCAVFV	807.455	7.39921	PTx	10	0.14431	0.032933
PTx-S3	118	124	RLCAVFV	807.455	7.36084	PTx	30	0.032999	0.067065	0.177309
PTx-S3	118	124	RLCAVFV	807.455	7.35879	PTx-E6290	0	0	0
PTx-S3	118	124	RLCAVFV	807.455	7.37864	PTx-E6290	10	-0.021563	0.038009
PTx-S3	118	124	RLCAVFV	807.455	7.35884	PTx-E6290	30	-0.035899	0.034802	-0.057462	0.234771	0.201195
PTx-S3	162	172	AVRVHVSKEEQ	1281.69	4.17602	PTx	0	0	0
PTx-S3	162	172	AVRVHVSKEEQ	1281.69	4.22343	PTx	10	0.696765	0.03488
PTx-S3	162	172	AVRVHVSKEEQ	1281.69	4.19929	PTx	30	0.78909	0.05293	1.48585
PTx-S3	162	172	AVRVHVSKEEQ	1281.69	4.17602	PTx-E6290	0	0	0
PTx-S3	162	172	AVRVHVSKEEQ	1281.69	4.21529	PTx-E6290	10	0.629792	0.045684
PTx-S3	162	172	AVRVHVSKEEQ	1281.69	4.20173	PTx-E6290	30	0.638329	0.062064	1.26812	0.217734	0.186192
PTx-S3	162	173	AVRVHVSKEEQY	1444.75	4.49442	PTx	0	0	0
PTx-S3	162	173	AVRVHVSKEEQY	1444.75	4.49581	PTx	10	0.936218	0.136087
PTx-S3	162	173	AVRVHVSKEEQY	1444.75	4.4381	PTx	30	1.05611	0.17078	1.99233
PTx-S3	162	173	AVRVHVSKEEQY	1444.75	4.49442	PTx-E6290	0	0	0
PTx-S3	162	173	AVRVHVSKEEQY	1444.75	4.45101	PTx-E6290	10	0.76501	0.130979
PTx-S3	162	173	AVRVHVSKEEQY	1444.75	4.43831	PTx-E6290	30	0.850453	0.132704	1.61546	0.376866	0.51234
PTx-S3	162	174	AVRVHVSKEEQYY	1607.82	5.02381	PTx	0	0	0
PTx-S3	162	174	AVRVHVSKEEQYY	1607.82	5.07603	PTx	10	0.89509	0.147951
PTx-S3	162	174	AVRVHVSKEEQYY	1607.82	5.05769	PTx	30	1.04507	0.185217	1.94016
PTx-S3	162	174	AVRVHVSKEEQYY	1607.82	5.02381	PTx-E6290	0	0	0
PTx-S3	162	174	AVRVHVSKEEQYY	1607.82	5.09597	PTx-E6290	10	0.714571	0.12013
PTx-S3	162	174	AVRVHVSKEEQYY	1607.82	5.05738	PTx-E6290	30	0.82561	0.184258	1.54018	0.399979	0.555651
PTx-S3	162	175	AVRVHVSKEEQYYD	1722.84	4.93547	PTx	0	0	0
PTx-S3	162	175	AVRVHVSKEEQYYD	1722.84	4.97707	PTx	10	1.0017	0.150798
PTx-S3	162	175	AVRVHVSKEEQYYD	1722.84	4.94819	PTx	30	1.11985	0.1867	2.12156
PTx-S3	162	175	AVRVHVSKEEQYYD	1722.84	4.93547	PTx-E6290	0	0	0
PTx-S3	162	175	AVRVHVSKEEQYYD	1722.84	4.96154	PTx-E6290	10	0.924283	0.127346
PTx-S3	162	175	AVRVHVSKEEQYYD	1722.84	4.94887	PTx-E6290	30	1.00521	0.149717	1.92949	0.192067	0.5601
PTx-S3	162	177	AVRVHVSKEEQYYDYE	2014.95	5.45001	PTx	0	0	0
PTx-S3	162	177	AVRVHVSKEEQYYDYE	2014.95	5.49133	PTx	10	1.00626	0.074397
PTx-S3	162	177	AVRVHVSKEEQYYDYE	2014.95	5.45807	PTx	30	1.18515	0.067681	2.19141
PTx-S3	162	177	AVRVHVSKEEQYYDYE	2014.95	5.45001	PTx-E6290	0	0	0
PTx-S3	162	177	AVRVHVSKEEQYYDYE	2014.95	5.47981	PTx-E6290	10	1.02169	0.065741
PTx-S3	162	177	AVRVHVSKEEQYYDYE	2014.95	5.45836	PTx-E6290	30	1.09673	0.078416	2.11842	0.072993	0.235248
PTx-S3	162	180	AVRVHVSKEEQYYDYEDAT	2302.06	5.5507	PTx	0	0	0
PTx-S3	162	180	AVRVHVSKEEQYYDYEDAT	2302.06	5.59261	PTx	10	1.778	0.084344
PTx-S3	162	180	AVRVHVSKEEQYYDYEDAT	2302.06	5.55829	PTx	30	1.96705	0.042908	3.74506
PTx-S3	162	180	AVRVHVSKEEQYYDYEDAT	2302.06	5.5507	PTx-E6290	0	0	0
PTx-S3	162	180	AVRVHVSKEEQYYDYEDAT	2302.06	5.58009	PTx-E6290	10	1.74268	0.081229
PTx-S3	162	180	AVRVHVSKEEQYYDYEDAT	2302.06	5.56045	PTx-E6290	30	1.68807	0.151925	3.43074	0.314312	0.455775
PTx-S3	162	181	AVRVHVSKEEQYYDYEDATF	2449.13	6.2105	PTx	0	0	0
PTx-S3	162	181	AVRVHVSKEEQYYDYEDATF	2449.13	6.2576	PTx	10	1.69085	0.16499
PTx-S3	162	181	AVRVHVSKEEQYYDYEDATF	2449.13	6.22494	PTx	30	1.9506	0.115019	3.64145
PTx-S3	162	181	AVRVHVSKEEQYYDYEDATF	2449.13	6.2105	PTx-E6290	0	0	0
PTx-S3	162	181	AVRVHVSKEEQYYDYEDATF	2449.13	6.24626	PTx-E6290	10	1.66019	0.156916
PTx-S3	162	181	AVRVHVSKEEQYYDYEDATF	2449.13	6.22481	PTx-E6290	30	1.80111	0.17161	3.4613	0.180147	0.51483
PTx-S3	162	183	AVRVHVSKEEQYYDYEDATFQT	2678.24	6.11261	PTx	0	0	0
PTx-S3	162	183	AVRVHVSKEEQYYDYEDATFQT	2678.24	6.15808	PTx	10	2.08434	0.134672
PTx-S3	162	183	AVRVHVSKEEQYYDYEDATFQT	2678.24	6.12536	PTx	30	2.34082	0.0959	4.42516
PTx-S3	162	183	AVRVHVSKEEQYYDYEDATFQT	2678.24	6.11261	PTx-E6290	0	0	0
PTx-S3	162	183	AVRVHVSKEEQYYDYEDATFQT	2678.24	6.1445	PTx-E6290	10	2.31686	0.10887
PTx-S3	162	183	AVRVHVSKEEQYYDYEDATFQT	2678.24	6.12626	PTx-E6290	30	1.93243	0.112098	4.24928	0.175882	0.404016
PTx-S3	163	172	VRVHVSKEEQ	1210.65	4.17745	PTx	0	0	0
PTx-S3	163	172	VRVHVSKEEQ	1210.65	4.22671	PTx	10	0.510531	0.119427
PTx-S3	163	172	VRVHVSKEEQ	1210.65	4.20159	PTx	30	0.586095	0.196643	1.09663
PTx-S3	163	172	VRVHVSKEEQ	1210.65	4.17745	PTx-E6290	0	0	0
PTx-S3	163	172	VRVHVSKEEQ	1210.65	4.21832	PTx-E6290	10	0.403739	0.156352
PTx-S3	163	172	VRVHVSKEEQ	1210.65	4.20486	PTx-E6290	30	0.397443	0.084113	0.801182	0.295444	0.589929
PTx-S3	163	175	VRVHVSKEEQYYD	1651.81	4.89069	PTx	0	0	0
PTx-S3	163	175	VRVHVSKEEQYYD	1651.81	4.92873	PTx	10	0.727924	0.170621
PTx-S3	163	175	VRVHVSKEEQYYD	1651.81	4.89536	PTx	30	0.897039	0.178872	1.62496
PTx-S3	163	175	VRVHVSKEEQYYD	1651.81	4.89069	PTx-E6290	0	0	0
PTx-S3	163	175	VRVHVSKEEQYYD	1651.81	4.90731	PTx-E6290	10	0.656136	0.137101
PTx-S3	163	175	VRVHVSKEEQYYD	1651.81	4.89967	PTx-E6290	30	0.743651	0.169886	1.39979	0.225176	0.536616
PTx-S3	163	177	VRVHVSKEEQYYDYE	1943.91	5.41803	PTx	0	0	0
PTx-S3	163	177	VRVHVSKEEQYYDYE	1943.91	5.45609	PTx	10	0.723327	0.07646
PTx-S3	163	177	VRVHVSKEEQYYDYE	1943.91	5.42657	PTx	30	0.869781	0.075305	1.59311
PTx-S3	163	177	VRVHVSKEEQYYDYE	1943.91	5.41803	PTx-E6290	0	0	0
PTx-S3	163	177	VRVHVSKEEQYYDYE	1943.91	5.44961	PTx-E6290	10	0.631008	0.048416
PTx-S3	163	177	VRVHVSKEEQYYDYE	1943.91	5.42619	PTx-E6290	30	0.713119	0.125121	1.34413	0.248981	0.375363
PTx-S3	163	180	VRVHVSKEEQYYDYEDAT	2231.03	5.52526	PTx	0	0	0
PTx-S3	163	180	VRVHVSKEEQYYDYEDAT	2231.03	5.56781	PTx	10	1.31385	0.12129
PTx-S3	163	180	VRVHVSKEEQYYDYEDAT	2231.03	5.53298	PTx	30	1.55733	0.069005	2.87118
PTx-S3	163	180	VRVHVSKEEQYYDYEDAT	2231.03	5.52526	PTx-E6290	0	0	0
PTx-S3	163	180	VRVHVSKEEQYYDYEDAT	2231.03	5.55584	PTx-E6290	10	1.30711	0.127663
PTx-S3	163	180	VRVHVSKEEQYYDYEDAT	2231.03	5.53432	PTx-E6290	30	1.3796	0.142354	2.68671	0.18447	0.427062
PTx-S3	164	175	RVHVSKEEQYYD	1552.74	4.65421	PTx	0	0	0
PTx-S3	164	175	RVHVSKEEQYYD	1552.74	4.67028	PTx	10	0.751885	0.154797
PTx-S3	164	175	RVHVSKEEQYYD	1552.74	4.62262	PTx	30	0.843669	0.095816	1.59555
PTx-S3	164	175	RVHVSKEEQYYD	1552.74	4.65421	PTx-E6290	0	0	0
PTx-S3	164	175	RVHVSKEEQYYD	1552.74	4.63302	PTx-E6290	10	0.613226	0.108827
PTx-S3	164	175	RVHVSKEEQYYD	1552.74	4.61984	PTx-E6290	30	0.663563	0.096543	1.27679	0.318765	0.464391
PTx-S3	164	177	RVHVSKEEQYYDYE	1844.85	5.28763	PTx	0	0	0
PTx-S3	164	177	RVHVSKEEQYYDYE	1844.85	5.32859	PTx	10	0.652879	0.078583
PTx-S3	164	177	RVHVSKEEQYYDYE	1844.85	5.29678	PTx	30	0.825673	0.082123	1.47855
PTx-S3	164	177	RVHVSKEEQYYDYE	1844.85	5.28763	PTx-E6290	0	0	0
PTx-S3	164	177	RVHVSKEEQYYDYE	1844.85	5.32328	PTx-E6290	10	0.568812	0.064758
PTx-S3	164	177	RVHVSKEEQYYDYE	1844.85	5.29555	PTx-E6290	30	0.64798	0.093084	1.21679	0.26176	0.279252
PTx-S3	164	181	RVHVSKEEQYYDYEDATF	2279.03	6.16704	PTx	0	0	0
PTx-S3	164	181	RVHVSKEEQYYDYEDATF	2279.03	6.21504	PTx	10	1.41105	0.101784
PTx-S3	164	181	RVHVSKEEQYYDYEDATF	2279.03	6.18337	PTx	30	1.65497	0.057163	3.06602
PTx-S3	164	181	RVHVSKEEQYYDYEDATF	2279.03	6.16704	PTx-E6290	0	0	0
PTx-S3	164	181	RVHVSKEEQYYDYEDATF	2279.03	6.20453	PTx-E6290	10	1.38838	0.094657
PTx-S3	164	181	RVHVSKEEQYYDYEDATF	2279.03	6.18154	PTx-E6290	30	1.51995	0.057901	2.90833	0.157691	0.305352
PTx-S3	165	178	VHVSKEEQYYDYED	1803.77	5.57771	PTx	0	0	0
PTx-S3	165	178	VHVSKEEQYYDYED	1803.77	5.61985	PTx	10	0.930504	0.061854
PTx-S3	165	178	VHVSKEEQYYDYED	1803.77	5.58701	PTx	30	0.99743	0.05124	1.92793
PTx-S3	165	178	VHVSKEEQYYDYED	1803.77	5.57771	PTx-E6290	0	0	0
PTx-S3	165	178	VHVSKEEQYYDYED	1803.77	5.61006	PTx-E6290	10	0.834996	0.102046
PTx-S3	165	178	VHVSKEEQYYDYED	1803.77	5.58907	PTx-E6290	30	0.890176	0.051102	1.72517	0.202762	0.306138
PTx-S3	167	174	VSKEEQYY	1045.48	5.38022	PTx	0	0	0
PTx-S3	167	174	VSKEEQYY	1045.48	5.42368	PTx	10	0.462232	0.044762
PTx-S3	167	174	VSKEEQYY	1045.48	5.39118	PTx	30	0.554189	0.04448	1.01642
PTx-S3	167	174	VSKEEQYY	1045.48	5.38022	PTx-E6290	0	0	0
PTx-S3	167	174	VSKEEQYY	1045.48	5.42087	PTx-E6290	10	0.310485	0.17157
PTx-S3	167	174	VSKEEQYY	1045.48	5.39607	PTx-E6290	30	0.465322	0.018961	0.775807	0.240614	0.51471
PTx-S3	167	177	VSKEEQYYDYE	1452.62	5.90918	PTx	0	0	0
PTx-S3	167	177	VSKEEQYYDYE	1452.62	5.95179	PTx	10	0.779766	0.022886
PTx-S3	167	177	VSKEEQYYDYE	1452.62	5.921	PTx	30	0.90126	0.051118	1.68103
PTx-S3	167	177	VSKEEQYYDYE	1452.62	5.90918	PTx-E6290	0	0	0
PTx-S3	167	177	VSKEEQYYDYE	1452.62	5.94149	PTx-E6290	10	0.759968	0.094817
PTx-S3	167	177	VSKEEQYYDYE	1452.62	5.91905	PTx-E6290	30	0.780017	0.10603	1.53998	0.141041	0.31809
PTx-S3	167	180	VSKEEQYYDYEDAT	1739.73	6.01059	PTx	0	0	0
PTx-S3	167	180	VSKEEQYYDYEDAT	1739.73	6.05164	PTx	10	1.40523	0.073355
PTx-S3	167	180	VSKEEQYYDYEDAT	1739.73	6.0221	PTx	30	1.64254	0.061407	3.04777
PTx-S3	167	180	VSKEEQYYDYEDAT	1739.73	6.01059	PTx-E6290	0	0	0
PTx-S3	167	180	VSKEEQYYDYEDAT	1739.73	6.04467	PTx-E6290	10	1.5517	0.051853
PTx-S3	167	180	VSKEEQYYDYEDAT	1739.73	6.02536	PTx-E6290	30	1.65878	0.066579	3.21048	-0.162717	0.220065
PTx-S3	171	178	EQYYDYED	1124.41	6.53213	PTx	0	0	0
PTx-S3	171	178	EQYYDYED	1124.41	6.57729	PTx	10	0.272435	0.075903
PTx-S3	171	178	EQYYDYED	1124.41	6.54178	PTx	30	0.047243	0.07114	0.319678
PTx-S3	171	178	EQYYDYED	1124.41	6.53213	PTx-E6290	0	0	0
PTx-S3	171	178	EQYYDYED	1124.41	6.56597	PTx-E6290	10	0.258304	0.149218
PTx-S3	171	178	EQYYDYED	1124.41	6.54491	PTx-E6290	30	0.022335	0.06798	0.280639	0.039039	0.447654
PTx-S3	173	180	YYDYEDAT	1039.39	6.40424	PTx	0	0	0
PTx-S3	173	180	YYDYEDAT	1039.39	6.44632	PTx	10	0.879003	0.03553
PTx-S3	173	180	YYDYEDAT	1039.39	6.41246	PTx	30	0.846506	0.037968	1.72551
PTx-S3	173	180	YYDYEDAT	1039.39	6.40424	PTx-E6290	0	0	0
PTx-S3	173	180	YYDYEDAT	1039.39	6.43415	PTx-E6290	10	0.814522	0.051678
PTx-S3	173	180	YYDYEDAT	1039.39	6.41265	PTx-E6290	30	0.756883	0.135431	1.5714	0.154104	0.406293
PTx-S3	173	181	YYDYEDATF	1186.46	7.69226	PTx	0	0	0
PTx-S3	173	181	YYDYEDATF	1186.46	7.72832	PTx	10	0.852232	0.085171
PTx-S3	173	181	YYDYEDATF	1186.46	7.69578	PTx	30	0.873579	0.082351	1.72581
PTx-S3	173	181	YYDYEDATF	1186.46	7.69226	PTx-E6290	0	0	0
PTx-S3	173	181	YYDYEDATF	1186.46	7.72038	PTx-E6290	10	0.67684	0.133283
PTx-S3	173	181	YYDYEDATF	1186.46	7.69449	PTx-E6290	30	0.790747	0.149759	1.46759	0.258224	0.449277
PTx-S3	174	181	YDYEDATF	1023.39	7.43775	PTx	0	0	0
PTx-S3	174	181	YDYEDATF	1023.39	7.47367	PTx	10	0.779003	0.063415
PTx-S3	174	181	YDYEDATF	1023.39	7.44083	PTx	30	0.801642	0.051426	1.58065
PTx-S3	174	181	YDYEDATF	1023.39	7.43775	PTx-E6290	0	0	0
PTx-S3	174	181	YDYEDATF	1023.39	7.46272	PTx-E6290	10	0.697792	0.088535
PTx-S3	174	181	YDYEDATF	1023.39	7.4438	PTx-E6290	30	0.902915	0.016173	1.60071	-0.020062	0.265605
PTx-S3	178	186	DATFQTYAL	1029.49	7.77414	PTx	0	0	0
PTx-S3	178	186	DATFQTYAL	1029.49	7.80953	PTx	10	1.25505	0.067839
PTx-S3	178	186	DATFQTYAL	1029.49	7.77427	PTx	30	1.2846	0.05073	2.53965
PTx-S3	178	186	DATFQTYAL	1029.49	7.77414	PTx-E6290	0	0	0
PTx-S3	178	186	DATFQTYAL	1029.49	7.79726	PTx-E6290	10	1.28417	0.102527
PTx-S3	178	186	DATFQTYAL	1029.49	7.77614	PTx-E6290	30	1.14336	0.022289	2.42753	0.112117	0.307581
PTx-S3	179	186	ATFQTYAL	914.462	7.33363	PTx	0	0	0
PTx-S3	179	186	ATFQTYAL	914.462	7.37495	PTx	10	0.712974	0.03924
PTx-S3	179	186	ATFQTYAL	914.462	7.3404	PTx	30	0.742587	0.016912	1.45556
PTx-S3	179	186	ATFQTYAL	914.462	7.33363	PTx-E6290	0	0	0
PTx-S3	179	186	ATFQTYAL	914.462	7.36189	PTx-E6290	10	0.687235	0.017696
PTx-S3	179	186	ATFQTYAL	914.462	7.33678	PTx-E6290	30	0.715316	0.033232	1.40255	0.05301	0.11772
PTx-S3	179	188	ATFQTYALTG	1072.53	6.99503	PTx	0	0	0
PTx-S3	179	188	ATFQTYALTG	1072.53	7.03882	PTx	10	0.822777	0.038095
PTx-S3	179	188	ATFQTYALTG	1072.53	7.00303	PTx	30	0.781906	0.105443	1.60468
PTx-S3	179	188	ATFQTYALTG	1072.53	6.99503	PTx-E6290	0	0	0
PTx-S3	179	188	ATFQTYALTG	1072.53	7.02196	PTx-E6290	10	0.765655	0.035648
PTx-S3	179	188	ATFQTYALTG	1072.53	7.00132	PTx-E6290	30	0.779183	0.041117	1.54484	0.059845	0.316329
PTx-S3	181	188	FQTYALTG	900.446	6.71687	PTx	0	0	0
PTx-S3	181	188	FQTYALTG	900.446	6.7647	PTx	10	0.221561	0.032304
PTx-S3	181	188	FQTYALTG	900.446	6.73177	PTx	30	0.15735	0.042028	0.378911
PTx-S3	181	188	FQTYALTG	900.446	6.71687	PTx-E6290	0	0	0
PTx-S3	181	188	FQTYALTG	900.446	6.75099	PTx-E6290	10	0.106378	0.06752
PTx-S3	181	188	FQTYALTG	900.446	6.73021	PTx-E6290	30	0.107448	0.105636	0.213826	0.165085	0.316908
PTx-S3	182	188	QTYALTG	753.378	5.92988	PTx	0	0	0
PTx-S3	182	188	QTYALTG	753.378	5.97473	PTx	10	0.17354	0.031559
PTx-S3	182	188	QTYALTG	753.378	5.94117	PTx	30	0.121476	0.023914	0.295016
PTx-S3	182	188	QTYALTG	753.378	5.92988	PTx-E6290	0	0	0
PTx-S3	182	188	QTYALTG	753.378	5.96082	PTx-E6290	10	0.123261	0.027009
PTx-S3	182	188	QTYALTG	753.378	5.94058	PTx-E6290	30	0.062056	0.023099	0.185317	0.109699	0.094677
PTx-S3	184	190	YALTGIS	724.388	6.55674	PTx	0	0	0
PTx-S3	184	190	YALTGIS	724.388	6.60397	PTx	10	0.287832	0.028073
PTx-S3	184	190	YALTGIS	724.388	6.56852	PTx	30	0.214629	0.028015	0.502461
PTx-S3	184	190	YALTGIS	724.388	6.55674	PTx-E6290	0	0	0
PTx-S3	184	190	YALTGIS	724.388	6.5895	PTx-E6290	10	0.188891	0.0251
PTx-S3	184	190	YALTGIS	724.388	6.56744	PTx-E6290	30	0.142969	0.037925	0.33186	0.170601	0.113775
PTx-S3	187	199	TGISLCNPAASIC	1249.59	7.67768	PTx	0	0	0
PTx-S3	187	199	TGISLCNPAASIC	1249.59	7.71025	PTx	10	2.62594	0.093676
PTx-S3	187	199	TGISLCNPAASIC	1249.59	7.67417	PTx	30	2.9379	0.069003	5.56383
PTx-S3	187	199	TGISLCNPAASIC	1249.59	7.67768	PTx-E6290	0	0	0
PTx-S3	187	199	TGISLCNPAASIC	1249.59	7.69787	PTx-E6290	10	2.5598	0.063152
PTx-S3	187	199	TGISLCNPAASIC	1249.59	7.67235	PTx-E6290	30	2.59759	0.108039	5.15739	0.406438	0.324117
PTx-S3	189	199	ISLCNPAASIC	1091.52	7.54582	PTx	0	0	0
PTx-S3	189	199	ISLCNPAASIC	1091.52	7.57532	PTx	10	3.25186	0.038091
PTx-S3	189	199	ISLCNPAASIC	1091.52	7.54253	PTx	30	3.59518	0.044947	6.84705
PTx-S3	189	199	ISLCNPAASIC	1091.52	7.54582	PTx-E6290	0	0	0
PTx-S3	189	199	ISLCNPAASIC	1091.52	7.56411	PTx-E6290	10	3.24939	0.041736
PTx-S3	189	199	ISLCNPAASIC	1091.52	7.53936	PTx-E6290	30	3.55698	0.101432	6.80636	0.040684	0.304296
PTx-S3	191	199	LCNPAASIC	891.406	6.86543	PTx	0	0	0
PTx-S3	191	199	LCNPAASIC	891.406	6.89957	PTx	10	2.81298	0.029545
PTx-S3	191	199	LCNPAASIC	891.406	6.86821	PTx	30	3.09272	0.029753	5.9057
PTx-S3	191	199	LCNPAASIC	891.406	6.86543	PTx-E6290	0	0	0
PTx-S3	191	199	LCNPAASIC	891.406	6.88247	PTx-E6290	10	3.01112	0.0417
PTx-S3	191	199	LCNPAASIC	891.406	6.865	PTx-E6290	30	2.96496	0.142813	5.97609	-0.070382	0.428439
PTx-S3	192	199	CNPAASIC	778.322	6.19122	PTx	0	0	0
PTx-S3	192	199	CNPAASIC	778.322	6.23006	PTx	10	2.46799	0.04073
PTx-S3	192	199	CNPAASIC	778.322	6.1945	PTx	30	2.6896	0.039377	5.1576
PTx-S3	192	199	CNPAASIC	778.322	6.19122	PTx-E6290	0	0	0
PTx-S3	192	199	CNPAASIC	778.322	6.21639	PTx-E6290	10	2.43917	0.040473
PTx-S3	192	199	CNPAASIC	778.322	6.19408	PTx-E6290	30	2.51315	0.096269	4.95232	0.205277	0.288807
PTx-S4	1	7	DVPYVLV	804.45	8.07338	PTx	0	0	0
PTx-S4	1	7	DVPYVLV	804.45	8.11055	PTx	10	0.197977	0.059341
PTx-S4	1	7	DVPYVLV	804.45	8.07518	PTx	30	0.327494	0.062959	0.525471
PTx-S4	1	7	DVPYVLV	804.45	8.07338	PTx-E6290	0	0	0
PTx-S4	1	7	DVPYVLV	804.45	8.09885	PTx-E6290	10	0.095853	0.113568
PTx-S4	1	7	DVPYVLV	804.45	8.0716	PTx-E6290	30	0.041881	0.062833	0.137734	0.387737	0.340704
PTx-S4	1	8	DVPYVLVK	932.545	6.22191	PTx	0	0	0
PTx-S4	1	8	DVPYVLVK	932.545	6.26694	PTx	10	0.265024	0.075212
PTx-S4	1	8	DVPYVLVK	932.545	6.23072	PTx	30	0.292839	0.043579	0.557863
PTx-S4	1	8	DVPYVLVK	932.545	6.22191	PTx-E6290	0	0	0
PTx-S4	1	8	DVPYVLVK	932.545	6.25067	PTx-E6290	10	0.20547	0.048848
PTx-S4	1	8	DVPYVLVK	932.545	6.23063	PTx-E6290	30	0.207735	0.113635	0.413205	0.144658	0.340905
PTx-S4	7	14	VKTNMVVT	891.497	4.63821	PTx	0	0	0
PTx-S4	7	14	VKTNMVVT	891.497	4.68237	PTx	10	1.04791	0.061469
PTx-S4	7	14	VKTNMVVT	891.497	4.65122	PTx	30	1.05272	0.103589	2.10063
PTx-S4	7	14	VKTNMVVT	891.497	4.63821	PTx-E6290	0	0	0
PTx-S4	7	14	VKTNMVVT	891.497	4.66557	PTx-E6290	10	1.04547	0.120576
PTx-S4	7	14	VKTNMVVT	891.497	4.65701	PTx-E6290	30	1.08904	0.060708	2.13451	-0.033882	0.361728
PTx-S4	11	28	MVVTSVAMKPYEVTPTRM	2040.03	6.26174	PTx	0	0	0
PTx-S4	11	28	MVVTSVAMKPYEVTPTRM	2040.03	6.30565	PTx	10	4.23314	0.076147
PTx-S4	11	28	MVVTSVAMKPYEVTPTRM	2040.03	6.27109	PTx	30	4.30005	0.08618	8.53319
PTx-S4	11	28	MVVTSVAMKPYEVTPTRM	2040.03	6.26174	PTx-E6290	0	0	0
PTx-S4	11	28	MVVTSVAMKPYEVTPTRM	2040.03	6.29209	PTx-E6290	10	4.04041	0.070952
PTx-S4	11	28	MVVTSVAMKPYEVTPTRM	2040.03	6.27074	PTx-E6290	30	4.10825	0.082004	8.14865	0.384534	0.25854
PTx-S4	11	29	MVVTSVAMKPYEVTPTRML	2153.12	6.67033	PTx	0	0	0
PTx-S4	11	29	MVVTSVAMKPYEVTPTRML	2153.12	6.71584	PTx	10	4.5237	0.060644
PTx-S4	11	29	MVVTSVAMKPYEVTPTRML	2153.12	6.68311	PTx	30	4.51326	0.11021	9.03696
PTx-S4	11	29	MVVTSVAMKPYEVTPTRML	2153.12	6.67033	PTx-E6290	0	0	0
PTx-S4	11	29	MVVTSVAMKPYEVTPTRML	2153.12	6.70376	PTx-E6290	10	4.25966	0.131224
PTx-S4	11	29	MVVTSVAMKPYEVTPTRML	2153.12	6.6812	PTx-E6290	30	4.27373	0.139896	8.53338	0.503578	0.419688
PTx-S4	12	18	VVTSVAM	706.38	5.94997	PTx	0	0	0
PTx-S4	12	18	VVTSVAM	706.38	5.99447	PTx	10	0.31214	0.037071
PTx-S4	12	18	VVTSVAM	706.38	5.96201	PTx	30	0.251336	0.032865	0.563476
PTx-S4	12	18	VVTSVAM	706.38	5.94997	PTx-E6290	0	0	0
PTx-S4	12	18	VVTSVAM	706.38	5.98179	PTx-E6290	10	0.183021	0.024916
PTx-S4	12	18	VVTSVAM	706.38	5.96053	PTx-E6290	30	0.152138	0.039228	0.335159	0.228317	0.117684
PTx-S4	12	29	VVTSVAMKPYEVTPTRML	2022.08	6.41481	PTx	0	0	0
PTx-S4	12	29	VVTSVAMKPYEVTPTRML	2022.08	6.45852	PTx	10	4.43621	0.109591
PTx-S4	12	29	VVTSVAMKPYEVTPTRML	2022.08	6.42363	PTx	30	4.44284	0.128262	8.87905
PTx-S4	12	29	VVTSVAMKPYEVTPTRML	2022.08	6.41481	PTx-E6290	0	0	0
PTx-S4	12	29	VVTSVAMKPYEVTPTRML	2022.08	6.44521	PTx-E6290	10	4.2216	0.096296
PTx-S4	12	29	VVTSVAMKPYEVTPTRML	2022.08	6.42301	PTx-E6290	30	4.18259	0.090936	8.40419	0.474861	0.384786
PTx-S4	13	28	VTSVAMKPYEVTPTRM	1809.92	5.94851	PTx	0	0	0
PTx-S4	13	28	VTSVAMKPYEVTPTRM	1809.92	5.98909	PTx	10	3.75236	0.082378
PTx-S4	13	28	VTSVAMKPYEVTPTRM	1809.92	5.95811	PTx	30	3.87887	0.084071	7.63123
PTx-S4	13	28	VTSVAMKPYEVTPTRM	1809.92	5.94851	PTx-E6290	0	0	0
PTx-S4	13	28	VTSVAMKPYEVTPTRM	1809.92	5.97789	PTx-E6290	10	3.71417	0.105912
PTx-S4	13	28	VTSVAMKPYEVTPTRM	1809.92	5.95857	PTx-E6290	30	3.57601	0.190719	7.29018	0.341045	0.572157
PTx-S4	14	28	TSVAMKPYEVTPTRM	1710.86	5.95051	PTx	0	0	0
PTx-S4	14	28	TSVAMKPYEVTPTRM	1710.86	5.99046	PTx	10	3.14312	0.034451
PTx-S4	14	28	TSVAMKPYEVTPTRM	1710.86	5.96013	PTx	30	3.2076	0.035648	6.35073
PTx-S4	14	28	TSVAMKPYEVTPTRM	1710.86	5.95051	PTx-E6290	0	0	0
PTx-S4	14	28	TSVAMKPYEVTPTRM	1710.86	5.97912	PTx-E6290	10	3.04203	0.056562
PTx-S4	14	28	TSVAMKPYEVTPTRM	1710.86	5.95837	PTx-E6290	30	2.94446	0.099979	5.98649	0.364239	0.299937
PTx-S4	16	29	VAMKPYEVTPTRML	1635.86	6.13236	PTx	0	0	0
PTx-S4	16	29	VAMKPYEVTPTRML	1635.86	6.17772	PTx	10	3.56425	0.071814
PTx-S4	16	29	VAMKPYEVTPTRML	1635.86	6.14308	PTx	30	3.64386	0.044463	7.2081
PTx-S4	16	29	VAMKPYEVTPTRML	1635.86	6.13236	PTx-E6290	0	0	0
PTx-S4	16	29	VAMKPYEVTPTRML	1635.86	6.16335	PTx-E6290	10	3.48463	0.082493
PTx-S4	16	29	VAMKPYEVTPTRML	1635.86	6.14295	PTx-E6290	30	3.28339	0.13102	6.76802	0.440085	0.39306
PTx-S4	17	28	AMKPYEVTPTRM	1423.71	5.43188	PTx	0	0	0
PTx-S4	17	28	AMKPYEVTPTRM	1423.71	5.47315	PTx	10	3.39369	0.089695
PTx-S4	17	28	AMKPYEVTPTRM	1423.71	5.43755	PTx	30	3.53707	0.115246	6.93076
PTx-S4	17	28	AMKPYEVTPTRM	1423.71	5.43188	PTx-E6290	0	0	0
PTx-S4	17	28	AMKPYEVTPTRM	1423.71	5.46088	PTx-E6290	10	3.4721	0.064008
PTx-S4	17	28	AMKPYEVTPTRM	1423.71	5.43696	PTx-E6290	30	3.40597	0.153436	6.87808	0.052687	0.460308
PTx-S4	18	28	MKPYEVTPTRM	1352.67	5.38661	PTx	0	0	0
PTx-S4	18	28	MKPYEVTPTRM	1352.67	5.42705	PTx	10	3.38017	0.037325
PTx-S4	18	28	MKPYEVTPTRM	1352.67	5.39135	PTx	30	3.49448	0.040241	6.87465
PTx-S4	18	28	MKPYEVTPTRM	1352.67	5.38661	PTx-E6290	0	0	0
PTx-S4	18	28	MKPYEVTPTRM	1352.67	5.41494	PTx-E6290	10	3.37649	0.055665
PTx-S4	18	28	MKPYEVTPTRM	1352.67	5.39004	PTx-E6290	30	3.43279	0.040564	6.80928	0.06537	0.166995
PTx-S4	18	29	MKPYEVTPTRML	1465.75	5.99373	PTx	0	0	0
PTx-S4	18	29	MKPYEVTPTRML	1465.75	6.03913	PTx	10	3.22822	0.104138
PTx-S4	18	29	MKPYEVTPTRML	1465.75	6.00682	PTx	30	3.44487	0.038232	6.67308
PTx-S4	18	29	MKPYEVTPTRML	1465.75	5.99373	PTx-E6290	0	0	0
PTx-S4	18	29	MKPYEVTPTRML	1465.75	6.02833	PTx-E6290	10	3.25812	0.06937
PTx-S4	18	29	MKPYEVTPTRML	1465.75	6.00495	PTx-E6290	30	3.2209	0.091282	6.47902	0.194061	0.312414
PTx-S4	20	28	PYEVTPTRM	1093.53	5.57422	PTx	0	0	0
PTx-S4	20	28	PYEVTPTRM	1093.53	5.61634	PTx	10	3.3047	0.040399
PTx-S4	20	28	PYEVTPTRM	1093.53	5.5828	PTx	30	3.38059	0.031128	6.68529
PTx-S4	20	28	PYEVTPTRM	1093.53	5.57422	PTx-E6290	0	0	0
PTx-S4	20	28	PYEVTPTRM	1093.53	5.60385	PTx-E6290	10	3.1434	0.084772
PTx-S4	20	28	PYEVTPTRM	1093.53	5.58304	PTx-E6290	30	3.34275	0.198166	6.48616	0.199131	0.594498
PTx-S4	21	27	YEVTPTR	865.441	4.5797	PTx	0	0	0
PTx-S4	21	27	YEVTPTR	865.441	4.6165	PTx	10	2.31013	0.025068
PTx-S4	21	27	YEVTPTR	865.441	4.57593	PTx	30	2.37896	0.070199	4.6891
PTx-S4	21	27	YEVTPTR	865.441	4.5797	PTx-E6290	0	0	0
PTx-S4	21	27	YEVTPTR	865.441	4.58976	PTx-E6290	10	2.25622	0.116305
PTx-S4	21	27	YEVTPTR	865.441	4.57614	PTx-E6290	30	2.23717	0.031788	4.49338	0.195711	0.348915
PTx-S4	21	28	YEVTPTRM	996.482	5.42319	PTx	0	0	0
PTx-S4	21	28	YEVTPTRM	996.482	5.46261	PTx	10	2.67578	0.071354
PTx-S4	21	28	YEVTPTRM	996.482	5.42963	PTx	30	2.79371	0.060646	5.46949
PTx-S4	21	28	YEVTPTRM	996.482	5.42319	PTx-E6290	0	0	0
PTx-S4	21	28	YEVTPTRM	996.482	5.45328	PTx-E6290	10	2.54106	0.09489
PTx-S4	21	28	YEVTPTRM	996.482	5.42875	PTx-E6290	30	2.60528	0.10789	5.14634	0.323156	0.32367
PTx-S4	22	28	EVTPTRM	833.419	4.71392	PTx	0	0	0
PTx-S4	22	28	EVTPTRM	833.419	4.74761	PTx	10	2.17145	0.044424
PTx-S4	22	28	EVTPTRM	833.419	4.71119	PTx	30	2.27085	0.045973	4.4423
PTx-S4	22	28	EVTPTRM	833.419	4.71392	PTx-E6290	0	0	0
PTx-S4	22	28	EVTPTRM	833.419	4.72354	PTx-E6290	10	2.15278	0.049005
PTx-S4	22	28	EVTPTRM	833.419	4.71251	PTx-E6290	30	2.20904	0.051267	4.36182	0.080481	0.153801
PTx-S4	23	41	VTPTRMLVCGIAAKLGAAA	1843.03	6.1821	PTx	0	0	0
PTx-S4	23	41	VTPTRMLVCGIAAKLGAAA	1843.03	6.23104	PTx	10	1.33428	0.04489
PTx-S4	23	41	VTPTRMLVCGIAAKLGAAA	1843.03	6.19852	PTx	30	1.31357	0.057624	2.64785
PTx-S4	23	41	VTPTRMLVCGIAAKLGAAA	1843.03	6.1821	PTx-E6290	0	0	0
PTx-S4	23	41	VTPTRMLVCGIAAKLGAAA	1843.03	6.21949	PTx-E6290	10	0.977896	0.116899
PTx-S4	23	41	VTPTRMLVCGIAAKLGAAA	1843.03	6.19605	PTx-E6290	30	0.989083	0.109317	1.96698	0.680872	0.350697
PTx-S4	30	36	VCGIAAK	661.37	5.87292	PTx	0	0	0
PTx-S4	30	36	VCGIAAK	661.37	5.92169	PTx	10	0.15803	0.047201
PTx-S4	30	36	VCGIAAK	661.37	5.88833	PTx	30	0.082308	0.033686	0.240338
PTx-S4	30	36	VCGIAAK	661.37	5.87292	PTx-E6290	0	0	0
PTx-S4	30	36	VCGIAAK	661.37	5.90919	PTx-E6290	10	0.06572	0.035476
PTx-S4	30	36	VCGIAAK	661.37	5.88691	PTx-E6290	30	-0.005309	0.050083	0.060411	0.179927	0.150249
PTx-S4	31	39	CGIAAKLGA	803.444	4.98182	PTx	0	0	0
PTx-S4	31	39	CGIAAKLGA	803.444	5.00427	PTx	10	0.662362	0.19243
PTx-S4	31	39	CGIAAKLGA	803.444	4.9824	PTx	30	0.596323	0.206891	1.25869
PTx-S4	31	39	CGIAAKLGA	803.444	4.98182	PTx-E6290	0	0	0
PTx-S4	31	39	CGIAAKLGA	803.444	4.99686	PTx-E6290	10	0.632485	0.172515
PTx-S4	31	39	CGIAAKLGA	803.444	4.98767	PTx-E6290	30	0.498376	0.16094	1.13086	0.127824	0.620673
PTx-S4	32	51	GIAAKLGAAASSPDAHVPFC	1882.95	6.56029	PTx	0	0	0
PTx-S4	32	51	GIAAKLGAAASSPDAHVPFC	1882.95	6.60107	PTx	10	4.21195	0.056909
PTx-S4	32	51	GIAAKLGAAASSPDAHVPFC	1882.95	6.5667	PTx	30	4.41462	0.063775	8.62658
PTx-S4	32	51	GIAAKLGAAASSPDAHVPFC	1882.95	6.56029	PTx-E6290	0	0	0
PTx-S4	32	51	GIAAKLGAAASSPDAHVPFC	1882.95	6.58563	PTx-E6290	10	4.18282	0.036601
PTx-S4	32	51	GIAAKLGAAASSPDAHVPFC	1882.95	6.56556	PTx-E6290	30	4.25416	0.061637	8.43698	0.189596	0.191325
PTx-S4	32	52	GIAAKLGAAASSPDAHVPFCF	2030.02	7.15452	PTx	0	0	0
PTx-S4	32	52	GIAAKLGAAASSPDAHVPFCF	2030.02	7.21653	PTx	10	4.21718	0.134354
PTx-S4	32	52	GIAAKLGAAASSPDAHVPFCF	2030.02	7.18412	PTx	30	4.25778	0.122098	8.47496
PTx-S4	32	52	GIAAKLGAAASSPDAHVPFCF	2030.02	7.15452	PTx-E6290	0	0	0
PTx-S4	32	52	GIAAKLGAAASSPDAHVPFCF	2030.02	7.20418	PTx-E6290	10	4.19806	0.155882
PTx-S4	32	52	GIAAKLGAAASSPDAHVPFCF	2030.02	7.18082	PTx-E6290	30	4.06594	0.128246	8.264	0.210965	0.467646
PTx-S4	32	55	GIAAKLGAAASSPDAHVPFCFGKD	2330.16	6.48161	PTx	0	0	0
PTx-S4	32	55	GIAAKLGAAASSPDAHVPFCFGKD	2330.16	6.52218	PTx	10	5.12018	0.065743
PTx-S4	32	55	GIAAKLGAAASSPDAHVPFCFGKD	2330.16	6.48814	PTx	30	5.23364	0.077605	10.3538
PTx-S4	32	55	GIAAKLGAAASSPDAHVPFCFGKD	2330.16	6.48161	PTx-E6290	0	0	0
PTx-S4	32	55	GIAAKLGAAASSPDAHVPFCFGKD	2330.16	6.51068	PTx-E6290	10	4.92542	0.163276
PTx-S4	32	55	GIAAKLGAAASSPDAHVPFCFGKD	2330.16	6.48799	PTx-E6290	30	5.07968	0.096754	10.0051	0.348732	0.489828
PTx-S4	35	49	AKLGAAASSPDAHVP	1391.73	4.98562	PTx	0	0	0
PTx-S4	35	49	AKLGAAASSPDAHVP	1391.73	5.03377	PTx	10	3.18335	0.068917
PTx-S4	35	49	AKLGAAASSPDAHVP	1391.73	5.00842	PTx	30	3.49046	0.139745	6.67382
PTx-S4	35	49	AKLGAAASSPDAHVP	1391.73	4.98562	PTx-E6290	0	0	0
PTx-S4	35	49	AKLGAAASSPDAHVP	1391.73	5.03128	PTx-E6290	10	3.20679	0.170293
PTx-S4	35	49	AKLGAAASSPDAHVP	1391.73	5.00614	PTx-E6290	30	3.3617	0.160963	6.56849	0.105326	0.510879
PTx-S4	35	51	AKLGAAASSPDAHVPFC	1641.81	6.00608	PTx	0	0	0
PTx-S4	35	51	AKLGAAASSPDAHVPFC	1641.81	6.05058	PTx	10	3.21451	0.039794
PTx-S4	35	51	AKLGAAASSPDAHVPFC	1641.81	6.01945	PTx	30	3.3556	0.062621	6.57011
PTx-S4	35	51	AKLGAAASSPDAHVPFC	1641.81	6.00608	PTx-E6290	0	0	0
PTx-S4	35	51	AKLGAAASSPDAHVPFC	1641.81	6.03915	PTx-E6290	10	3.23398	0.044036
PTx-S4	35	51	AKLGAAASSPDAHVPFC	1641.81	6.01783	PTx-E6290	30	2.97302	0.083117	6.20701	0.363104	0.249351
PTx-S4	35	52	AKLGAAASSPDAHVPFCF	1788.87	6.8827	PTx	0	0	0
PTx-S4	35	52	AKLGAAASSPDAHVPFCF	1788.87	6.92643	PTx	10	3.37833	0.041701
PTx-S4	35	52	AKLGAAASSPDAHVPFCF	1788.87	6.89556	PTx	30	3.42064	0.071265	6.79898
PTx-S4	35	52	AKLGAAASSPDAHVPFCF	1788.87	6.8827	PTx-E6290	0	0	0
PTx-S4	35	52	AKLGAAASSPDAHVPFCF	1788.87	6.91234	PTx-E6290	10	3.34542	0.043799
PTx-S4	35	52	AKLGAAASSPDAHVPFCF	1788.87	6.89336	PTx-E6290	30	3.33214	0.05263	6.67755	0.121424	0.213795
PTx-S4	35	55	AKLGAAASSPDAHVPFCFGKD	2089.02	5.99673	PTx	0	0	0
PTx-S4	35	55	AKLGAAASSPDAHVPFCFGKD	2089.02	6.04169	PTx	10	4.17721	0.037979
PTx-S4	35	55	AKLGAAASSPDAHVPFCFGKD	2089.02	6.01117	PTx	30	4.34181	0.080126	8.51902
PTx-S4	35	55	AKLGAAASSPDAHVPFCFGKD	2089.02	5.99673	PTx-E6290	0	0	0
PTx-S4	35	55	AKLGAAASSPDAHVPFCFGKD	2089.02	6.03129	PTx-E6290	10	4.1044	0.039823
PTx-S4	35	55	AKLGAAASSPDAHVPFCFGKD	2089.02	6.00868	PTx-E6290	30	4.10291	0.133538	8.20731	0.311712	0.400614
PTx-S4	36	52	KLGAAASSPDAHVPFCF	1717.84	6.87539	PTx	0	0	0
PTx-S4	36	52	KLGAAASSPDAHVPFCF	1717.84	6.91904	PTx	10	2.8572	0.025601
PTx-S4	36	52	KLGAAASSPDAHVPFCF	1717.84	6.8907	PTx	30	2.85382	0.115138	5.71102
PTx-S4	36	52	KLGAAASSPDAHVPFCF	1717.84	6.87539	PTx-E6290	0	0	0
PTx-S4	36	52	KLGAAASSPDAHVPFCF	1717.84	6.90527	PTx-E6290	10	2.61049	0.049173
PTx-S4	36	52	KLGAAASSPDAHVPFCF	1717.84	6.88642	PTx-E6290	30	2.57526	0.057046	5.18575	0.525272	0.345414
PTx-S4	38	52	GAAASSPDAHVPFCF	1476.66	7.41966	PTx	0	0	0
PTx-S4	38	52	GAAASSPDAHVPFCF	1476.66	7.46291	PTx	10	2.05169	0.026934
PTx-S4	38	52	GAAASSPDAHVPFCF	1476.66	7.4306	PTx	30	2.04898	0.06319	4.10067
PTx-S4	38	52	GAAASSPDAHVPFCF	1476.66	7.41966	PTx-E6290	0	0	0
PTx-S4	38	52	GAAASSPDAHVPFCF	1476.66	7.45232	PTx-E6290	10	1.90329	0.065162
PTx-S4	38	52	GAAASSPDAHVPFCF	1476.66	7.42622	PTx-E6290	30	2.00999	0.189032	3.91328	0.187391	0.567096
PTx-S4	41	50	ASSPDAHVPF	1027.48	5.93428	PTx	0	0	0
PTx-S4	41	50	ASSPDAHVPF	1027.48	5.98126	PTx	10	0.896641	0.023591
PTx-S4	41	50	ASSPDAHVPF	1027.48	5.94905	PTx	30	0.926422	0.060793	1.82306
PTx-S4	41	50	ASSPDAHVPF	1027.48	5.93428	PTx-E6290	0	0	0
PTx-S4	41	50	ASSPDAHVPF	1027.48	5.96736	PTx-E6290	10	0.810052	0.100537
PTx-S4	41	50	ASSPDAHVPF	1027.48	5.94261	PTx-E6290	30	0.963986	0.039518	1.77404	0.049025	0.301611
PTx-S4	41	51	ASSPDAHVPFC	1130.49	6.33331	PTx	0	0	0
PTx-S4	41	51	ASSPDAHVPFC	1130.49	6.38144	PTx	10	0.682148	0.059288
PTx-S4	41	51	ASSPDAHVPFC	1130.49	6.34675	PTx	30	0.653071	0.052946	1.33522
PTx-S4	41	51	ASSPDAHVPFC	1130.49	6.33331	PTx-E6290	0	0	0
PTx-S4	41	51	ASSPDAHVPFC	1130.49	6.36789	PTx-E6290	10	0.630331	0.03371
PTx-S4	41	51	ASSPDAHVPFC	1130.49	6.34844	PTx-E6290	30	0.645124	0.046361	1.27546	0.059764	0.177864
PTx-S4	41	52	ASSPDAHVPFCF	1277.56	7.43484	PTx	0	0	0
PTx-S4	41	52	ASSPDAHVPFCF	1277.56	7.47602	PTx	10	0.948717	0.044026
PTx-S4	41	52	ASSPDAHVPFCF	1277.56	7.44399	PTx	30	0.967285	0.048887	1.916
PTx-S4	41	52	ASSPDAHVPFCF	1277.56	7.43484	PTx-E6290	0	0	0
PTx-S4	41	52	ASSPDAHVPFCF	1277.56	7.46532	PTx-E6290	10	0.881579	0.04696
PTx-S4	41	52	ASSPDAHVPFCF	1277.56	7.44061	PTx-E6290	30	0.802452	0.08032	1.68403	0.231971	0.24096
PTx-S4	41	54	ASSPDAHVPFCFGK	1462.68	6.14884	PTx	0	0	0
PTx-S4	41	54	ASSPDAHVPFCFGK	1462.68	6.19646	PTx	10	1.59002	0.038131
PTx-S4	41	54	ASSPDAHVPFCFGK	1462.68	6.16382	PTx	30	1.57121	0.072022	3.16123
PTx-S4	41	54	ASSPDAHVPFCFGK	1462.68	6.14884	PTx-E6290	0	0	0
PTx-S4	41	54	ASSPDAHVPFCFGK	1462.68	6.18368	PTx-E6290	10	1.40427	0.066039
PTx-S4	41	54	ASSPDAHVPFCFGK	1462.68	6.16163	PTx-E6290	30	1.32137	0.088712	2.72564	0.435596	0.266136
PTx-S4	52	65	FGKDLKRPGSSPME	1548.78	4.785	PTx	0	0	0
PTx-S4	52	65	FGKDLKRPGSSPME	1548.78	4.81154	PTx	10	3.32973	0.101952
PTx-S4	52	65	FGKDLKRPGSSPME	1548.78	4.77271	PTx	30	3.29346	0.14552	6.62319
PTx-S4	52	65	FGKDLKRPGSSPME	1548.78	4.785	PTx-E6290	0	0	0
PTx-S4	52	65	FGKDLKRPGSSPME	1548.78	4.78474	PTx-E6290	10	3.24763	0.113151
PTx-S4	52	65	FGKDLKRPGSSPME	1548.78	4.77409	PTx-E6290	30	3.18246	0.097513	6.43009	0.193095	0.43656
PTx-S4	55	61	DLKRPGS	772.431	4.58415	PTx	0	0	0
PTx-S4	55	61	DLKRPGS	772.431	4.503	PTx	10	0.2363	0.050694
PTx-S4	55	61	DLKRPGS	772.431	4.46499	PTx	30	0.214328	0.057569	0.450628
PTx-S4	55	61	DLKRPGS	772.431	4.58415	PTx-E6290	0	0	0
PTx-S4	55	61	DLKRPGS	772.431	4.51174	PTx-E6290	10	0.136185	0.073308
PTx-S4	55	61	DLKRPGS	772.431	4.46499	PTx-E6290	30	0.167617	0.058213	0.303802	0.146826	0.219924
PTx-S4	55	64	DLKRPGSSPM	1087.56	4.72837	PTx	0	0	0
PTx-S4	55	64	DLKRPGSSPM	1087.56	4.76944	PTx	10	2.48149	0.045057
PTx-S4	55	64	DLKRPGSSPM	1087.56	4.73512	PTx	30	2.50115	0.053727	4.98264
PTx-S4	55	64	DLKRPGSSPM	1087.56	4.72837	PTx-E6290	0	0	0
PTx-S4	55	64	DLKRPGSSPM	1087.56	4.74419	PTx-E6290	10	2.47531	0.081186
PTx-S4	55	64	DLKRPGSSPM	1087.56	4.72989	PTx-E6290	30	2.35745	0.054791	4.83276	0.149887	0.243558
PTx-S4	55	67	DLKRPGSSPMEVM	1446.71	5.8302	PTx	0	0	0
PTx-S4	55	67	DLKRPGSSPMEVM	1446.71	5.87193	PTx	10	2.1831	0.043547
PTx-S4	55	67	DLKRPGSSPMEVM	1446.71	5.83904	PTx	30	2.18267	0.072917	4.36577
PTx-S4	55	67	DLKRPGSSPMEVM	1446.71	5.8302	PTx-E6290	0	0	0
PTx-S4	55	67	DLKRPGSSPMEVM	1446.71	5.86098	PTx-E6290	10	2.12356	0.097588
PTx-S4	55	67	DLKRPGSSPMEVM	1446.71	5.83924	PTx-E6290	30	1.95532	0.055807	4.07888	0.286887	0.292764
PTx-S4	56	65	LKRPGSSPME	1101.57	4.29368	PTx	0	0	0
PTx-S4	56	65	LKRPGSSPME	1101.57	4.33472	PTx	10	2.09502	0.083894
PTx-S4	56	65	LKRPGSSPME	1101.57	4.28546	PTx	30	2.10624	0.048969	4.20126
PTx-S4	56	65	LKRPGSSPME	1101.57	4.29368	PTx-E6290	0	0	0
PTx-S4	56	65	LKRPGSSPME	1101.57	4.30122	PTx-E6290	10	2.04001	0.048107
PTx-S4	56	65	LKRPGSSPME	1101.57	4.28516	PTx-E6290	30	2.00974	0.057233	4.04975	0.151506	0.251682
PTx-S4	56	67	LKRPGSSPMEVM	1331.68	5.42863	PTx	0	0	0
PTx-S4	56	67	LKRPGSSPMEVM	1331.68	5.47208	PTx	10	1.6691	0.04896
PTx-S4	56	67	LKRPGSSPMEVM	1331.68	5.43789	PTx	30	1.696	0.040574	3.3651
PTx-S4	56	67	LKRPGSSPMEVM	1331.68	5.42863	PTx-E6290	0	0	0
PTx-S4	56	67	LKRPGSSPMEVM	1331.68	5.45932	PTx-E6290	10	1.60763	0.03951
PTx-S4	56	67	LKRPGSSPMEVM	1331.68	5.43595	PTx-E6290	30	1.5767	0.088176	3.18433	0.180771	0.264528
PTx-S4	60	67	GSSPMEVM	837.348	6.71329	PTx	0	0	0
PTx-S4	60	67	GSSPMEVM	837.348	6.76087	PTx	10	0.863058	0.034551
PTx-S4	60	67	GSSPMEVM	837.348	6.72604	PTx	30	0.888558	0.018764	1.75162
PTx-S4	60	67	GSSPMEVM	837.348	6.71329	PTx-E6290	0	0	0
PTx-S4	60	67	GSSPMEVM	837.348	6.74749	PTx-E6290	10	0.819527	0.131805
PTx-S4	60	67	GSSPMEVM	837.348	6.72818	PTx-E6290	30	0.923226	0.016116	1.74275	0.008863	0.395415
PTx-S4	62	70	SPMEVMLRA	1033.52	4.971	PTx	0	0	0
PTx-S4	62	70	SPMEVMLRA	1033.52	5.00775	PTx	10	1.07737	0.044831
PTx-S4	62	70	SPMEVMLRA	1033.52	4.98322	PTx	30	1.12913	0.037377	2.2065
PTx-S4	62	70	SPMEVMLRA	1033.52	4.971	PTx-E6290	0	0	0
PTx-S4	62	70	SPMEVMLRA	1033.52	4.9985	PTx-E6290	10	1.04087	0.056676
PTx-S4	62	70	SPMEVMLRA	1033.52	4.981	PTx-E6290	30	1.01005	0.052923	2.05092	0.155575	0.170028
PTx-S4	71	80	VFMQQRPLRM	1305.69	5.71125	PTx	0	0	0
PTx-S4	71	80	VFMQQRPLRM	1305.69	5.75905	PTx	10	0.509496	0.101853
PTx-S4	71	80	VFMQQRPLRM	1305.69	5.72488	PTx	30	0.452559	0.066955	0.962055
PTx-S4	71	80	VFMQQRPLRM	1305.69	5.71125	PTx-E6290	0	0	0
PTx-S4	71	80	VFMQQRPLRM	1305.69	5.7448	PTx-E6290	10	0.319708	0.09448
PTx-S4	71	80	VFMQQRPLRM	1305.69	5.72404	PTx-E6290	30	0.282792	0.101589	0.6025	0.359555	0.305559
PTx-S4	73	79	MQQRPLR	928.514	4.73223	PTx	0	0	0
PTx-S4	73	79	MQQRPLR	928.514	4.76185	PTx	10	0.309883	0.13073
PTx-S4	73	79	MQQRPLR	928.514	4.70352	PTx	30	0.24671	0.093681	0.556593
PTx-S4	73	79	MQQRPLR	928.514	4.73223	PTx-E6290	0	0	0
PTx-S4	73	79	MQQRPLR	928.514	4.71343	PTx-E6290	10	0.205107	0.103024
PTx-S4	73	79	MQQRPLR	928.514	4.70011	PTx-E6290	30	0.109558	0.11902	0.314665	0.241928	0.39219
PTx-S4	73	80	MQQRPLRM	1059.56	4.72332	PTx	0	0	0
PTx-S4	73	80	MQQRPLRM	1059.56	4.76028	PTx	10	0.243421	0.079733
PTx-S4	73	80	MQQRPLRM	1059.56	4.70061	PTx	30	0.154133	0.088522	0.397554
PTx-S4	73	80	MQQRPLRM	1059.56	4.72332	PTx-E6290	0	0	0
PTx-S4	73	80	MQQRPLRM	1059.56	4.71193	PTx-E6290	10	0.097175	0.097317
PTx-S4	73	80	MQQRPLRM	1059.56	4.70211	PTx-E6290	30	0.083124	0.09379	0.180299	0.217255	0.291951
PTx-S4	73	82	MQQRPLRMFL	1319.71	6.53628	PTx	0	0	0
PTx-S4	73	82	MQQRPLRMFL	1319.71	6.59078	PTx	10	0.269734	0.031848
PTx-S4	73	82	MQQRPLRMFL	1319.71	6.55945	PTx	30	0.162007	0.027218	0.431741
PTx-S4	73	82	MQQRPLRMFL	1319.71	6.53628	PTx-E6290	0	0	0
PTx-S4	73	82	MQQRPLRMFL	1319.71	6.58261	PTx-E6290	10	0.177958	0.027678
PTx-S4	73	82	MQQRPLRMFL	1319.71	6.55809	PTx-E6290	30	0.042215	0.031922	0.220173	0.211568	0.095766
PTx-S4	73	96	MQQRPLRMFLGPKQLTFEGKPALE	2815.51	6.47401	PTx	0	0	0
PTx-S4	73	96	MQQRPLRMFLGPKQLTFEGKPALE	2815.51	6.52282	PTx	10	4.31579	0.12146
PTx-S4	73	96	MQQRPLRMFLGPKQLTFEGKPALE	2815.51	6.48901	PTx	30	4.61111	0.141592	8.92691
PTx-S4	73	96	MQQRPLRMFLGPKQLTFEGKPALE	2815.51	6.47401	PTx-E6290	0	0	0
PTx-S4	73	96	MQQRPLRMFLGPKQLTFEGKPALE	2815.51	6.51102	PTx-E6290	10	3.72909	0.131569
PTx-S4	73	96	MQQRPLRMFLGPKQLTFEGKPALE	2815.51	6.49214	PTx-E6290	30	4.1387	0.101114	7.86779	1.05912	0.424776
PTx-S4	73	97	MQQRPLRMFLGPKQLTFEGKPALEL	2928.59	6.90408	PTx	0	0	0
PTx-S4	73	97	MQQRPLRMFLGPKQLTFEGKPALEL	2928.59	6.94699	PTx	10	3.68804	0.082706
PTx-S4	73	97	MQQRPLRMFLGPKQLTFEGKPALEL	2928.59	6.91751	PTx	30	3.99179	0.092976	7.67983
PTx-S4	73	97	MQQRPLRMFLGPKQLTFEGKPALEL	2928.59	6.90408	PTx-E6290	0	0	0
PTx-S4	73	97	MQQRPLRMFLGPKQLTFEGKPALEL	2928.59	6.93575	PTx-E6290	10	3.2228	0.049678
PTx-S4	73	97	MQQRPLRMFLGPKQLTFEGKPALEL	2928.59	6.92	PTx-E6290	30	3.42347	0.094638	6.64627	1.03356	0.283914
PTx-S4	74	80	QQRPLRM	928.514	4.37143	PTx	0	0	0
PTx-S4	74	80	QQRPLRM	928.514	4.33737	PTx	10	0.319805	0.11315
PTx-S4	74	80	QQRPLRM	928.514	4.30415	PTx	30	0.208729	0.058221	0.528534
PTx-S4	74	80	QQRPLRM	928.514	4.37143	PTx-E6290	0	0	0
PTx-S4	74	80	QQRPLRM	928.514	4.31875	PTx-E6290	10	0.098063	0.074123
PTx-S4	74	80	QQRPLRM	928.514	4.30316	PTx-E6290	30	0.060012	0.078354	0.158075	0.370459	0.33945
PTx-S4	78	86	LRMFLGPKQ	1089.62	5.81865	PTx	0	0	0
PTx-S4	78	86	LRMFLGPKQ	1089.62	5.86591	PTx	10	1.20047	0.066855
PTx-S4	78	86	LRMFLGPKQ	1089.62	5.833	PTx	30	1.30902	0.072759	2.50949
PTx-S4	78	86	LRMFLGPKQ	1089.62	5.81865	PTx-E6290	0	0	0
PTx-S4	78	86	LRMFLGPKQ	1089.62	5.8536	PTx-E6290	10	0.972758	0.103953
PTx-S4	78	86	LRMFLGPKQ	1089.62	5.83222	PTx-E6290	30	1.10382	0.11694	2.07658	0.432911	0.35082
PTx-S4	79	97	RMFLGPKQLTFEGKPALEL	2175.2	6.82498	PTx	0	0	0
PTx-S4	79	97	RMFLGPKQLTFEGKPALEL	2175.2	6.86734	PTx	10	3.55222	0.149144
PTx-S4	79	97	RMFLGPKQLTFEGKPALEL	2175.2	6.83905	PTx	30	4.00908	0.14404	7.5613
PTx-S4	79	97	RMFLGPKQLTFEGKPALEL	2175.2	6.82498	PTx-E6290	0	0	0
PTx-S4	79	97	RMFLGPKQLTFEGKPALEL	2175.2	6.85295	PTx-E6290	10	3.41292	0.059078
PTx-S4	79	97	RMFLGPKQLTFEGKPALEL	2175.2	6.8404	PTx-E6290	30	3.66697	0.058461	7.0799	0.481406	0.447432
PTx-S4	80	87	MFLGPKQL	933.523	6.46331	PTx	0	0	0
PTx-S4	80	87	MFLGPKQL	933.523	6.51258	PTx	10	1.09789	0.030122
PTx-S4	80	87	MFLGPKQL	933.523	6.47768	PTx	30	1.21704	0.079613	2.31492
PTx-S4	80	87	MFLGPKQL	933.523	6.46331	PTx-E6290	0	0	0
PTx-S4	80	87	MFLGPKQL	933.523	6.50052	PTx-E6290	10	0.876749	0.08736
PTx-S4	80	87	MFLGPKQL	933.523	6.47684	PTx-E6290	30	0.890272	0.031029	1.76702	0.547903	0.26208
PTx-S4	81	87	FLGPKQL	802.482	5.8971	PTx	0	0	0
PTx-S4	81	87	FLGPKQL	802.482	5.94002	PTx	10	0.865743	0.108433
PTx-S4	81	87	FLGPKQL	802.482	5.90604	PTx	30	0.953423	0.091533	1.81917
PTx-S4	81	87	FLGPKQL	802.482	5.8971	PTx-E6290	0	0	0
PTx-S4	81	87	FLGPKQL	802.482	5.92704	PTx-E6290	10	0.674121	0.092921
PTx-S4	81	87	FLGPKQL	802.482	5.90415	PTx-E6290	30	0.775492	0.094496	1.44961	0.369553	0.325299
PTx-S4	81	89	FLGPKQLTF	1050.6	6.94089	PTx	0	0	0
PTx-S4	81	89	FLGPKQLTF	1050.6	6.98101	PTx	10	2.00453	0.141651
PTx-S4	81	89	FLGPKQLTF	1050.6	6.95168	PTx	30	2.27446	0.144918	4.27899
PTx-S4	81	89	FLGPKQLTF	1050.6	6.94089	PTx-E6290	0	0	0
PTx-S4	81	89	FLGPKQLTF	1050.6	6.96944	PTx-E6290	10	1.67477	0.137743
PTx-S4	81	89	FLGPKQLTF	1050.6	6.94968	PTx-E6290	30	1.94485	0.143349	3.61962	0.659374	0.434754
PTx-S4	81	90	FLGPKQLTFE	1179.64	6.80436	PTx	0	0	0
PTx-S4	81	90	FLGPKQLTFE	1179.64	6.8448	PTx	10	2.41419	0.102152
PTx-S4	81	90	FLGPKQLTFE	1179.64	6.81669	PTx	30	2.61113	0.067833	5.02532
PTx-S4	81	90	FLGPKQLTFE	1179.64	6.80436	PTx-E6290	0	0	0
PTx-S4	81	90	FLGPKQLTFE	1179.64	6.83188	PTx-E6290	10	2.14425	0.038776
PTx-S4	81	90	FLGPKQLTFE	1179.64	6.81361	PTx-E6290	30	2.28038	0.051111	4.42463	0.600686	0.306456
PTx-S4	81	95	FLGPKQLTFEGKPAL	1645.93	6.5106	PTx	0	0	0
PTx-S4	81	95	FLGPKQLTFEGKPAL	1645.93	6.56001	PTx	10	3.54726	0.115907
PTx-S4	81	95	FLGPKQLTFEGKPAL	1645.93	6.52502	PTx	30	3.89128	0.157938	7.43854
PTx-S4	81	95	FLGPKQLTFEGKPAL	1645.93	6.5106	PTx-E6290	0	0	0
PTx-S4	81	95	FLGPKQLTFEGKPAL	1645.93	6.5469	PTx-E6290	10	3.20158	0.081845
PTx-S4	81	95	FLGPKQLTFEGKPAL	1645.93	6.52425	PTx-E6290	30	3.43687	0.137776	6.63845	0.800091	0.473814
PTx-S4	81	96	FLGPKQLTFEGKPALE	1774.97	6.4106	PTx	0	0	0
PTx-S4	81	96	FLGPKQLTFEGKPALE	1774.97	6.45344	PTx	10	3.53227	0.081499
PTx-S4	81	96	FLGPKQLTFEGKPALE	1774.97	6.41817	PTx	30	3.90229	0.102398	7.43456
PTx-S4	81	96	FLGPKQLTFEGKPALE	1774.97	6.4106	PTx-E6290	0	0	0
PTx-S4	81	96	FLGPKQLTFEGKPALE	1774.97	6.44018	PTx-E6290	10	3.19378	0.072294
PTx-S4	81	96	FLGPKQLTFEGKPALE	1774.97	6.41685	PTx-E6290	30	3.45081	0.134393	6.6446	0.789968	0.403179
PTx-S4	82	89	LGPKQLTF	903.53	6.379	PTx	0	0	0
PTx-S4	82	89	LGPKQLTF	903.53	6.42662	PTx	10	2.03724	0.097502
PTx-S4	82	89	LGPKQLTF	903.53	6.39332	PTx	30	2.26286	0.121846	4.3001
PTx-S4	82	89	LGPKQLTF	903.53	6.379	PTx-E6290	0	0	0
PTx-S4	82	89	LGPKQLTF	903.53	6.41654	PTx-E6290	10	1.58935	0.076159
PTx-S4	82	89	LGPKQLTF	903.53	6.39476	PTx-E6290	30	2.02381	0.072341	3.61316	0.686936	0.365538
PTx-S4	82	96	LGPKQLTFEGKPALE	1627.91	5.99535	PTx	0	0	0
PTx-S4	82	96	LGPKQLTFEGKPALE	1627.91	6.04027	PTx	10	3.36947	0.080575
PTx-S4	82	96	LGPKQLTFEGKPALE	1627.91	6.008	PTx	30	3.76839	0.037833	7.13786
PTx-S4	82	96	LGPKQLTFEGKPALE	1627.91	5.99535	PTx-E6290	0	0	0
PTx-S4	82	96	LGPKQLTFEGKPALE	1627.91	6.02945	PTx-E6290	10	2.9965	0.074694
PTx-S4	82	96	LGPKQLTFEGKPALE	1627.91	6.00432	PTx-E6290	30	3.33451	0.13142	6.33101	0.806855	0.39426
PTx-S4	82	97	LGPKQLTFEGKPALEL	1740.99	6.67328	PTx	0	0	0
PTx-S4	82	97	LGPKQLTFEGKPALEL	1740.99	6.72224	PTx	10	3.50148	0.079938
PTx-S4	82	97	LGPKQLTFEGKPALEL	1740.99	6.69007	PTx	30	3.92253	0.094994	7.42401
PTx-S4	82	97	LGPKQLTFEGKPALEL	1740.99	6.67328	PTx-E6290	0	0	0
PTx-S4	82	97	LGPKQLTFEGKPALEL	1740.99	6.71023	PTx-E6290	10	3.15867	0.056391
PTx-S4	82	97	LGPKQLTFEGKPALEL	1740.99	6.68698	PTx-E6290	30	3.47306	0.092603	6.63173	0.79228	0.284982
PTx-S4	86	96	QLTFEGKPALE	1232.65	6.15158	PTx	0	0	0
PTx-S4	86	96	QLTFEGKPALE	1232.65	6.19904	PTx	10	2.83166	0.058658
PTx-S4	86	96	QLTFEGKPALE	1232.65	6.16508	PTx	30	3.03048	0.054688	5.86214
PTx-S4	86	96	QLTFEGKPALE	1232.65	6.15158	PTx-E6290	0	0	0
PTx-S4	86	96	QLTFEGKPALE	1232.65	6.1853	PTx-E6290	10	2.6351	0.110303
PTx-S4	86	96	QLTFEGKPALE	1232.65	6.16491	PTx-E6290	30	2.86183	0.033231	5.49694	0.365205	0.330909
PTx-S4	88	95	TFEGKPAL	862.467	5.40789	PTx	0	0	0
PTx-S4	88	95	TFEGKPAL	862.467	5.45032	PTx	10	1.65276	0.04169
PTx-S4	88	95	TFEGKPAL	862.467	5.41544	PTx	30	1.81905	0.048598	3.47181
PTx-S4	88	95	TFEGKPAL	862.467	5.40789	PTx-E6290	0	0	0
PTx-S4	88	95	TFEGKPAL	862.467	5.43379	PTx-E6290	10	1.465	0.052235
PTx-S4	88	95	TFEGKPAL	862.467	5.41031	PTx-E6290	30	1.53543	0.079152	3.00044	0.47137	0.237456
PTx-S4	88	96	TFEGKPALE	991.51	5.27062	PTx	0	0	0
PTx-S4	88	96	TFEGKPALE	991.51	5.31188	PTx	10	1.78791	0.025224
PTx-S4	88	96	TFEGKPALE	991.51	5.28016	PTx	30	1.93399	0.028364	3.7219
PTx-S4	88	96	TFEGKPALE	991.51	5.27062	PTx-E6290	0	0	0
PTx-S4	88	96	TFEGKPALE	991.51	5.30793	PTx-E6290	10	1.60826	0.031645
PTx-S4	88	96	TFEGKPALE	991.51	5.27927	PTx-E6290	30	1.72404	0.040845	3.3323	0.389593	0.122535
PTx-S4	88	97	TFEGKPALEL	1104.59	6.43081	PTx	0	0	0
PTx-S4	88	97	TFEGKPALEL	1104.59	6.47915	PTx	10	1.60956	0.018751
PTx-S4	88	97	TFEGKPALEL	1104.59	6.44395	PTx	30	1.76304	0.016128	3.3726
PTx-S4	88	97	TFEGKPALEL	1104.59	6.43081	PTx-E6290	0	0	0
PTx-S4	88	97	TFEGKPALEL	1104.59	6.46639	PTx-E6290	10	1.47503	0.017569
PTx-S4	88	97	TFEGKPALEL	1104.59	6.44334	PTx-E6290	30	1.62045	0.023862	3.09548	0.277121	0.071586
PTx-S4	91	97	GKPALEL	727.435	5.85114	PTx	0	0	0
PTx-S4	91	97	GKPALEL	727.435	5.90058	PTx	10	0.463125	0.118069
PTx-S4	91	97	GKPALEL	727.435	5.8665	PTx	30	0.540326	0.109367	1.00345
PTx-S4	91	97	GKPALEL	727.435	5.85114	PTx-E6290	0	0	0
PTx-S4	91	97	GKPALEL	727.435	5.88778	PTx-E6290	10	0.358921	0.118915
PTx-S4	91	97	GKPALEL	727.435	5.86431	PTx-E6290	30	0.406102	0.127926	0.765023	0.238428	0.383778
PTx-S4	98	110	IRMVECSGKQDCP	1465.66	5.18382	PTx	0	0	0
PTx-S4	98	110	IRMVECSGKQDCP	1465.66	5.22719	PTx	10	1.89654	0.14236
PTx-S4	98	110	IRMVECSGKQDCP	1465.66	5.20536	PTx	30	1.80861	0.101879	3.70515
PTx-S4	98	110	IRMVECSGKQDCP	1465.66	5.18382	PTx-E6290	0	0	0
PTx-S4	98	110	IRMVECSGKQDCP	1465.66	5.235	PTx-E6290	10	1.73213	0.103089
PTx-S4	98	110	IRMVECSGKQDCP	1465.66	5.20537	PTx-E6290	30	1.57462	0.185685	3.30675	0.398402	0.557055
PTx-S4	101	110	VECSGKQDCP	1065.43	4.48513	PTx	0	0	0
PTx-S4	101	110	VECSGKQDCP	1065.43	4.52343	PTx	10	1.88599	0.092828
PTx-S4	101	110	VECSGKQDCP	1065.43	4.47554	PTx	30	1.91922	0.092928	3.80521
PTx-S4	101	110	VECSGKQDCP	1065.43	4.48513	PTx-E6290	0	0	0
PTx-S4	101	110	VECSGKQDCP	1065.43	4.48961	PTx-E6290	10	1.85371	0.093983
PTx-S4	101	110	VECSGKQDCP	1065.43	4.47497	PTx-E6290	30	1.80763	0.093964	3.66134	0.143869	0.281949
PTx-S4	102	110	ECSGKQDCP	966.365	4.48444	PTx	0	0	0
PTx-S4	102	110	ECSGKQDCP	966.365	4.51853	PTx	10	1.85813	0.032595
PTx-S4	102	110	ECSGKQDCP	966.365	4.47571	PTx	30	1.86943	0.037873	3.72756
PTx-S4	102	110	ECSGKQDCP	966.365	4.48444	PTx-E6290	0	0	0
PTx-S4	102	110	ECSGKQDCP	966.365	4.48963	PTx-E6290	10	1.80271	0.084768
PTx-S4	102	110	ECSGKQDCP	966.365	4.47549	PTx-E6290	30	1.71423	0.10177	3.51694	0.21062	0.30531
PTx-S4	103	110	CSGKQDCP	837.323	4.48574	PTx	0	0	0
PTx-S4	103	110	CSGKQDCP	837.323	4.5194	PTx	10	1.26017	0.032744
PTx-S4	103	110	CSGKQDCP	837.323	4.4757	PTx	30	1.29309	0.070927	2.55325
PTx-S4	103	110	CSGKQDCP	837.323	4.48574	PTx-E6290	0	0	0
PTx-S4	103	110	CSGKQDCP	837.323	4.48955	PTx-E6290	10	1.29442	0.077343
PTx-S4	103	110	CSGKQDCP	837.323	4.47478	PTx-E6290	30	1.20139	0.058953	2.49581	0.057442	0.232029
PTx-S4	104	110	SGKQDCP	734.314	4.17918	PTx	0	0	0
PTx-S4	104	110	SGKQDCP	734.314	4.22955	PTx	10	1.04827	0.050787
PTx-S4	104	110	SGKQDCP	734.314	4.19978	PTx	30	1.00534	0.051635	2.0536
PTx-S4	104	110	SGKQDCP	734.314	4.17918	PTx-E6290	0	0	0
PTx-S4	104	110	SGKQDCP	734.314	4.21469	PTx-E6290	10	1.00071	0.092379
PTx-S4	104	110	SGKQDCP	734.314	4.20201	PTx-E6290	30	0.92856	0.037991	1.92927	0.124328	0.277137
PTx-S5	1	18	IYSPADVAGLPTHLYKNF	2006.04	7.15761	PTx	0	0	0
PTx-S5	1	18	IYSPADVAGLPTHLYKNF	2006.04	7.18367	PTx	10	5.05619	0.055998
PTx-S5	1	18	IYSPADVAGLPTHLYKNF	2006.04	7.14911	PTx	30	5.45901	0.059214	10.5152
PTx-S5	1	18	IYSPADVAGLPTHLYKNF	2006.04	7.15761	PTx-E6290	0	0	0
PTx-S5	1	18	IYSPADVAGLPTHLYKNF	2006.04	7.16924	PTx-E6290	10	5.11413	0.050933
PTx-S5	1	18	IYSPADVAGLPTHLYKNF	2006.04	7.14919	PTx-E6290	30	4.81282	0.130584	9.92694	0.588246	0.391752
PTx-S5	1	23	IYSPADVAGLPTHLYKNFTVQEL	2576.34	7.60658	PTx	0	0	0
PTx-S5	1	23	IYSPADVAGLPTHLYKNFTVQEL	2576.34	7.6285	PTx	10	5.83335	0.041947
PTx-S5	1	23	IYSPADVAGLPTHLYKNFTVQEL	2576.34	7.59245	PTx	30	6.54001	0.199566	12.3734
PTx-S5	1	23	IYSPADVAGLPTHLYKNFTVQEL	2576.34	7.60658	PTx-E6290	0	0	0
PTx-S5	1	23	IYSPADVAGLPTHLYKNFTVQEL	2576.34	7.61512	PTx-E6290	10	5.81488	0.143733
PTx-S5	1	23	IYSPADVAGLPTHLYKNFTVQEL	2576.34	7.59347	PTx-E6290	30	6.03122	0.032454	11.8461	0.527262	0.598698
PTx-S5	2	14	YSPADVAGLPTHL	1340.68	6.31459	PTx	0	0	0
PTx-S5	2	14	YSPADVAGLPTHL	1340.68	6.33792	PTx	10	1.25905	0.199201
PTx-S5	2	14	YSPADVAGLPTHL	1340.68	6.33481	PTx	30	1.14125	0.082216	2.4003
PTx-S5	2	14	YSPADVAGLPTHL	1340.68	6.31459	PTx-E6290	0	0	0
PTx-S5	2	14	YSPADVAGLPTHL	1340.68	6.35542	PTx-E6290	10	1.1926	0.065778
PTx-S5	2	14	YSPADVAGLPTHL	1340.68	6.33491	PTx-E6290	30	1.14074	0.061857	2.33334	0.066963	0.597603
PTx-S5	4	12	PADVAGLPT	840.446	5.89535	PTx	0	0	0
PTx-S5	4	12	PADVAGLPT	840.446	5.93951	PTx	10	0.953646	0.032862
PTx-S5	4	12	PADVAGLPT	840.446	5.90665	PTx	30	1.11305	0.023477	2.06669
PTx-S5	4	12	PADVAGLPT	840.446	5.89535	PTx-E6290	0	0	0
PTx-S5	4	12	PADVAGLPT	840.446	5.92713	PTx-E6290	10	0.812856	0.018845
PTx-S5	4	12	PADVAGLPT	840.446	5.90501	PTx-E6290	30	0.917841	0.0278	1.7307	0.335995	0.098586
PTx-S5	7	14	VAGLPTHL	807.472	6.16635	PTx	0	0	0
PTx-S5	7	14	VAGLPTHL	807.472	6.21308	PTx	10	2.02012	0.081242
PTx-S5	7	14	VAGLPTHL	807.472	6.17964	PTx	30	2.17835	0.051249	4.19847
PTx-S5	7	14	VAGLPTHL	807.472	6.16635	PTx-E6290	0	0	0
PTx-S5	7	14	VAGLPTHL	807.472	6.19954	PTx-E6290	10	1.98862	0.088143
PTx-S5	7	14	VAGLPTHL	807.472	6.17812	PTx-E6290	30	1.86698	0.123816	3.85561	0.342863	0.371448
PTx-S5	9	15	GLPTHLY	800.43	7.4572	PTx	0	0	0
PTx-S5	9	15	GLPTHLY	800.43	7.49664	PTx	10	0.322549	0.055175
PTx-S5	9	15	GLPTHLY	800.43	7.46348	PTx	30	0.197729	0.056371	0.520278
PTx-S5	9	15	GLPTHLY	800.43	7.4572	PTx-E6290	0	0	0
PTx-S5	9	15	GLPTHLY	800.43	7.48515	PTx-E6290	10	0.409297	0.05484
PTx-S5	9	15	GLPTHLY	800.43	7.45941	PTx-E6290	30	0.240193	0.045975	0.64949	-0.129212	0.169113
PTx-S5	15	22	YKNFTVQE	1028.5	5.54446	PTx	0	0	0
PTx-S5	15	22	YKNFTVQE	1028.5	5.58841	PTx	10	0.788492	0.170659
PTx-S5	15	22	YKNFTVQE	1028.5	5.55512	PTx	30	1.09956	0.1417	1.88806
PTx-S5	15	22	YKNFTVQE	1028.5	5.54446	PTx-E6290	0	0	0
PTx-S5	15	22	YKNFTVQE	1028.5	5.57704	PTx-E6290	10	0.653597	0.145925
PTx-S5	15	22	YKNFTVQE	1028.5	5.55441	PTx-E6290	30	0.785701	0.165379	1.4393	0.448758	0.511977
PTx-S5	51	57	SDAGHEH	752.296	6.26223	PTx	0	0	0
PTx-S5	51	57	SDAGHEH	752.296	6.30282	PTx	10	0.142933	0.031926
PTx-S5	51	57	SDAGHEH	752.296	6.26931	PTx	30	0.121975	0.036307	0.264908
PTx-S5	51	57	SDAGHEH	752.296	6.26223	PTx-E6290	0	0	0
PTx-S5	51	57	SDAGHEH	752.296	6.29216	PTx-E6290	10	0.136057	0.048652
PTx-S5	51	57	SDAGHEH	752.296	6.26698	PTx-E6290	30	0.085843	0.036305	0.2219	0.043008	0.145956
PTx-S5	51	58	SDAGHEHD	867.323	6.27827	PTx	0	0	0
PTx-S5	51	58	SDAGHEHD	867.323	6.32111	PTx	10	0.207127	0.046563
PTx-S5	51	58	SDAGHEHD	867.323	6.28798	PTx	30	0.177777	0.013134	0.384904
PTx-S5	51	58	SDAGHEHD	867.323	6.27827	PTx-E6290	0	0	0
PTx-S5	51	58	SDAGHEHD	867.323	6.3093	PTx-E6290	10	0.170497	0.044742
PTx-S5	51	58	SDAGHEHD	867.323	6.28712	PTx-E6290	30	0.140114	0.055488	0.310611	0.074293	0.166464
PTx-S5	51	61	SDAGHEHDTWF	1301.52	6.38465	PTx	0	0	0
PTx-S5	51	61	SDAGHEHDTWF	1301.52	6.43429	PTx	10	1.11936	0.080874
PTx-S5	51	61	SDAGHEHDTWF	1301.52	6.40192	PTx	30	1.15171	0.073218	2.27107
PTx-S5	51	61	SDAGHEHDTWF	1301.52	6.38465	PTx-E6290	0	0	0
PTx-S5	51	61	SDAGHEHDTWF	1301.52	6.42512	PTx-E6290	10	1.03876	0.122155
PTx-S5	51	61	SDAGHEHDTWF	1301.52	6.40065	PTx-E6290	30	0.894635	0.146515	1.9334	0.337678	0.439545
PTx-S5	54	61	GHEHDTWF	1028.42	6.21298	PTx	0	0	0
PTx-S5	54	61	GHEHDTWF	1028.42	6.26444	PTx	10	0.81763	0.036128
PTx-S5	54	61	GHEHDTWF	1028.42	6.23283	PTx	30	0.871527	0.049883	1.68916
PTx-S5	54	61	GHEHDTWF	1028.42	6.21298	PTx-E6290	0	0	0
PTx-S5	54	61	GHEHDTWF	1028.42	6.25633	PTx-E6290	10	0.709502	0.045352
PTx-S5	54	61	GHEHDTWF	1028.42	6.23009	PTx-E6290	30	0.554097	0.167286	1.2636	0.425558	0.501858
PTx-S5	64	76	MLGFAISAYALKS	1371.73	6.28927	PTx	0	0	0
PTx-S5	64	76	MLGFAISAYALKS	1371.73	6.34293	PTx	10	2.7457	0.139291
PTx-S5	64	76	MLGFAISAYALKS	1371.73	6.31288	PTx	30	3.04377	0.058249	5.78947
PTx-S5	64	76	MLGFAISAYALKS	1371.73	6.28927	PTx-E6290	0	0	0
PTx-S5	64	76	MLGFAISAYALKS	1371.73	6.33504	PTx-E6290	10	2.85294	0.041617
PTx-S5	64	76	MLGFAISAYALKS	1371.73	6.31067	PTx-E6290	30	2.84847	0.156891	5.70141	0.088065	0.470673
PTx-S5	66	83	GFAISAYALKSRIALTVE	1910.07	7.00705	PTx	0	0	0
PTx-S5	66	83	GFAISAYALKSRIALTVE	1910.07	7.04964	PTx	10	3.76811	0.103342
PTx-S5	66	83	GFAISAYALKSRIALTVE	1910.07	7.02065	PTx	30	4.21807	0.194717	7.98618
PTx-S5	66	83	GFAISAYALKSRIALTVE	1910.07	7.00705	PTx-E6290	0	0	0
PTx-S5	66	83	GFAISAYALKSRIALTVE	1910.07	7.03747	PTx-E6290	10	3.33508	0.182678
PTx-S5	66	83	GFAISAYALKSRIALTVE	1910.07	7.02173	PTx-E6290	30	4.01051	0.069684	7.3456	0.640581	0.584151
PTx-S5	70	77	SAYALKSR	895.5	7.48395	PTx	0	0	0
PTx-S5	70	77	SAYALKSR	895.5	7.52514	PTx	10	0.14132	0.018666
PTx-S5	70	77	SAYALKSR	895.5	7.48616	PTx	30	0.076498	0.047818	0.217818
PTx-S5	70	77	SAYALKSR	895.5	7.48395	PTx-E6290	0	0	0
PTx-S5	70	77	SAYALKSR	895.5	7.50535	PTx-E6290	10	0.072914	0.039676
PTx-S5	70	77	SAYALKSR	895.5	7.48481	PTx-E6290	30	0.055516	0.090335	0.12843	0.089388	0.271005
PTx-S5	71	78	AYALKSRI	921.552	4.73042	PTx	0	0	0
PTx-S5	71	78	AYALKSRI	921.552	4.76058	PTx	10	0.232502	0.077103
PTx-S5	71	78	AYALKSRI	921.552	4.70304	PTx	30	0.165306	0.019765	0.397808
PTx-S5	71	78	AYALKSRI	921.552	4.73042	PTx-E6290	0	0	0
PTx-S5	71	78	AYALKSRI	921.552	4.71434	PTx-E6290	10	0.109373	0.047394
PTx-S5	71	78	AYALKSRI	921.552	4.70391	PTx-E6290	30	0.069205	0.086935	0.178578	0.21923	0.260805
PTx-S5	72	80	YALKSRIAL	1034.64	5.66101	PTx	0	0	0
PTx-S5	72	80	YALKSRIAL	1034.64	5.70928	PTx	10	0.292712	0.154847
PTx-S5	72	80	YALKSRIAL	1034.64	5.67473	PTx	30	0.219521	0.139561	0.512233
PTx-S5	72	80	YALKSRIAL	1034.64	5.66101	PTx-E6290	0	0	0
PTx-S5	72	80	YALKSRIAL	1034.64	5.69485	PTx-E6290	10	0.158119	0.153288
PTx-S5	72	80	YALKSRIAL	1034.64	5.67517	PTx-E6290	30	0.120074	0.146321	0.278193	0.23404	0.464541
PTx-S5	74	80	LKSRIAL	800.535	4.92119	PTx	0	0	0
PTx-S5	74	80	LKSRIAL	800.535	4.97408	PTx	10	0.230564	0.057398
PTx-S5	74	80	LKSRIAL	800.535	4.9428	PTx	30	0.236063	0.058038	0.466627
PTx-S5	74	80	LKSRIAL	800.535	4.92119	PTx-E6290	0	0	0
PTx-S5	74	80	LKSRIAL	800.535	4.95392	PTx-E6290	10	0.06172	0.0821
PTx-S5	74	80	LKSRIAL	800.535	4.94538	PTx-E6290	30	0.121028	0.093455	0.182748	0.283879	0.280365
PTx-S5	76	84	SRIALTVED	1003.54	7.00682	PTx	0	0	0
PTx-S5	76	84	SRIALTVED	1003.54	7.04956	PTx	10	1.7265	0.055725
PTx-S5	76	84	SRIALTVED	1003.54	7.01877	PTx	30	1.80807	0.102216	3.53457
PTx-S5	76	84	SRIALTVED	1003.54	7.00682	PTx-E6290	0	0	0
PTx-S5	76	84	SRIALTVED	1003.54	7.03845	PTx-E6290	10	1.40227	0.178447
PTx-S5	76	84	SRIALTVED	1003.54	7.02187	PTx-E6290	30	1.42611	0.022582	2.82839	0.706181	0.535341
PTx-S5	80	94	LTVEDSPYPGTPGDL	1560.74	7.14459	PTx	0	0	0
PTx-S5	80	94	LTVEDSPYPGTPGDL	1560.74	7.18198	PTx	10	2.57106	0.047199
PTx-S5	80	94	LTVEDSPYPGTPGDL	1560.74	7.14814	PTx	30	2.73403	0.066769	5.30509
PTx-S5	80	94	LTVEDSPYPGTPGDL	1560.74	7.14459	PTx-E6290	0	0	0
PTx-S5	80	94	LTVEDSPYPGTPGDL	1560.74	7.16738	PTx-E6290	10	2.53678	0.020386
PTx-S5	80	94	LTVEDSPYPGTPGDL	1560.74	7.14572	PTx-E6290	30	2.4481	0.209063	4.98489	0.320203	0.627189
PTx-S5	80	96	LTVEDSPYPGTPGDLLE	1802.87	7.65514	PTx	0	0	0
PTx-S5	80	96	LTVEDSPYPGTPGDLLE	1802.87	7.69129	PTx	10	2.12223	0.043062
PTx-S5	80	96	LTVEDSPYPGTPGDLLE	1802.87	7.65489	PTx	30	2.22753	0.034278	4.34976
PTx-S5	80	96	LTVEDSPYPGTPGDLLE	1802.87	7.65514	PTx-E6290	0	0	0
PTx-S5	80	96	LTVEDSPYPGTPGDLLE	1802.87	7.68002	PTx-E6290	10	2.06918	0.031438
PTx-S5	80	96	LTVEDSPYPGTPGDLLE	1802.87	7.65344	PTx-E6290	30	2.01348	0.031407	4.08266	0.267097	0.129186
PTx-S5	81	94	TVEDSPYPGTPGDL	1447.66	6.85097	PTx	0	0	0
PTx-S5	81	94	TVEDSPYPGTPGDL	1447.66	6.8897	PTx	10	2.10175	0.041593
PTx-S5	81	94	TVEDSPYPGTPGDL	1447.66	6.85906	PTx	30	2.1896	0.04028	4.29134
PTx-S5	81	94	TVEDSPYPGTPGDL	1447.66	6.85097	PTx-E6290	0	0	0
PTx-S5	81	94	TVEDSPYPGTPGDL	1447.66	6.87421	PTx-E6290	10	2.05378	0.054972
PTx-S5	81	94	TVEDSPYPGTPGDL	1447.66	6.85907	PTx-E6290	30	2.0318	0.081162	4.08558	0.205761	0.243486
PTx-S5	81	96	TVEDSPYPGTPGDLLE	1689.79	7.46659	PTx	0	0	0
PTx-S5	81	96	TVEDSPYPGTPGDLLE	1689.79	7.50204	PTx	10	2.10125	0.153569
PTx-S5	81	96	TVEDSPYPGTPGDLLE	1689.79	7.47062	PTx	30	2.39697	0.153051	4.49822
PTx-S5	81	96	TVEDSPYPGTPGDLLE	1689.79	7.46659	PTx-E6290	0	0	0
PTx-S5	81	96	TVEDSPYPGTPGDLLE	1689.79	7.4907	PTx-E6290	10	2.13226	0.055953
PTx-S5	81	96	TVEDSPYPGTPGDLLE	1689.79	7.4687	PTx-E6290	30	1.97964	0.043168	4.11189	0.386322	0.460707
PTx-S5	84	94	DSPYPGTPGDL	1118.5	6.89899	PTx	0	0	0
PTx-S5	84	94	DSPYPGTPGDL	1118.5	6.93513	PTx	10	1.77769	0.067543
PTx-S5	84	94	DSPYPGTPGDL	1118.5	6.9028	PTx	30	1.88969	0.069455	3.66738
PTx-S5	84	94	DSPYPGTPGDL	1118.5	6.89899	PTx-E6290	0	0	0
PTx-S5	84	94	DSPYPGTPGDL	1118.5	6.91877	PTx-E6290	10	1.75386	0.075418
PTx-S5	84	94	DSPYPGTPGDL	1118.5	6.90314	PTx-E6290	30	1.66575	0.127358	3.41962	0.247766	0.382074
PTx-S5	84	96	DSPYPGTPGDLLE	1360.63	7.58551	PTx	0	0	0
PTx-S5	84	96	DSPYPGTPGDLLE	1360.63	7.6215	PTx	10	1.59524	0.056993
PTx-S5	84	96	DSPYPGTPGDLLE	1360.63	7.5852	PTx	30	1.78056	0.05587	3.3758
PTx-S5	84	96	DSPYPGTPGDLLE	1360.63	7.58551	PTx-E6290	0	0	0
PTx-S5	84	96	DSPYPGTPGDLLE	1360.63	7.60492	PTx-E6290	10	1.56706	0.108003
PTx-S5	84	96	DSPYPGTPGDLLE	1360.63	7.58274	PTx-E6290	30	1.48462	0.168975	3.05167	0.324127	0.506925
PTx-S5	88	94	PGTPGDL	656.325	6.89627	PTx	0	0	0
PTx-S5	88	94	PGTPGDL	656.325	6.93182	PTx	10	1.07625	0.061376
PTx-S5	88	94	PGTPGDL	656.325	6.89951	PTx	30	1.23271	0.018145	2.30896
PTx-S5	88	94	PGTPGDL	656.325	6.89627	PTx-E6290	0	0	0
PTx-S5	88	94	PGTPGDL	656.325	6.9161	PTx-E6290	10	0.91814	0.094619
PTx-S5	88	94	PGTPGDL	656.325	6.90718	PTx-E6290	30	0.888511	0.005501	1.80665	0.502312	0.283857
PTx-S5	97	103	LQICPLN	800.433	6.95613	PTx	0	0	0
PTx-S5	97	103	LQICPLN	800.433	6.99699	PTx	10	0.683273	0.074674
PTx-S5	97	103	LQICPLN	800.433	6.96495	PTx	30	0.492819	0.127332	1.17609
PTx-S5	97	103	LQICPLN	800.433	6.95613	PTx-E6290	0	0	0
PTx-S5	97	103	LQICPLN	800.433	6.97644	PTx-E6290	10	0.543558	0.153375
PTx-S5	97	103	LQICPLN	800.433	6.96327	PTx-E6290	30	0.483068	0.140385	1.02663	0.149466	0.460125
PTx-S5	97	104	LQICPLNG	857.455	6.95722	PTx	0	0	0
PTx-S5	97	104	LQICPLNG	857.455	6.99763	PTx	10	0.746683	0.022502
PTx-S5	97	104	LQICPLNG	857.455	6.96621	PTx	30	0.638642	0.027144	1.38532
PTx-S5	97	104	LQICPLNG	857.455	6.95722	PTx-E6290	0	0	0
PTx-S5	97	104	LQICPLNG	857.455	6.98207	PTx-E6290	10	0.705669	0.05453
PTx-S5	97	104	LQICPLNG	857.455	6.96652	PTx-E6290	30	0.570878	0.043903	1.27655	0.108778	0.16359
PTx-S5	98	104	QICPLNG	744.371	6.149	PTx	0	0	0
PTx-S5	98	104	QICPLNG	744.371	6.19752	PTx	10	0.57489	0.186326
PTx-S5	98	104	QICPLNG	744.371	6.16333	PTx	30	0.495526	0.190841	1.07042
PTx-S5	98	104	QICPLNG	744.371	6.149	PTx-E6290	0	0	0
PTx-S5	98	104	QICPLNG	744.371	6.18354	PTx-E6290	10	0.538511	0.18765
PTx-S5	98	104	QICPLNG	744.371	6.16157	PTx-E6290	30	0.4502	0.186616	0.988711	0.081705	0.572523
PTx-S5	98	107	QICPLNGYCE	1139.49	7.21278	PTx	0	0	0
PTx-S5	98	107	QICPLNGYCE	1139.49	7.25179	PTx	10	1.50964	0.037871
PTx-S5	98	107	QICPLNGYCE	1139.49	7.21858	PTx	30	1.54124	0.032124	3.05089
PTx-S5	98	107	QICPLNGYCE	1139.49	7.21278	PTx-E6290	0	0	0
PTx-S5	98	107	QICPLNGYCE	1139.49	7.2375	PTx-E6290	10	1.49769	0.022773
PTx-S5	98	107	QICPLNGYCE	1139.49	7.21608	PTx-E6290	30	1.38917	0.054396	2.88686	0.164024	0.163188

## Sheet: PTx-PS21c Difference
Pertussis Toxin bound to mAb PS21c - Epitope Screening - 03Apr2023
Protein	Start	End	Sequence	MHP	RT	State	Exposure	Uptake	Uptake SD	Summed Uptake	Difference in Summed Uptake	3*maxSD		Total Sequence Coverage:	79.42
PTxS1	1	8	DDPPATVY	877.394	6.27541	PTx	0	0	0					S1 Sequence Coverage:	83	S1 Sequence Redundancy	4.02
PTxS1	1	8	DDPPATVY	877.394	6.28008	PTx	10	0.970507	0.032444					S2 Sequence Coverage:	82.4	S2 Sequence Redundancy	2.46
PTxS1	1	8	DDPPATVY	877.394	6.26192	PTx	30	0.952775	0.059241	1.92328				S3 Sequence Coverage:	75.4	S3 Sequence Redundancy	3.96
PTxS1	1	8	DDPPATVY	877.394	6.27541	PTx-PS21C	0	0	0					S4 Sequence Coverage:	91.8	S4 Sequence Redundancy	7.5
PTxS1	1	8	DDPPATVY	877.394	6.23096	PTx-PS21C	10	0.875499	0.042042					S5 Sequence Coverage:	64.5	S5 Sequence Redundancy	2.72
PTxS1	1	8	DDPPATVY	877.394	6.25309	PTx-PS21C	30	0.872736	0.127659	1.74823	0.175047	0.382977
PTxS1	1	9	DDPPATVYR	1033.49	4.9556	PTx	0	0	0
PTxS1	1	9	DDPPATVYR	1033.49	4.94474	PTx	10	1.14147	0.035338
PTxS1	1	9	DDPPATVYR	1033.49	4.931	PTx	30	1.10379	0.036406	2.24526
PTxS1	1	9	DDPPATVYR	1033.49	4.9556	PTx-PS21C	0	0	0
PTxS1	1	9	DDPPATVYR	1033.49	4.8946	PTx-PS21C	10	1.14204	0.056975
PTxS1	1	9	DDPPATVYR	1033.49	4.92448	PTx-PS21C	30	1.0751	0.035721	2.21714	0.028118	0.170925
PTxS1	1	10	DDPPATVYRY	1196.56	5.90684	PTx	0	0	0
PTxS1	1	10	DDPPATVYRY	1196.56	5.91505	PTx	10	1.14054	0.072971
PTxS1	1	10	DDPPATVYRY	1196.56	5.89408	PTx	30	1.18303	0.082818	2.32357
PTxS1	1	10	DDPPATVYRY	1196.56	5.90684	PTx-PS21C	0	0	0
PTxS1	1	10	DDPPATVYRY	1196.56	5.86512	PTx-PS21C	10	1.08389	0.072621
PTxS1	1	10	DDPPATVYRY	1196.56	5.88894	PTx-PS21C	30	1.079	0.112941	2.16289	0.160682	0.338823
PTxS1	1	17	DDPPATVYRYDSRPPED	1992.89	5.56855	PTx	0	0	0
PTxS1	1	17	DDPPATVYRYDSRPPED	1992.89	5.5758	PTx	10	1.77952	0.074053
PTxS1	1	17	DDPPATVYRYDSRPPED	1992.89	5.55591	PTx	30	1.83152	0.081745	3.61104
PTxS1	1	17	DDPPATVYRYDSRPPED	1992.89	5.56855	PTx-PS21C	0	0	0
PTxS1	1	17	DDPPATVYRYDSRPPED	1992.89	5.52771	PTx-PS21C	10	1.64783	0.12454
PTxS1	1	17	DDPPATVYRYDSRPPED	1992.89	5.55158	PTx-PS21C	30	1.74605	0.082614	3.39388	0.217161	0.37362
PTxS1	3	9	PPATVYR	803.441	4.94522	PTx	0	0	0
PTxS1	3	9	PPATVYR	803.441	4.94937	PTx	10	0.691519	0.055482
PTxS1	3	9	PPATVYR	803.441	4.93565	PTx	30	0.714471	0.0608	1.40599
PTxS1	3	9	PPATVYR	803.441	4.94522	PTx-PS21C	0	0	0
PTxS1	3	9	PPATVYR	803.441	4.89794	PTx-PS21C	10	0.651433	0.056749
PTxS1	3	9	PPATVYR	803.441	4.92448	PTx-PS21C	30	0.629669	0.111434	1.2811	0.124888	0.334302
PTxS1	3	17	PPATVYRYDSRPPED	1762.84	5.57486	PTx	0	0	0
PTxS1	3	17	PPATVYRYDSRPPED	1762.84	5.58477	PTx	10	0.818489	0.14945
PTxS1	3	17	PPATVYRYDSRPPED	1762.84	5.56762	PTx	30	0.488727	0.127523	1.30722
PTxS1	3	17	PPATVYRYDSRPPED	1762.84	5.57486	PTx-PS21C	0	0	0
PTxS1	3	17	PPATVYRYDSRPPED	1762.84	5.53419	PTx-PS21C	10	0.493631	0.049633
PTxS1	3	17	PPATVYRYDSRPPED	1762.84	5.55468	PTx-PS21C	30	0.592534	0.215755	1.08617	0.221051	0.647265
PTxS1	10	16	YDSRPPE	863.389	4.38523	PTx	0	0	0
PTxS1	10	16	YDSRPPE	863.389	4.39396	PTx	10	0.43914	0.105842
PTxS1	10	16	YDSRPPE	863.389	4.37199	PTx	30	0.446012	0.099715	0.885152
PTxS1	10	16	YDSRPPE	863.389	4.38523	PTx-PS21C	0	0	0
PTxS1	10	16	YDSRPPE	863.389	4.34954	PTx-PS21C	10	0.36226	0.10296
PTxS1	10	16	YDSRPPE	863.389	4.37024	PTx-PS21C	30	0.369487	0.081439	0.731747	0.153405	0.317526
PTxS1	10	17	YDSRPPED	978.416	4.49455	PTx	0	0	0
PTxS1	10	17	YDSRPPED	978.416	4.50344	PTx	10	0.615337	0.130824
PTxS1	10	17	YDSRPPED	978.416	4.48297	PTx	30	0.633885	0.129281	1.24922
PTxS1	10	17	YDSRPPED	978.416	4.49455	PTx-PS21C	0	0	0
PTxS1	10	17	YDSRPPED	978.416	4.45909	PTx-PS21C	10	0.496108	0.117593
PTxS1	10	17	YDSRPPED	978.416	4.47917	PTx-PS21C	30	0.559761	0.125062	1.05587	0.193353	0.392472
PTxS1	18	33	VFQNGFTAWGNNDNVL	1795.84	8.09367	PTx	0	0	0
PTxS1	18	33	VFQNGFTAWGNNDNVL	1795.84	8.09501	PTx	10	2.57585	0.137352
PTxS1	18	33	VFQNGFTAWGNNDNVL	1795.84	8.07044	PTx	30	3.15839	0.404322	5.73423
PTxS1	18	33	VFQNGFTAWGNNDNVL	1795.84	8.09367	PTx-PS21C	0	0	0
PTxS1	18	33	VFQNGFTAWGNNDNVL	1795.84	8.04572	PTx-PS21C	10	1.45848	0.165717
PTxS1	18	33	VFQNGFTAWGNNDNVL	1795.84	8.06852	PTx-PS21C	30	1.7127	0.1471	3.17118	2.56305	1.21297
PTxS1	21	30	NGFTAWGNND	1095.45	7.08194	PTx	0	0	0
PTxS1	21	30	NGFTAWGNND	1095.45	7.09248	PTx	10	1.49549	0.114121
PTxS1	21	30	NGFTAWGNND	1095.45	7.07117	PTx	30	1.67228	0.158158	3.16777
PTxS1	21	30	NGFTAWGNND	1095.45	7.08194	PTx-PS21C	0	0	0
PTxS1	21	30	NGFTAWGNND	1095.45	7.04376	PTx-PS21C	10	0.936757	0.138071
PTxS1	21	30	NGFTAWGNND	1095.45	7.06807	PTx-PS21C	30	1.19663	0.134969	2.13339	1.03438	0.474474
PTxS1	43	50	VGSSNSAF	768.352	5.74254	PTx	0	0	0
PTxS1	43	50	VGSSNSAF	768.352	5.75739	PTx	10	0.585789	0.020619
PTxS1	43	50	VGSSNSAF	768.352	5.73336	PTx	30	0.573722	0.012234	1.15951
PTxS1	43	50	VGSSNSAF	768.352	5.74254	PTx-PS21C	0	0	0
PTxS1	43	50	VGSSNSAF	768.352	5.70244	PTx-PS21C	10	0.468956	0.05587
PTxS1	43	50	VGSSNSAF	768.352	5.72678	PTx-PS21C	30	0.420411	0.01976	0.889367	0.270144	0.16761
PTxS1	51	62	VSTSSSRRYTEV	1371.69	4.62315	PTx	0	0	0
PTxS1	51	62	VSTSSSRRYTEV	1371.69	4.61234	PTx	10	1.37017	0.102612
PTxS1	51	62	VSTSSSRRYTEV	1371.69	4.58162	PTx	30	1.51861	0.097336	2.88878
PTxS1	51	62	VSTSSSRRYTEV	1371.69	4.62315	PTx-PS21C	0	0	0
PTxS1	51	62	VSTSSSRRYTEV	1371.69	4.59021	PTx-PS21C	10	1.21631	0.127076
PTxS1	51	62	VSTSSSRRYTEV	1371.69	4.59645	PTx-PS21C	30	1.41313	0.122385	2.62944	0.259341	0.381228
PTxS1	51	70	VSTSSSRRYTEVYLEHRMQE	2458.18	5.47839	PTx	0	0	0
PTxS1	51	70	VSTSSSRRYTEVYLEHRMQE	2458.18	5.49119	PTx	10	1.45845	0.202476
PTxS1	51	70	VSTSSSRRYTEVYLEHRMQE	2458.18	5.46482	PTx	30	1.66502	0.186026	3.12347
PTxS1	51	70	VSTSSSRRYTEVYLEHRMQE	2458.18	5.47839	PTx-PS21C	0	0	0
PTxS1	51	70	VSTSSSRRYTEVYLEHRMQE	2458.18	5.43725	PTx-PS21C	10	1.36465	0.152599
PTxS1	51	70	VSTSSSRRYTEVYLEHRMQE	2458.18	5.46503	PTx-PS21C	30	1.57898	0.147372	2.94363	0.179842	0.607428
PTxS1	60	70	TEVYLEHRMQE	1434.67	5.32691	PTx	0	0	0
PTxS1	60	70	TEVYLEHRMQE	1434.67	5.34285	PTx	10	0.253875	0.04965
PTxS1	60	70	TEVYLEHRMQE	1434.67	5.31827	PTx	30	0.212119	0.056528	0.465994
PTxS1	60	70	TEVYLEHRMQE	1434.67	5.32691	PTx-PS21C	0	0	0
PTxS1	60	70	TEVYLEHRMQE	1434.67	5.28938	PTx-PS21C	10	0.079383	0.044131
PTxS1	60	70	TEVYLEHRMQE	1434.67	5.31333	PTx-PS21C	30	0.139388	0.059985	0.218771	0.247223	0.179955
PTxS1	63	70	YLEHRMQE	1105.51	4.47992	PTx	0	0	0
PTxS1	63	70	YLEHRMQE	1105.51	4.47865	PTx	10	0.206768	0.197445
PTxS1	63	70	YLEHRMQE	1105.51	4.45387	PTx	30	0.145299	0.198988	0.352067
PTxS1	63	70	YLEHRMQE	1105.51	4.47992	PTx-PS21C	0	0	0
PTxS1	63	70	YLEHRMQE	1105.51	4.45449	PTx-PS21C	10	0.141573	0.200306
PTxS1	63	70	YLEHRMQE	1105.51	4.45663	PTx-PS21C	30	0.09766	0.186814	0.239233	0.112834	0.600918
PTxS1	63	73	YLEHRMQEAVE	1404.66	5.16088	PTx	0	0	0
PTxS1	63	73	YLEHRMQEAVE	1404.66	5.17754	PTx	10	0.302514	0.137525
PTxS1	63	73	YLEHRMQEAVE	1404.66	5.15962	PTx	30	0.298188	0.140425	0.600702
PTxS1	63	73	YLEHRMQEAVE	1404.66	5.16088	PTx-PS21C	0	0	0
PTxS1	63	73	YLEHRMQEAVE	1404.66	5.12129	PTx-PS21C	10	0.208123	0.139282
PTxS1	63	73	YLEHRMQEAVE	1404.66	5.15741	PTx-PS21C	30	0.260366	0.138237	0.468489	0.132213	0.421275
PTxS1	64	73	LEHRMQEAVE	1241.59	4.53662	PTx	0	0	0
PTxS1	64	73	LEHRMQEAVE	1241.59	4.53262	PTx	10	0.326112	0.068457
PTxS1	64	73	LEHRMQEAVE	1241.59	4.50759	PTx	30	0.320561	0.056233	0.646673
PTxS1	64	73	LEHRMQEAVE	1241.59	4.53662	PTx-PS21C	0	0	0
PTxS1	64	73	LEHRMQEAVE	1241.59	4.50441	PTx-PS21C	10	0.265971	0.073091
PTxS1	64	73	LEHRMQEAVE	1241.59	4.51032	PTx-PS21C	30	0.270051	0.066822	0.536022	0.110651	0.219273
PTxS1	74	87	AERAGRGTGHFIGY	1491.75	4.94255	PTx	0	0	0
PTxS1	74	87	AERAGRGTGHFIGY	1491.75	4.97931	PTx	10	2.26723	0.151072
PTxS1	74	87	AERAGRGTGHFIGY	1491.75	4.94869	PTx	30	2.60246	0.220041	4.86969
PTxS1	74	87	AERAGRGTGHFIGY	1491.75	4.94255	PTx-PS21C	0	0	0
PTxS1	74	87	AERAGRGTGHFIGY	1491.75	4.91147	PTx-PS21C	10	2.02196	0.202528
PTxS1	74	87	AERAGRGTGHFIGY	1491.75	4.95137	PTx-PS21C	30	2.28036	0.223558	4.30232	0.567373	0.670674
PTxS1	74	89	AERAGRGTGHFIGYIY	1767.89	5.89479	PTx	0	0	0
PTxS1	74	89	AERAGRGTGHFIGYIY	1767.89	5.91045	PTx	10	2.01706	0.061499
PTxS1	74	89	AERAGRGTGHFIGYIY	1767.89	5.88522	PTx	30	2.31663	0.069093	4.33369
PTxS1	74	89	AERAGRGTGHFIGYIY	1767.89	5.89479	PTx-PS21C	0	0	0
PTxS1	74	89	AERAGRGTGHFIGYIY	1767.89	5.85383	PTx-PS21C	10	1.74366	0.141359
PTxS1	74	89	AERAGRGTGHFIGYIY	1767.89	5.883	PTx-PS21C	30	2.16065	0.120843	3.90431	0.429374	0.424077
PTxS1	77	87	AGRGTGHFIGY	1135.56	5.31335	PTx	0	0	0
PTxS1	77	87	AGRGTGHFIGY	1135.56	5.32961	PTx	10	1.49641	0.156826
PTxS1	77	87	AGRGTGHFIGY	1135.56	5.30229	PTx	30	1.77764	0.294577	3.27405
PTxS1	77	87	AGRGTGHFIGY	1135.56	5.31335	PTx-PS21C	0	0	0
PTxS1	77	87	AGRGTGHFIGY	1135.56	5.2744	PTx-PS21C	10	1.36488	0.146966
PTxS1	77	87	AGRGTGHFIGY	1135.56	5.30089	PTx-PS21C	30	1.45822	0.145478	2.8231	0.450951	0.883731
PTxS1	77	89	AGRGTGHFIGYIY	1411.71	6.28481	PTx	0	0	0
PTxS1	77	89	AGRGTGHFIGYIY	1411.71	6.30086	PTx	10	1.3098	0.055985
PTxS1	77	89	AGRGTGHFIGYIY	1411.71	6.27579	PTx	30	1.36489	0.046614	2.67469
PTxS1	77	89	AGRGTGHFIGYIY	1411.71	6.28481	PTx-PS21C	0	0	0
PTxS1	77	89	AGRGTGHFIGYIY	1411.71	6.24323	PTx-PS21C	10	1.10217	0.090455
PTxS1	77	89	AGRGTGHFIGYIY	1411.71	6.27444	PTx-PS21C	30	1.21741	0.066132	2.31958	0.355112	0.271365
PTxS1	88	104	IYEVRADNNFYGAASSY	1939.88	6.68753	PTx	0	0	0
PTxS1	88	104	IYEVRADNNFYGAASSY	1939.88	6.70052	PTx	10	2.18426	0.058422
PTxS1	88	104	IYEVRADNNFYGAASSY	1939.88	6.67468	PTx	30	2.27026	0.02022	4.45452
PTxS1	88	104	IYEVRADNNFYGAASSY	1939.88	6.68753	PTx-PS21C	0	0	0
PTxS1	88	104	IYEVRADNNFYGAASSY	1939.88	6.64449	PTx-PS21C	10	1.78488	0.264916
PTxS1	88	104	IYEVRADNNFYGAASSY	1939.88	6.67097	PTx-PS21C	30	2.26003	0.031012	4.04491	0.409607	0.794748
PTxS1	90	98	EVRADNNFY	1127.51	5.85067	PTx	0	0	0
PTxS1	90	98	EVRADNNFY	1127.51	5.86494	PTx	10	0.445755	0.137381
PTxS1	90	98	EVRADNNFY	1127.51	5.84134	PTx	30	0.531725	0.083156	0.97748
PTxS1	90	98	EVRADNNFY	1127.51	5.85067	PTx-PS21C	0	0	0
PTxS1	90	98	EVRADNNFY	1127.51	5.81058	PTx-PS21C	10	0.398243	0.06785
PTxS1	90	98	EVRADNNFY	1127.51	5.84218	PTx-PS21C	30	0.44288	0.088261	0.841123	0.136357	0.412143
PTxS1	90	104	EVRADNNFYGAASSY	1663.73	6.34889	PTx	0	0	0
PTxS1	90	104	EVRADNNFYGAASSY	1663.73	6.35852	PTx	10	2.02338	0.067233
PTxS1	90	104	EVRADNNFYGAASSY	1663.73	6.33342	PTx	30	2.10842	0.106022	4.1318
PTxS1	90	104	EVRADNNFYGAASSY	1663.73	6.34889	PTx-PS21C	0	0	0
PTxS1	90	104	EVRADNNFYGAASSY	1663.73	6.30378	PTx-PS21C	10	1.74139	0.124586
PTxS1	90	104	EVRADNNFYGAASSY	1663.73	6.33003	PTx-PS21C	30	1.99051	0.044047	3.73189	0.399908	0.373758
PTxS1	91	97	VRADNNF	835.406	4.84024	PTx	0	0	0
PTxS1	91	97	VRADNNF	835.406	4.85913	PTx	10	0.582203	0.035806
PTxS1	91	97	VRADNNF	835.406	4.82689	PTx	30	0.651048	0.025867	1.23325
PTxS1	91	97	VRADNNF	835.406	4.84024	PTx-PS21C	0	0	0
PTxS1	91	97	VRADNNF	835.406	4.81202	PTx-PS21C	10	0.485685	0.060574
PTxS1	91	97	VRADNNF	835.406	4.83357	PTx-PS21C	30	0.508332	0.065359	0.994017	0.239234	0.196077
PTxS1	91	104	VRADNNFYGAASSY	1534.69	6.24344	PTx	0	0	0
PTxS1	91	104	VRADNNFYGAASSY	1534.69	6.25002	PTx	10	1.96296	0.072915
PTxS1	91	104	VRADNNFYGAASSY	1534.69	6.22894	PTx	30	1.98672	0.066182	3.94968
PTxS1	91	104	VRADNNFYGAASSY	1534.69	6.24344	PTx-PS21C	0	0	0
PTxS1	91	104	VRADNNFYGAASSY	1534.69	6.19951	PTx-PS21C	10	1.93438	0.181188
PTxS1	91	104	VRADNNFYGAASSY	1534.69	6.22466	PTx-PS21C	30	2.17576	0.063385	4.11014	-0.160456	0.543564
PTxS1	91	105	VRADNNFYGAASSYF	1681.76	7.36229	PTx	0	0	0
PTxS1	91	105	VRADNNFYGAASSYF	1681.76	7.36838	PTx	10	1.98449	0.074231
PTxS1	91	105	VRADNNFYGAASSYF	1681.76	7.34523	PTx	30	2.10213	0.037445	4.08662
PTxS1	91	105	VRADNNFYGAASSYF	1681.76	7.36229	PTx-PS21C	0	0	0
PTxS1	91	105	VRADNNFYGAASSYF	1681.76	7.32001	PTx-PS21C	10	1.75525	0.167256
PTxS1	91	105	VRADNNFYGAASSYF	1681.76	7.34613	PTx-PS21C	30	1.9274	0.158984	3.68265	0.403972	0.501768
PTxS1	91	106	VRADNNFYGAASSYFE	1810.8	7.29469	PTx	0	0	0
PTxS1	91	106	VRADNNFYGAASSYFE	1810.8	7.29747	PTx	10	2.21108	0.130246
PTxS1	91	106	VRADNNFYGAASSYFE	1810.8	7.27727	PTx	30	2.2847	0.103233	4.49578
PTxS1	91	106	VRADNNFYGAASSYFE	1810.8	7.29469	PTx-PS21C	0	0	0
PTxS1	91	106	VRADNNFYGAASSYFE	1810.8	7.25068	PTx-PS21C	10	1.95016	0.046571
PTxS1	91	106	VRADNNFYGAASSYFE	1810.8	7.27825	PTx-PS21C	30	2.23957	0.098954	4.18973	0.306044	0.390738
PTxS1	98	104	YGAASSY	718.304	5.48787	PTx	0	0	0
PTxS1	98	104	YGAASSY	718.304	5.50192	PTx	10	1.02591	0.033621
PTxS1	98	104	YGAASSY	718.304	5.47724	PTx	30	1.05773	0.032061	2.08364
PTxS1	98	104	YGAASSY	718.304	5.48787	PTx-PS21C	0	0	0
PTxS1	98	104	YGAASSY	718.304	5.4477	PTx-PS21C	10	0.950879	0.080067
PTxS1	98	104	YGAASSY	718.304	5.47332	PTx-PS21C	30	1.03142	0.050187	1.9823	0.10134	0.240201
PTxS1	105	119	FEYVDTYGDNAGRIL	1732.82	7.01294	PTx	0	0	0
PTxS1	105	119	FEYVDTYGDNAGRIL	1732.82	7.02399	PTx	10	1.92836	0.054336
PTxS1	105	119	FEYVDTYGDNAGRIL	1732.82	6.99958	PTx	30	2.38612	0.071443	4.31448
PTxS1	105	119	FEYVDTYGDNAGRIL	1732.82	7.01294	PTx-PS21C	0	0	0
PTxS1	105	119	FEYVDTYGDNAGRIL	1732.82	6.97414	PTx-PS21C	10	2.05427	0.156962
PTxS1	105	119	FEYVDTYGDNAGRIL	1732.82	7.00292	PTx-PS21C	30	2.67542	0.048476	4.72969	-0.415208	0.470886
PTxS1	105	120	FEYVDTYGDNAGRILA	1803.85	6.90852	PTx	0	0	0
PTxS1	105	120	FEYVDTYGDNAGRILA	1803.85	6.91445	PTx	10	2.2635	0.071412
PTxS1	105	120	FEYVDTYGDNAGRILA	1803.85	6.89259	PTx	30	2.69354	0.029756	4.95704
PTxS1	105	120	FEYVDTYGDNAGRILA	1803.85	6.90852	PTx-PS21C	0	0	0
PTxS1	105	120	FEYVDTYGDNAGRILA	1803.85	6.86478	PTx-PS21C	10	2.34972	0.090205
PTxS1	105	120	FEYVDTYGDNAGRILA	1803.85	6.88966	PTx-PS21C	30	3.02512	0.081399	5.37484	-0.4178	0.270615
PTxS1	105	123	FEYVDTYGDNAGRILAGAL	2045	7.7732	PTx	0	0	0
PTxS1	105	123	FEYVDTYGDNAGRILAGAL	2045	7.76351	PTx	10	2.42746	0.036326
PTxS1	105	123	FEYVDTYGDNAGRILAGAL	2045	7.73899	PTx	30	2.94378	0.100275	5.37124
PTxS1	105	123	FEYVDTYGDNAGRILAGAL	2045	7.7732	PTx-PS21C	0	0	0
PTxS1	105	123	FEYVDTYGDNAGRILAGAL	2045	7.71103	PTx-PS21C	10	2.60207	0.125502
PTxS1	105	123	FEYVDTYGDNAGRILAGAL	2045	7.73302	PTx-PS21C	30	3.50018	0.095154	6.10225	-0.731005	0.376506
PTxS1	105	125	FEYVDTYGDNAGRILAGALAT	2217.08	7.84184	PTx	0	0	0
PTxS1	105	125	FEYVDTYGDNAGRILAGALAT	2217.08	7.83089	PTx	10	2.76714	0.065354
PTxS1	105	125	FEYVDTYGDNAGRILAGALAT	2217.08	7.80505	PTx	30	3.58756	0.040831	6.35469
PTxS1	105	125	FEYVDTYGDNAGRILAGALAT	2217.08	7.84184	PTx-PS21C	0	0	0
PTxS1	105	125	FEYVDTYGDNAGRILAGALAT	2217.08	7.7829	PTx-PS21C	10	2.94416	0.180515
PTxS1	105	125	FEYVDTYGDNAGRILAGALAT	2217.08	7.80199	PTx-PS21C	30	4.14668	0.024148	7.09084	-0.736146	0.541545
PTxS1	106	119	EYVDTYGDNAGRIL	1585.75	6.55041	PTx	0	0	0
PTxS1	106	119	EYVDTYGDNAGRIL	1585.75	6.56593	PTx	10	1.82274	0.036267
PTxS1	106	119	EYVDTYGDNAGRIL	1585.75	6.53854	PTx	30	2.06897	0.057068	3.89172
PTxS1	106	119	EYVDTYGDNAGRIL	1585.75	6.55041	PTx-PS21C	0	0	0
PTxS1	106	119	EYVDTYGDNAGRIL	1585.75	6.50693	PTx-PS21C	10	1.92448	0.153924
PTxS1	106	119	EYVDTYGDNAGRIL	1585.75	6.53084	PTx-PS21C	30	2.31834	0.100799	4.24282	-0.351101	0.461772
PTxS1	106	123	EYVDTYGDNAGRILAGAL	1897.93	7.51916	PTx	0	0	0
PTxS1	106	123	EYVDTYGDNAGRILAGAL	1897.93	7.51674	PTx	10	2.51192	0.092552
PTxS1	106	123	EYVDTYGDNAGRILAGAL	1897.93	7.49386	PTx	30	2.98099	0.035891	5.49291
PTxS1	106	123	EYVDTYGDNAGRILAGAL	1897.93	7.51916	PTx-PS21C	0	0	0
PTxS1	106	123	EYVDTYGDNAGRILAGAL	1897.93	7.46936	PTx-PS21C	10	2.62417	0.047337
PTxS1	106	123	EYVDTYGDNAGRILAGAL	1897.93	7.48812	PTx-PS21C	30	3.59578	0.036616	6.21995	-0.727038	0.277656
PTxS1	107	119	YVDTYGDNAGRIL	1456.71	6.36896	PTx	0	0	0
PTxS1	107	119	YVDTYGDNAGRIL	1456.71	6.3799	PTx	10	1.9236	0.01463
PTxS1	107	119	YVDTYGDNAGRIL	1456.71	6.35498	PTx	30	2.40616	0.071135	4.32976
PTxS1	107	119	YVDTYGDNAGRIL	1456.71	6.36896	PTx-PS21C	0	0	0
PTxS1	107	119	YVDTYGDNAGRIL	1456.71	6.32553	PTx-PS21C	10	2.19125	0.193744
PTxS1	107	119	YVDTYGDNAGRIL	1456.71	6.34987	PTx-PS21C	30	2.75044	0.13289	4.94169	-0.611932	0.581232
PTxS1	107	120	YVDTYGDNAGRILA	1527.74	6.25208	PTx	0	0	0
PTxS1	107	120	YVDTYGDNAGRILA	1527.74	6.25709	PTx	10	2.00734	0.16507
PTxS1	107	120	YVDTYGDNAGRILA	1527.74	6.236	PTx	30	2.51013	0.077331	4.51747
PTxS1	107	120	YVDTYGDNAGRILA	1527.74	6.25208	PTx-PS21C	0	0	0
PTxS1	107	120	YVDTYGDNAGRILA	1527.74	6.20463	PTx-PS21C	10	2.06206	0.289599
PTxS1	107	120	YVDTYGDNAGRILA	1527.74	6.23215	PTx-PS21C	30	2.97957	0.184181	5.04163	-0.524159	0.868797
PTxS1	107	123	YVDTYGDNAGRILAGAL	1768.89	7.3939	PTx	0	0	0
PTxS1	107	123	YVDTYGDNAGRILAGAL	1768.89	7.39463	PTx	10	2.37278	0.054899
PTxS1	107	123	YVDTYGDNAGRILAGAL	1768.89	7.37073	PTx	30	2.88952	0.084975	5.26231
PTxS1	107	123	YVDTYGDNAGRILAGAL	1768.89	7.3939	PTx-PS21C	0	0	0
PTxS1	107	123	YVDTYGDNAGRILAGAL	1768.89	7.34682	PTx-PS21C	10	2.50151	0.240053
PTxS1	107	123	YVDTYGDNAGRILAGAL	1768.89	7.37103	PTx-PS21C	30	3.23283	0.073178	5.73434	-0.472034	0.720159
PTxS1	108	119	VDTYGDNAGRIL	1293.64	6.1234	PTx	0	0	0
PTxS1	108	119	VDTYGDNAGRIL	1293.64	6.13141	PTx	10	1.767	0.108987
PTxS1	108	119	VDTYGDNAGRIL	1293.64	6.11078	PTx	30	2.24668	0.100568	4.01368
PTxS1	108	119	VDTYGDNAGRIL	1293.64	6.1234	PTx-PS21C	0	0	0
PTxS1	108	119	VDTYGDNAGRIL	1293.64	6.07995	PTx-PS21C	10	2.02422	0.120793
PTxS1	108	119	VDTYGDNAGRIL	1293.64	6.10632	PTx-PS21C	30	2.59888	0.117792	4.6231	-0.609421	0.362379
PTxS1	108	120	VDTYGDNAGRILA	1364.68	5.99738	PTx	0	0	0
PTxS1	108	120	VDTYGDNAGRILA	1364.68	6.00531	PTx	10	2.15126	0.064058
PTxS1	108	120	VDTYGDNAGRILA	1364.68	5.9857	PTx	30	2.53181	0.083073	4.68307
PTxS1	108	120	VDTYGDNAGRILA	1364.68	5.99738	PTx-PS21C	0	0	0
PTxS1	108	120	VDTYGDNAGRILA	1364.68	5.9525	PTx-PS21C	10	2.42739	0.301565
PTxS1	108	120	VDTYGDNAGRILA	1364.68	5.97399	PTx-PS21C	30	3.1394	0.137482	5.56679	-0.883721	0.904695
PTxS1	108	123	VDTYGDNAGRILAGAL	1605.82	7.25749	PTx	0	0	0
PTxS1	108	123	VDTYGDNAGRILAGAL	1605.82	7.25881	PTx	10	2.06167	0.039628
PTxS1	108	123	VDTYGDNAGRILAGAL	1605.82	7.23785	PTx	30	2.5191	0.142328	4.58077
PTxS1	108	123	VDTYGDNAGRILAGAL	1605.82	7.25749	PTx-PS21C	0	0	0
PTxS1	108	123	VDTYGDNAGRILAGAL	1605.82	7.21155	PTx-PS21C	10	2.29416	0.127878
PTxS1	108	123	VDTYGDNAGRILAGAL	1605.82	7.23406	PTx-PS21C	30	2.88956	0.091808	5.18372	-0.602953	0.426984
PTxS1	110	123	TYGDNAGRILAGAL	1391.73	7.02957	PTx	0	0	0
PTxS1	110	123	TYGDNAGRILAGAL	1391.73	7.03471	PTx	10	1.90272	0.093349
PTxS1	110	123	TYGDNAGRILAGAL	1391.73	7.00798	PTx	30	2.49762	0.093747	4.40034
PTxS1	110	123	TYGDNAGRILAGAL	1391.73	7.02957	PTx-PS21C	0	0	0
PTxS1	110	123	TYGDNAGRILAGAL	1391.73	6.98274	PTx-PS21C	10	2.25855	0.193401
PTxS1	110	123	TYGDNAGRILAGAL	1391.73	7.01212	PTx-PS21C	30	2.84881	0.054957	5.10736	-0.707017	0.580203
PTxS1	124	130	ATYQSEY	861.362	5.74717	PTx	0	0	0
PTxS1	124	130	ATYQSEY	861.362	5.75957	PTx	10	0.186518	0.021718
PTxS1	124	130	ATYQSEY	861.362	5.73757	PTx	30	0.247511	0.047845	0.434029
PTxS1	124	130	ATYQSEY	861.362	5.74717	PTx-PS21C	0	0	0
PTxS1	124	130	ATYQSEY	861.362	5.70719	PTx-PS21C	10	0.1991	0.022804
PTxS1	124	130	ATYQSEY	861.362	5.73212	PTx-PS21C	30	0.266612	0.036344	0.465712	-0.031683	0.143535
PTxS1	141	160	IRRVTRVYHNGITGETTTTE	2304.21	4.56766	PTx	0	0	0
PTxS1	141	160	IRRVTRVYHNGITGETTTTE	2304.21	4.5579	PTx	10	3.44249	0.288319
PTxS1	141	160	IRRVTRVYHNGITGETTTTE	2304.21	4.52806	PTx	30	3.70397	0.354728	7.14646
PTxS1	141	160	IRRVTRVYHNGITGETTTTE	2304.21	4.56766	PTx-PS21C	0	0	0
PTxS1	141	160	IRRVTRVYHNGITGETTTTE	2304.21	4.52072	PTx-PS21C	10	3.35621	0.403291
PTxS1	141	160	IRRVTRVYHNGITGETTTTE	2304.21	4.54129	PTx-PS21C	30	3.42787	0.317902	6.78408	0.362384	1.20987
PTxS1	147	155	VYHNGITGE	989.469	4.88052	PTx	0	0	0
PTxS1	147	155	VYHNGITGE	989.469	4.89346	PTx	10	1.81443	0.139008
PTxS1	147	155	VYHNGITGE	989.469	4.87077	PTx	30	2.13325	0.092679	3.94767
PTxS1	147	155	VYHNGITGE	989.469	4.88052	PTx-PS21C	0	0	0
PTxS1	147	155	VYHNGITGE	989.469	4.8493	PTx-PS21C	10	1.72703	0.147735
PTxS1	147	155	VYHNGITGE	989.469	4.86926	PTx-PS21C	30	2.13463	0.135109	3.86166	0.086011	0.443205
PTxS1	147	160	VYHNGITGETTTTE	1522.7	5.06282	PTx	0	0	0
PTxS1	147	160	VYHNGITGETTTTE	1522.7	5.07917	PTx	10	2.74378	0.04817
PTxS1	147	160	VYHNGITGETTTTE	1522.7	5.06062	PTx	30	3.12816	0.066256	5.87194
PTxS1	147	160	VYHNGITGETTTTE	1522.7	5.06282	PTx-PS21C	0	0	0
PTxS1	147	160	VYHNGITGETTTTE	1522.7	5.02507	PTx-PS21C	10	2.62685	0.205695
PTxS1	147	160	VYHNGITGETTTTE	1522.7	5.054	PTx-PS21C	30	3.07247	0.094596	5.69932	0.172623	0.617085
PTxS1	147	161	VYHNGITGETTTTEY	1685.77	5.70261	PTx	0	0	0
PTxS1	147	161	VYHNGITGETTTTEY	1685.77	5.71358	PTx	10	2.95202	0.028458
PTxS1	147	161	VYHNGITGETTTTEY	1685.77	5.69052	PTx	30	3.22299	0.023109	6.175
PTxS1	147	161	VYHNGITGETTTTEY	1685.77	5.70261	PTx-PS21C	0	0	0
PTxS1	147	161	VYHNGITGETTTTEY	1685.77	5.66267	PTx-PS21C	10	2.80261	0.168644
PTxS1	147	161	VYHNGITGETTTTEY	1685.77	5.68523	PTx-PS21C	30	3.26245	0.088032	6.06506	0.109947	0.505932
PTxS1	147	164	VYHNGITGETTTTEYSNA	1957.88	5.52771	PTx	0	0	0
PTxS1	147	164	VYHNGITGETTTTEYSNA	1957.88	5.53869	PTx	10	4.26118	0.026825
PTxS1	147	164	VYHNGITGETTTTEYSNA	1957.88	5.51581	PTx	30	4.53679	0.052232	8.79797
PTxS1	147	164	VYHNGITGETTTTEYSNA	1957.88	5.52771	PTx-PS21C	0	0	0
PTxS1	147	164	VYHNGITGETTTTEYSNA	1957.88	5.48846	PTx-PS21C	10	3.72058	0.42524
PTxS1	147	164	VYHNGITGETTTTEYSNA	1957.88	5.5107	PTx-PS21C	30	4.61473	0.208136	8.33531	0.46266	1.27572
PTxS1	164	191	ARYVSQQTRANPNPYTSRRSVASIVGTL	3092.63	6.04556	PTx	0	0	0
PTxS1	164	191	ARYVSQQTRANPNPYTSRRSVASIVGTL	3092.63	6.04551	PTx	10	7.81934	0.06246
PTxS1	164	191	ARYVSQQTRANPNPYTSRRSVASIVGTL	3092.63	6.0213	PTx	30	8.33555	0.103602	16.1549
PTxS1	164	191	ARYVSQQTRANPNPYTSRRSVASIVGTL	3092.63	6.04556	PTx-PS21C	0	0	0
PTxS1	164	191	ARYVSQQTRANPNPYTSRRSVASIVGTL	3092.63	5.99109	PTx-PS21C	10	6.21312	0.199088
PTxS1	164	191	ARYVSQQTRANPNPYTSRRSVASIVGTL	3092.63	6.02104	PTx-PS21C	30	6.69398	0.183801	12.9071	3.24778	0.597264
PTxS1	165	185	RYVSQQTRANPNPYTSRRSVA	2451.26	4.42956	PTx	0	0	0
PTxS1	165	185	RYVSQQTRANPNPYTSRRSVA	2451.26	4.4282	PTx	10	6.30258	0.28335
PTxS1	165	185	RYVSQQTRANPNPYTSRRSVA	2451.26	4.40277	PTx	30	6.50856	0.279397	12.8111
PTxS1	165	185	RYVSQQTRANPNPYTSRRSVA	2451.26	4.42956	PTx-PS21C	0	0	0
PTxS1	165	185	RYVSQQTRANPNPYTSRRSVA	2451.26	4.39027	PTx-PS21C	10	4.40275	0.231461
PTxS1	165	185	RYVSQQTRANPNPYTSRRSVA	2451.26	4.40406	PTx-PS21C	30	5.03982	0.2375	9.44257	3.36857	0.85005
PTxS1	165	191	RYVSQQTRANPNPYTSRRSVASIVGTL	3021.6	6.03632	PTx	0	0	0
PTxS1	165	191	RYVSQQTRANPNPYTSRRSVASIVGTL	3021.6	6.03726	PTx	10	7.51685	0.173278
PTxS1	165	191	RYVSQQTRANPNPYTSRRSVASIVGTL	3021.6	6.01237	PTx	30	7.80858	0.212446	15.3254
PTxS1	165	191	RYVSQQTRANPNPYTSRRSVASIVGTL	3021.6	6.03632	PTx-PS21C	0	0	0
PTxS1	165	191	RYVSQQTRANPNPYTSRRSVASIVGTL	3021.6	5.98362	PTx-PS21C	10	5.76649	0.253697
PTxS1	165	191	RYVSQQTRANPNPYTSRRSVASIVGTL	3021.6	6.0092	PTx-PS21C	30	6.34199	0.251564	12.1085	3.21695	0.761091
PTxS1	170	181	QTRANPNPYTSR	1404.7	4.23182	PTx	0	0	0
PTxS1	170	181	QTRANPNPYTSR	1404.7	4.22806	PTx	10	2.10564	0.104496
PTxS1	170	181	QTRANPNPYTSR	1404.7	4.20636	PTx	30	2.11139	0.183153	4.21703
PTxS1	170	181	QTRANPNPYTSR	1404.7	4.23182	PTx-PS21C	0	0	0
PTxS1	170	181	QTRANPNPYTSR	1404.7	4.20103	PTx-PS21C	10	1.2694	0.095108
PTxS1	170	181	QTRANPNPYTSR	1404.7	4.2036	PTx-PS21C	30	1.52027	0.153778	2.78968	1.42735	0.549459
PTxS1	173	181	ANPNPYTSR	1019.49	4.60465	PTx	0	0	0
PTxS1	173	181	ANPNPYTSR	1019.49	4.61126	PTx	10	1.42875	0.129778
PTxS1	173	181	ANPNPYTSR	1019.49	4.58697	PTx	30	1.53597	0.128776	2.96472
PTxS1	173	181	ANPNPYTSR	1019.49	4.60465	PTx-PS21C	0	0	0
PTxS1	173	181	ANPNPYTSR	1019.49	4.57286	PTx-PS21C	10	0.657669	0.140629
PTxS1	173	181	ANPNPYTSR	1019.49	4.59003	PTx-PS21C	30	0.799475	0.129724	1.45714	1.50757	0.421887
PTxS1	211	222	AMAAWSERAGEA	1249.56	7.00724	PTx	0	0	0
PTxS1	211	222	AMAAWSERAGEA	1249.56	7.01964	PTx	10	3.20124	0.207978
PTxS1	211	222	AMAAWSERAGEA	1249.56	6.99473	PTx	30	3.27695	0.210708	6.47819
PTxS1	211	222	AMAAWSERAGEA	1249.56	7.00724	PTx-PS21C	0	0	0
PTxS1	211	222	AMAAWSERAGEA	1249.56	6.96876	PTx-PS21C	10	3.13304	0.252209
PTxS1	211	222	AMAAWSERAGEA	1249.56	6.99342	PTx-PS21C	30	3.23576	0.273794	6.3688	0.109386	0.821382
PTxS1	213	222	AAWSERAGEA	1047.49	5.18871	PTx	0	0	0
PTxS1	213	222	AAWSERAGEA	1047.49	5.2008	PTx	10	3.53246	0.147091
PTxS1	213	222	AAWSERAGEA	1047.49	5.18161	PTx	30	3.54418	0.114815	7.07664
PTxS1	213	222	AAWSERAGEA	1047.49	5.18871	PTx-PS21C	0	0	0
PTxS1	213	222	AAWSERAGEA	1047.49	5.14664	PTx-PS21C	10	3.55036	0.284848
PTxS1	213	222	AAWSERAGEA	1047.49	5.17533	PTx-PS21C	30	3.67255	0.135495	7.2229	-0.146265	0.854544
PTxS1	215	222	WSERAGEA	905.411	4.79919	PTx	0	0	0
PTxS1	215	222	WSERAGEA	905.411	4.80739	PTx	10	2.29796	0.124124
PTxS1	215	222	WSERAGEA	905.411	4.78022	PTx	30	2.36333	0.121157	4.6613
PTxS1	215	222	WSERAGEA	905.411	4.79919	PTx-PS21C	0	0	0
PTxS1	215	222	WSERAGEA	905.411	4.76175	PTx-PS21C	10	2.23584	0.168699
PTxS1	215	222	WSERAGEA	905.411	4.78437	PTx-PS21C	30	2.3207	0.143404	4.55654	0.104758	0.506097
PTxS1	215	223	WSERAGEAM	1036.45	5.45985	PTx	0	0	0
PTxS1	215	223	WSERAGEAM	1036.45	5.47177	PTx	10	2.94358	0.116525
PTxS1	215	223	WSERAGEAM	1036.45	5.44698	PTx	30	2.9335	0.174581	5.87708
PTxS1	215	223	WSERAGEAM	1036.45	5.45985	PTx-PS21C	0	0	0
PTxS1	215	223	WSERAGEAM	1036.45	5.41568	PTx-PS21C	10	3.19928	0.15439
PTxS1	215	223	WSERAGEAM	1036.45	5.44048	PTx-PS21C	30	3.40815	0.178167	6.60743	-0.730345	0.534501
PTxS1	226	232	VYYESIA	844.409	6.52528	PTx	0	0	0
PTxS1	226	232	VYYESIA	844.409	6.53906	PTx	10	0.212565	0.025113
PTxS1	226	232	VYYESIA	844.409	6.51319	PTx	30	0.270735	0.027034	0.4833
PTxS1	226	232	VYYESIA	844.409	6.52528	PTx-PS21C	0	0	0
PTxS1	226	232	VYYESIA	844.409	6.48173	PTx-PS21C	10	0.182726	0.029135
PTxS1	226	232	VYYESIA	844.409	6.50828	PTx-PS21C	30	0.325971	0.031714	0.508697	-0.025397	0.095142
PTxS1	229	235	ESIAYSF	816.377	7.4113	PTx	0	0	0
PTxS1	229	235	ESIAYSF	816.377	7.42004	PTx	10	1.34088	0.037264
PTxS1	229	235	ESIAYSF	816.377	7.39686	PTx	30	1.68421	0.017716	3.02509
PTxS1	229	235	ESIAYSF	816.377	7.4113	PTx-PS21C	0	0	0
PTxS1	229	235	ESIAYSF	816.377	7.37142	PTx-PS21C	10	1.3531	0.089511
PTxS1	229	235	ESIAYSF	816.377	7.39478	PTx-PS21C	30	1.72929	0.040082	3.08239	-0.057296	0.268533
PTxS2	1	12	STPGIVIPPQEQ	1265.67	6.11158	PTx	0	0	0
PTxS2	1	12	STPGIVIPPQEQ	1265.67	6.1177	PTx	10	3.02031	0.042946
PTxS2	1	12	STPGIVIPPQEQ	1265.67	6.10004	PTx	30	3.42176	0.102913	6.44207
PTxS2	1	12	STPGIVIPPQEQ	1265.67	6.11158	PTx-PS21C	0	0	0
PTxS2	1	12	STPGIVIPPQEQ	1265.67	6.06896	PTx-PS21C	10	2.68944	0.288712
PTxS2	1	12	STPGIVIPPQEQ	1265.67	6.08942	PTx-PS21C	30	3.2639	0.1292	5.95334	0.488726	0.866136
PTxS2	18	26	SPYGRCANK	995.473	4.52409	PTx	0	0	0
PTxS2	18	26	SPYGRCANK	995.473	4.53139	PTx	10	0.187747	0.11126
PTxS2	18	26	SPYGRCANK	995.473	4.50591	PTx	30	0.151462	0.048612	0.339209
PTxS2	18	26	SPYGRCANK	995.473	4.52409	PTx-PS21C	0	0	0
PTxS2	18	26	SPYGRCANK	995.473	4.49249	PTx-PS21C	10	0.1246	0.029436
PTxS2	18	26	SPYGRCANK	995.473	4.51127	PTx-PS21C	30	0.169782	0.051424	0.294382	0.044827	0.33378
PTxS2	23	30	CANKTRAL	876.472	6.37466	PTx	0	0	0
PTxS2	23	30	CANKTRAL	876.472	6.38708	PTx	10	0.049689	0.022953
PTxS2	23	30	CANKTRAL	876.472	6.36356	PTx	30	0.049067	0.022565	0.098756
PTxS2	23	30	CANKTRAL	876.472	6.37466	PTx-PS21C	0	0	0
PTxS2	23	30	CANKTRAL	876.472	6.33326	PTx-PS21C	10	0.076348	0.030706
PTxS2	23	30	CANKTRAL	876.472	6.3612	PTx-PS21C	30	0.086728	0.025265	0.163076	-0.06432	0.092118
PTxS2	33	43	AELRGSGDLQE	1174.57	5.02044	PTx	0	0	0
PTxS2	33	43	AELRGSGDLQE	1174.57	5.03715	PTx	10	1.92798	0.136923
PTxS2	33	43	AELRGSGDLQE	1174.57	5.01552	PTx	30	2.40526	0.115174	4.33324
PTxS2	33	43	AELRGSGDLQE	1174.57	5.02044	PTx-PS21C	0	0	0
PTxS2	33	43	AELRGSGDLQE	1174.57	4.9819	PTx-PS21C	10	1.56616	0.203728
PTxS2	33	43	AELRGSGDLQE	1174.57	5.00949	PTx-PS21C	30	2.12209	0.107567	3.68825	0.644997	0.611184
PTxS2	35	43	LRGSGDLQE	974.49	4.65916	PTx	0	0	0
PTxS2	35	43	LRGSGDLQE	974.49	4.66481	PTx	10	1.87441	0.150013
PTxS2	35	43	LRGSGDLQE	974.49	4.63767	PTx	30	2.33027	0.113916	4.20469
PTxS2	35	43	LRGSGDLQE	974.49	4.65916	PTx-PS21C	0	0	0
PTxS2	35	43	LRGSGDLQE	974.49	4.62402	PTx-PS21C	10	1.68099	0.133468
PTxS2	35	43	LRGSGDLQE	974.49	4.64494	PTx-PS21C	30	2.00663	0.11978	3.68762	0.517066	0.450039
PTxS2	36	43	RGSGDLQE	861.406	4.19738	PTx	0	0	0
PTxS2	36	43	RGSGDLQE	861.406	4.20316	PTx	10	1.70072	0.060106
PTxS2	36	43	RGSGDLQE	861.406	4.18213	PTx	30	1.99612	0.058993	3.69685
PTxS2	36	43	RGSGDLQE	861.406	4.19738	PTx-PS21C	0	0	0
PTxS2	36	43	RGSGDLQE	861.406	4.16041	PTx-PS21C	10	1.51865	0.067186
PTxS2	36	43	RGSGDLQE	861.406	4.18011	PTx-PS21C	30	1.83538	0.053066	3.35403	0.342823	0.201558
PTxS2	44	52	YLRHVTRGW	1187.64	4.89706	PTx	0	0	0
PTxS2	44	52	YLRHVTRGW	1187.64	4.92738	PTx	10	1.9185	0.137597
PTxS2	44	52	YLRHVTRGW	1187.64	4.8947	PTx	30	1.95627	0.157057	3.87478
PTxS2	44	52	YLRHVTRGW	1187.64	4.89706	PTx-PS21C	0	0	0
PTxS2	44	52	YLRHVTRGW	1187.64	4.87233	PTx-PS21C	10	1.75512	0.181439
PTxS2	44	52	YLRHVTRGW	1187.64	4.90445	PTx-PS21C	30	1.79249	0.154042	3.54761	0.327166	0.544317
PTxS2	44	55	YLRHVTRGWSIF	1534.83	6.40748	PTx	0	0	0
PTxS2	44	55	YLRHVTRGWSIF	1534.83	6.42514	PTx	10	2.82418	0.067887
PTxS2	44	55	YLRHVTRGWSIF	1534.83	6.3959	PTx	30	2.98182	0.110763	5.806
PTxS2	44	55	YLRHVTRGWSIF	1534.83	6.40748	PTx-PS21C	0	0	0
PTxS2	44	55	YLRHVTRGWSIF	1534.83	6.36398	PTx-PS21C	10	2.60035	0.153455
PTxS2	44	55	YLRHVTRGWSIF	1534.83	6.39338	PTx-PS21C	30	2.83685	0.098038	5.4372	0.368798	0.460365
PTxS2	56	72	ALYDGTYLGGEYGGVIK	1775.88	6.96261	PTx	0	0	0
PTxS2	56	72	ALYDGTYLGGEYGGVIK	1775.88	6.97123	PTx	10	2.80229	0.075746
PTxS2	56	72	ALYDGTYLGGEYGGVIK	1775.88	6.94989	PTx	30	2.98047	0.07676	5.78276
PTxS2	56	72	ALYDGTYLGGEYGGVIK	1775.88	6.96261	PTx-PS21C	0	0	0
PTxS2	56	72	ALYDGTYLGGEYGGVIK	1775.88	6.92319	PTx-PS21C	10	2.40971	0.215076
PTxS2	56	72	ALYDGTYLGGEYGGVIK	1775.88	6.94707	PTx-PS21C	30	2.71518	0.089523	5.12489	0.657878	0.645228
PTxS2	56	80	ALYDGTYLGGEYGGVIKDGTPGGAF	2478.18	7.4532	PTx	0	0	0
PTxS2	56	80	ALYDGTYLGGEYGGVIKDGTPGGAF	2478.18	7.45614	PTx	10	4.2022	0.091231
PTxS2	56	80	ALYDGTYLGGEYGGVIKDGTPGGAF	2478.18	7.43429	PTx	30	4.67039	0.08981	8.87259
PTxS2	56	80	ALYDGTYLGGEYGGVIKDGTPGGAF	2478.18	7.4532	PTx-PS21C	0	0	0
PTxS2	56	80	ALYDGTYLGGEYGGVIKDGTPGGAF	2478.18	7.41055	PTx-PS21C	10	3.60319	0.283583
PTxS2	56	80	ALYDGTYLGGEYGGVIKDGTPGGAF	2478.18	7.43043	PTx-PS21C	30	4.23569	0.060257	7.83888	1.0337	0.850749
PTxS2	58	72	YDGTYLGGEYGGVIK	1591.76	6.56406	PTx	0	0	0
PTxS2	58	72	YDGTYLGGEYGGVIK	1591.76	6.57761	PTx	10	2.59614	0.055185
PTxS2	58	72	YDGTYLGGEYGGVIK	1591.76	6.55061	PTx	30	2.6513	0.047722	5.24744
PTxS2	58	72	YDGTYLGGEYGGVIK	1591.76	6.56406	PTx-PS21C	0	0	0
PTxS2	58	72	YDGTYLGGEYGGVIK	1591.76	6.51989	PTx-PS21C	10	2.20294	0.202698
PTxS2	58	72	YDGTYLGGEYGGVIK	1591.76	6.54132	PTx-PS21C	30	2.46886	0.059253	4.67179	0.575648	0.608094
PTxS2	58	80	YDGTYLGGEYGGVIKDGTPGGAF	2294.06	7.19755	PTx	0	0	0
PTxS2	58	80	YDGTYLGGEYGGVIKDGTPGGAF	2294.06	7.20249	PTx	10	4.16859	0.106433
PTxS2	58	80	YDGTYLGGEYGGVIKDGTPGGAF	2294.06	7.18392	PTx	30	4.69267	0.103864	8.86126
PTxS2	58	80	YDGTYLGGEYGGVIKDGTPGGAF	2294.06	7.19755	PTx-PS21C	0	0	0
PTxS2	58	80	YDGTYLGGEYGGVIKDGTPGGAF	2294.06	7.15813	PTx-PS21C	10	3.53684	0.307221
PTxS2	58	80	YDGTYLGGEYGGVIKDGTPGGAF	2294.06	7.18127	PTx-PS21C	30	4.15484	0.034595	7.69168	1.16958	0.921663
PTxS2	59	72	DGTYLGGEYGGVIK	1428.7	6.48812	PTx	0	0	0
PTxS2	59	72	DGTYLGGEYGGVIK	1428.7	6.50029	PTx	10	2.55887	0.045155
PTxS2	59	72	DGTYLGGEYGGVIK	1428.7	6.47441	PTx	30	2.76023	0.033833	5.3191
PTxS2	59	72	DGTYLGGEYGGVIK	1428.7	6.48812	PTx-PS21C	0	0	0
PTxS2	59	72	DGTYLGGEYGGVIK	1428.7	6.44671	PTx-PS21C	10	2.28226	0.171424
PTxS2	59	72	DGTYLGGEYGGVIK	1428.7	6.46615	PTx-PS21C	30	2.41615	0.067343	4.69841	0.62069	0.514272
PTxS2	60	71	GTYLGGEYGGVI	1185.58	4.60862	PTx	0	0	0
PTxS2	60	71	GTYLGGEYGGVI	1185.58	4.61365	PTx	10	1.13611	0.102746
PTxS2	60	71	GTYLGGEYGGVI	1185.58	4.58286	PTx	30	1.29073	0.075267	2.42684
PTxS2	60	71	GTYLGGEYGGVI	1185.58	4.60862	PTx-PS21C	0	0	0
PTxS2	60	71	GTYLGGEYGGVI	1185.58	4.57315	PTx-PS21C	10	0.989659	0.171197
PTxS2	60	71	GTYLGGEYGGVI	1185.58	4.59728	PTx-PS21C	30	1.14837	0.140647	2.13803	0.288812	0.513591
PTxS2	60	72	GTYLGGEYGGVIK	1313.67	6.20786	PTx	0	0	0
PTxS2	60	72	GTYLGGEYGGVIK	1313.67	6.21623	PTx	10	2.67274	0.065307
PTxS2	60	72	GTYLGGEYGGVIK	1313.67	6.19688	PTx	30	2.85698	0.059145	5.52973
PTxS2	60	72	GTYLGGEYGGVIK	1313.67	6.20786	PTx-PS21C	0	0	0
PTxS2	60	72	GTYLGGEYGGVIK	1313.67	6.16582	PTx-PS21C	10	2.22889	0.151573
PTxS2	60	72	GTYLGGEYGGVIK	1313.67	6.19056	PTx-PS21C	30	2.60918	0.052773	4.83807	0.691657	0.454719
PTxS2	60	80	GTYLGGEYGGVIKDGTPGGAF	2015.97	6.93961	PTx	0	0	0
PTxS2	60	80	GTYLGGEYGGVIKDGTPGGAF	2015.97	6.94698	PTx	10	4.10769	0.117038
PTxS2	60	80	GTYLGGEYGGVIKDGTPGGAF	2015.97	6.92535	PTx	30	4.64385	0.117689	8.75154
PTxS2	60	80	GTYLGGEYGGVIKDGTPGGAF	2015.97	6.93961	PTx-PS21C	0	0	0
PTxS2	60	80	GTYLGGEYGGVIKDGTPGGAF	2015.97	6.89896	PTx-PS21C	10	3.49808	0.271132
PTxS2	60	80	GTYLGGEYGGVIKDGTPGGAF	2015.97	6.92188	PTx-PS21C	30	4.13221	0.081216	7.63028	1.12126	0.813396
PTxS2	73	80	DGTPGGAF	721.315	6.37625	PTx	0	0	0
PTxS2	73	80	DGTPGGAF	721.315	6.38441	PTx	10	0.667486	0.026748
PTxS2	73	80	DGTPGGAF	721.315	6.3638	PTx	30	0.885432	0.039807	1.55292
PTxS2	73	80	DGTPGGAF	721.315	6.37625	PTx-PS21C	0	0	0
PTxS2	73	80	DGTPGGAF	721.315	6.33269	PTx-PS21C	10	0.578096	0.030277
PTxS2	73	80	DGTPGGAF	721.315	6.354	PTx-PS21C	30	0.700039	0.027487	1.27814	0.274783	0.119421
PTxS2	73	82	DGTPGGAFDL	949.426	7.73691	PTx	0	0	0
PTxS2	73	82	DGTPGGAFDL	949.426	7.73519	PTx	10	0.874477	0.070894
PTxS2	73	82	DGTPGGAFDL	949.426	7.71228	PTx	30	1.28421	0.059239	2.15869
PTxS2	73	82	DGTPGGAFDL	949.426	7.73691	PTx-PS21C	0	0	0
PTxS2	73	82	DGTPGGAFDL	949.426	7.68648	PTx-PS21C	10	0.623021	0.072363
PTxS2	73	82	DGTPGGAFDL	949.426	7.6945	PTx-PS21C	30	0.885378	0.228936	1.5084	0.650286	0.686808
PTxS2	74	80	GTPGGAF	606.288	5.91984	PTx	0	0	0
PTxS2	74	80	GTPGGAF	606.288	5.93665	PTx	10	0.390743	0.090694
PTxS2	74	80	GTPGGAF	606.288	5.91198	PTx	30	0.592068	0.057091	0.982811
PTxS2	74	80	GTPGGAF	606.288	5.91984	PTx-PS21C	0	0	0
PTxS2	74	80	GTPGGAF	606.288	5.87828	PTx-PS21C	10	0.384774	0.03903
PTxS2	74	80	GTPGGAF	606.288	5.90517	PTx-PS21C	30	0.455881	0.033756	0.840655	0.142156	0.272082
PTxS2	90	105	TTRNTGQPATDHYYSN	1825.81	4.50118	PTx	0	0	0
PTxS2	90	105	TTRNTGQPATDHYYSN	1825.81	4.49922	PTx	10	3.48389	0.174548
PTxS2	90	105	TTRNTGQPATDHYYSN	1825.81	4.47658	PTx	30	3.57708	0.178298	7.06097
PTxS2	90	105	TTRNTGQPATDHYYSN	1825.81	4.50118	PTx-PS21C	0	0	0
PTxS2	90	105	TTRNTGQPATDHYYSN	1825.81	4.46079	PTx-PS21C	10	3.40661	0.148887
PTxS2	90	105	TTRNTGQPATDHYYSN	1825.81	4.47616	PTx-PS21C	30	3.57587	0.237918	6.98248	0.078494	0.713754
PTxS2	90	111	TTRNTGQPATDHYYSNVTATRL	2467.2	5.50562	PTx	0	0	0
PTxS2	90	111	TTRNTGQPATDHYYSNVTATRL	2467.2	5.51727	PTx	10	3.45552	0.0686
PTxS2	90	111	TTRNTGQPATDHYYSNVTATRL	2467.2	5.49187	PTx	30	3.66898	0.087053	7.12449
PTxS2	90	111	TTRNTGQPATDHYYSNVTATRL	2467.2	5.50562	PTx-PS21C	0	0	0
PTxS2	90	111	TTRNTGQPATDHYYSNVTATRL	2467.2	5.46369	PTx-PS21C	10	3.05748	0.189439
PTxS2	90	111	TTRNTGQPATDHYYSNVTATRL	2467.2	5.4915	PTx-PS21C	30	3.50534	0.142544	6.56282	0.561673	0.568317
PTxS2	112	118	LSSTNSR	764.39	4.55533	PTx	0	0	0
PTxS2	112	118	LSSTNSR	764.39	4.56913	PTx	10	1.13469	0.023477
PTxS2	112	118	LSSTNSR	764.39	4.53927	PTx	30	1.20516	0.022066	2.33986
PTxS2	112	118	LSSTNSR	764.39	4.55533	PTx-PS21C	0	0	0
PTxS2	112	118	LSSTNSR	764.39	4.52945	PTx-PS21C	10	1.07251	0.020021
PTxS2	112	118	LSSTNSR	764.39	4.55122	PTx-PS21C	30	0.947149	0.165116	2.01966	0.320198	0.495348
PTxS2	112	119	LSSTNSRL	877.474	4.56893	PTx	0	0	0
PTxS2	112	119	LSSTNSRL	877.474	4.56856	PTx	10	1.32982	0.150572
PTxS2	112	119	LSSTNSRL	877.474	4.53889	PTx	30	1.43021	0.145489	2.76003
PTxS2	112	119	LSSTNSRL	877.474	4.56893	PTx-PS21C	0	0	0
PTxS2	112	119	LSSTNSRL	877.474	4.54153	PTx-PS21C	10	1.21223	0.142181
PTxS2	112	119	LSSTNSRL	877.474	4.5511	PTx-PS21C	30	1.30402	0.154372	2.51626	0.243774	0.463116
PTxS2	112	121	LSSTNSRLCA	1051.52	4.90093	PTx	0	0	0
PTxS2	112	121	LSSTNSRLCA	1051.52	4.92511	PTx	10	1.39496	0.088453
PTxS2	112	121	LSSTNSRLCA	1051.52	4.89715	PTx	30	1.40387	0.107306	2.79883
PTxS2	112	121	LSSTNSRLCA	1051.52	4.90093	PTx-PS21C	0	0	0
PTxS2	112	121	LSSTNSRLCA	1051.52	4.86838	PTx-PS21C	10	1.2129	0.084773
PTxS2	112	121	LSSTNSRLCA	1051.52	4.90389	PTx-PS21C	30	1.32175	0.082023	2.53465	0.264179	0.321918
PTxS2	127	142	GQPVIGACTSPYDGKY	1655.77	6.21493	PTx	0	0	0
PTxS2	127	142	GQPVIGACTSPYDGKY	1655.77	6.22425	PTx	10	2.60382	0.088492
PTxS2	127	142	GQPVIGACTSPYDGKY	1655.77	6.20406	PTx	30	2.92405	0.029823	5.52787
PTxS2	127	142	GQPVIGACTSPYDGKY	1655.77	6.21493	PTx-PS21C	0	0	0
PTxS2	127	142	GQPVIGACTSPYDGKY	1655.77	6.17366	PTx-PS21C	10	2.44615	0.19388
PTxS2	127	142	GQPVIGACTSPYDGKY	1655.77	6.19923	PTx-PS21C	30	2.98683	0.051222	5.43298	0.09489	0.58164
PTxS2	129	136	PVIGACTS	747.371	6.33197	PTx	0	0	0
PTxS2	129	136	PVIGACTS	747.371	6.3487	PTx	10	0.209562	0.030614
PTxS2	129	136	PVIGACTS	747.371	6.32525	PTx	30	0.205122	0.023055	0.414684
PTxS2	129	136	PVIGACTS	747.371	6.33197	PTx-PS21C	0	0	0
PTxS2	129	136	PVIGACTS	747.371	6.29131	PTx-PS21C	10	0.204887	0.028762
PTxS2	129	136	PVIGACTS	747.371	6.32215	PTx-PS21C	30	0.184962	0.028479	0.389849	0.024835	0.091842
PTxS2	146	155	YSRLRKMLYL	1342.77	5.91716	PTx	0	0	0
PTxS2	146	155	YSRLRKMLYL	1342.77	5.93352	PTx	10	0.021233	0.086563
PTxS2	146	155	YSRLRKMLYL	1342.77	5.90962	PTx	30	0.066712	0.055847	0.087945
PTxS2	146	155	YSRLRKMLYL	1342.77	5.91716	PTx-PS21C	0	0	0
PTxS2	146	155	YSRLRKMLYL	1342.77	5.87765	PTx-PS21C	10	-0.016646	0.056668
PTxS2	146	155	YSRLRKMLYL	1342.77	5.90764	PTx-PS21C	30	0.021888	0.079925	0.005242	0.082703	0.259689
PTxS2	156	162	IYVAGIS	722.408	6.3998	PTx	0	0	0
PTxS2	156	162	IYVAGIS	722.408	6.41059	PTx	10	0.710859	0.03154
PTxS2	156	162	IYVAGIS	722.408	6.38688	PTx	30	0.820529	0.054562	1.53139
PTxS2	156	162	IYVAGIS	722.408	6.3998	PTx-PS21C	0	0	0
PTxS2	156	162	IYVAGIS	722.408	6.35613	PTx-PS21C	10	0.671377	0.03658
PTxS2	156	162	IYVAGIS	722.408	6.38048	PTx-PS21C	30	0.78801	0.025434	1.45939	0.072001	0.163686
PTxS2	156	163	IYVAGISV	821.477	7.55638	PTx	0	0	0
PTxS2	156	163	IYVAGISV	821.477	7.56455	PTx	10	0.750916	0.0294
PTxS2	156	163	IYVAGISV	821.477	7.54114	PTx	30	0.870402	0.034745	1.62132
PTxS2	156	163	IYVAGISV	821.477	7.55638	PTx-PS21C	0	0	0
PTxS2	156	163	IYVAGISV	821.477	7.51568	PTx-PS21C	10	0.674973	0.038301
PTxS2	156	163	IYVAGISV	821.477	7.53725	PTx-PS21C	30	0.787638	0.046527	1.46261	0.158707	0.139581
PTxS2	162	168	SVRVHVS	783.447	4.72725	PTx	0	0	0
PTxS2	162	168	SVRVHVS	783.447	4.73808	PTx	10	0.15265	0.060886
PTxS2	162	168	SVRVHVS	783.447	4.70076	PTx	30	0.17083	0.058182	0.32348
PTxS2	162	168	SVRVHVS	783.447	4.72725	PTx-PS21C	0	0	0
PTxS2	162	168	SVRVHVS	783.447	4.69326	PTx-PS21C	10	0.127942	0.058132
PTxS2	162	168	SVRVHVS	783.447	4.717	PTx-PS21C	30	-0.021276	0.062003	0.106666	0.216814	0.186009
PTxS2	182	190	ETYALTGIS	954.478	6.77786	PTx	0	0	0
PTxS2	182	190	ETYALTGIS	954.478	6.79079	PTx	10	0.25981	0.019392
PTxS2	182	190	ETYALTGIS	954.478	6.7658	PTx	30	0.224567	0.044921	0.484377
PTxS2	182	190	ETYALTGIS	954.478	6.77786	PTx-PS21C	0	0	0
PTxS2	182	190	ETYALTGIS	954.478	6.73604	PTx-PS21C	10	0.2163	0.029963
PTxS2	182	190	ETYALTGIS	954.478	6.75895	PTx-PS21C	30	0.234435	0.057106	0.450735	0.033642	0.171318
PTxS2	187	199	TGISICNPGSSLC	1251.57	7.31822	PTx	0	0	0
PTxS2	187	199	TGISICNPGSSLC	1251.57	7.32514	PTx	10	3.29216	0.169818
PTxS2	187	199	TGISICNPGSSLC	1251.57	7.30422	PTx	30	3.33235	0.133663	6.62452
PTxS2	187	199	TGISICNPGSSLC	1251.57	7.31822	PTx-PS21C	0	0	0
PTxS2	187	199	TGISICNPGSSLC	1251.57	7.27728	PTx-PS21C	10	3.29124	0.103466
PTxS2	187	199	TGISICNPGSSLC	1251.57	7.30147	PTx-PS21C	30	3.47477	0.15243	6.76601	-0.141496	0.509454
PTxS2	189	199	ISICNPGSSLC	1093.5	7.14809	PTx	0	0	0
PTxS2	189	199	ISICNPGSSLC	1093.5	7.15589	PTx	10	3.21454	0.05023
PTxS2	189	199	ISICNPGSSLC	1093.5	7.13495	PTx	30	3.26693	0.062222	6.48147
PTxS2	189	199	ISICNPGSSLC	1093.5	7.14809	PTx-PS21C	0	0	0
PTxS2	189	199	ISICNPGSSLC	1093.5	7.10783	PTx-PS21C	10	3.32971	0.071487
PTxS2	189	199	ISICNPGSSLC	1093.5	7.13428	PTx-PS21C	30	3.51026	0.133618	6.83997	-0.358502	0.400854
PTxS2	191	199	ICNPGSSLC	893.385	6.33046	PTx	0	0	0
PTxS2	191	199	ICNPGSSLC	893.385	6.33694	PTx	10	2.41059	0.0429
PTxS2	191	199	ICNPGSSLC	893.385	6.31501	PTx	30	2.45786	0.027826	4.86845
PTxS2	191	199	ICNPGSSLC	893.385	6.33046	PTx-PS21C	0	0	0
PTxS2	191	199	ICNPGSSLC	893.385	6.28407	PTx-PS21C	10	2.43514	0.047821
PTxS2	191	199	ICNPGSSLC	893.385	6.30915	PTx-PS21C	30	2.49307	0.0889	4.92821	-0.059755	0.2667
PTxS3	1	12	VAPGIVIPPKAL	1174.76	6.17284	PTx	0	0	0
PTxS3	1	12	VAPGIVIPPKAL	1174.76	6.18119	PTx	10	2.7298	0.188799
PTxS3	1	12	VAPGIVIPPKAL	1174.76	6.16116	PTx	30	3.02294	0.189036	5.75273
PTxS3	1	12	VAPGIVIPPKAL	1174.76	6.17284	PTx-PS21C	0	0	0
PTxS3	1	12	VAPGIVIPPKAL	1174.76	6.13025	PTx-PS21C	10	2.46715	0.23756
PTxS3	1	12	VAPGIVIPPKAL	1174.76	6.15455	PTx-PS21C	30	2.86403	0.199909	5.33119	0.421547	0.71268
PTxS3	1	13	VAPGIVIPPKALF	1321.82	7.10475	PTx	0	0	0
PTxS3	1	13	VAPGIVIPPKALF	1321.82	7.11317	PTx	10	2.77423	0.050015
PTxS3	1	13	VAPGIVIPPKALF	1321.82	7.09016	PTx	30	3.12224	0.076088	5.89647
PTxS3	1	13	VAPGIVIPPKALF	1321.82	7.10475	PTx-PS21C	0	0	0
PTxS3	1	13	VAPGIVIPPKALF	1321.82	7.0648	PTx-PS21C	10	2.59066	0.098318
PTxS3	1	13	VAPGIVIPPKALF	1321.82	7.09238	PTx-PS21C	30	2.98879	0.033922	5.57945	0.317023	0.294954
PTxS3	3	12	PGIVIPPKAL	1004.65	6.17207	PTx	0	0	0
PTxS3	3	12	PGIVIPPKAL	1004.65	6.17793	PTx	10	2.45864	0.088471
PTxS3	3	12	PGIVIPPKAL	1004.65	6.15859	PTx	30	2.70081	0.065594	5.15945
PTxS3	3	12	PGIVIPPKAL	1004.65	6.17207	PTx-PS21C	0	0	0
PTxS3	3	12	PGIVIPPKAL	1004.65	6.12788	PTx-PS21C	10	2.24651	0.105056
PTxS3	3	12	PGIVIPPKAL	1004.65	6.15341	PTx-PS21C	30	2.59984	0.104812	4.84635	0.313096	0.315168
PTxS3	13	35	FTQQGGAYGRCPNGTRALTVAEL	2410.19	6.23375	PTx	0	0	0
PTxS3	13	35	FTQQGGAYGRCPNGTRALTVAEL	2410.19	6.24487	PTx	10	2.73408	0.281212
PTxS3	13	35	FTQQGGAYGRCPNGTRALTVAEL	2410.19	6.22353	PTx	30	3.08891	0.218507	5.82299
PTxS3	13	35	FTQQGGAYGRCPNGTRALTVAEL	2410.19	6.23375	PTx-PS21C	0	0	0
PTxS3	13	35	FTQQGGAYGRCPNGTRALTVAEL	2410.19	6.19549	PTx-PS21C	10	2.6761	0.330812
PTxS3	13	35	FTQQGGAYGRCPNGTRALTVAEL	2410.19	6.2278	PTx-PS21C	30	2.76891	0.174096	5.44501	0.377984	0.992436
PTxS3	29	35	ALTVAEL	716.419	7.10609	PTx	0	0	0
PTxS3	29	35	ALTVAEL	716.419	7.11957	PTx	10	0.070197	0.083388
PTxS3	29	35	ALTVAEL	716.419	7.09587	PTx	30	0.01716	0.067285	0.087357
PTxS3	29	35	ALTVAEL	716.419	7.10609	PTx-PS21C	0	0	0
PTxS3	29	35	ALTVAEL	716.419	7.06673	PTx-PS21C	10	0.089928	0.095332
PTxS3	29	35	ALTVAEL	716.419	7.09129	PTx-PS21C	30	0.013878	0.048552	0.103806	-0.016449	0.285996
PTxS3	35	43	LRGNAELQT	1001.54	4.73635	PTx	0	0	0
PTxS3	35	43	LRGNAELQT	1001.54	4.74609	PTx	10	2.96486	0.182516
PTxS3	35	43	LRGNAELQT	1001.54	4.71439	PTx	30	3.65991	0.125161	6.62476
PTxS3	35	43	LRGNAELQT	1001.54	4.73635	PTx-PS21C	0	0	0
PTxS3	35	43	LRGNAELQT	1001.54	4.70231	PTx-PS21C	10	2.77635	0.191354
PTxS3	35	43	LRGNAELQT	1001.54	4.72378	PTx-PS21C	30	3.5795	0.080334	6.35585	0.268915	0.574062
PTxS3	44	55	YLRQITPGWSIY	1496.79	7.36483	PTx	0	0	0
PTxS3	44	55	YLRQITPGWSIY	1496.79	7.37508	PTx	10	3.79463	0.087289
PTxS3	44	55	YLRQITPGWSIY	1496.79	7.35288	PTx	30	4.36757	0.0869	8.16219
PTxS3	44	55	YLRQITPGWSIY	1496.79	7.36483	PTx-PS21C	0	0	0
PTxS3	44	55	YLRQITPGWSIY	1496.79	7.32697	PTx-PS21C	10	3.16467	0.179076
PTxS3	44	55	YLRQITPGWSIY	1496.79	7.34959	PTx-PS21C	30	3.80887	0.147492	6.97354	1.18865	0.537228
PTxS3	44	57	YLRQITPGWSIYGL	1666.9	7.88611	PTx	0	0	0
PTxS3	44	57	YLRQITPGWSIYGL	1666.9	7.88339	PTx	10	3.67722	0.081674
PTxS3	44	57	YLRQITPGWSIYGL	1666.9	7.85819	PTx	30	4.17581	0.063775	7.85303
PTxS3	44	57	YLRQITPGWSIYGL	1666.9	7.88611	PTx-PS21C	0	0	0
PTxS3	44	57	YLRQITPGWSIYGL	1666.9	7.83469	PTx-PS21C	10	3.27636	0.183259
PTxS3	44	57	YLRQITPGWSIYGL	1666.9	7.8551	PTx-PS21C	30	3.84603	0.083872	7.12239	0.730643	0.549777
PTxS3	46	55	RQITPGWSIY	1220.64	7.02562	PTx	0	0	0
PTxS3	46	55	RQITPGWSIY	1220.64	7.03791	PTx	10	3.04662	0.076248
PTxS3	46	55	RQITPGWSIY	1220.64	7.0125	PTx	30	3.44138	0.013866	6.488
PTxS3	46	55	RQITPGWSIY	1220.64	7.02562	PTx-PS21C	0	0	0
PTxS3	46	55	RQITPGWSIY	1220.64	6.98526	PTx-PS21C	10	2.67712	0.194792
PTxS3	46	55	RQITPGWSIY	1220.64	7.01278	PTx-PS21C	30	3.11	0.103246	5.78712	0.700879	0.584376
PTxS3	46	57	RQITPGWSIYGL	1390.75	7.67174	PTx	0	0	0
PTxS3	46	57	RQITPGWSIYGL	1390.75	7.66644	PTx	10	2.84102	0.049353
PTxS3	46	57	RQITPGWSIYGL	1390.75	7.64454	PTx	30	3.17773	0.050916	6.01876
PTxS3	46	57	RQITPGWSIYGL	1390.75	7.67174	PTx-PS21C	0	0	0
PTxS3	46	57	RQITPGWSIYGL	1390.75	7.61696	PTx-PS21C	10	2.47878	0.071556
PTxS3	46	57	RQITPGWSIYGL	1390.75	7.63612	PTx-PS21C	30	2.91668	0.074521	5.39546	0.623297	0.223563
PTxS3	46	59	RQITPGWSIYGLYD	1668.84	7.70391	PTx	0	0	0
PTxS3	46	59	RQITPGWSIYGLYD	1668.84	7.70084	PTx	10	3.08863	0.113845
PTxS3	46	59	RQITPGWSIYGLYD	1668.84	7.67789	PTx	30	3.44727	0.130496	6.5359
PTxS3	46	59	RQITPGWSIYGLYD	1668.84	7.70391	PTx-PS21C	0	0	0
PTxS3	46	59	RQITPGWSIYGLYD	1668.84	7.64839	PTx-PS21C	10	2.6995	0.309898
PTxS3	46	59	RQITPGWSIYGLYD	1668.84	7.67263	PTx-PS21C	30	3.30126	0.104366	6.00077	0.535127	0.929694
PTxS3	46	61	RQITPGWSIYGLYDGT	1826.91	7.69398	PTx	0	0	0
PTxS3	46	61	RQITPGWSIYGLYDGT	1826.91	7.68495	PTx	10	3.28247	0.049538
PTxS3	46	61	RQITPGWSIYGLYDGT	1826.91	7.66359	PTx	30	3.68148	0.183815	6.96394
PTxS3	46	61	RQITPGWSIYGLYDGT	1826.91	7.69398	PTx-PS21C	0	0	0
PTxS3	46	61	RQITPGWSIYGLYDGT	1826.91	7.63549	PTx-PS21C	10	2.9972	0.128056
PTxS3	46	61	RQITPGWSIYGLYDGT	1826.91	7.65519	PTx-PS21C	30	3.3924	0.145147	6.3896	0.574342	0.551445
PTxS3	47	55	QITPGWSIY	1064.54	7.94407	PTx	0	0	0
PTxS3	47	55	QITPGWSIY	1064.54	7.94754	PTx	10	1.56184	0.254085
PTxS3	47	55	QITPGWSIY	1064.54	7.92248	PTx	30	1.80625	0.214462	3.3681
PTxS3	47	55	QITPGWSIY	1064.54	7.94407	PTx-PS21C	0	0	0
PTxS3	47	55	QITPGWSIY	1064.54	7.89756	PTx-PS21C	10	1.43751	0.194892
PTxS3	47	55	QITPGWSIY	1064.54	7.91992	PTx-PS21C	30	1.38756	0.202834	2.82507	0.543027	0.762255
PTxS3	47	63	QITPGWSIYGLYDGTYL	1946.95	5.92868	PTx	0	0	0
PTxS3	47	63	QITPGWSIYGLYDGTYL	1946.95	5.93916	PTx	10	3.89992	0.090444
PTxS3	47	63	QITPGWSIYGLYDGTYL	1946.95	5.91766	PTx	30	4.06858	0.043076	7.9685
PTxS3	47	63	QITPGWSIYGLYDGTYL	1946.95	5.92868	PTx-PS21C	0	0	0
PTxS3	47	63	QITPGWSIYGLYDGTYL	1946.95	5.88492	PTx-PS21C	10	3.94015	0.089761
PTxS3	47	63	QITPGWSIYGLYDGTYL	1946.95	5.91196	PTx-PS21C	30	4.12401	0.076777	8.06416	-0.09566	0.271332
PTxS3	48	55	ITPGWSIY	936.482	7.92154	PTx	0	0	0
PTxS3	48	55	ITPGWSIY	936.482	7.91874	PTx	10	2.14155	0.05217
PTxS3	48	55	ITPGWSIY	936.482	7.89424	PTx	30	2.25451	0.053499	4.39606
PTxS3	48	55	ITPGWSIY	936.482	7.92154	PTx-PS21C	0	0	0
PTxS3	48	55	ITPGWSIY	936.482	7.86935	PTx-PS21C	10	1.9786	0.126512
PTxS3	48	55	ITPGWSIY	936.482	7.89095	PTx-PS21C	30	2.2966	0.055798	4.2752	0.120855	0.379536
PTxS3	48	57	ITPGWSIYGL	1106.59	8.52414	PTx	0	0	0
PTxS3	48	57	ITPGWSIYGL	1106.59	8.52733	PTx	10	2.14268	0.040133
PTxS3	48	57	ITPGWSIYGL	1106.59	8.50288	PTx	30	2.23024	0.040041	4.37292
PTxS3	48	57	ITPGWSIYGL	1106.59	8.52414	PTx-PS21C	0	0	0
PTxS3	48	57	ITPGWSIYGL	1106.59	8.47944	PTx-PS21C	10	1.91532	0.025762
PTxS3	48	57	ITPGWSIYGL	1106.59	8.50762	PTx-PS21C	30	2.18443	0.059	4.09976	0.273164	0.177
PTxS3	58	67	YDGTYLGQAY	1150.51	7.05777	PTx	0	0	0
PTxS3	58	67	YDGTYLGQAY	1150.51	7.0673	PTx	10	1.82668	0.028113
PTxS3	58	67	YDGTYLGQAY	1150.51	7.04678	PTx	30	1.93635	0.03942	3.76302
PTxS3	58	67	YDGTYLGQAY	1150.51	7.05777	PTx-PS21C	0	0	0
PTxS3	58	67	YDGTYLGQAY	1150.51	7.01908	PTx-PS21C	10	1.50348	0.067485
PTxS3	58	67	YDGTYLGQAY	1150.51	7.04549	PTx-PS21C	30	1.70611	0.042177	3.20959	0.553436	0.202455
PTxS3	58	72	YDGTYLGQAYGGIIK	1618.81	6.88401	PTx	0	0	0
PTxS3	58	72	YDGTYLGQAYGGIIK	1618.81	6.88679	PTx	10	3.19738	0.03701
PTxS3	58	72	YDGTYLGQAYGGIIK	1618.81	6.86557	PTx	30	3.47264	0.102289	6.67002
PTxS3	58	72	YDGTYLGQAYGGIIK	1618.81	6.88401	PTx-PS21C	0	0	0
PTxS3	58	72	YDGTYLGQAYGGIIK	1618.81	6.83856	PTx-PS21C	10	2.70084	0.177301
PTxS3	58	72	YDGTYLGQAYGGIIK	1618.81	6.85701	PTx-PS21C	30	3.14684	0.068438	5.84768	0.822339	0.531903
PTxS3	59	67	DGTYLGQAY	987.442	6.96867	PTx	0	0	0
PTxS3	59	67	DGTYLGQAY	987.442	6.97538	PTx	10	1.94682	0.126822
PTxS3	59	67	DGTYLGQAY	987.442	6.95481	PTx	30	2.05043	0.02205	3.99725
PTxS3	59	67	DGTYLGQAY	987.442	6.96867	PTx-PS21C	0	0	0
PTxS3	59	67	DGTYLGQAY	987.442	6.92563	PTx-PS21C	10	1.43998	0.110628
PTxS3	59	67	DGTYLGQAY	987.442	6.94391	PTx-PS21C	30	1.80853	0.158373	3.24851	0.748739	0.475119
PTxS3	60	80	GTYLGQAYGGIIKDAPPGAGF	2053.04	7.26365	PTx	0	0	0
PTxS3	60	80	GTYLGQAYGGIIKDAPPGAGF	2053.04	7.26603	PTx	10	4.44353	0.146708
PTxS3	60	80	GTYLGQAYGGIIKDAPPGAGF	2053.04	7.24545	PTx	30	4.7012	0.122913	9.14473
PTxS3	60	80	GTYLGQAYGGIIKDAPPGAGF	2053.04	7.26365	PTx-PS21C	0	0	0
PTxS3	60	80	GTYLGQAYGGIIKDAPPGAGF	2053.04	7.22094	PTx-PS21C	10	3.78704	0.309229
PTxS3	60	80	GTYLGQAYGGIIKDAPPGAGF	2053.04	7.24231	PTx-PS21C	30	4.18307	0.13102	7.97011	1.17462	0.927687
PTxS3	62	72	YLGQAYGGIIK	1182.65	6.30661	PTx	0	0	0
PTxS3	62	72	YLGQAYGGIIK	1182.65	6.31505	PTx	10	3.10812	0.091224
PTxS3	62	72	YLGQAYGGIIK	1182.65	6.29239	PTx	30	3.47254	0.102067	6.58066
PTxS3	62	72	YLGQAYGGIIK	1182.65	6.30661	PTx-PS21C	0	0	0
PTxS3	62	72	YLGQAYGGIIK	1182.65	6.26346	PTx-PS21C	10	2.76665	0.220936
PTxS3	62	72	YLGQAYGGIIK	1182.65	6.28652	PTx-PS21C	30	3.33976	0.10862	6.10641	0.474249	0.662808
PTxS3	62	80	YLGQAYGGIIKDAPPGAGF	1894.97	7.06177	PTx	0	0	0
PTxS3	62	80	YLGQAYGGIIKDAPPGAGF	1894.97	7.07023	PTx	10	3.80956	0.04005
PTxS3	62	80	YLGQAYGGIIKDAPPGAGF	1894.97	7.04971	PTx	30	4.39095	0.089574	8.2005
PTxS3	62	80	YLGQAYGGIIKDAPPGAGF	1894.97	7.06177	PTx-PS21C	0	0	0
PTxS3	62	80	YLGQAYGGIIKDAPPGAGF	1894.97	7.02431	PTx-PS21C	10	3.33205	0.093053
PTxS3	62	80	YLGQAYGGIIKDAPPGAGF	1894.97	7.05376	PTx-PS21C	30	3.82893	0.062639	7.16098	1.03953	0.279159
PTxS3	63	69	LGQAYGG	665.325	5.34444	PTx	0	0	0
PTxS3	63	69	LGQAYGG	665.325	5.35508	PTx	10	1.0676	0.012633
PTxS3	63	69	LGQAYGG	665.325	5.33338	PTx	30	1.10114	0.021122	2.16873
PTxS3	63	69	LGQAYGG	665.325	5.34444	PTx-PS21C	0	0	0
PTxS3	63	69	LGQAYGG	665.325	5.30486	PTx-PS21C	10	1.06591	0.034274
PTxS3	63	69	LGQAYGG	665.325	5.32756	PTx-PS21C	30	1.10347	0.023561	2.16938	-0.000648	0.102822
PTxS3	63	80	LGQAYGGIIKDAPPGAGF	1731.91	6.72726	PTx	0	0	0
PTxS3	63	80	LGQAYGGIIKDAPPGAGF	1731.91	6.73842	PTx	10	3.29574	0.105458
PTxS3	63	80	LGQAYGGIIKDAPPGAGF	1731.91	6.71306	PTx	30	3.68188	0.034406	6.97762
PTxS3	63	80	LGQAYGGIIKDAPPGAGF	1731.91	6.72726	PTx-PS21C	0	0	0
PTxS3	63	80	LGQAYGGIIKDAPPGAGF	1731.91	6.68536	PTx-PS21C	10	2.8066	0.142318
PTxS3	63	80	LGQAYGGIIKDAPPGAGF	1731.91	6.70442	PTx-PS21C	30	3.24972	0.067323	6.05633	0.921297	0.426954
PTxS3	68	80	GGIIKDAPPGAGF	1199.64	6.14211	PTx	0	0	0
PTxS3	68	80	GGIIKDAPPGAGF	1199.64	6.1507	PTx	10	1.3067	0.046599
PTxS3	68	80	GGIIKDAPPGAGF	1199.64	6.13042	PTx	30	1.53383	0.110797	2.84053
PTxS3	68	80	GGIIKDAPPGAGF	1199.64	6.14211	PTx-PS21C	0	0	0
PTxS3	68	80	GGIIKDAPPGAGF	1199.64	6.09915	PTx-PS21C	10	1.12352	0.041419
PTxS3	68	80	GGIIKDAPPGAGF	1199.64	6.12293	PTx-PS21C	30	1.29628	0.042938	2.41981	0.420725	0.332391
PTxS3	74	80	APPGAGF	616.309	5.96921	PTx	0	0	0
PTxS3	74	80	APPGAGF	616.309	5.98128	PTx	10	0.181756	0.031696
PTxS3	74	80	APPGAGF	616.309	5.95873	PTx	30	0.244754	0.026721	0.42651
PTxS3	74	80	APPGAGF	616.309	5.96921	PTx-PS21C	0	0	0
PTxS3	74	80	APPGAGF	616.309	5.92793	PTx-PS21C	10	0.154783	0.027003
PTxS3	74	80	APPGAGF	616.309	5.95136	PTx-PS21C	30	0.192851	0.030735	0.347634	0.078876	0.095088
PTxS3	86	92	FCITTIY	860.422	7.89066	PTx	0	0	0
PTxS3	86	92	FCITTIY	860.422	7.88697	PTx	10	-0.022027	0.064854
PTxS3	86	92	FCITTIY	860.422	7.85982	PTx	30	0.087171	0.075657	0.065144
PTxS3	86	92	FCITTIY	860.422	7.89066	PTx-PS21C	0	0	0
PTxS3	86	92	FCITTIY	860.422	7.83673	PTx-PS21C	10	0.028072	0.057895
PTxS3	86	92	FCITTIY	860.422	8.04264	PTx-PS21C	30	0.39015	0.333582	0.418222	-0.353078	1.00075
PTxS3	103	111	YSKVTATRL	1038.59	4.69081	PTx	0	0	0
PTxS3	103	111	YSKVTATRL	1038.59	4.69506	PTx	10	0.576187	0.103214
PTxS3	103	111	YSKVTATRL	1038.59	4.65701	PTx	30	0.860105	0.09065	1.43629
PTxS3	103	111	YSKVTATRL	1038.59	4.69081	PTx-PS21C	0	0	0
PTxS3	103	111	YSKVTATRL	1038.59	4.65896	PTx-PS21C	10	0.430177	0.087765
PTxS3	103	111	YSKVTATRL	1038.59	4.67802	PTx-PS21C	30	0.795166	0.117427	1.22534	0.210949	0.352281
PTxS3	112	119	LASTNSRL	861.479	4.60225	PTx	0	0	0
PTxS3	112	119	LASTNSRL	861.479	4.6063	PTx	10	1.54683	0.12319
PTxS3	112	119	LASTNSRL	861.479	4.57557	PTx	30	1.57864	0.131318	3.12547
PTxS3	112	119	LASTNSRL	861.479	4.60225	PTx-PS21C	0	0	0
PTxS3	112	119	LASTNSRL	861.479	4.57731	PTx-PS21C	10	1.46959	0.166115
PTxS3	112	119	LASTNSRL	861.479	4.58851	PTx-PS21C	30	1.50104	0.142862	2.97063	0.154844	0.498345
PTxS3	139	146	EGRYRDMY	1089.48	6.9637	PTx	0	0	0
PTxS3	139	146	EGRYRDMY	1089.48	6.96071	PTx	10	-0.058513	0.014067
PTxS3	139	146	EGRYRDMY	1089.48	6.93866	PTx	30	0.190655	0.010775	0.132142
PTxS3	139	146	EGRYRDMY	1089.48	6.9637	PTx-PS21C	0	0	0
PTxS3	139	146	EGRYRDMY	1089.48	6.91063	PTx-PS21C	10	-0.033476	0.005936
PTxS3	139	146	EGRYRDMY	1089.48	6.93288	PTx-PS21C	30	0.241243	0.068089	0.207767	-0.075625	0.204267
PTxS3	162	175	AVRVHVSKEEQYYD	1722.84	4.93985	PTx	0	0	0
PTxS3	162	175	AVRVHVSKEEQYYD	1722.84	4.97008	PTx	10	0.980684	0.110957
PTxS3	162	175	AVRVHVSKEEQYYD	1722.84	4.94349	PTx	30	1.17029	0.159083	2.15097
PTxS3	162	175	AVRVHVSKEEQYYD	1722.84	4.93985	PTx-PS21C	0	0	0
PTxS3	162	175	AVRVHVSKEEQYYD	1722.84	4.90756	PTx-PS21C	10	0.833288	0.153472
PTxS3	162	175	AVRVHVSKEEQYYD	1722.84	4.94396	PTx-PS21C	30	0.970388	0.102971	1.80368	0.347296	0.477249
PTxS3	162	177	AVRVHVSKEEQYYDYE	2014.95	5.42917	PTx	0	0	0
PTxS3	162	177	AVRVHVSKEEQYYDYE	2014.95	5.44628	PTx	10	1.02574	0.094956
PTxS3	162	177	AVRVHVSKEEQYYDYE	2014.95	5.41863	PTx	30	1.15968	0.053956	2.18542
PTxS3	162	177	AVRVHVSKEEQYYDYE	2014.95	5.42917	PTx-PS21C	0	0	0
PTxS3	162	177	AVRVHVSKEEQYYDYE	2014.95	5.39125	PTx-PS21C	10	1.06511	0.151365
PTxS3	162	177	AVRVHVSKEEQYYDYE	2014.95	5.41556	PTx-PS21C	30	1.23732	0.145147	2.30243	-0.117013	0.454095
PTxS3	162	178	AVRVHVSKEEQYYDYED	2129.98	5.4317	PTx	0	0	0
PTxS3	162	178	AVRVHVSKEEQYYDYED	2129.98	5.44202	PTx	10	2.09637	0.084357
PTxS3	162	178	AVRVHVSKEEQYYDYED	2129.98	5.41655	PTx	30	2.21638	0.084005	4.31275
PTxS3	162	178	AVRVHVSKEEQYYDYED	2129.98	5.4317	PTx-PS21C	0	0	0
PTxS3	162	178	AVRVHVSKEEQYYDYED	2129.98	5.38882	PTx-PS21C	10	1.96145	0.094543
PTxS3	162	178	AVRVHVSKEEQYYDYED	2129.98	5.41738	PTx-PS21C	30	1.97861	0.264069	3.94006	0.372692	0.792207
PTxS3	162	180	AVRVHVSKEEQYYDYEDAT	2302.06	5.52934	PTx	0	0	0
PTxS3	162	180	AVRVHVSKEEQYYDYEDAT	2302.06	5.54162	PTx	10	1.66051	0.250163
PTxS3	162	180	AVRVHVSKEEQYYDYEDAT	2302.06	5.52073	PTx	30	1.76869	0.32089	3.4292
PTxS3	162	180	AVRVHVSKEEQYYDYEDAT	2302.06	5.52934	PTx-PS21C	0	0	0
PTxS3	162	180	AVRVHVSKEEQYYDYEDAT	2302.06	5.4911	PTx-PS21C	10	1.5393	0.215708
PTxS3	162	180	AVRVHVSKEEQYYDYEDAT	2302.06	5.51759	PTx-PS21C	30	1.77022	0.194665	3.30952	0.119675	0.96267
PTxS3	162	181	AVRVHVSKEEQYYDYEDATF	2449.13	6.18736	PTx	0	0	0
PTxS3	162	181	AVRVHVSKEEQYYDYEDATF	2449.13	6.19918	PTx	10	1.61739	0.193645
PTxS3	162	181	AVRVHVSKEEQYYDYEDATF	2449.13	6.17866	PTx	30	1.85682	0.251868	3.47422
PTxS3	162	181	AVRVHVSKEEQYYDYEDATF	2449.13	6.18736	PTx-PS21C	0	0	0
PTxS3	162	181	AVRVHVSKEEQYYDYEDATF	2449.13	6.14469	PTx-PS21C	10	1.41325	0.198357
PTxS3	162	181	AVRVHVSKEEQYYDYEDATF	2449.13	6.17722	PTx-PS21C	30	1.73109	0.1921	3.14434	0.329874	0.755604
PTxS3	163	177	VRVHVSKEEQYYDYE	1943.91	5.39778	PTx	0	0	0
PTxS3	163	177	VRVHVSKEEQYYDYE	1943.91	5.4146	PTx	10	0.73461	0.06226
PTxS3	163	177	VRVHVSKEEQYYDYE	1943.91	5.38738	PTx	30	0.818181	0.058057	1.55279
PTxS3	163	177	VRVHVSKEEQYYDYE	1943.91	5.39778	PTx-PS21C	0	0	0
PTxS3	163	177	VRVHVSKEEQYYDYE	1943.91	5.36046	PTx-PS21C	10	0.629311	0.066352
PTxS3	163	177	VRVHVSKEEQYYDYE	1943.91	5.38596	PTx-PS21C	30	0.655347	0.135533	1.28466	0.268133	0.406599
PTxS3	163	180	VRVHVSKEEQYYDYEDAT	2231.03	5.50426	PTx	0	0	0
PTxS3	163	180	VRVHVSKEEQYYDYEDAT	2231.03	5.51881	PTx	10	1.25834	0.14424
PTxS3	163	180	VRVHVSKEEQYYDYEDAT	2231.03	5.49468	PTx	30	1.37273	0.217367	2.63106
PTxS3	163	180	VRVHVSKEEQYYDYEDAT	2231.03	5.50426	PTx-PS21C	0	0	0
PTxS3	163	180	VRVHVSKEEQYYDYEDAT	2231.03	5.4666	PTx-PS21C	10	1.15926	0.182147
PTxS3	163	180	VRVHVSKEEQYYDYEDAT	2231.03	5.49317	PTx-PS21C	30	1.40161	0.186644	2.56088	0.070186	0.652101
PTxS3	164	175	RVHVSKEEQYYD	1552.74	4.64057	PTx	0	0	0
PTxS3	164	175	RVHVSKEEQYYD	1552.74	4.63957	PTx	10	0.668182	0.109059
PTxS3	164	175	RVHVSKEEQYYD	1552.74	4.60884	PTx	30	0.801603	0.155779	1.46978
PTxS3	164	175	RVHVSKEEQYYD	1552.74	4.64057	PTx-PS21C	0	0	0
PTxS3	164	175	RVHVSKEEQYYD	1552.74	4.60646	PTx-PS21C	10	0.555832	0.121595
PTxS3	164	175	RVHVSKEEQYYD	1552.74	4.62334	PTx-PS21C	30	0.654799	0.10928	1.21063	0.259154	0.467337
PTxS3	164	177	RVHVSKEEQYYDYE	1844.85	5.26666	PTx	0	0	0
PTxS3	164	177	RVHVSKEEQYYDYE	1844.85	5.28335	PTx	10	0.707617	0.041394
PTxS3	164	177	RVHVSKEEQYYDYE	1844.85	5.26063	PTx	30	0.821259	0.099665	1.52888
PTxS3	164	177	RVHVSKEEQYYDYE	1844.85	5.26666	PTx-PS21C	0	0	0
PTxS3	164	177	RVHVSKEEQYYDYE	1844.85	5.2319	PTx-PS21C	10	0.604797	0.060245
PTxS3	164	177	RVHVSKEEQYYDYE	1844.85	5.2559	PTx-PS21C	30	0.675048	0.058716	1.27984	0.249031	0.298995
PTxS3	164	181	RVHVSKEEQYYDYEDATF	2279.03	6.14489	PTx	0	0	0
PTxS3	164	181	RVHVSKEEQYYDYEDATF	2279.03	6.15449	PTx	10	1.29155	0.190577
PTxS3	164	181	RVHVSKEEQYYDYEDATF	2279.03	6.13525	PTx	30	1.45909	0.184685	2.75064
PTxS3	164	181	RVHVSKEEQYYDYEDATF	2279.03	6.14489	PTx-PS21C	0	0	0
PTxS3	164	181	RVHVSKEEQYYDYEDATF	2279.03	6.10146	PTx-PS21C	10	1.31075	0.104174
PTxS3	164	181	RVHVSKEEQYYDYEDATF	2279.03	6.13556	PTx-PS21C	30	1.34748	0.167806	2.65823	0.092407	0.571731
PTxS3	176	184	YEDATFQTY	1137.47	7.02669	PTx	0	0	0
PTxS3	176	184	YEDATFQTY	1137.47	7.03553	PTx	10	1.56583	0.1305
PTxS3	176	184	YEDATFQTY	1137.47	7.01209	PTx	30	1.64315	0.112278	3.20898
PTxS3	176	184	YEDATFQTY	1137.47	7.02669	PTx-PS21C	0	0	0
PTxS3	176	184	YEDATFQTY	1137.47	6.98501	PTx-PS21C	10	1.44064	0.091717
PTxS3	176	184	YEDATFQTY	1137.47	7.01287	PTx-PS21C	30	1.71304	0.120344	3.15367	0.055306	0.3915
PTxS3	179	186	ATFQTYAL	914.462	7.29461	PTx	0	0	0
PTxS3	179	186	ATFQTYAL	914.462	7.30559	PTx	10	0.724103	0.031566
PTxS3	179	186	ATFQTYAL	914.462	7.28378	PTx	30	0.774351	0.066156	1.49845
PTxS3	179	186	ATFQTYAL	914.462	7.29461	PTx-PS21C	0	0	0
PTxS3	179	186	ATFQTYAL	914.462	7.25479	PTx-PS21C	10	0.69743	0.039878
PTxS3	179	186	ATFQTYAL	914.462	7.28102	PTx-PS21C	30	0.714047	0.028031	1.41148	0.086977	0.198468
PTxS3	179	188	ATFQTYALTG	1072.53	6.96164	PTx	0	0	0
PTxS3	179	188	ATFQTYALTG	1072.53	6.9701	PTx	10	0.835685	0.061493
PTxS3	179	188	ATFQTYALTG	1072.53	6.94758	PTx	30	0.950813	0.074475	1.7865
PTxS3	179	188	ATFQTYALTG	1072.53	6.96164	PTx-PS21C	0	0	0
PTxS3	179	188	ATFQTYALTG	1072.53	6.9206	PTx-PS21C	10	0.747362	0.088372
PTxS3	179	188	ATFQTYALTG	1072.53	6.94409	PTx-PS21C	30	0.735924	0.115776	1.48329	0.303212	0.347328
PTxS3	182	188	QTYALTG	753.378	5.90718	PTx	0	0	0
PTxS3	182	188	QTYALTG	753.378	5.91932	PTx	10	0.144383	0.023439
PTxS3	182	188	QTYALTG	753.378	5.89666	PTx	30	0.128957	0.013886	0.27334
PTxS3	182	188	QTYALTG	753.378	5.90718	PTx-PS21C	0	0	0
PTxS3	182	188	QTYALTG	753.378	5.86706	PTx-PS21C	10	0.150717	0.020673
PTxS3	182	188	QTYALTG	753.378	5.89213	PTx-PS21C	30	0.125594	0.024909	0.276311	-0.002971	0.074727
PTxS3	184	190	YALTGIS	724.388	6.53016	PTx	0	0	0
PTxS3	184	190	YALTGIS	724.388	6.54532	PTx	10	0.242997	0.042194
PTxS3	184	190	YALTGIS	724.388	6.51938	PTx	30	0.172343	0.020399	0.41534
PTxS3	184	190	YALTGIS	724.388	6.53016	PTx-PS21C	0	0	0
PTxS3	184	190	YALTGIS	724.388	6.48734	PTx-PS21C	10	0.174344	0.049297
PTxS3	184	190	YALTGIS	724.388	6.51135	PTx-PS21C	30	0.118415	0.069295	0.292759	0.122581	0.207885
PTxS3	187	199	TGISLCNPAASIC	1249.59	7.64109	PTx	0	0	0
PTxS3	187	199	TGISLCNPAASIC	1249.59	7.63948	PTx	10	2.85044	0.15057
PTxS3	187	199	TGISLCNPAASIC	1249.59	7.61449	PTx	30	3.08282	0.078742	5.93326
PTxS3	187	199	TGISLCNPAASIC	1249.59	7.64109	PTx-PS21C	0	0	0
PTxS3	187	199	TGISLCNPAASIC	1249.59	7.59086	PTx-PS21C	10	2.9459	0.077263
PTxS3	187	199	TGISLCNPAASIC	1249.59	7.60895	PTx-PS21C	30	3.03365	0.181529	5.97954	-0.046283	0.544587
PTxS3	189	199	ISLCNPAASIC	1091.52	7.50725	PTx	0	0	0
PTxS3	189	199	ISLCNPAASIC	1091.52	7.50722	PTx	10	3.42789	0.066428
PTxS3	189	199	ISLCNPAASIC	1091.52	7.48444	PTx	30	3.60874	0.053818	7.03664
PTxS3	189	199	ISLCNPAASIC	1091.52	7.50725	PTx-PS21C	0	0	0
PTxS3	189	199	ISLCNPAASIC	1091.52	7.45877	PTx-PS21C	10	3.35668	0.081824
PTxS3	189	199	ISLCNPAASIC	1091.52	7.47886	PTx-PS21C	30	3.72428	0.212489	7.08096	-0.044326	0.637467
PTxS3	192	199	CNPAASIC	778.322	6.16757	PTx	0	0	0
PTxS3	192	199	CNPAASIC	778.322	6.16964	PTx	10	2.46979	0.049334
PTxS3	192	199	CNPAASIC	778.322	6.15118	PTx	30	2.65584	0.066698	5.12563
PTxS3	192	199	CNPAASIC	778.322	6.16757	PTx-PS21C	0	0	0
PTxS3	192	199	CNPAASIC	778.322	6.11783	PTx-PS21C	10	2.52209	0.056128
PTxS3	192	199	CNPAASIC	778.322	6.14258	PTx-PS21C	30	2.70367	0.069311	5.22577	-0.100136	0.207933
PTxS4	1	8	DVPYVLVK	932.545	6.19949	PTx	0	0	0
PTxS4	1	8	DVPYVLVK	932.545	6.2064	PTx	10	0.167769	0.0535
PTxS4	1	8	DVPYVLVK	932.545	6.18624	PTx	30	0.212772	0.032793	0.380541
PTxS4	1	8	DVPYVLVK	932.545	6.19949	PTx-PS21C	0	0	0
PTxS4	1	8	DVPYVLVK	932.545	6.15799	PTx-PS21C	10	0.150647	0.036515
PTxS4	1	8	DVPYVLVK	932.545	6.18251	PTx-PS21C	30	0.203058	0.033266	0.353705	0.026836	0.1605
PTxS4	11	27	MVVTSVAMKPYEVTPTR	1908.99	5.92819	PTx	0	0	0
PTxS4	11	27	MVVTSVAMKPYEVTPTR	1908.99	5.85131	PTx	10	3.67329	0.04966
PTxS4	11	27	MVVTSVAMKPYEVTPTR	1908.99	5.83214	PTx	30	3.98937	0.094031	7.66266
PTxS4	11	27	MVVTSVAMKPYEVTPTR	1908.99	5.92819	PTx-PS21C	0	0	0
PTxS4	11	27	MVVTSVAMKPYEVTPTR	1908.99	5.79977	PTx-PS21C	10	3.7253	0.160479
PTxS4	11	27	MVVTSVAMKPYEVTPTR	1908.99	5.82499	PTx-PS21C	30	3.98789	0.085141	7.71318	-0.050523	0.481437
PTxS4	11	28	MVVTSVAMKPYEVTPTRM	2040.03	6.23695	PTx	0	0	0
PTxS4	11	28	MVVTSVAMKPYEVTPTRM	2040.03	6.24555	PTx	10	4.13377	0.097867
PTxS4	11	28	MVVTSVAMKPYEVTPTRM	2040.03	6.22469	PTx	30	4.31344	0.113083	8.44721
PTxS4	11	28	MVVTSVAMKPYEVTPTRM	2040.03	6.23695	PTx-PS21C	0	0	0
PTxS4	11	28	MVVTSVAMKPYEVTPTRM	2040.03	6.19441	PTx-PS21C	10	4.08562	0.109419
PTxS4	11	28	MVVTSVAMKPYEVTPTRM	2040.03	6.22021	PTx-PS21C	30	4.29653	0.111964	8.38216	0.06505	0.339249
PTxS4	11	29	MVVTSVAMKPYEVTPTRML	2153.12	6.64569	PTx	0	0	0
PTxS4	11	29	MVVTSVAMKPYEVTPTRML	2153.12	6.65862	PTx	10	4.17777	0.112934
PTxS4	11	29	MVVTSVAMKPYEVTPTRML	2153.12	6.63216	PTx	30	4.34671	0.115432	8.52448
PTxS4	11	29	MVVTSVAMKPYEVTPTRML	2153.12	6.64569	PTx-PS21C	0	0	0
PTxS4	11	29	MVVTSVAMKPYEVTPTRML	2153.12	6.59883	PTx-PS21C	10	4.15454	0.104013
PTxS4	11	29	MVVTSVAMKPYEVTPTRML	2153.12	6.62346	PTx-PS21C	30	4.44428	0.135847	8.59881	-0.074337	0.407541
PTxS4	12	18	VVTSVAM	706.38	5.92561	PTx	0	0	0
PTxS4	12	18	VVTSVAM	706.38	5.93947	PTx	10	0.279476	0.036493
PTxS4	12	18	VVTSVAM	706.38	5.91667	PTx	30	0.221897	0.026474	0.501373
PTxS4	12	18	VVTSVAM	706.38	5.92561	PTx-PS21C	0	0	0
PTxS4	12	18	VVTSVAM	706.38	5.88589	PTx-PS21C	10	0.217399	0.03413
PTxS4	12	18	VVTSVAM	706.38	5.91119	PTx-PS21C	30	0.187969	0.019301	0.405368	0.096005	0.109479
PTxS4	12	28	VVTSVAMKPYEVTPTRM	1908.99	5.92763	PTx	0	0	0
PTxS4	12	28	VVTSVAMKPYEVTPTRM	1908.99	5.9381	PTx	10	3.71072	0.023522
PTxS4	12	28	VVTSVAMKPYEVTPTRM	1908.99	5.91627	PTx	30	3.77746	0.026184	7.48818
PTxS4	12	28	VVTSVAMKPYEVTPTRM	1908.99	5.92763	PTx-PS21C	0	0	0
PTxS4	12	28	VVTSVAMKPYEVTPTRM	1908.99	5.88603	PTx-PS21C	10	3.61656	0.059851
PTxS4	12	28	VVTSVAMKPYEVTPTRM	1908.99	5.91239	PTx-PS21C	30	3.79281	0.064941	7.40938	0.078806	0.194823
PTxS4	12	29	VVTSVAMKPYEVTPTRML	2022.08	6.38835	PTx	0	0	0
PTxS4	12	29	VVTSVAMKPYEVTPTRML	2022.08	6.40106	PTx	10	4.15173	0.124015
PTxS4	12	29	VVTSVAMKPYEVTPTRML	2022.08	6.37349	PTx	30	4.27493	0.103948	8.42666
PTxS4	12	29	VVTSVAMKPYEVTPTRML	2022.08	6.38835	PTx-PS21C	0	0	0
PTxS4	12	29	VVTSVAMKPYEVTPTRML	2022.08	6.3435	PTx-PS21C	10	4.08689	0.114524
PTxS4	12	29	VVTSVAMKPYEVTPTRML	2022.08	6.36951	PTx-PS21C	30	4.25585	0.13678	8.34275	0.083918	0.41034
PTxS4	14	28	TSVAMKPYEVTPTRM	1710.86	5.92753	PTx	0	0	0
PTxS4	14	28	TSVAMKPYEVTPTRM	1710.86	5.93767	PTx	10	2.83242	0.074806
PTxS4	14	28	TSVAMKPYEVTPTRM	1710.86	5.91584	PTx	30	2.96592	0.18458	5.79834
PTxS4	14	28	TSVAMKPYEVTPTRM	1710.86	5.92753	PTx-PS21C	0	0	0
PTxS4	14	28	TSVAMKPYEVTPTRM	1710.86	5.88596	PTx-PS21C	10	2.84605	0.051605
PTxS4	14	28	TSVAMKPYEVTPTRM	1710.86	5.91248	PTx-PS21C	30	2.88537	0.063526	5.73142	0.066923	0.55374
PTxS4	16	28	VAMKPYEVTPTRM	1522.78	5.55912	PTx	0	0	0
PTxS4	16	28	VAMKPYEVTPTRM	1522.78	5.57034	PTx	10	3.45118	0.144337
PTxS4	16	28	VAMKPYEVTPTRM	1522.78	5.54786	PTx	30	3.61375	0.124889	7.06492
PTxS4	16	28	VAMKPYEVTPTRM	1522.78	5.55912	PTx-PS21C	0	0	0
PTxS4	16	28	VAMKPYEVTPTRM	1522.78	5.51959	PTx-PS21C	10	3.49752	0.128829
PTxS4	16	28	VAMKPYEVTPTRM	1522.78	5.54356	PTx-PS21C	30	3.69188	0.136883	7.1894	-0.12448	0.433011
PTxS4	16	29	VAMKPYEVTPTRML	1635.86	6.11097	PTx	0	0	0
PTxS4	16	29	VAMKPYEVTPTRML	1635.86	6.11793	PTx	10	3.57505	0.06183
PTxS4	16	29	VAMKPYEVTPTRML	1635.86	6.09661	PTx	30	3.69096	0.0564	7.26601
PTxS4	16	29	VAMKPYEVTPTRML	1635.86	6.11097	PTx-PS21C	0	0	0
PTxS4	16	29	VAMKPYEVTPTRML	1635.86	6.06629	PTx-PS21C	10	3.53456	0.026698
PTxS4	16	29	VAMKPYEVTPTRML	1635.86	6.10802	PTx-PS21C	30	3.84531	0.169939	7.37987	-0.113864	0.509817
PTxS4	17	28	AMKPYEVTPTRM	1423.71	5.41277	PTx	0	0	0
PTxS4	17	28	AMKPYEVTPTRM	1423.71	5.42816	PTx	10	3.25361	0.12908
PTxS4	17	28	AMKPYEVTPTRM	1423.71	5.40005	PTx	30	3.45238	0.15834	6.70599
PTxS4	17	28	AMKPYEVTPTRM	1423.71	5.41277	PTx-PS21C	0	0	0
PTxS4	17	28	AMKPYEVTPTRM	1423.71	5.37327	PTx-PS21C	10	3.28361	0.04978
PTxS4	17	28	AMKPYEVTPTRM	1423.71	5.3969	PTx-PS21C	30	3.55775	0.187131	6.84136	-0.135371	0.561393
PTxS4	18	28	MKPYEVTPTRM	1352.67	5.36737	PTx	0	0	0
PTxS4	18	28	MKPYEVTPTRM	1352.67	5.38059	PTx	10	2.9132	0.207775
PTxS4	18	28	MKPYEVTPTRM	1352.67	5.35419	PTx	30	3.11666	0.199556	6.02986
PTxS4	18	28	MKPYEVTPTRM	1352.67	5.36737	PTx-PS21C	0	0	0
PTxS4	18	28	MKPYEVTPTRM	1352.67	5.3273	PTx-PS21C	10	2.90763	0.201902
PTxS4	18	28	MKPYEVTPTRM	1352.67	5.35049	PTx-PS21C	30	3.12678	0.227118	6.0344	-0.004542	0.681354
PTxS4	18	29	MKPYEVTPTRML	1465.75	5.97492	PTx	0	0	0
PTxS4	18	29	MKPYEVTPTRML	1465.75	5.98401	PTx	10	2.97647	0.040038
PTxS4	18	29	MKPYEVTPTRML	1465.75	5.96293	PTx	30	3.06763	0.106786	6.0441
PTxS4	18	29	MKPYEVTPTRML	1465.75	5.97492	PTx-PS21C	0	0	0
PTxS4	18	29	MKPYEVTPTRML	1465.75	5.92912	PTx-PS21C	10	2.92864	0.086463
PTxS4	18	29	MKPYEVTPTRML	1465.75	5.95301	PTx-PS21C	30	3.20576	0.27146	6.1344	-0.090303	0.81438
PTxS4	20	29	PYEVTPTRML	1206.62	5.84404	PTx	0	0	0
PTxS4	20	29	PYEVTPTRML	1206.62	5.86223	PTx	10	0.224456	0.061087
PTxS4	20	29	PYEVTPTRML	1206.62	5.83421	PTx	30	0.24738	0.07039	0.471836
PTxS4	20	29	PYEVTPTRML	1206.62	5.84404	PTx-PS21C	0	0	0
PTxS4	20	29	PYEVTPTRML	1206.62	5.80432	PTx-PS21C	10	0.1347	0.050562
PTxS4	20	29	PYEVTPTRML	1206.62	5.83138	PTx-PS21C	30	0.054406	0.050945	0.189106	0.28273	0.21117
PTxS4	21	28	YEVTPTRM	996.482	5.40429	PTx	0	0	0
PTxS4	21	28	YEVTPTRM	996.482	5.41825	PTx	10	2.64465	0.056629
PTxS4	21	28	YEVTPTRM	996.482	5.39063	PTx	30	2.8499	0.06148	5.49455
PTxS4	21	28	YEVTPTRM	996.482	5.40429	PTx-PS21C	0	0	0
PTxS4	21	28	YEVTPTRM	996.482	5.36529	PTx-PS21C	10	2.75616	0.080878
PTxS4	21	28	YEVTPTRM	996.482	5.39832	PTx-PS21C	30	2.93295	0.059591	5.68911	-0.194559	0.242634
PTxS4	22	28	EVTPTRM	833.419	4.71056	PTx	0	0	0
PTxS4	22	28	EVTPTRM	833.419	4.71913	PTx	10	2.17666	0.040644
PTxS4	22	28	EVTPTRM	833.419	4.69117	PTx	30	2.28361	0.056659	4.46027
PTxS4	22	28	EVTPTRM	833.419	4.71056	PTx-PS21C	0	0	0
PTxS4	22	28	EVTPTRM	833.419	4.67673	PTx-PS21C	10	2.12028	0.054075
PTxS4	22	28	EVTPTRM	833.419	4.6961	PTx-PS21C	30	2.28158	0.059818	4.40187	0.058408	0.179454
PTxS4	22	29	EVTPTRML	946.503	5.711	PTx	0	0	0
PTxS4	22	29	EVTPTRML	946.503	5.72374	PTx	10	2.09869	0.053806
PTxS4	22	29	EVTPTRML	946.503	5.70062	PTx	30	2.18133	0.039605	4.28002
PTxS4	22	29	EVTPTRML	946.503	5.711	PTx-PS21C	0	0	0
PTxS4	22	29	EVTPTRML	946.503	5.66999	PTx-PS21C	10	2.10382	0.043521
PTxS4	22	29	EVTPTRML	946.503	5.84793	PTx-PS21C	30	2.38922	0.088308	4.49304	-0.213021	0.264924
PTxS4	32	51	GIAAKLGAAASSPDAHVPFC	1882.95	6.53424	PTx	0	0	0
PTxS4	32	51	GIAAKLGAAASSPDAHVPFC	1882.95	6.54665	PTx	10	3.84278	0.113985
PTxS4	32	51	GIAAKLGAAASSPDAHVPFC	1882.95	6.51725	PTx	30	4.19447	0.138626	8.03725
PTxS4	32	51	GIAAKLGAAASSPDAHVPFC	1882.95	6.53424	PTx-PS21C	0	0	0
PTxS4	32	51	GIAAKLGAAASSPDAHVPFC	1882.95	6.48452	PTx-PS21C	10	3.88503	0.156747
PTxS4	32	51	GIAAKLGAAASSPDAHVPFC	1882.95	6.50974	PTx-PS21C	30	4.4649	0.140817	8.34994	-0.312682	0.470241
PTxS4	35	51	AKLGAAASSPDAHVPFC	1641.81	5.98541	PTx	0	0	0
PTxS4	35	51	AKLGAAASSPDAHVPFC	1641.81	5.9974	PTx	10	3.01438	0.110187
PTxS4	35	51	AKLGAAASSPDAHVPFC	1641.81	5.97311	PTx	30	3.0413	0.049691	6.05569
PTxS4	35	51	AKLGAAASSPDAHVPFC	1641.81	5.98541	PTx-PS21C	0	0	0
PTxS4	35	51	AKLGAAASSPDAHVPFC	1641.81	5.94384	PTx-PS21C	10	3.19345	0.115153
PTxS4	35	51	AKLGAAASSPDAHVPFC	1641.81	5.96565	PTx-PS21C	30	3.36793	0.094219	6.56138	-0.505691	0.345459
PTxS4	35	52	AKLGAAASSPDAHVPFCF	1788.87	6.85024	PTx	0	0	0
PTxS4	35	52	AKLGAAASSPDAHVPFCF	1788.87	6.8628	PTx	10	3.00897	0.138054
PTxS4	35	52	AKLGAAASSPDAHVPFCF	1788.87	6.83727	PTx	30	3.06086	0.199084	6.06982
PTxS4	35	52	AKLGAAASSPDAHVPFCF	1788.87	6.85024	PTx-PS21C	0	0	0
PTxS4	35	52	AKLGAAASSPDAHVPFCF	1788.87	6.8086	PTx-PS21C	10	3.04341	0.165253
PTxS4	35	52	AKLGAAASSPDAHVPFCF	1788.87	6.83282	PTx-PS21C	30	3.09906	0.221332	6.14247	-0.07265	0.663996
PTxS4	35	54	AKLGAAASSPDAHVPFCFGK	1973.99	5.91676	PTx	0	0	0
PTxS4	35	54	AKLGAAASSPDAHVPFCFGK	1973.99	5.92783	PTx	10	3.70388	0.060984
PTxS4	35	54	AKLGAAASSPDAHVPFCFGK	1973.99	5.90668	PTx	30	3.81136	0.35541	7.51524
PTxS4	35	54	AKLGAAASSPDAHVPFCFGK	1973.99	5.91676	PTx-PS21C	0	0	0
PTxS4	35	54	AKLGAAASSPDAHVPFCFGK	1973.99	5.87545	PTx-PS21C	10	3.74681	0.309298
PTxS4	35	54	AKLGAAASSPDAHVPFCFGK	1973.99	5.90332	PTx-PS21C	30	4.3718	0.189248	8.11861	-0.60337	1.06623
PTxS4	35	55	AKLGAAASSPDAHVPFCFGKD	2089.02	5.97565	PTx	0	0	0
PTxS4	35	55	AKLGAAASSPDAHVPFCFGKD	2089.02	5.98817	PTx	10	3.35982	0.17406
PTxS4	35	55	AKLGAAASSPDAHVPFCFGKD	2089.02	5.96575	PTx	30	3.70831	0.239315	7.06813
PTxS4	35	55	AKLGAAASSPDAHVPFCFGKD	2089.02	5.97565	PTx-PS21C	0	0	0
PTxS4	35	55	AKLGAAASSPDAHVPFCFGKD	2089.02	5.9338	PTx-PS21C	10	3.59987	0.216223
PTxS4	35	55	AKLGAAASSPDAHVPFCFGKD	2089.02	5.95708	PTx-PS21C	30	4.21797	0.284103	7.81784	-0.749709	0.852309
PTxS4	36	52	KLGAAASSPDAHVPFCF	1717.84	6.84316	PTx	0	0	0
PTxS4	36	52	KLGAAASSPDAHVPFCF	1717.84	6.85938	PTx	10	2.5723	0.095636
PTxS4	36	52	KLGAAASSPDAHVPFCF	1717.84	6.83274	PTx	30	2.59363	0.057731	5.16592
PTxS4	36	52	KLGAAASSPDAHVPFCF	1717.84	6.84316	PTx-PS21C	0	0	0
PTxS4	36	52	KLGAAASSPDAHVPFCF	1717.84	6.80136	PTx-PS21C	10	2.6006	0.117807
PTxS4	36	52	KLGAAASSPDAHVPFCF	1717.84	6.82598	PTx-PS21C	30	2.61401	0.21955	5.21461	-0.048686	0.65865
PTxS4	41	52	ASSPDAHVPFCF	1277.56	7.39778	PTx	0	0	0
PTxS4	41	52	ASSPDAHVPFCF	1277.56	7.41107	PTx	10	0.829264	0.146285
PTxS4	41	52	ASSPDAHVPFCF	1277.56	7.38678	PTx	30	0.974956	0.10279	1.80422
PTxS4	41	52	ASSPDAHVPFCF	1277.56	7.39778	PTx-PS21C	0	0	0
PTxS4	41	52	ASSPDAHVPFCF	1277.56	7.36067	PTx-PS21C	10	0.881749	0.067852
PTxS4	41	52	ASSPDAHVPFCF	1277.56	7.38369	PTx-PS21C	30	0.842097	0.062158	1.72385	0.080374	0.438855
PTxS4	41	54	ASSPDAHVPFCFGK	1462.68	6.12747	PTx	0	0	0
PTxS4	41	54	ASSPDAHVPFCFGK	1462.68	6.13728	PTx	10	1.43261	0.093078
PTxS4	41	54	ASSPDAHVPFCFGK	1462.68	6.11708	PTx	30	1.53318	0.05477	2.96579
PTxS4	41	54	ASSPDAHVPFCFGK	1462.68	6.12747	PTx-PS21C	0	0	0
PTxS4	41	54	ASSPDAHVPFCFGK	1462.68	6.08439	PTx-PS21C	10	1.41056	0.105676
PTxS4	41	54	ASSPDAHVPFCFGK	1462.68	6.11628	PTx-PS21C	30	1.48876	0.167655	2.89932	0.066476	0.502965
PTxS4	52	65	FGKDLKRPGSSPME	1548.78	4.77723	PTx	0	0	0
PTxS4	52	65	FGKDLKRPGSSPME	1548.78	4.78089	PTx	10	2.92	0.044282
PTxS4	52	65	FGKDLKRPGSSPME	1548.78	4.74853	PTx	30	3.05843	0.073883	5.97843
PTxS4	52	65	FGKDLKRPGSSPME	1548.78	4.77723	PTx-PS21C	0	0	0
PTxS4	52	65	FGKDLKRPGSSPME	1548.78	4.73766	PTx-PS21C	10	3.13232	0.151921
PTxS4	52	65	FGKDLKRPGSSPME	1548.78	4.7611	PTx-PS21C	30	3.18946	0.06446	6.32179	-0.343355	0.455763
PTxS4	55	64	DLKRPGSSPM	1087.56	4.70846	PTx	0	0	0
PTxS4	55	64	DLKRPGSSPM	1087.56	4.71036	PTx	10	2.39954	0.136266
PTxS4	55	64	DLKRPGSSPM	1087.56	4.68698	PTx	30	2.66739	0.110816	5.06693
PTxS4	55	64	DLKRPGSSPM	1087.56	4.70846	PTx-PS21C	0	0	0
PTxS4	55	64	DLKRPGSSPM	1087.56	4.66892	PTx-PS21C	10	2.49018	0.089909
PTxS4	55	64	DLKRPGSSPM	1087.56	4.68564	PTx-PS21C	30	2.64865	0.093076	5.13883	-0.071899	0.408798
PTxS4	55	65	DLKRPGSSPME	1216.6	4.76508	PTx	0	0	0
PTxS4	55	65	DLKRPGSSPME	1216.6	4.77525	PTx	10	2.00427	0.14995
PTxS4	55	65	DLKRPGSSPME	1216.6	4.74945	PTx	30	2.04358	0.125568	4.04784
PTxS4	55	65	DLKRPGSSPME	1216.6	4.76508	PTx-PS21C	0	0	0
PTxS4	55	65	DLKRPGSSPME	1216.6	4.72927	PTx-PS21C	10	2.29168	0.136875
PTxS4	55	65	DLKRPGSSPME	1216.6	4.74914	PTx-PS21C	30	2.23511	0.145561	4.52679	-0.478954	0.44985
PTxS4	55	67	DLKRPGSSPMEVM	1446.71	5.8103	PTx	0	0	0
PTxS4	55	67	DLKRPGSSPMEVM	1446.71	5.81982	PTx	10	2.0931	0.123691
PTxS4	55	67	DLKRPGSSPMEVM	1446.71	5.7981	PTx	30	2.15202	0.01687	4.24512
PTxS4	55	67	DLKRPGSSPMEVM	1446.71	5.8103	PTx-PS21C	0	0	0
PTxS4	55	67	DLKRPGSSPMEVM	1446.71	5.76883	PTx-PS21C	10	2.17881	0.020522
PTxS4	55	67	DLKRPGSSPMEVM	1446.71	5.79314	PTx-PS21C	30	2.26087	0.034937	4.43968	-0.194558	0.371073
PTxS4	56	65	LKRPGSSPME	1101.57	4.29339	PTx	0	0	0
PTxS4	56	65	LKRPGSSPME	1101.57	4.28548	PTx	10	1.88772	0.179312
PTxS4	56	65	LKRPGSSPME	1101.57	4.26112	PTx	30	1.84562	0.175838	3.73333
PTxS4	56	65	LKRPGSSPME	1101.57	4.29339	PTx-PS21C	0	0	0
PTxS4	56	65	LKRPGSSPME	1101.57	4.26494	PTx-PS21C	10	1.92829	0.17911
PTxS4	56	65	LKRPGSSPME	1101.57	4.26018	PTx-PS21C	30	1.94425	0.181045	3.87253	-0.139196	0.543135
PTxS4	56	67	LKRPGSSPMEVM	1331.68	5.40961	PTx	0	0	0
PTxS4	56	67	LKRPGSSPMEVM	1331.68	5.42675	PTx	10	1.52273	0.019429
PTxS4	56	67	LKRPGSSPMEVM	1331.68	5.39795	PTx	30	1.56002	0.043994	3.08275
PTxS4	56	67	LKRPGSSPMEVM	1331.68	5.40961	PTx-PS21C	0	0	0
PTxS4	56	67	LKRPGSSPMEVM	1331.68	5.37046	PTx-PS21C	10	1.66573	0.093695
PTxS4	56	67	LKRPGSSPMEVM	1331.68	5.39511	PTx-PS21C	30	1.65266	0.034219	3.31839	-0.235645	0.281085
PTxS4	73	80	MQQRPLRM	1059.56	4.73184	PTx	0	0	0
PTxS4	73	80	MQQRPLRM	1059.56	4.73754	PTx	10	0.309294	0.015157
PTxS4	73	80	MQQRPLRM	1059.56	4.70003	PTx	30	0.262051	0.019298	0.571345
PTxS4	73	80	MQQRPLRM	1059.56	4.73184	PTx-PS21C	0	0	0
PTxS4	73	80	MQQRPLRM	1059.56	4.70091	PTx-PS21C	10	0.23503	0.045107
PTxS4	73	80	MQQRPLRM	1059.56	4.71775	PTx-PS21C	30	0.181731	0.033183	0.416761	0.154584	0.135321
PTxS4	73	87	MQQRPLRMFLGPKQL	1843.02	6.15854	PTx	0	0	0
PTxS4	73	87	MQQRPLRMFLGPKQL	1843.02	6.17149	PTx	10	1.169	0.158923
PTxS4	73	87	MQQRPLRMFLGPKQL	1843.02	6.15173	PTx	30	1.3005	0.142844	2.4695
PTxS4	73	87	MQQRPLRMFLGPKQL	1843.02	6.15854	PTx-PS21C	0	0	0
PTxS4	73	87	MQQRPLRMFLGPKQL	1843.02	6.11831	PTx-PS21C	10	0.894731	0.111016
PTxS4	73	87	MQQRPLRMFLGPKQL	1843.02	6.14601	PTx-PS21C	30	1.09225	0.155499	1.98698	0.482517	0.476769
PTxS4	73	96	MQQRPLRMFLGPKQLTFEGKPALE	2815.51	6.45235	PTx	0	0	0
PTxS4	73	96	MQQRPLRMFLGPKQLTFEGKPALE	2815.51	6.46922	PTx	10	3.70891	0.33611
PTxS4	73	96	MQQRPLRMFLGPKQLTFEGKPALE	2815.51	6.44127	PTx	30	4.20558	0.334964	7.91449
PTxS4	73	96	MQQRPLRMFLGPKQLTFEGKPALE	2815.51	6.45235	PTx-PS21C	0	0	0
PTxS4	73	96	MQQRPLRMFLGPKQLTFEGKPALE	2815.51	6.41036	PTx-PS21C	10	3.39509	0.174183
PTxS4	73	96	MQQRPLRMFLGPKQLTFEGKPALE	2815.51	6.43909	PTx-PS21C	30	3.88342	0.2553	7.27851	0.635981	1.00833
PTxS4	73	97	MQQRPLRMFLGPKQLTFEGKPALEL	2928.59	6.87413	PTx	0	0	0
PTxS4	73	97	MQQRPLRMFLGPKQLTFEGKPALEL	2928.59	6.88401	PTx	10	3.61225	0.244556
PTxS4	73	97	MQQRPLRMFLGPKQLTFEGKPALEL	2928.59	6.85884	PTx	30	4.00354	0.239132	7.61578
PTxS4	73	97	MQQRPLRMFLGPKQLTFEGKPALEL	2928.59	6.87413	PTx-PS21C	0	0	0
PTxS4	73	97	MQQRPLRMFLGPKQLTFEGKPALEL	2928.59	6.83013	PTx-PS21C	10	3.28379	0.141279
PTxS4	73	97	MQQRPLRMFLGPKQLTFEGKPALEL	2928.59	6.86043	PTx-PS21C	30	3.65532	0.166273	6.93911	0.676667	0.733668
PTxS4	74	80	QQRPLRM	928.514	4.49475	PTx	0	0	0
PTxS4	74	80	QQRPLRM	928.514	4.32589	PTx	10	0.207984	0.09874
PTxS4	74	80	QQRPLRM	928.514	4.29513	PTx	30	0.158404	0.112463	0.366388
PTxS4	74	80	QQRPLRM	928.514	4.49475	PTx-PS21C	0	0	0
PTxS4	74	80	QQRPLRM	928.514	4.32431	PTx-PS21C	10	0.144638	0.145135
PTxS4	74	80	QQRPLRM	928.514	4.30851	PTx-PS21C	30	0.05282	0.101711	0.197458	0.16893	0.435405
PTxS4	79	87	RMFLGPKQL	1089.62	5.799	PTx	0	0	0
PTxS4	79	87	RMFLGPKQL	1089.62	5.81539	PTx	10	1.00216	0.119973
PTxS4	79	87	RMFLGPKQL	1089.62	5.78731	PTx	30	1.12039	0.083169	2.12255
PTxS4	79	87	RMFLGPKQL	1089.62	5.799	PTx-PS21C	0	0	0
PTxS4	79	87	RMFLGPKQL	1089.62	5.75897	PTx-PS21C	10	0.772529	0.04999
PTxS4	79	87	RMFLGPKQL	1089.62	5.78094	PTx-PS21C	30	1.14137	0.137332	1.9139	0.208655	0.411996
PTxS4	80	87	MFLGPKQL	933.523	6.43918	PTx	0	0	0
PTxS4	80	87	MFLGPKQL	933.523	6.45526	PTx	10	0.938926	0.062162
PTxS4	80	87	MFLGPKQL	933.523	6.42822	PTx	30	1.138	0.06084	2.07693
PTxS4	80	87	MFLGPKQL	933.523	6.43918	PTx-PS21C	0	0	0
PTxS4	80	87	MFLGPKQL	933.523	6.39858	PTx-PS21C	10	0.747574	0.051482
PTxS4	80	87	MFLGPKQL	933.523	6.41583	PTx-PS21C	30	0.93583	0.189803	1.6834	0.393523	0.569409
PTxS4	81	87	FLGPKQL	802.482	5.87348	PTx	0	0	0
PTxS4	81	87	FLGPKQL	802.482	5.88629	PTx	10	0.871932	0.131579
PTxS4	81	87	FLGPKQL	802.482	5.86188	PTx	30	1.05362	0.11799	1.92556
PTxS4	81	87	FLGPKQL	802.482	5.87348	PTx-PS21C	0	0	0
PTxS4	81	87	FLGPKQL	802.482	5.83287	PTx-PS21C	10	0.713696	0.154461
PTxS4	81	87	FLGPKQL	802.482	5.85657	PTx-PS21C	30	0.949848	0.137688	1.66354	0.262011	0.463383
PTxS4	81	89	FLGPKQLTF	1050.6	6.91039	PTx	0	0	0
PTxS4	81	89	FLGPKQLTF	1050.6	6.91881	PTx	10	1.88182	0.113276
PTxS4	81	89	FLGPKQLTF	1050.6	6.89509	PTx	30	2.22832	0.100393	4.11014
PTxS4	81	89	FLGPKQLTF	1050.6	6.91039	PTx-PS21C	0	0	0
PTxS4	81	89	FLGPKQLTF	1050.6	6.86677	PTx-PS21C	10	1.6178	0.100996
PTxS4	81	89	FLGPKQLTF	1050.6	6.89027	PTx-PS21C	30	1.95904	0.108635	3.57684	0.533302	0.339828
PTxS4	81	90	FLGPKQLTFE	1179.64	6.77221	PTx	0	0	0
PTxS4	81	90	FLGPKQLTFE	1179.64	6.78387	PTx	10	2.29164	0.056645
PTxS4	81	90	FLGPKQLTFE	1179.64	6.75788	PTx	30	2.62288	0.068964	4.91452
PTxS4	81	90	FLGPKQLTFE	1179.64	6.77221	PTx-PS21C	0	0	0
PTxS4	81	90	FLGPKQLTFE	1179.64	6.72899	PTx-PS21C	10	2.02584	0.132525
PTxS4	81	90	FLGPKQLTFE	1179.64	6.7505	PTx-PS21C	30	2.37228	0.132023	4.39812	0.516403	0.397575
PTxS4	81	95	FLGPKQLTFEGKPAL	1645.93	6.48773	PTx	0	0	0
PTxS4	81	95	FLGPKQLTFEGKPAL	1645.93	6.50438	PTx	10	3.31558	0.155349
PTxS4	81	95	FLGPKQLTFEGKPAL	1645.93	6.47546	PTx	30	3.71288	0.17827	7.02846
PTxS4	81	95	FLGPKQLTFEGKPAL	1645.93	6.48773	PTx-PS21C	0	0	0
PTxS4	81	95	FLGPKQLTFEGKPAL	1645.93	6.44551	PTx-PS21C	10	2.98143	0.102801
PTxS4	81	95	FLGPKQLTFEGKPAL	1645.93	6.4716	PTx-PS21C	30	3.53542	0.139892	6.51685	0.51161	0.53481
PTxS4	81	96	FLGPKQLTFEGKPALE	1774.97	6.38117	PTx	0	0	0
PTxS4	81	96	FLGPKQLTFEGKPALE	1774.97	6.39388	PTx	10	3.42152	0.158779
PTxS4	81	96	FLGPKQLTFEGKPALE	1774.97	6.36773	PTx	30	3.8698	0.145236	7.29132
PTxS4	81	96	FLGPKQLTFEGKPALE	1774.97	6.38117	PTx-PS21C	0	0	0
PTxS4	81	96	FLGPKQLTFEGKPALE	1774.97	6.33859	PTx-PS21C	10	3.06837	0.11466
PTxS4	81	96	FLGPKQLTFEGKPALE	1774.97	6.3636	PTx-PS21C	30	3.6424	0.12648	6.71077	0.580556	0.476337
PTxS4	81	97	FLGPKQLTFEGKPALEL	1888.06	6.97514	PTx	0	0	0
PTxS4	81	97	FLGPKQLTFEGKPALEL	1888.06	6.98357	PTx	10	3.2895	0.120232
PTxS4	81	97	FLGPKQLTFEGKPALEL	1888.06	6.96219	PTx	30	3.68841	0.092194	6.97791
PTxS4	81	97	FLGPKQLTFEGKPALEL	1888.06	6.97514	PTx-PS21C	0	0	0
PTxS4	81	97	FLGPKQLTFEGKPALEL	1888.06	6.93535	PTx-PS21C	10	2.97038	0.097175
PTxS4	81	97	FLGPKQLTFEGKPALEL	1888.06	6.96238	PTx-PS21C	30	3.4564	0.086144	6.42677	0.55114	0.360696
PTxS4	82	96	LGPKQLTFEGKPALE	1627.91	5.97343	PTx	0	0	0
PTxS4	82	96	LGPKQLTFEGKPALE	1627.91	5.98392	PTx	10	3.56886	0.354435
PTxS4	82	96	LGPKQLTFEGKPALE	1627.91	5.9637	PTx	30	4.19105	0.08442	7.7599
PTxS4	82	96	LGPKQLTFEGKPALE	1627.91	5.97343	PTx-PS21C	0	0	0
PTxS4	82	96	LGPKQLTFEGKPALE	1627.91	5.9341	PTx-PS21C	10	3.17406	0.23336
PTxS4	82	96	LGPKQLTFEGKPALE	1627.91	5.95737	PTx-PS21C	30	3.75	0.166574	6.92406	0.835849	1.0633
PTxS4	82	97	LGPKQLTFEGKPALEL	1740.99	6.64768	PTx	0	0	0
PTxS4	82	97	LGPKQLTFEGKPALEL	1740.99	6.66457	PTx	10	3.34368	0.106498
PTxS4	82	97	LGPKQLTFEGKPALEL	1740.99	6.63617	PTx	30	3.84926	0.089829	7.19294
PTxS4	82	97	LGPKQLTFEGKPALEL	1740.99	6.64768	PTx-PS21C	0	0	0
PTxS4	82	97	LGPKQLTFEGKPALEL	1740.99	6.60385	PTx-PS21C	10	3.0309	0.09612
PTxS4	82	97	LGPKQLTFEGKPALEL	1740.99	6.62756	PTx-PS21C	30	3.56402	0.123253	6.59492	0.598017	0.369759
PTxS4	83	97	GPKQLTFEGKPALEL	1627.91	6.40735	PTx	0	0	0
PTxS4	83	97	GPKQLTFEGKPALEL	1627.91	6.42455	PTx	10	3.133	0.177572
PTxS4	83	97	GPKQLTFEGKPALEL	1627.91	6.39532	PTx	30	3.41561	0.156099	6.54861
PTxS4	83	97	GPKQLTFEGKPALEL	1627.91	6.40735	PTx-PS21C	0	0	0
PTxS4	83	97	GPKQLTFEGKPALEL	1627.91	6.36506	PTx-PS21C	10	2.77511	0.045819
PTxS4	83	97	GPKQLTFEGKPALEL	1627.91	6.39124	PTx-PS21C	30	3.27976	0.031015	6.05486	0.493746	0.532716
PTxS4	86	97	QLTFEGKPALEL	1345.74	6.99543	PTx	0	0	0
PTxS4	86	97	QLTFEGKPALEL	1345.74	7.00642	PTx	10	2.3761	0.079743
PTxS4	86	97	QLTFEGKPALEL	1345.74	6.98425	PTx	30	2.61644	0.092922	4.99254
PTxS4	86	97	QLTFEGKPALEL	1345.74	6.99543	PTx-PS21C	0	0	0
PTxS4	86	97	QLTFEGKPALEL	1345.74	6.95672	PTx-PS21C	10	2.14893	0.037333
PTxS4	86	97	QLTFEGKPALEL	1345.74	6.9814	PTx-PS21C	30	2.45683	0.083295	4.60576	0.38678	0.278766
PTxS4	87	96	LTFEGKPALE	1104.59	6.53911	PTx	0	0	0
PTxS4	87	96	LTFEGKPALE	1104.59	6.55683	PTx	10	1.63857	0.10695
PTxS4	87	96	LTFEGKPALE	1104.59	6.52765	PTx	30	1.89173	0.086249	3.5303
PTxS4	87	96	LTFEGKPALE	1104.59	6.53911	PTx-PS21C	0	0	0
PTxS4	87	96	LTFEGKPALE	1104.59	6.49706	PTx-PS21C	10	1.46645	0.095608
PTxS4	87	96	LTFEGKPALE	1104.59	6.52098	PTx-PS21C	30	1.75599	0.117087	3.22244	0.307861	0.351261
PTxS4	88	95	TFEGKPAL	862.467	5.38868	PTx	0	0	0
PTxS4	88	95	TFEGKPAL	862.467	5.40342	PTx	10	1.5773	0.049501
PTxS4	88	95	TFEGKPAL	862.467	5.37666	PTx	30	1.90858	0.027384	3.48588
PTxS4	88	95	TFEGKPAL	862.467	5.38868	PTx-PS21C	0	0	0
PTxS4	88	95	TFEGKPAL	862.467	5.35118	PTx-PS21C	10	1.48462	0.027693
PTxS4	88	95	TFEGKPAL	862.467	5.37503	PTx-PS21C	30	1.79152	0.044538	3.27614	0.209742	0.148503
PTxS4	88	96	TFEGKPALE	991.51	5.24993	PTx	0	0	0
PTxS4	88	96	TFEGKPALE	991.51	5.26574	PTx	10	1.64142	0.0347
PTxS4	88	96	TFEGKPALE	991.51	5.24496	PTx	30	1.87717	0.047668	3.51859
PTxS4	88	96	TFEGKPALE	991.51	5.24993	PTx-PS21C	0	0	0
PTxS4	88	96	TFEGKPALE	991.51	5.21495	PTx-PS21C	10	1.58165	0.029859
PTxS4	88	96	TFEGKPALE	991.51	5.23658	PTx-PS21C	30	1.8905	0.028698	3.47215	0.046442	0.143004
PTxS4	88	97	TFEGKPALEL	1104.59	6.40644	PTx	0	0	0
PTxS4	88	97	TFEGKPALEL	1104.59	6.42074	PTx	10	1.52932	0.210719
PTxS4	88	97	TFEGKPALEL	1104.59	6.39357	PTx	30	1.69004	0.197858	3.21936
PTxS4	88	97	TFEGKPALEL	1104.59	6.40644	PTx-PS21C	0	0	0
PTxS4	88	97	TFEGKPALEL	1104.59	6.36363	PTx-PS21C	10	1.40319	0.212481
PTxS4	88	97	TFEGKPALEL	1104.59	6.38746	PTx-PS21C	30	1.59472	0.198862	2.99792	0.221439	0.637443
PTxS4	90	96	EGKPALE	743.393	5.25197	PTx	0	0	0
PTxS4	90	96	EGKPALE	743.393	5.26719	PTx	10	0.965873	0.036837
PTxS4	90	96	EGKPALE	743.393	5.24395	PTx	30	0.983702	0.045639	1.94957
PTxS4	90	96	EGKPALE	743.393	5.25197	PTx-PS21C	0	0	0
PTxS4	90	96	EGKPALE	743.393	5.21579	PTx-PS21C	10	0.947122	0.042282
PTxS4	90	96	EGKPALE	743.393	5.23972	PTx-PS21C	30	0.900009	0.166956	1.84713	0.102444	0.500868
PTxS4	90	97	EGKPALEL	856.477	6.40627	PTx	0	0	0
PTxS4	90	97	EGKPALEL	856.477	6.42046	PTx	10	1.06489	0.050224
PTxS4	90	97	EGKPALEL	856.477	6.39396	PTx	30	1.17254	0.040338	2.23742
PTxS4	90	97	EGKPALEL	856.477	6.40627	PTx-PS21C	0	0	0
PTxS4	90	97	EGKPALEL	856.477	6.36355	PTx-PS21C	10	0.925455	0.029061
PTxS4	90	97	EGKPALEL	856.477	6.38684	PTx-PS21C	30	1.04982	0.017859	1.97527	0.262148	0.150672
PTxS4	91	97	GKPALEL	727.435	5.82978	PTx	0	0	0
PTxS4	91	97	GKPALEL	727.435	5.84659	PTx	10	0.438998	0.082492
PTxS4	91	97	GKPALEL	727.435	5.81993	PTx	30	0.564045	0.065427	1.00304
PTxS4	91	97	GKPALEL	727.435	5.82978	PTx-PS21C	0	0	0
PTxS4	91	97	GKPALEL	727.435	5.79085	PTx-PS21C	10	0.366164	0.068806
PTxS4	91	97	GKPALEL	727.435	5.81551	PTx-PS21C	30	0.490699	0.059549	0.856863	0.14618	0.247476
PTxS4	98	110	IRMVECSGKQDCP	1465.66	5.17255	PTx	0	0	0
PTxS4	98	110	IRMVECSGKQDCP	1465.66	5.19054	PTx	10	1.66961	0.160346
PTxS4	98	110	IRMVECSGKQDCP	1465.66	5.17309	PTx	30	1.67145	0.206515	3.34106
PTxS4	98	110	IRMVECSGKQDCP	1465.66	5.17255	PTx-PS21C	0	0	0
PTxS4	98	110	IRMVECSGKQDCP	1465.66	5.12997	PTx-PS21C	10	1.73954	0.159753
PTxS4	98	110	IRMVECSGKQDCP	1465.66	5.16719	PTx-PS21C	30	1.83425	0.147788	3.57379	-0.232727	0.619545
PTxS4	101	110	VECSGKQDCP	1065.43	4.47835	PTx	0	0	0
PTxS4	101	110	VECSGKQDCP	1065.43	4.4745	PTx	10	1.9169	0.260373
PTxS4	101	110	VECSGKQDCP	1065.43	4.45092	PTx	30	1.96684	0.267269	3.88374
PTxS4	101	110	VECSGKQDCP	1065.43	4.47835	PTx-PS21C	0	0	0
PTxS4	101	110	VECSGKQDCP	1065.43	4.44814	PTx-PS21C	10	1.98488	0.263218
PTxS4	101	110	VECSGKQDCP	1065.43	4.45361	PTx-PS21C	30	2.02751	0.26613	4.01239	-0.128654	0.801807
PTxS4	102	110	ECSGKQDCP	966.365	4.46811	PTx	0	0	0
PTxS4	102	110	ECSGKQDCP	966.365	4.47424	PTx	10	1.55517	0.024392
PTxS4	102	110	ECSGKQDCP	966.365	4.45095	PTx	30	1.641	0.023338	3.19617
PTxS4	102	110	ECSGKQDCP	966.365	4.46811	PTx-PS21C	0	0	0
PTxS4	102	110	ECSGKQDCP	966.365	4.43392	PTx-PS21C	10	1.92506	0.019024
PTxS4	102	110	ECSGKQDCP	966.365	4.45165	PTx-PS21C	30	1.87602	0.123854	3.80109	-0.60492	0.371562
PTxS4	103	110	CSGKQDCP	837.323	4.44051	PTx	0	0	0
PTxS4	103	110	CSGKQDCP	837.323	4.47486	PTx	10	1.04033	0.043775
PTxS4	103	110	CSGKQDCP	837.323	4.44979	PTx	30	1.00107	0.045827	2.0414
PTxS4	103	110	CSGKQDCP	837.323	4.44051	PTx-PS21C	0	0	0
PTxS4	103	110	CSGKQDCP	837.323	4.43922	PTx-PS21C	10	1.08869	0.126591
PTxS4	103	110	CSGKQDCP	837.323	4.45227	PTx-PS21C	30	0.995635	0.061036	2.08432	-0.04292	0.379773
PTxS4	104	110	SGKQDCP	734.314	4.16284	PTx	0	0	0
PTxS4	104	110	SGKQDCP	734.314	4.17936	PTx	10	1.01431	0.052799
PTxS4	104	110	SGKQDCP	734.314	4.16129	PTx	30	1.0674	0.082743	2.08171
PTxS4	104	110	SGKQDCP	734.314	4.16284	PTx-PS21C	0	0	0
PTxS4	104	110	SGKQDCP	734.314	4.12632	PTx-PS21C	10	1.09668	0.074907
PTxS4	104	110	SGKQDCP	734.314	4.13779	PTx-PS21C	30	0.851827	0.038931	1.94851	0.133206	0.248229
PTxS5	1	14	IYSPADVAGLPTHL	1453.77	7.02182	PTx	0	0	0
PTxS5	1	14	IYSPADVAGLPTHL	1453.77	7.02804	PTx	10	3.41283	0.110184
PTxS5	1	14	IYSPADVAGLPTHL	1453.77	7.00228	PTx	30	3.59247	0.066509	7.00529
PTxS5	1	14	IYSPADVAGLPTHL	1453.77	7.02182	PTx-PS21C	0	0	0
PTxS5	1	14	IYSPADVAGLPTHL	1453.77	6.97829	PTx-PS21C	10	3.46073	0.131762
PTxS5	1	14	IYSPADVAGLPTHL	1453.77	7.00644	PTx-PS21C	30	3.68289	0.106394	7.14362	-0.138329	0.395286
PTxS5	1	17	IYSPADVAGLPTHLYKN	1858.97	6.44309	PTx	0	0	0
PTxS5	1	17	IYSPADVAGLPTHLYKN	1858.97	6.44672	PTx	10	4.54874	0.190744
PTxS5	1	17	IYSPADVAGLPTHLYKN	1858.97	6.42039	PTx	30	4.79756	0.186131	9.3463
PTxS5	1	17	IYSPADVAGLPTHLYKN	1858.97	6.44309	PTx-PS21C	0	0	0
PTxS5	1	17	IYSPADVAGLPTHLYKN	1858.97	6.39058	PTx-PS21C	10	4.4534	0.318365
PTxS5	1	17	IYSPADVAGLPTHLYKN	1858.97	6.42673	PTx-PS21C	30	4.846	0.165563	9.29939	0.046905	0.955095
PTxS5	1	18	IYSPADVAGLPTHLYKNF	2006.04	7.12011	PTx	0	0	0
PTxS5	1	18	IYSPADVAGLPTHLYKNF	2006.04	7.11642	PTx	10	4.72654	0.171143
PTxS5	1	18	IYSPADVAGLPTHLYKNF	2006.04	7.09678	PTx	30	4.79955	0.236469	9.52609
PTxS5	1	18	IYSPADVAGLPTHLYKNF	2006.04	7.12011	PTx-PS21C	0	0	0
PTxS5	1	18	IYSPADVAGLPTHLYKNF	2006.04	7.07012	PTx-PS21C	10	4.66875	0.373609
PTxS5	1	18	IYSPADVAGLPTHLYKNF	2006.04	7.09552	PTx-PS21C	30	5.77964	0.314044	10.4484	-0.922298	1.12083
PTxS5	1	22	IYSPADVAGLPTHLYKNFTVQE	2463.26	7.26935	PTx	0	0	0
PTxS5	1	22	IYSPADVAGLPTHLYKNFTVQE	2463.26	7.25957	PTx	10	6.06203	0.182618
PTxS5	1	22	IYSPADVAGLPTHLYKNFTVQE	2463.26	7.23786	PTx	30	7.02971	0.169493	13.0917
PTxS5	1	22	IYSPADVAGLPTHLYKNFTVQE	2463.26	7.26935	PTx-PS21C	0	0	0
PTxS5	1	22	IYSPADVAGLPTHLYKNFTVQE	2463.26	7.21567	PTx-PS21C	10	5.64219	0.389681
PTxS5	1	22	IYSPADVAGLPTHLYKNFTVQE	2463.26	7.24569	PTx-PS21C	30	6.74078	0.119602	12.383	0.708765	1.16904
PTxS5	7	14	VAGLPTHL	807.472	6.144	PTx	0	0	0
PTxS5	7	14	VAGLPTHL	807.472	6.15124	PTx	10	1.87519	0.103214
PTxS5	7	14	VAGLPTHL	807.472	6.13226	PTx	30	1.7967	0.033419	3.67189
PTxS5	7	14	VAGLPTHL	807.472	6.144	PTx-PS21C	0	0	0
PTxS5	7	14	VAGLPTHL	807.472	6.10176	PTx-PS21C	10	1.77391	0.173479
PTxS5	7	14	VAGLPTHL	807.472	6.13017	PTx-PS21C	30	1.9694	0.229574	3.74331	-0.071417	0.688722
PTxS5	15	22	YKNFTVQE	1028.5	5.52366	PTx	0	0	0
PTxS5	15	22	YKNFTVQE	1028.5	5.53887	PTx	10	0.623389	0.159933
PTxS5	15	22	YKNFTVQE	1028.5	5.51505	PTx	30	0.906367	0.113618	1.52976
PTxS5	15	22	YKNFTVQE	1028.5	5.52366	PTx-PS21C	0	0	0
PTxS5	15	22	YKNFTVQE	1028.5	5.48607	PTx-PS21C	10	0.477393	0.126324
PTxS5	15	22	YKNFTVQE	1028.5	5.51588	PTx-PS21C	30	0.859781	0.101014	1.33717	0.192582	0.479799
PTxS5	15	23	YKNFTVQEL	1141.59	6.51941	PTx	0	0	0
PTxS5	15	23	YKNFTVQEL	1141.59	6.53945	PTx	10	0.6491	0.118277
PTxS5	15	23	YKNFTVQEL	1141.59	6.50853	PTx	30	1.10492	0.059415	1.75402
PTxS5	15	23	YKNFTVQEL	1141.59	6.51941	PTx-PS21C	0	0	0
PTxS5	15	23	YKNFTVQEL	1141.59	6.47722	PTx-PS21C	10	0.474081	0.098574
PTxS5	15	23	YKNFTVQEL	1141.59	6.50447	PTx-PS21C	30	0.805949	0.052731	1.28003	0.473985	0.354831
PTxS5	51	61	SDAGHEHDTWF	1301.52	6.36372	PTx	0	0	0
PTxS5	51	61	SDAGHEHDTWF	1301.52	6.37761	PTx	10	0.788871	0.159355
PTxS5	51	61	SDAGHEHDTWF	1301.52	6.35107	PTx	30	0.935547	0.143256	1.72442
PTxS5	51	61	SDAGHEHDTWF	1301.52	6.36372	PTx-PS21C	0	0	0
PTxS5	51	61	SDAGHEHDTWF	1301.52	6.32019	PTx-PS21C	10	0.909806	0.172983
PTxS5	51	61	SDAGHEHDTWF	1301.52	6.35072	PTx-PS21C	30	1.15593	0.178837	2.06574	-0.341321	0.536511
PTxS5	72	80	YALKSRIAL	1034.64	5.64299	PTx	0	0	0
PTxS5	72	80	YALKSRIAL	1034.64	5.65667	PTx	10	0.121645	0.11381
PTxS5	72	80	YALKSRIAL	1034.64	5.63263	PTx	30	0.102588	0.106732	0.224233
PTxS5	72	80	YALKSRIAL	1034.64	5.64299	PTx-PS21C	0	0	0
PTxS5	72	80	YALKSRIAL	1034.64	5.60434	PTx-PS21C	10	0.07099	0.0915
PTxS5	72	80	YALKSRIAL	1034.64	5.63155	PTx-PS21C	30	0.102122	0.095246	0.173112	0.051121	0.34143
PTxS5	80	96	LTVEDSPYPGTPGDLLE	1802.87	7.61798	PTx	0	0	0
PTxS5	80	96	LTVEDSPYPGTPGDLLE	1802.87	7.62088	PTx	10	1.75493	0.158665
PTxS5	80	96	LTVEDSPYPGTPGDLLE	1802.87	7.59792	PTx	30	1.73973	0.10824	3.49466
PTxS5	80	96	LTVEDSPYPGTPGDLLE	1802.87	7.61798	PTx-PS21C	0	0	0
PTxS5	80	96	LTVEDSPYPGTPGDLLE	1802.87	7.57243	PTx-PS21C	10	1.75233	0.196512
PTxS5	80	96	LTVEDSPYPGTPGDLLE	1802.87	7.59248	PTx-PS21C	30	1.82157	0.198107	3.57389	-0.079236	0.594321
PTxS5	81	94	TVEDSPYPGTPGDL	1447.66	6.81921	PTx	0	0	0
PTxS5	81	94	TVEDSPYPGTPGDL	1447.66	6.82801	PTx	10	1.85187	0.064467
PTxS5	81	94	TVEDSPYPGTPGDL	1447.66	6.80573	PTx	30	1.9924	0.074756	3.84428
PTxS5	81	94	TVEDSPYPGTPGDL	1447.66	6.81921	PTx-PS21C	0	0	0
PTxS5	81	94	TVEDSPYPGTPGDL	1447.66	6.77495	PTx-PS21C	10	2.00413	0.131622
PTxS5	81	94	TVEDSPYPGTPGDL	1447.66	6.80243	PTx-PS21C	30	1.95921	0.162806	3.96335	-0.11907	0.488418
PTxS5	84	94	DSPYPGTPGDL	1118.5	6.86318	PTx	0	0	0
PTxS5	84	94	DSPYPGTPGDL	1118.5	6.87097	PTx	10	1.68882	0.074961
PTxS5	84	94	DSPYPGTPGDL	1118.5	6.8487	PTx	30	1.75449	0.143137	3.44331
PTxS5	84	94	DSPYPGTPGDL	1118.5	6.86318	PTx-PS21C	0	0	0
PTxS5	84	94	DSPYPGTPGDL	1118.5	6.81931	PTx-PS21C	10	1.62028	0.110177
PTxS5	84	94	DSPYPGTPGDL	1118.5	6.84396	PTx-PS21C	30	1.8849	0.067005	3.50518	-0.061869	0.429411
PTxS5	84	96	DSPYPGTPGDLLE	1360.63	7.54402	PTx	0	0	0
PTxS5	84	96	DSPYPGTPGDLLE	1360.63	7.54853	PTx	10	1.61386	0.133816
PTxS5	84	96	DSPYPGTPGDLLE	1360.63	7.52757	PTx	30	1.73835	0.07873	3.35221
PTxS5	84	96	DSPYPGTPGDLLE	1360.63	7.54402	PTx-PS21C	0	0	0
PTxS5	84	96	DSPYPGTPGDLLE	1360.63	7.50331	PTx-PS21C	10	1.47691	0.174421
PTxS5	84	96	DSPYPGTPGDLLE	1360.63	7.52426	PTx-PS21C	30	1.80733	0.087001	3.28423	0.067972	0.523263
PTxS5	98	104	QICPLNG	744.371	6.12929	PTx	0	0	0
PTxS5	98	104	QICPLNG	744.371	6.13758	PTx	10	0.566006	0.032882
PTxS5	98	104	QICPLNG	744.371	6.11759	PTx	30	0.513802	0.037069	1.07981
PTxS5	98	104	QICPLNG	744.371	6.12929	PTx-PS21C	0	0	0
PTxS5	98	104	QICPLNG	744.371	6.08663	PTx-PS21C	10	0.559067	0.038196
PTxS5	98	104	QICPLNG	744.371	6.11619	PTx-PS21C	30	0.491866	0.08231	1.05093	0.028875	0.24693
PTxS5	98	107	QICPLNGYCE	1139.49	7.17593	PTx	0	0	0
PTxS5	98	107	QICPLNGYCE	1139.49	7.18373	PTx	10	1.46503	0.020553
PTxS5	98	107	QICPLNGYCE	1139.49	7.16308	PTx	30	1.48898	0.021681	2.95401
PTxS5	98	107	QICPLNGYCE	1139.49	7.17593	PTx-PS21C	0	0	0
PTxS5	98	107	QICPLNGYCE	1139.49	7.13441	PTx-PS21C	10	1.45577	0.026418
PTxS5	98	107	QICPLNGYCE	1139.49	7.16718	PTx-PS21C	30	1.55501	0.03629	3.01078	-0.056775	0.10887

## Sheet: TTd-8E1 Difference
Tetanus Toxoid bound to mAb 8E1-1H1
Protein	Start	End	Sequence	MHP	RT	State	Exposure	Uptake	Uptake SD	Summed Uptake	Difference in Summed Uptake	3*maxSD		Total Sequence Coverage:	72.4	Sequence Redundancy	3.12
sps	1	7	PITINNF	818.441	6.96802	TTd	0	0	0
sps	1	7	PITINNF	818.441	6.96618	TTd	10	2.34493	0.143851
sps	1	7	PITINNF	818.441	6.95849	TTd	30	2.56261	0.087983	4.90754
sps	1	7	PITINNF	818.441	6.96802	TTd-8E1-1H1	0	0	0
sps	1	7	PITINNF	818.441	6.96205	TTd-8E1-1H1	10	2.39366	0.023283
sps	1	7	PITINNF	818.441	6.96016	TTd-8E1-1H1	30	2.59065	0.114282	4.98432	-0.076781	0.431553
sps	6	16	NFRYSDPVNND	1340.59	5.41932	TTd	0	0	0
sps	6	16	NFRYSDPVNND	1340.59	5.41455	TTd	10	2.17278	0.304568
sps	6	16	NFRYSDPVNND	1340.59	5.40897	TTd	30	2.55636	0.075246	4.72914
sps	6	16	NFRYSDPVNND	1340.59	5.41932	TTd-8E1-1H1	0	0	0
sps	6	16	NFRYSDPVNND	1340.59	5.41512	TTd-8E1-1H1	10	2.26735	0.046473
sps	6	16	NFRYSDPVNND	1340.59	5.41131	TTd-8E1-1H1	30	2.46103	0.083723	4.72838	0.000759	0.913704
sps	6	20	NFRYSDPVNNDTIIM	1798.84	6.76576	TTd	0	0	0
sps	6	20	NFRYSDPVNNDTIIM	1798.84	6.76648	TTd	10	2.20815	0.328507
sps	6	20	NFRYSDPVNNDTIIM	1798.84	6.75574	TTd	30	2.75705	0.101667	4.96521
sps	6	20	NFRYSDPVNNDTIIM	1798.84	6.76576	TTd-8E1-1H1	0	0	0
sps	6	20	NFRYSDPVNNDTIIM	1798.84	6.76051	TTd-8E1-1H1	10	2.38794	0.1879
sps	6	20	NFRYSDPVNNDTIIM	1798.84	6.75949	TTd-8E1-1H1	30	2.75656	0.141119	5.1445	-0.179295	0.985521
sps	7	19	FRYSDPVNNDTII	1553.76	6.50206	TTd	0	0	0
sps	7	19	FRYSDPVNNDTII	1553.76	6.4974	TTd	10	2.02253	0.414969
sps	7	19	FRYSDPVNNDTII	1553.76	6.4898	TTd	30	2.43728	0.061892	4.45981
sps	7	19	FRYSDPVNNDTII	1553.76	6.50206	TTd-8E1-1H1	0	0	0
sps	7	19	FRYSDPVNNDTII	1553.76	6.49294	TTd-8E1-1H1	10	2.29512	0.075328
sps	7	19	FRYSDPVNNDTII	1553.76	6.49195	TTd-8E1-1H1	30	2.42907	0.176328	4.72419	-0.264372	1.24491
sps	8	15	RYSDPVNN	964.448	4.28265	TTd	0	0	0
sps	8	15	RYSDPVNN	964.448	4.28759	TTd	10	1.66327	0.254952
sps	8	15	RYSDPVNN	964.448	4.29301	TTd	30	1.83384	0.087881	3.49711
sps	8	15	RYSDPVNN	964.448	4.28265	TTd-8E1-1H1	0	0	0
sps	8	15	RYSDPVNN	964.448	4.28919	TTd-8E1-1H1	10	1.82835	0.086197
sps	8	15	RYSDPVNN	964.448	4.29901	TTd-8E1-1H1	30	1.84412	0.15225	3.67248	-0.175373	0.764856
sps	8	16	RYSDPVNND	1079.48	4.48346	TTd	0	0	0
sps	8	16	RYSDPVNND	1079.48	4.49219	TTd	10	1.67857	0.233744
sps	8	16	RYSDPVNND	1079.48	4.50181	TTd	30	1.73767	0.157156	3.41624
sps	8	16	RYSDPVNND	1079.48	4.48346	TTd-8E1-1H1	0	0	0
sps	8	16	RYSDPVNND	1079.48	4.50237	TTd-8E1-1H1	10	1.70751	0.162991
sps	8	16	RYSDPVNND	1079.48	4.49799	TTd-8E1-1H1	30	1.69756	0.191464	3.40507	0.011167	0.701232
sps	8	19	RYSDPVNNDTII	1406.69	6.00753	TTd	0	0	0
sps	8	19	RYSDPVNNDTII	1406.69	6.00173	TTd	10	1.59927	0.143679
sps	8	19	RYSDPVNNDTII	1406.69	5.99464	TTd	30	1.83569	0.034297	3.43496
sps	8	19	RYSDPVNNDTII	1406.69	6.00753	TTd-8E1-1H1	0	0	0
sps	8	19	RYSDPVNNDTII	1406.69	6.00065	TTd-8E1-1H1	10	1.64169	0.067261
sps	8	19	RYSDPVNNDTII	1406.69	5.99711	TTd-8E1-1H1	30	1.70028	0.105735	3.34197	0.092992	0.431037
sps	21	27	MEPPYCK	867.374	4.89741	TTd	0	0	0
sps	21	27	MEPPYCK	867.374	4.89581	TTd	10	0.524102	0.179401
sps	21	27	MEPPYCK	867.374	4.88802	TTd	30	0.761644	0.047143	1.28575
sps	21	27	MEPPYCK	867.374	4.89741	TTd-8E1-1H1	0	0	0
sps	21	27	MEPPYCK	867.374	4.89647	TTd-8E1-1H1	10	0.700966	0.051144
sps	21	27	MEPPYCK	867.374	4.89065	TTd-8E1-1H1	30	0.89608	0.177972	1.59705	-0.3113	0.538203
sps	31	43	IYYKAFKITDRIW	1716.95	6.47708	TTd	0	0	0
sps	31	43	IYYKAFKITDRIW	1716.95	6.48124	TTd	10	0.483156	0.113392
sps	31	43	IYYKAFKITDRIW	1716.95	6.46547	TTd	30	0.755992	0.104621	1.23915
sps	31	43	IYYKAFKITDRIW	1716.95	6.47708	TTd-8E1-1H1	0	0	0
sps	31	43	IYYKAFKITDRIW	1716.95	6.47354	TTd-8E1-1H1	10	0.614575	0.090064
sps	31	43	IYYKAFKITDRIW	1716.95	6.46973	TTd-8E1-1H1	30	0.787149	0.088847	1.40172	-0.162576	0.340176
sps	33	43	YKAFKITDRIW	1440.8	6.13201	TTd	0	0	0
sps	33	43	YKAFKITDRIW	1440.8	6.13874	TTd	10	0.414097	0.099912
sps	33	43	YKAFKITDRIW	1440.8	6.12758	TTd	30	0.629881	0.07999	1.04398
sps	33	43	YKAFKITDRIW	1440.8	6.13201	TTd-8E1-1H1	0	0	0
sps	33	43	YKAFKITDRIW	1440.8	6.13579	TTd-8E1-1H1	10	0.428413	0.090818
sps	33	43	YKAFKITDRIW	1440.8	6.13157	TTd-8E1-1H1	30	0.605189	0.098108	1.0336	0.010376	0.299736
sps	36	43	FKITDRIW	1078.6	6.43074	TTd	0	0	0
sps	36	43	FKITDRIW	1078.6	6.43089	TTd	10	0.430381	0.26548
sps	36	43	FKITDRIW	1078.6	6.41974	TTd	30	0.599651	0.235619	1.03003
sps	36	43	FKITDRIW	1078.6	6.43074	TTd-8E1-1H1	0	0	0
sps	36	43	FKITDRIW	1078.6	6.42833	TTd-8E1-1H1	10	0.498665	0.23031
sps	36	43	FKITDRIW	1078.6	6.4228	TTd-8E1-1H1	30	0.59486	0.215815	1.09353	-0.063493	0.79644
sps	41	64	RIWIVPERYEFGTKPEDFNPPSSL	2877.46	6.6753	TTd	0	0	0
sps	41	64	RIWIVPERYEFGTKPEDFNPPSSL	2877.46	6.68016	TTd	10	3.09906	0.425777
sps	41	64	RIWIVPERYEFGTKPEDFNPPSSL	2877.46	6.66697	TTd	30	3.90343	0.237505	7.00249
sps	41	64	RIWIVPERYEFGTKPEDFNPPSSL	2877.46	6.6753	TTd-8E1-1H1	0	0	0
sps	41	64	RIWIVPERYEFGTKPEDFNPPSSL	2877.46	6.67001	TTd-8E1-1H1	10	3.24801	0.221249
sps	41	64	RIWIVPERYEFGTKPEDFNPPSSL	2877.46	6.67052	TTd-8E1-1H1	30	3.81671	0.189139	7.06471	-0.062222	1.27733
sps	42	48	IWIVPER	912.53	6.10418	TTd	0	0	0
sps	42	48	IWIVPER	912.53	6.10483	TTd	10	0.211686	0.101138
sps	42	48	IWIVPER	912.53	6.09809	TTd	30	0.321026	0.082389	0.532712
sps	42	48	IWIVPER	912.53	6.10418	TTd-8E1-1H1	0	0	0
sps	42	48	IWIVPER	912.53	6.10451	TTd-8E1-1H1	10	0.248002	0.088016
sps	42	48	IWIVPER	912.53	6.10139	TTd-8E1-1H1	30	0.297759	0.076243	0.545761	-0.013049	0.303414
sps	42	64	IWIVPERYEFGTKPEDFNPPSSL	2721.36	7.05337	TTd	0	0	0
sps	42	64	IWIVPERYEFGTKPEDFNPPSSL	2721.36	7.06089	TTd	10	2.86412	0.261654
sps	42	64	IWIVPERYEFGTKPEDFNPPSSL	2721.36	7.04879	TTd	30	3.57068	0.203322	6.4348
sps	42	64	IWIVPERYEFGTKPEDFNPPSSL	2721.36	7.05337	TTd-8E1-1H1	0	0	0
sps	42	64	IWIVPERYEFGTKPEDFNPPSSL	2721.36	7.05139	TTd-8E1-1H1	10	3.11111	0.165513
sps	42	64	IWIVPERYEFGTKPEDFNPPSSL	2721.36	7.05358	TTd-8E1-1H1	30	3.64977	0.205098	6.76089	-0.326093	0.784962
sps	43	64	WIVPERYEFGTKPEDFNPPSSL	2608.27	6.8826	TTd	0	0	0
sps	43	64	WIVPERYEFGTKPEDFNPPSSL	2608.27	6.88751	TTd	10	2.9856	0.321763
sps	43	64	WIVPERYEFGTKPEDFNPPSSL	2608.27	6.87587	TTd	30	3.6377	0.13995	6.6233
sps	43	64	WIVPERYEFGTKPEDFNPPSSL	2608.27	6.8826	TTd-8E1-1H1	0	0	0
sps	43	64	WIVPERYEFGTKPEDFNPPSSL	2608.27	6.8794	TTd-8E1-1H1	10	3.17699	0.103902
sps	43	64	WIVPERYEFGTKPEDFNPPSSL	2608.27	6.87838	TTd-8E1-1H1	30	3.60447	0.086734	6.78146	-0.158156	0.965289
sps	44	50	IVPERYE	905.473	4.74381	TTd	0	0	0
sps	44	50	IVPERYE	905.473	4.74728	TTd	10	0.549287	0.214513
sps	44	50	IVPERYE	905.473	4.74182	TTd	30	0.711533	0.056552	1.26082
sps	44	50	IVPERYE	905.473	4.74381	TTd-8E1-1H1	0	0	0
sps	44	50	IVPERYE	905.473	4.7489	TTd-8E1-1H1	10	0.587867	0.054629
sps	44	50	IVPERYE	905.473	4.74591	TTd-8E1-1H1	30	0.743467	0.043001	1.33133	-0.070514	0.643539
sps	44	51	IVPERYEF	1052.54	6.04884	TTd	0	0	0
sps	44	51	IVPERYEF	1052.54	6.04859	TTd	10	0.860903	0.173972
sps	44	51	IVPERYEF	1052.54	6.04192	TTd	30	1.26548	0.105358	2.12639
sps	44	51	IVPERYEF	1052.54	6.04884	TTd-8E1-1H1	0	0	0
sps	44	51	IVPERYEF	1052.54	6.0495	TTd-8E1-1H1	10	1.10809	0.136854
sps	44	51	IVPERYEF	1052.54	6.04786	TTd-8E1-1H1	30	1.32875	0.130102	2.43683	-0.310448	0.521916
sps	44	57	IVPERYEFGTKPED	1679.83	5.24671	TTd	0	0	0
sps	44	57	IVPERYEFGTKPED	1679.83	5.244	TTd	10	2.20695	0.289888
sps	44	57	IVPERYEFGTKPED	1679.83	5.23813	TTd	30	2.67457	0.086077	4.88152
sps	44	57	IVPERYEFGTKPED	1679.83	5.24671	TTd-8E1-1H1	0	0	0
sps	44	57	IVPERYEFGTKPED	1679.83	5.2441	TTd-8E1-1H1	10	2.49257	0.070463
sps	44	57	IVPERYEFGTKPED	1679.83	5.24174	TTd-8E1-1H1	30	2.70991	0.081996	5.20248	-0.320962	0.869664
sps	44	64	IVPERYEFGTKPEDFNPPSSL	2422.19	6.32979	TTd	0	0	0
sps	44	64	IVPERYEFGTKPEDFNPPSSL	2422.19	6.32215	TTd	10	2.93426	0.357202
sps	44	64	IVPERYEFGTKPEDFNPPSSL	2422.19	6.31567	TTd	30	3.61162	0.141222	6.54588
sps	44	64	IVPERYEFGTKPEDFNPPSSL	2422.19	6.32979	TTd-8E1-1H1	0	0	0
sps	44	64	IVPERYEFGTKPEDFNPPSSL	2422.19	6.31752	TTd-8E1-1H1	10	3.22025	0.168566
sps	44	64	IVPERYEFGTKPEDFNPPSSL	2422.19	6.31838	TTd-8E1-1H1	30	3.56807	0.136769	6.78832	-0.242444	1.07161
sps	49	64	YEFGTKPEDFNPPSSL	1827.84	6.60674	TTd	0	0	0
sps	49	64	YEFGTKPEDFNPPSSL	1827.84	6.60166	TTd	10	2.44523	0.23327
sps	49	64	YEFGTKPEDFNPPSSL	1827.84	6.59455	TTd	30	2.88137	0.034405	5.3266
sps	49	64	YEFGTKPEDFNPPSSL	1827.84	6.60674	TTd-8E1-1H1	0	0	0
sps	49	64	YEFGTKPEDFNPPSSL	1827.84	6.59773	TTd-8E1-1H1	10	2.55233	0.02721
sps	49	64	YEFGTKPEDFNPPSSL	1827.84	6.59785	TTd-8E1-1H1	30	2.77299	0.017885	5.32532	0.001278	0.69981
sps	52	64	GTKPEDFNPPSSL	1388.67	5.79187	TTd	0	0	0
sps	52	64	GTKPEDFNPPSSL	1388.67	5.79186	TTd	10	1.55255	0.120744
sps	52	64	GTKPEDFNPPSSL	1388.67	5.7875	TTd	30	1.85252	0.039003	3.40507
sps	52	64	GTKPEDFNPPSSL	1388.67	5.79187	TTd-8E1-1H1	0	0	0
sps	52	64	GTKPEDFNPPSSL	1388.67	5.79131	TTd-8E1-1H1	10	1.49919	0.021219
sps	52	64	GTKPEDFNPPSSL	1388.67	5.78841	TTd-8E1-1H1	30	1.71603	0.055347	3.21522	0.18985	0.362232
sps	57	64	DFNPPSSL	876.41	6.64021	TTd	0	0	0
sps	57	64	DFNPPSSL	876.41	6.63343	TTd	10	0.974415	0.07862
sps	57	64	DFNPPSSL	876.41	6.62949	TTd	30	1.1622	0.015459	2.13661
sps	57	64	DFNPPSSL	876.41	6.64021	TTd-8E1-1H1	0	0	0
sps	57	64	DFNPPSSL	876.41	6.63206	TTd-8E1-1H1	10	0.996541	0.028493
sps	57	64	DFNPPSSL	876.41	6.6315	TTd-8E1-1H1	30	1.13994	0.01572	2.13648	0.000128	0.23586
sps	58	64	FNPPSSL	761.383	6.16011	TTd	0	0	0
sps	58	64	FNPPSSL	761.383	6.15796	TTd	10	1.00519	0.098135
sps	58	64	FNPPSSL	761.383	6.15427	TTd	30	1.13049	0.011469	2.13568
sps	58	64	FNPPSSL	761.383	6.16011	TTd-8E1-1H1	0	0	0
sps	58	64	FNPPSSL	761.383	6.15594	TTd-8E1-1H1	10	1.06854	0.021193
sps	58	64	FNPPSSL	761.383	6.1551	TTd-8E1-1H1	30	1.12837	0.026721	2.19691	-0.061235	0.294405
sps	71	77	YYDPNYL	947.414	6.85279	TTd	0	0	0
sps	71	77	YYDPNYL	947.414	6.84936	TTd	10	1.13328	0.169657
sps	71	77	YYDPNYL	947.414	6.84213	TTd	30	1.3216	0.036503	2.45488
sps	71	77	YYDPNYL	947.414	6.85279	TTd-8E1-1H1	0	0	0
sps	71	77	YYDPNYL	947.414	6.84576	TTd-8E1-1H1	10	1.32611	0.063939
sps	71	77	YYDPNYL	947.414	6.84235	TTd-8E1-1H1	30	1.18855	0.049332	2.51466	-0.059773	0.508971
sps	71	78	YYDPNYLR	1103.52	5.6136	TTd	0	0	0
sps	71	78	YYDPNYLR	1103.52	5.6103	TTd	10	1.45072	0.216658
sps	71	78	YYDPNYLR	1103.52	5.60899	TTd	30	1.83638	0.040824	3.2871
sps	71	78	YYDPNYLR	1103.52	5.6136	TTd-8E1-1H1	0	0	0
sps	71	78	YYDPNYLR	1103.52	5.60934	TTd-8E1-1H1	10	1.6222	0.08112
sps	71	78	YYDPNYLR	1103.52	5.60619	TTd-8E1-1H1	30	1.81541	0.071172	3.43761	-0.150509	0.649974
sps	71	79	YYDPNYLRT	1204.56	5.68864	TTd	0	0	0
sps	71	79	YYDPNYLRT	1204.56	5.68691	TTd	10	2.19979	0.174642
sps	71	79	YYDPNYLRT	1204.56	5.68426	TTd	30	2.50254	0.022055	4.70233
sps	71	79	YYDPNYLRT	1204.56	5.68864	TTd-8E1-1H1	0	0	0
sps	71	79	YYDPNYLRT	1204.56	5.68547	TTd-8E1-1H1	10	2.33268	0.041088
sps	71	79	YYDPNYLRT	1204.56	5.68396	TTd-8E1-1H1	30	2.47446	0.048921	4.80714	-0.104808	0.523926
sps	71	80	YYDPNYLRTD	1319.59	5.75636	TTd	0	0	0
sps	71	80	YYDPNYLRTD	1319.59	5.75412	TTd	10	2.03126	0.222513
sps	71	80	YYDPNYLRTD	1319.59	5.74923	TTd	30	2.37607	0.039932	4.40733
sps	71	80	YYDPNYLRTD	1319.59	5.75636	TTd-8E1-1H1	0	0	0
sps	71	80	YYDPNYLRTD	1319.59	5.75324	TTd-8E1-1H1	10	2.19535	0.047354
sps	71	80	YYDPNYLRTD	1319.59	5.74928	TTd-8E1-1H1	30	2.34884	0.048467	4.54419	-0.136863	0.667539
sps	71	86	YYDPNYLRTDSDKDRF	2067.94	5.56845	TTd	0	0	0
sps	71	86	YYDPNYLRTDSDKDRF	2067.94	5.56669	TTd	10	2.19789	0.312833
sps	71	86	YYDPNYLRTDSDKDRF	2067.94	5.56478	TTd	30	2.59855	0.20253	4.79644
sps	71	86	YYDPNYLRTDSDKDRF	2067.94	5.56845	TTd-8E1-1H1	0	0	0
sps	71	86	YYDPNYLRTDSDKDRF	2067.94	5.56608	TTd-8E1-1H1	10	2.42245	0.214922
sps	71	86	YYDPNYLRTDSDKDRF	2067.94	5.56222	TTd-8E1-1H1	30	2.59925	0.211042	5.02171	-0.225267	0.938499
sps	71	89	YYDPNYLRTDSDKDRFLQT	2410.13	5.84606	TTd	0	0	0
sps	71	89	YYDPNYLRTDSDKDRFLQT	2410.13	5.84565	TTd	10	2.25382	0.314252
sps	71	89	YYDPNYLRTDSDKDRFLQT	2410.13	5.83923	TTd	30	2.65551	0.190514	4.90933
sps	71	89	YYDPNYLRTDSDKDRFLQT	2410.13	5.84606	TTd-8E1-1H1	0	0	0
sps	71	89	YYDPNYLRTDSDKDRFLQT	2410.13	5.84421	TTd-8E1-1H1	10	2.43487	0.202499
sps	71	89	YYDPNYLRTDSDKDRFLQT	2410.13	5.84135	TTd-8E1-1H1	30	2.59326	0.228734	5.02813	-0.118799	0.942756
sps	71	90	YYDPNYLRTDSDKDRFLQTM	2541.17	6.23233	TTd	0	0	0
sps	71	90	YYDPNYLRTDSDKDRFLQTM	2541.17	6.23022	TTd	10	2.14328	0.33001
sps	71	90	YYDPNYLRTDSDKDRFLQTM	2541.17	6.2227	TTd	30	2.56045	0.202792	4.70372
sps	71	90	YYDPNYLRTDSDKDRFLQTM	2541.17	6.23233	TTd-8E1-1H1	0	0	0
sps	71	90	YYDPNYLRTDSDKDRFLQTM	2541.17	6.22739	TTd-8E1-1H1	10	2.40835	0.207702
sps	71	90	YYDPNYLRTDSDKDRFLQTM	2541.17	6.22612	TTd-8E1-1H1	30	2.56057	0.203281	4.96892	-0.265193	0.99003
sps	73	86	DPNYLRTDSDKDRF	1741.81	5.57008	TTd	0	0	0
sps	73	86	DPNYLRTDSDKDRF	1741.81	5.56904	TTd	10	1.69478	0.325004
sps	73	86	DPNYLRTDSDKDRF	1741.81	5.56747	TTd	30	1.90014	0.235228	3.59492
sps	73	86	DPNYLRTDSDKDRF	1741.81	5.57008	TTd-8E1-1H1	0	0	0
sps	73	86	DPNYLRTDSDKDRF	1741.81	5.56715	TTd-8E1-1H1	10	2.02682	0.151065
sps	73	86	DPNYLRTDSDKDRF	1741.81	5.56369	TTd-8E1-1H1	30	2.26551	0.117595	4.29233	-0.697413	0.975012
sps	74	89	PNYLRTDSDKDRFLQT	1968.98	5.85058	TTd	0	0	0
sps	74	89	PNYLRTDSDKDRFLQT	1968.98	5.85406	TTd	10	0.465915	0.141932
sps	74	89	PNYLRTDSDKDRFLQT	1968.98	5.84222	TTd	30	0.603702	0.201612	1.06962
sps	74	89	PNYLRTDSDKDRFLQT	1968.98	5.85058	TTd-8E1-1H1	0	0	0
sps	74	89	PNYLRTDSDKDRFLQT	1968.98	5.84653	TTd-8E1-1H1	10	0.738693	0.008543
sps	74	89	PNYLRTDSDKDRFLQT	1968.98	5.84775	TTd-8E1-1H1	30	0.472924	0.115714	1.21162	-0.142	0.604836
sps	77	89	LRTDSDKDRFLQT	1594.82	4.7227	TTd	0	0	0
sps	77	89	LRTDSDKDRFLQT	1594.82	4.73076	TTd	10	0.698336	0.161081
sps	77	89	LRTDSDKDRFLQT	1594.82	4.72328	TTd	30	0.791015	0.195342	1.48935
sps	77	89	LRTDSDKDRFLQT	1594.82	4.7227	TTd-8E1-1H1	0	0	0
sps	77	89	LRTDSDKDRFLQT	1594.82	4.72876	TTd-8E1-1H1	10	0.745489	0.159524
sps	77	89	LRTDSDKDRFLQT	1594.82	4.72598	TTd-8E1-1H1	30	0.730543	0.144929	1.47603	0.013319	0.586026
sps	90	96	MVKLFNR	907.518	5.07536	TTd	0	0	0
sps	90	96	MVKLFNR	907.518	5.07609	TTd	10	0.131571	0.186977
sps	90	96	MVKLFNR	907.518	5.06564	TTd	30	0.14353	0.180543	0.275101
sps	90	96	MVKLFNR	907.518	5.07536	TTd-8E1-1H1	0	0	0
sps	90	96	MVKLFNR	907.518	5.07482	TTd-8E1-1H1	10	0.137216	0.174044
sps	90	96	MVKLFNR	907.518	5.07215	TTd-8E1-1H1	30	0.084027	0.160501	0.221243	0.053858	0.560931
sps	90	106	MVKLFNRIKNNVAGEAL	1917.07	5.91573	TTd	0	0	0
sps	90	106	MVKLFNRIKNNVAGEAL	1917.07	5.91528	TTd	10	1.02338	0.107662
sps	90	106	MVKLFNRIKNNVAGEAL	1917.07	5.90822	TTd	30	1.10477	0.081393	2.12815
sps	90	106	MVKLFNRIKNNVAGEAL	1917.07	5.91573	TTd-8E1-1H1	0	0	0
sps	90	106	MVKLFNRIKNNVAGEAL	1917.07	5.91366	TTd-8E1-1H1	10	1.12084	0.076376
sps	90	106	MVKLFNRIKNNVAGEAL	1917.07	5.91173	TTd-8E1-1H1	30	1.0994	0.101297	2.22025	-0.092093	0.322986
sps	90	107	MVKLFNRIKNNVAGEALL	2030.16	6.29	TTd	0	0	0
sps	90	107	MVKLFNRIKNNVAGEALL	2030.16	6.29128	TTd	10	1.17199	0.132266
sps	90	107	MVKLFNRIKNNVAGEALL	2030.16	6.27988	TTd	30	1.23824	0.154221	2.41023
sps	90	107	MVKLFNRIKNNVAGEALL	2030.16	6.29	TTd-8E1-1H1	0	0	0
sps	90	107	MVKLFNRIKNNVAGEALL	2030.16	6.28593	TTd-8E1-1H1	10	1.21544	0.189368
sps	90	107	MVKLFNRIKNNVAGEALL	2030.16	6.28463	TTd-8E1-1H1	30	1.30275	0.128057	2.51819	-0.107965	0.568104
sps	94	106	FNRIKNNVAGEAL	1445.79	5.04516	TTd	0	0	0
sps	94	106	FNRIKNNVAGEAL	1445.79	5.03449	TTd	10	0.841863	0.109642
sps	94	106	FNRIKNNVAGEAL	1445.79	5.03217	TTd	30	0.909116	0.10634	1.75098
sps	94	106	FNRIKNNVAGEAL	1445.79	5.04516	TTd-8E1-1H1	0	0	0
sps	94	106	FNRIKNNVAGEAL	1445.79	5.03826	TTd-8E1-1H1	10	0.945035	0.128255
sps	94	106	FNRIKNNVAGEAL	1445.79	5.03768	TTd-8E1-1H1	30	0.921207	0.122715	1.86624	-0.115263	0.384765
sps	94	107	FNRIKNNVAGEALL	1558.87	5.60682	TTd	0	0	0
sps	94	107	FNRIKNNVAGEALL	1558.87	5.60613	TTd	10	1.00581	0.097971
sps	94	107	FNRIKNNVAGEALL	1558.87	5.60361	TTd	30	1.08527	0.07097	2.09108
sps	94	107	FNRIKNNVAGEALL	1558.87	5.60682	TTd-8E1-1H1	0	0	0
sps	94	107	FNRIKNNVAGEALL	1558.87	5.6043	TTd-8E1-1H1	10	0.99614	0.089037
sps	94	107	FNRIKNNVAGEALL	1558.87	5.60105	TTd-8E1-1H1	30	0.989838	0.094849	1.98598	0.105106	0.293913
sps	97	106	IKNNVAGEAL	1028.57	4.98178	TTd	0	0	0
sps	97	106	IKNNVAGEAL	1028.57	4.97593	TTd	10	0.947139	0.153434
sps	97	106	IKNNVAGEAL	1028.57	4.96933	TTd	30	0.991416	0.147775	1.93856
sps	97	106	IKNNVAGEAL	1028.57	4.98178	TTd-8E1-1H1	0	0	0
sps	97	106	IKNNVAGEAL	1028.57	4.97715	TTd-8E1-1H1	10	0.956864	0.155475
sps	97	106	IKNNVAGEAL	1028.57	4.97628	TTd-8E1-1H1	30	0.940959	0.140939	1.89782	0.040732	0.466425
sps	101	107	VAGEALL	672.393	6.51929	TTd	0	0	0
sps	101	107	VAGEALL	672.393	6.51453	TTd	10	0.134918	0.02841
sps	101	107	VAGEALL	672.393	6.50871	TTd	30	0.138361	0.025085	0.273279
sps	101	107	VAGEALL	672.393	6.51929	TTd-8E1-1H1	0	0	0
sps	101	107	VAGEALL	672.393	6.51314	TTd-8E1-1H1	10	0.136797	0.024939
sps	101	107	VAGEALL	672.393	6.51005	TTd-8E1-1H1	30	0.123435	0.019747	0.260232	0.013047	0.08523
sps	107	120	LDKIINAIPYLGNS	1530.85	6.9467	TTd	0	0	0
sps	107	120	LDKIINAIPYLGNS	1530.85	6.95074	TTd	10	0.841487	0.12008
sps	107	120	LDKIINAIPYLGNS	1530.85	6.9421	TTd	30	0.999013	0.01089	1.8405
sps	107	120	LDKIINAIPYLGNS	1530.85	6.9467	TTd-8E1-1H1	0	0	0
sps	107	120	LDKIINAIPYLGNS	1530.85	6.94367	TTd-8E1-1H1	10	0.887989	0.024236
sps	107	120	LDKIINAIPYLGNS	1530.85	6.94406	TTd-8E1-1H1	30	0.971989	0.047096	1.85998	-0.019478	0.36024
sps	108	120	DKIINAIPYLGNS	1417.77	6.82471	TTd	0	0	0
sps	108	120	DKIINAIPYLGNS	1417.77	6.82395	TTd	10	0.812959	0.11797
sps	108	120	DKIINAIPYLGNS	1417.77	6.8161	TTd	30	1.01386	0.018765	1.82682
sps	108	120	DKIINAIPYLGNS	1417.77	6.82471	TTd-8E1-1H1	0	0	0
sps	108	120	DKIINAIPYLGNS	1417.77	6.81946	TTd-8E1-1H1	10	0.836458	0.046472
sps	108	120	DKIINAIPYLGNS	1417.77	6.81934	TTd-8E1-1H1	30	0.860413	0.051885	1.69687	0.129951	0.35391
sps	113	119	AIPYLGN	747.404	6.49589	TTd	0	0	0
sps	113	119	AIPYLGN	747.404	6.48915	TTd	10	0.350135	0.087172
sps	113	119	AIPYLGN	747.404	6.48496	TTd	30	0.450273	0.047893	0.800408
sps	113	119	AIPYLGN	747.404	6.49589	TTd-8E1-1H1	0	0	0
sps	113	119	AIPYLGN	747.404	6.48721	TTd-8E1-1H1	10	0.339137	0.048161
sps	113	119	AIPYLGN	747.404	6.48592	TTd-8E1-1H1	30	0.338726	0.049464	0.677863	0.122545	0.261516
sps	113	120	AIPYLGNS	834.436	6.45345	TTd	0	0	0
sps	113	120	AIPYLGNS	834.436	6.44608	TTd	10	0.666188	0.089666
sps	113	120	AIPYLGNS	834.436	6.44191	TTd	30	0.783073	0.017124	1.44926
sps	113	120	AIPYLGNS	834.436	6.45345	TTd-8E1-1H1	0	0	0
sps	113	120	AIPYLGNS	834.436	6.44529	TTd-8E1-1H1	10	0.699271	0.022195
sps	113	120	AIPYLGNS	834.436	6.44306	TTd-8E1-1H1	30	0.731732	0.074073	1.431	0.018258	0.268998
sps	125	136	DKFDTNSNSVSF	1360.6	6.03167	TTd	0	0	0
sps	125	136	DKFDTNSNSVSF	1360.6	6.0275	TTd	10	1.13177	0.138753
sps	125	136	DKFDTNSNSVSF	1360.6	6.02446	TTd	30	1.33126	0.039984	2.46304
sps	125	136	DKFDTNSNSVSF	1360.6	6.03167	TTd-8E1-1H1	0	0	0
sps	125	136	DKFDTNSNSVSF	1360.6	6.02755	TTd-8E1-1H1	10	1.21634	0.068349
sps	125	136	DKFDTNSNSVSF	1360.6	6.03	TTd-8E1-1H1	30	1.27459	0.048924	2.49093	-0.027894	0.416259
sps	125	138	DKFDTNSNSVSFNL	1587.73	6.75476	TTd	0	0	0
sps	125	138	DKFDTNSNSVSFNL	1587.73	6.75813	TTd	10	1.23994	0.188616
sps	125	138	DKFDTNSNSVSFNL	1587.73	6.74704	TTd	30	1.58056	0.076071	2.8205
sps	125	138	DKFDTNSNSVSFNL	1587.73	6.75476	TTd-8E1-1H1	0	0	0
sps	125	138	DKFDTNSNSVSFNL	1587.73	6.75568	TTd-8E1-1H1	10	1.45314	0.039977
sps	125	138	DKFDTNSNSVSFNL	1587.73	6.74575	TTd-8E1-1H1	30	1.5981	0.01845	3.05124	-0.23075	0.565848
sps	137	152	NLLEQDPSGATTKSAM	1662.8	5.59427	TTd	0	0	0
sps	137	152	NLLEQDPSGATTKSAM	1662.8	5.5906	TTd	10	4.05138	0.171058
sps	137	152	NLLEQDPSGATTKSAM	1662.8	5.58793	TTd	30	4.52041	0.064149	8.57179
sps	137	152	NLLEQDPSGATTKSAM	1662.8	5.59427	TTd-8E1-1H1	0	0	0
sps	137	152	NLLEQDPSGATTKSAM	1662.8	5.58748	TTd-8E1-1H1	10	4.23443	0.04857
sps	137	152	NLLEQDPSGATTKSAM	1662.8	5.58563	TTd-8E1-1H1	30	4.44272	0.085873	8.67715	-0.105359	0.513174
sps	137	153	NLLEQDPSGATTKSAML	1775.88	6.52464	TTd	0	0	0
sps	137	153	NLLEQDPSGATTKSAML	1775.88	6.51779	TTd	10	4.11377	0.453914
sps	137	153	NLLEQDPSGATTKSAML	1775.88	6.51305	TTd	30	4.66784	0.037377	8.78161
sps	137	153	NLLEQDPSGATTKSAML	1775.88	6.52464	TTd-8E1-1H1	0	0	0
sps	137	153	NLLEQDPSGATTKSAML	1775.88	6.5141	TTd-8E1-1H1	10	4.4375	0.055076
sps	137	153	NLLEQDPSGATTKSAML	1775.88	6.51533	TTd-8E1-1H1	30	4.74754	0.04313	9.18505	-0.403438	1.36174
sps	139	152	LEQDPSGATTKSAM	1435.67	4.5976	TTd	0	0	0
sps	139	152	LEQDPSGATTKSAM	1435.67	4.60077	TTd	10	3.68282	0.086067
sps	139	152	LEQDPSGATTKSAM	1435.67	4.59611	TTd	30	3.92938	0.061872	7.6122
sps	139	152	LEQDPSGATTKSAM	1435.67	4.5976	TTd-8E1-1H1	0	0	0
sps	139	152	LEQDPSGATTKSAM	1435.67	4.60123	TTd-8E1-1H1	10	3.87512	0.035481
sps	139	152	LEQDPSGATTKSAM	1435.67	4.59602	TTd-8E1-1H1	30	4.03092	0.03711	7.90604	-0.293839	0.258201
sps	140	152	EQDPSGATTKSAM	1322.59	4.25865	TTd	0	0	0
sps	140	152	EQDPSGATTKSAM	1322.59	4.27458	TTd	10	2.79455	0.211347
sps	140	152	EQDPSGATTKSAM	1322.59	4.2692	TTd	30	3.06656	0.18293	5.86111
sps	140	152	EQDPSGATTKSAM	1322.59	4.25865	TTd-8E1-1H1	0	0	0
sps	140	152	EQDPSGATTKSAM	1322.59	4.27244	TTd-8E1-1H1	10	3.07279	0.167125
sps	140	152	EQDPSGATTKSAM	1322.59	4.27303	TTd-8E1-1H1	30	3.08145	0.22719	6.15424	-0.293132	0.68157
sps	140	153	EQDPSGATTKSAML	1435.67	5.12529	TTd	0	0	0
sps	140	153	EQDPSGATTKSAML	1435.67	5.11928	TTd	10	2.97474	0.086109
sps	140	153	EQDPSGATTKSAML	1435.67	5.11057	TTd	30	3.28512	0.028867	6.25985
sps	140	153	EQDPSGATTKSAML	1435.67	5.12529	TTd-8E1-1H1	0	0	0
sps	140	153	EQDPSGATTKSAML	1435.67	5.11982	TTd-8E1-1H1	10	2.99001	0.054767
sps	140	153	EQDPSGATTKSAML	1435.67	5.11517	TTd-8E1-1H1	30	3.17699	0.096698	6.167	0.092852	0.290094
sps	140	156	EQDPSGATTKSAMLTNL	1763.85	6.08166	TTd	0	0	0
sps	140	156	EQDPSGATTKSAMLTNL	1763.85	6.07952	TTd	10	2.91301	0.08761
sps	140	156	EQDPSGATTKSAMLTNL	1763.85	6.07134	TTd	30	3.14871	0.080459	6.06171
sps	140	156	EQDPSGATTKSAMLTNL	1763.85	6.08166	TTd-8E1-1H1	0	0	0
sps	140	156	EQDPSGATTKSAMLTNL	1763.85	6.07771	TTd-8E1-1H1	10	2.96997	0.069116
sps	140	156	EQDPSGATTKSAMLTNL	1763.85	6.07661	TTd-8E1-1H1	30	3.07605	0.085861	6.04602	0.015698	0.26283
sps	157	165	IIFGPGPVL	912.555	7.81032	TTd	0	0	0
sps	157	165	IIFGPGPVL	912.555	7.81265	TTd	10	0.196905	0.014618
sps	157	165	IIFGPGPVL	912.555	7.80299	TTd	30	0.254322	0.017584	0.451227
sps	157	165	IIFGPGPVL	912.555	7.81032	TTd-8E1-1H1	0	0	0
sps	157	165	IIFGPGPVL	912.555	7.81335	TTd-8E1-1H1	10	0.188241	0.050424
sps	157	165	IIFGPGPVL	912.555	7.80434	TTd-8E1-1H1	30	0.271306	0.027038	0.459547	-0.00832	0.151272
sps	157	167	IIFGPGPVLNK	1154.69	6.14037	TTd	0	0	0
sps	157	167	IIFGPGPVLNK	1154.69	6.14298	TTd	10	0.163881	0.173106
sps	157	167	IIFGPGPVLNK	1154.69	6.13533	TTd	30	0.342107	0.199131	0.505988
sps	157	167	IIFGPGPVLNK	1154.69	6.14037	TTd-8E1-1H1	0	0	0
sps	157	167	IIFGPGPVLNK	1154.69	6.14055	TTd-8E1-1H1	10	0.219147	0.163097
sps	157	167	IIFGPGPVLNK	1154.69	6.13691	TTd-8E1-1H1	30	0.270197	0.168447	0.489344	0.016644	0.597393
sps	157	168	IIFGPGPVLNKN	1268.74	6.06219	TTd	0	0	0
sps	157	168	IIFGPGPVLNKN	1268.74	6.06484	TTd	10	0.551013	0.046338
sps	157	168	IIFGPGPVLNKN	1268.74	6.05706	TTd	30	0.720636	0.025677	1.27165
sps	157	168	IIFGPGPVLNKN	1268.74	6.06219	TTd-8E1-1H1	0	0	0
sps	157	168	IIFGPGPVLNKN	1268.74	6.06305	TTd-8E1-1H1	10	0.582712	0.01976
sps	157	168	IIFGPGPVLNKN	1268.74	6.05957	TTd-8E1-1H1	30	0.545397	0.055071	1.12811	0.14354	0.165213
sps	157	172	IIFGPGPVLNKNEVRG	1709.97	5.71362	TTd	0	0	0
sps	157	172	IIFGPGPVLNKNEVRG	1709.97	5.71254	TTd	10	2.08028	0.159979
sps	157	172	IIFGPGPVLNKNEVRG	1709.97	5.70866	TTd	30	2.32381	0.150462	4.40409
sps	157	172	IIFGPGPVLNKNEVRG	1709.97	5.71362	TTd-8E1-1H1	0	0	0
sps	157	172	IIFGPGPVLNKNEVRG	1709.97	5.71053	TTd-8E1-1H1	10	2.16816	0.148244
sps	157	172	IIFGPGPVLNKNEVRG	1709.97	5.70864	TTd-8E1-1H1	30	2.29759	0.136769	4.46575	-0.06166	0.479937
sps	157	175	IIFGPGPVLNKNEVRGIVL	2035.21	6.80723	TTd	0	0	0
sps	157	175	IIFGPGPVLNKNEVRGIVL	2035.21	6.81077	TTd	10	2.0893	0.190294
sps	157	175	IIFGPGPVLNKNEVRGIVL	2035.21	6.79777	TTd	30	2.3222	0.157214	4.41151
sps	157	175	IIFGPGPVLNKNEVRGIVL	2035.21	6.80723	TTd-8E1-1H1	0	0	0
sps	157	175	IIFGPGPVLNKNEVRGIVL	2035.21	6.80362	TTd-8E1-1H1	10	2.20833	0.163896
sps	157	175	IIFGPGPVLNKNEVRGIVL	2035.21	6.80039	TTd-8E1-1H1	30	2.29672	0.16128	4.50505	-0.093549	0.570882
sps	168	175	NEVRGIVL	899.531	5.83718	TTd	0	0	0
sps	168	175	NEVRGIVL	899.531	5.83939	TTd	10	1.23545	0.025695
sps	168	175	NEVRGIVL	899.531	5.83188	TTd	30	1.28306	0.039196	2.51851
sps	168	175	NEVRGIVL	899.531	5.83718	TTd-8E1-1H1	0	0	0
sps	168	175	NEVRGIVL	899.531	5.83841	TTd-8E1-1H1	10	1.24023	0.025839
sps	168	175	NEVRGIVL	899.531	5.83419	TTd-8E1-1H1	30	1.27245	0.037419	2.51268	0.005827	0.117588
sps	169	175	EVRGIVL	785.488	5.85189	TTd	0	0	0
sps	169	175	EVRGIVL	785.488	5.85534	TTd	10	0.638585	0.068343
sps	169	175	EVRGIVL	785.488	5.84764	TTd	30	0.681031	0.073487	1.31962
sps	169	175	EVRGIVL	785.488	5.85189	TTd-8E1-1H1	0	0	0
sps	169	175	EVRGIVL	785.488	5.85436	TTd-8E1-1H1	10	0.58374	0.026917
sps	169	175	EVRGIVL	785.488	5.84914	TTd-8E1-1H1	30	0.638302	0.093661	1.22204	0.097574	0.280983
sps	179	194	NKNYFPCRDGFGSIMQ	1876.85	6.34895	TTd	0	0	0
sps	179	194	NKNYFPCRDGFGSIMQ	1876.85	6.34404	TTd	10	1.08984	0.182473
sps	179	194	NKNYFPCRDGFGSIMQ	1876.85	6.33533	TTd	30	1.37397	0.071126	2.46381
sps	179	194	NKNYFPCRDGFGSIMQ	1876.85	6.34895	TTd-8E1-1H1	0	0	0
sps	179	194	NKNYFPCRDGFGSIMQ	1876.85	6.3408	TTd-8E1-1H1	10	1.17553	0.073561
sps	179	194	NKNYFPCRDGFGSIMQ	1876.85	6.3388	TTd-8E1-1H1	30	1.23568	0.105795	2.41121	0.052604	0.547419
sps	179	195	NKNYFPCRDGFGSIMQM	2007.89	6.88023	TTd	0	0	0
sps	179	195	NKNYFPCRDGFGSIMQM	2007.89	6.887	TTd	10	1.03882	0.163532
sps	179	195	NKNYFPCRDGFGSIMQM	2007.89	6.87389	TTd	30	1.25253	0.110445	2.29134
sps	179	195	NKNYFPCRDGFGSIMQM	2007.89	6.88023	TTd-8E1-1H1	0	0	0
sps	179	195	NKNYFPCRDGFGSIMQM	2007.89	6.88019	TTd-8E1-1H1	10	1.13026	0.122358
sps	179	195	NKNYFPCRDGFGSIMQM	2007.89	6.87715	TTd-8E1-1H1	30	1.23802	0.120561	2.36828	-0.07694	0.490596
sps	182	189	YFPCRDGF	1004.43	6.26089	TTd	0	0	0
sps	182	189	YFPCRDGF	1004.43	6.26035	TTd	10	0.280966	0.101696
sps	182	189	YFPCRDGF	1004.43	6.25481	TTd	30	0.439647	0.075312	0.720613
sps	182	189	YFPCRDGF	1004.43	6.26089	TTd-8E1-1H1	0	0	0
sps	182	189	YFPCRDGF	1004.43	6.26006	TTd-8E1-1H1	10	0.297125	0.01965
sps	182	189	YFPCRDGF	1004.43	6.25687	TTd-8E1-1H1	30	0.411932	0.126469	0.709057	0.011556	0.379407
sps	182	194	YFPCRDGFGSIMQ	1520.67	6.81777	TTd	0	0	0
sps	182	194	YFPCRDGFGSIMQ	1520.67	6.81922	TTd	10	0.432058	0.044531
sps	182	194	YFPCRDGFGSIMQ	1520.67	6.80957	TTd	30	0.514557	0.042347	0.946615
sps	182	194	YFPCRDGFGSIMQ	1520.67	6.81777	TTd-8E1-1H1	0	0	0
sps	182	194	YFPCRDGFGSIMQ	1520.67	6.8146	TTd-8E1-1H1	10	0.38989	0.065232
sps	182	194	YFPCRDGFGSIMQ	1520.67	6.81274	TTd-8E1-1H1	30	0.429017	0.072154	0.818907	0.127708	0.216462
sps	182	195	YFPCRDGFGSIMQM	1651.71	7.43213	TTd	0	0	0
sps	182	195	YFPCRDGFGSIMQM	1651.71	7.43464	TTd	10	0.519851	0.065574
sps	182	195	YFPCRDGFGSIMQM	1651.71	7.42317	TTd	30	0.542251	0.036736	1.0621
sps	182	195	YFPCRDGFGSIMQM	1651.71	7.43213	TTd-8E1-1H1	0	0	0
sps	182	195	YFPCRDGFGSIMQM	1651.71	7.43413	TTd-8E1-1H1	10	0.477184	0.041293
sps	182	195	YFPCRDGFGSIMQM	1651.71	7.42633	TTd-8E1-1H1	30	0.517944	0.044706	0.995128	0.066974	0.196722
sps	187	194	DGFGSIMQ	854.371	7.11009	TTd	0	0	0
sps	187	194	DGFGSIMQ	854.371	7.10907	TTd	10	0.127697	0.039126
sps	187	194	DGFGSIMQ	854.371	7.1055	TTd	30	0.142463	0.021161	0.27016
sps	187	194	DGFGSIMQ	854.371	7.11009	TTd-8E1-1H1	0	0	0
sps	187	194	DGFGSIMQ	854.371	7.10612	TTd-8E1-1H1	10	0.108835	0.008028
sps	187	194	DGFGSIMQ	854.371	7.10609	TTd-8E1-1H1	30	0.06539	0.014616	0.174225	0.095935	0.117378
sps	196	205	AFCPEYVPTF	1173.53	7.86824	TTd	0	0	0
sps	196	205	AFCPEYVPTF	1173.53	7.86977	TTd	10	0.110671	0.051602
sps	196	205	AFCPEYVPTF	1173.53	7.85985	TTd	30	0.116891	0.05801	0.227562
sps	196	205	AFCPEYVPTF	1173.53	7.86824	TTd-8E1-1H1	0	0	0
sps	196	205	AFCPEYVPTF	1173.53	7.87687	TTd-8E1-1H1	10	0.088796	0.051718
sps	196	205	AFCPEYVPTF	1173.53	7.85939	TTd-8E1-1H1	30	0.150568	0.044884	0.239364	-0.011802	0.17403
sps	196	206	AFCPEYVPTFD	1288.56	7.63534	TTd	0	0	0
sps	196	206	AFCPEYVPTFD	1288.56	7.63636	TTd	10	0.30931	0.142053
sps	196	206	AFCPEYVPTFD	1288.56	7.62983	TTd	30	0.336498	0.150503	0.645808
sps	196	206	AFCPEYVPTFD	1288.56	7.63534	TTd-8E1-1H1	0	0	0
sps	196	206	AFCPEYVPTFD	1288.56	7.63752	TTd-8E1-1H1	10	0.377693	0.261597
sps	196	206	AFCPEYVPTFD	1288.56	7.63258	TTd-8E1-1H1	30	0.30235	0.355164	0.680043	-0.034235	1.06549
sps	196	208	AFCPEYVPTFDNV	1501.67	7.80722	TTd	0	0	0
sps	196	208	AFCPEYVPTFDNV	1501.67	7.80618	TTd	10	1.17197	0.096819
sps	196	208	AFCPEYVPTFDNV	1501.67	7.79829	TTd	30	1.29825	0.029002	2.47023
sps	196	208	AFCPEYVPTFDNV	1501.67	7.80722	TTd-8E1-1H1	0	0	0
sps	196	208	AFCPEYVPTFDNV	1501.67	7.81024	TTd-8E1-1H1	10	1.19017	0.014926
sps	196	208	AFCPEYVPTFDNV	1501.67	7.79956	TTd-8E1-1H1	30	1.21398	0.11431	2.40414	0.066084	0.34293
sps	196	210	AFCPEYVPTFDNVIE	1743.79	8.00694	TTd	0	0	0
sps	196	210	AFCPEYVPTFDNVIE	1743.79	8.00043	TTd	10	2.13695	0.171212
sps	196	210	AFCPEYVPTFDNVIE	1743.79	7.99078	TTd	30	2.27574	0.034221	4.41269
sps	196	210	AFCPEYVPTFDNVIE	1743.79	8.00694	TTd-8E1-1H1	0	0	0
sps	196	210	AFCPEYVPTFDNVIE	1743.79	8.00785	TTd-8E1-1H1	10	2.26459	0.026159
sps	196	210	AFCPEYVPTFDNVIE	1743.79	7.9909	TTd-8E1-1H1	30	2.29224	0.036887	4.55683	-0.144142	0.513636
sps	207	214	NVIENITS	889.462	6.20295	TTd	0	0	0
sps	207	214	NVIENITS	889.462	6.17681	TTd	10	3.73388	0.065818
sps	207	214	NVIENITS	889.462	6.17406	TTd	30	3.77474	0.03431	7.50862
sps	207	214	NVIENITS	889.462	6.20295	TTd-8E1-1H1	0	0	0
sps	207	214	NVIENITS	889.462	6.17856	TTd-8E1-1H1	10	3.7775	0.059192
sps	207	214	NVIENITS	889.462	6.17654	TTd-8E1-1H1	30	3.82202	0.033694	7.59951	-0.090893	0.197454
sps	207	215	NVIENITSL	1002.55	7.55415	TTd	0	0	0
sps	207	215	NVIENITSL	1002.55	7.52671	TTd	10	4.74001	0.238959
sps	207	215	NVIENITSL	1002.55	7.51844	TTd	30	4.75237	0.031452	9.49238
sps	207	215	NVIENITSL	1002.55	7.55415	TTd-8E1-1H1	0	0	0
sps	207	215	NVIENITSL	1002.55	7.52534	TTd-8E1-1H1	10	4.81696	0.060817
sps	207	215	NVIENITSL	1002.55	7.51856	TTd-8E1-1H1	30	4.75376	0.025123	9.57072	-0.078341	0.716877
sps	208	214	VIENITS	775.42	5.29833	TTd	0	0	0
sps	208	214	VIENITS	775.42	5.29226	TTd	10	2.80088	0.017161
sps	208	214	VIENITS	775.42	5.28823	TTd	30	2.79723	0.013925	5.59811
sps	208	214	VIENITS	775.42	5.29833	TTd-8E1-1H1	0	0	0
sps	208	214	VIENITS	775.42	5.29102	TTd-8E1-1H1	10	2.78018	0.055103
sps	208	214	VIENITS	775.42	5.29126	TTd-8E1-1H1	30	2.78713	0.026577	5.56731	0.030799	0.165309
sps	208	215	VIENITSL	888.504	6.82127	TTd	0	0	0
sps	208	215	VIENITSL	888.504	6.8139	TTd	10	3.56285	0.083081
sps	208	215	VIENITSL	888.504	6.80756	TTd	30	3.45275	0.081993	7.0156
sps	208	215	VIENITSL	888.504	6.82127	TTd-8E1-1H1	0	0	0
sps	208	215	VIENITSL	888.504	6.80952	TTd-8E1-1H1	10	3.41032	0.043
sps	208	215	VIENITSL	888.504	6.80959	TTd-8E1-1H1	30	3.45551	0.128376	6.86583	0.149775	0.385128
sps	216	229	TIGKSKYFQDPALL	1580.87	6.08265	TTd	0	0	0
sps	216	229	TIGKSKYFQDPALL	1580.87	6.08126	TTd	10	2.0965	0.096235
sps	216	229	TIGKSKYFQDPALL	1580.87	6.07503	TTd	30	2.07215	0.093207	4.16865
sps	216	229	TIGKSKYFQDPALL	1580.87	6.08265	TTd-8E1-1H1	0	0	0
sps	216	229	TIGKSKYFQDPALL	1580.87	6.07967	TTd-8E1-1H1	10	2.03086	0.243945
sps	216	229	TIGKSKYFQDPALL	1580.87	6.07869	TTd-8E1-1H1	30	2.00396	0.144514	4.03483	0.133819	0.731835
sps	222	228	YFQDPAL	853.409	6.87951	TTd	0	0	0
sps	222	228	YFQDPAL	853.409	6.87867	TTd	10	0.090789	0.087273
sps	222	228	YFQDPAL	853.409	6.87211	TTd	30	0.117001	0.067375	0.20779
sps	222	228	YFQDPAL	853.409	6.87951	TTd-8E1-1H1	0	0	0
sps	222	228	YFQDPAL	853.409	6.87705	TTd-8E1-1H1	10	0.012817	0.118348
sps	222	228	YFQDPAL	853.409	6.87464	TTd-8E1-1H1	30	-0.023976	0.064571	-0.011159	0.218949	0.355044
sps	223	229	FQDPALL	803.43	7.14213	TTd	0	0	0
sps	223	229	FQDPALL	803.43	7.14347	TTd	10	0.081058	0.029307
sps	223	229	FQDPALL	803.43	7.13673	TTd	30	0.049477	0.030795	0.130535
sps	223	229	FQDPALL	803.43	7.14213	TTd-8E1-1H1	0	0	0
sps	223	229	FQDPALL	803.43	7.13883	TTd-8E1-1H1	10	0.061313	0.019002
sps	223	229	FQDPALL	803.43	7.1405	TTd-8E1-1H1	30	0.069687	0.019961	0.131	-0.000465	0.092385
sps	230	236	LMHELIH	892.471	4.75712	TTd	0	0	0
sps	230	236	LMHELIH	892.471	4.7619	TTd	10	0.05479	0.019128
sps	230	236	LMHELIH	892.471	4.75594	TTd	30	0.04993	0.019294	0.10472
sps	230	236	LMHELIH	892.471	4.75712	TTd-8E1-1H1	0	0	0
sps	230	236	LMHELIH	892.471	4.76322	TTd-8E1-1H1	10	0.060592	0.061743
sps	230	236	LMHELIH	892.471	4.7615	TTd-8E1-1H1	30	0.019711	0.058854	0.080303	0.024417	0.185229
sps	237	245	VLHGLYGMQ	1017.52	5.91773	TTd	0	0	0
sps	237	245	VLHGLYGMQ	1017.52	5.9169	TTd	10	0.148393	0.011966
sps	237	245	VLHGLYGMQ	1017.52	5.91246	TTd	30	0.169245	0.041144	0.317638
sps	237	245	VLHGLYGMQ	1017.52	5.91773	TTd-8E1-1H1	0	0	0
sps	237	245	VLHGLYGMQ	1017.52	5.91776	TTd-8E1-1H1	10	0.16163	0.037189
sps	237	245	VLHGLYGMQ	1017.52	5.91554	TTd-8E1-1H1	30	0.206129	0.026482	0.367759	-0.050121	0.123432
sps	246	257	VSSHEIIPSKQE	1353.7	4.29164	TTd	0	0	0
sps	246	257	VSSHEIIPSKQE	1353.7	4.28412	TTd	10	1.3391	0.164211
sps	246	257	VSSHEIIPSKQE	1353.7	4.29845	TTd	30	1.54502	0.134941	2.88412
sps	246	257	VSSHEIIPSKQE	1353.7	4.29164	TTd-8E1-1H1	0	0	0
sps	246	257	VSSHEIIPSKQE	1353.7	4.28442	TTd-8E1-1H1	10	1.6315	0.151131
sps	246	257	VSSHEIIPSKQE	1353.7	4.31212	TTd-8E1-1H1	30	1.42265	0.214683	3.05415	-0.170031	0.644049
sps	249	257	HEIIPSKQE	1080.57	3.96739	TTd	0	0	0
sps	249	257	HEIIPSKQE	1080.57	3.92547	TTd	10	0.905349	0.078896
sps	249	257	HEIIPSKQE	1080.57	3.92326	TTd	30	1.34955	0.066209	2.25489
sps	249	257	HEIIPSKQE	1080.57	3.96739	TTd-8E1-1H1	0	0	0
sps	249	257	HEIIPSKQE	1080.57	3.93198	TTd-8E1-1H1	10	1.36904	0.059582
sps	249	257	HEIIPSKQE	1080.57	3.92883	TTd-8E1-1H1	30	1.3107	0.042651	2.67974	-0.424842	0.236688
sps	271	281	LFTFGGQDANL	1182.58	7.52892	TTd	0	0	0
sps	271	281	LFTFGGQDANL	1182.58	7.52849	TTd	10	1.8378	0.130508
sps	271	281	LFTFGGQDANL	1182.58	7.52061	TTd	30	2.01273	0.01094	3.85053
sps	271	281	LFTFGGQDANL	1182.58	7.52892	TTd-8E1-1H1	0	0	0
sps	271	281	LFTFGGQDANL	1182.58	7.5283	TTd-8E1-1H1	10	1.88379	0.018422
sps	271	281	LFTFGGQDANL	1182.58	7.52158	TTd-8E1-1H1	30	1.91023	0.058774	3.79401	0.056519	0.391524
sps	272	281	FTFGGQDANL	1069.49	7.0002	TTd	0	0	0
sps	272	281	FTFGGQDANL	1069.49	7.00083	TTd	10	1.53243	0.133981
sps	272	281	FTFGGQDANL	1069.49	6.99532	TTd	30	1.68889	0.101923	3.22131
sps	272	281	FTFGGQDANL	1069.49	7.0002	TTd-8E1-1H1	0	0	0
sps	272	281	FTFGGQDANL	1069.49	6.99672	TTd-8E1-1H1	10	1.51961	0.104895
sps	272	281	FTFGGQDANL	1069.49	6.99534	TTd-8E1-1H1	30	1.61445	0.088408	3.13407	0.087243	0.401943
sps	275	281	GGQDANL	674.31	4.77982	TTd	0	0	0
sps	275	281	GGQDANL	674.31	4.77909	TTd	10	1.00438	0.099717
sps	275	281	GGQDANL	674.31	4.77425	TTd	30	1.2143	0.029451	2.21868
sps	275	281	GGQDANL	674.31	4.77982	TTd-8E1-1H1	0	0	0
sps	275	281	GGQDANL	674.31	4.78009	TTd-8E1-1H1	10	1.14083	0.017687
sps	275	281	GGQDANL	674.31	4.77714	TTd-8E1-1H1	30	1.22971	0.015877	2.37054	-0.15186	0.299151
sps	282	289	ISIDIKND	917.494	5.40285	TTd	0	0	0
sps	282	289	ISIDIKND	917.494	5.40423	TTd	10	1.16291	0.177599
sps	282	289	ISIDIKND	917.494	5.3957	TTd	30	1.27062	0.120935	2.43353
sps	282	289	ISIDIKND	917.494	5.40285	TTd-8E1-1H1	0	0	0
sps	282	289	ISIDIKND	917.494	5.40478	TTd-8E1-1H1	10	1.25356	0.126142
sps	282	289	ISIDIKND	917.494	5.39909	TTd-8E1-1H1	30	1.21701	0.128007	2.47057	-0.037041	0.532797
sps	284	290	IDIKNDL	830.462	5.68446	TTd	0	0	0
sps	284	290	IDIKNDL	830.462	5.68413	TTd	10	0.228311	0.144398
sps	284	290	IDIKNDL	830.462	5.68121	TTd	30	0.292299	0.154112	0.52061
sps	284	290	IDIKNDL	830.462	5.68446	TTd-8E1-1H1	0	0	0
sps	284	290	IDIKNDL	830.462	5.68404	TTd-8E1-1H1	10	0.2427	0.120652
sps	284	290	IDIKNDL	830.462	5.68112	TTd-8E1-1H1	30	0.239905	0.130995	0.482605	0.038005	0.462336
sps	290	297	LYEKTLND	995.504	4.66799	TTd	0	0	0
sps	290	297	LYEKTLND	995.504	4.67436	TTd	10	0.281275	0.00871
sps	290	297	LYEKTLND	995.504	4.67009	TTd	30	0.286135	0.027625	0.56741
sps	290	297	LYEKTLND	995.504	4.66799	TTd-8E1-1H1	0	0	0
sps	290	297	LYEKTLND	995.504	4.67581	TTd-8E1-1H1	10	0.337375	0.014447
sps	290	297	LYEKTLND	995.504	4.67273	TTd-8E1-1H1	30	0.175781	0.059288	0.513156	0.054254	0.177864
sps	290	304	LYEKTLNDYKAIANK	1783.96	5.74205	TTd	0	0	0
sps	290	304	LYEKTLNDYKAIANK	1783.96	5.74172	TTd	10	0.313189	0.094233
sps	290	304	LYEKTLNDYKAIANK	1783.96	5.7371	TTd	30	0.329474	0.069612	0.642663
sps	290	304	LYEKTLNDYKAIANK	1783.96	5.74205	TTd-8E1-1H1	0	0	0
sps	290	304	LYEKTLNDYKAIANK	1783.96	5.74084	TTd-8E1-1H1	10	0.28675	0.107236
sps	290	304	LYEKTLNDYKAIANK	1783.96	5.73804	TTd-8E1-1H1	30	0.273121	0.104727	0.559871	0.082792	0.321708
sps	291	297	YEKTLND	882.42	4.13028	TTd	0	0	0
sps	291	297	YEKTLND	882.42	4.10636	TTd	10	0.235334	0.151279
sps	291	297	YEKTLND	882.42	4.11334	TTd	30	0.281275	0.168419	0.516609
sps	291	297	YEKTLND	882.42	4.13028	TTd-8E1-1H1	0	0	0
sps	291	297	YEKTLND	882.42	4.11027	TTd-8E1-1H1	10	0.290183	0.185909
sps	291	297	YEKTLND	882.42	4.12135	TTd-8E1-1H1	30	0.216251	0.175337	0.506434	0.010175	0.557727
sps	291	320	YEKTLNDYKAIANKLSQVTSCNDPNIDIDS	3372.63	6.82092	TTd	0	0	0
sps	291	320	YEKTLNDYKAIANKLSQVTSCNDPNIDIDS	3372.63	6.81959	TTd	10	4.56823	0.332405
sps	291	320	YEKTLNDYKAIANKLSQVTSCNDPNIDIDS	3372.63	6.80852	TTd	30	5.33404	0.145911	9.90227
sps	291	320	YEKTLNDYKAIANKLSQVTSCNDPNIDIDS	3372.63	6.82092	TTd-8E1-1H1	0	0	0
sps	291	320	YEKTLNDYKAIANKLSQVTSCNDPNIDIDS	3372.63	6.81202	TTd-8E1-1H1	10	4.9974	0.098763
sps	291	320	YEKTLNDYKAIANKLSQVTSCNDPNIDIDS	3372.63	6.81042	TTd-8E1-1H1	30	5.22538	0.140206	10.2228	-0.320517	0.997215
sps	298	320	YKAIANKLSQVTSCNDPNIDIDS	2509.22	5.94622	TTd	0	0	0
sps	298	320	YKAIANKLSQVTSCNDPNIDIDS	2509.22	5.94093	TTd	10	4.22056	0.386917
sps	298	320	YKAIANKLSQVTSCNDPNIDIDS	2509.22	5.93477	TTd	30	4.83108	0.20296	9.05164
sps	298	320	YKAIANKLSQVTSCNDPNIDIDS	2509.22	5.94622	TTd-8E1-1H1	0	0	0
sps	298	320	YKAIANKLSQVTSCNDPNIDIDS	2509.22	5.9337	TTd-8E1-1H1	10	4.54418	0.146936
sps	298	320	YKAIANKLSQVTSCNDPNIDIDS	2509.22	5.93707	TTd-8E1-1H1	30	4.91113	0.141611	9.45531	-0.403671	1.16075
sps	301	320	IANKLSQVTSCNDPNIDIDS	2147.03	6.01419	TTd	0	0	0
sps	301	320	IANKLSQVTSCNDPNIDIDS	2147.03	6.0047	TTd	10	4.44047	0.338334
sps	301	320	IANKLSQVTSCNDPNIDIDS	2147.03	6.00084	TTd	30	5.04093	0.091218	9.4814
sps	301	320	IANKLSQVTSCNDPNIDIDS	2147.03	6.01419	TTd-8E1-1H1	0	0	0
sps	301	320	IANKLSQVTSCNDPNIDIDS	2147.03	6.00322	TTd-8E1-1H1	10	4.59311	0.096886
sps	301	320	IANKLSQVTSCNDPNIDIDS	2147.03	6.00151	TTd-8E1-1H1	30	4.89825	0.161068	9.49137	-0.009963	1.015
sps	304	317	KLSQVTSCNDPNID	1533.72	5.14054	TTd	0	0	0
sps	304	317	KLSQVTSCNDPNID	1533.72	5.1329	TTd	10	2.94693	0.260415
sps	304	317	KLSQVTSCNDPNID	1533.72	5.12763	TTd	30	3.46471	0.092604	6.41164
sps	304	317	KLSQVTSCNDPNID	1533.72	5.14054	TTd-8E1-1H1	0	0	0
sps	304	317	KLSQVTSCNDPNID	1533.72	5.13381	TTd-8E1-1H1	10	3.56088	0.157845
sps	304	317	KLSQVTSCNDPNID	1533.72	5.13047	TTd-8E1-1H1	30	3.59455	0.171896	7.15543	-0.743787	0.781245
sps	304	320	KLSQVTSCNDPNIDIDS	1848.86	5.69155	TTd	0	0	0
sps	304	320	KLSQVTSCNDPNIDIDS	1848.86	5.68655	TTd	10	3.7549	0.313722
sps	304	320	KLSQVTSCNDPNIDIDS	1848.86	5.68619	TTd	30	4.24455	0.087665	7.99945
sps	304	320	KLSQVTSCNDPNIDIDS	1848.86	5.69155	TTd-8E1-1H1	0	0	0
sps	304	320	KLSQVTSCNDPNIDIDS	1848.86	5.68621	TTd-8E1-1H1	10	3.92415	0.062495
sps	304	320	KLSQVTSCNDPNIDIDS	1848.86	5.68365	TTd-8E1-1H1	30	4.21366	0.099337	8.13781	-0.138366	0.941166
sps	306	320	SQVTSCNDPNIDIDS	1607.69	6.01598	TTd	0	0	0
sps	306	320	SQVTSCNDPNIDIDS	1607.69	6.00777	TTd	10	3.41936	0.14565
sps	306	320	SQVTSCNDPNIDIDS	1607.69	6.00535	TTd	30	3.74602	0.101588	7.16538
sps	306	320	SQVTSCNDPNIDIDS	1607.69	6.01598	TTd-8E1-1H1	0	0	0
sps	306	320	SQVTSCNDPNIDIDS	1607.69	6.00559	TTd-8E1-1H1	10	3.43821	0.031532
sps	306	320	SQVTSCNDPNIDIDS	1607.69	6.00333	TTd-8E1-1H1	30	3.43147	0.119404	6.86968	0.295693	0.43695
sps	321	331	YKQIYQQKYQF	1536.78	5.55417	TTd	0	0	0
sps	321	331	YKQIYQQKYQF	1536.78	5.5528	TTd	10	0.399909	0.080797
sps	321	331	YKQIYQQKYQF	1536.78	5.55247	TTd	30	0.50908	0.044423	0.908989
sps	321	331	YKQIYQQKYQF	1536.78	5.55417	TTd-8E1-1H1	0	0	0
sps	321	331	YKQIYQQKYQF	1536.78	5.55375	TTd-8E1-1H1	10	0.464714	0.039312
sps	321	331	YKQIYQQKYQF	1536.78	5.55178	TTd-8E1-1H1	30	0.502106	0.05756	0.96682	-0.057831	0.242391
sps	321	339	YKQIYQQKYQFDKDSNGQY	2444.15	5.26292	TTd	0	0	0
sps	321	339	YKQIYQQKYQFDKDSNGQY	2444.15	5.25954	TTd	10	1.70995	0.188359
sps	321	339	YKQIYQQKYQFDKDSNGQY	2444.15	5.2546	TTd	30	2.10762	0.154657	3.81758
sps	321	339	YKQIYQQKYQFDKDSNGQY	2444.15	5.26292	TTd-8E1-1H1	0	0	0
sps	321	339	YKQIYQQKYQFDKDSNGQY	2444.15	5.25939	TTd-8E1-1H1	10	1.83949	0.108335
sps	321	339	YKQIYQQKYQFDKDSNGQY	2444.15	5.25902	TTd-8E1-1H1	30	2.16666	0.120556	4.00615	-0.188572	0.565077
sps	321	343	YKQIYQQKYQFDKDSNGQYIVNE	2899.39	5.60723	TTd	0	0	0
sps	321	343	YKQIYQQKYQFDKDSNGQYIVNE	2899.39	5.607	TTd	10	3.06426	0.443506
sps	321	343	YKQIYQQKYQFDKDSNGQYIVNE	2899.39	5.60489	TTd	30	3.81845	0.110266	6.88271
sps	321	343	YKQIYQQKYQFDKDSNGQYIVNE	2899.39	5.60805	TTd-8E1-1H1	0	0	0
sps	321	343	YKQIYQQKYQFDKDSNGQYIVNE	2899.39	5.60501	TTd-8E1-1H1	10	3.27412	0.130869
sps	321	343	YKQIYQQKYQFDKDSNGQYIVNE	2899.39	5.60269	TTd-8E1-1H1	30	3.70323	0.15505	6.97735	-0.094636	1.33052
sps	321	346	YKQIYQQKYQFDKDSNGQYIVNEDKF	3289.58	5.80677	TTd	0	0	0
sps	321	346	YKQIYQQKYQFDKDSNGQYIVNEDKF	3289.58	5.80768	TTd	10	3.07316	0.413453
sps	321	346	YKQIYQQKYQFDKDSNGQYIVNEDKF	3289.58	5.80109	TTd	30	3.8669	0.084081	6.94006
sps	321	346	YKQIYQQKYQFDKDSNGQYIVNEDKF	3289.58	5.80677	TTd-8E1-1H1	0	0	0
sps	321	346	YKQIYQQKYQFDKDSNGQYIVNEDKF	3289.58	5.8053	TTd-8E1-1H1	10	3.38431	0.11422
sps	321	346	YKQIYQQKYQFDKDSNGQYIVNEDKF	3289.58	5.80152	TTd-8E1-1H1	30	3.84345	0.26247	7.22776	-0.287697	1.24036
sps	324	331	IYQQKYQF	1117.57	5.698	TTd	0	0	0
sps	324	331	IYQQKYQF	1117.57	5.69668	TTd	10	0.262737	0.040043
sps	324	331	IYQQKYQF	1117.57	5.69406	TTd	30	0.268754	0.015574	0.531491
sps	324	331	IYQQKYQF	1117.57	5.698	TTd-8E1-1H1	0	0	0
sps	324	331	IYQQKYQF	1117.57	5.69816	TTd-8E1-1H1	10	0.225591	0.03259
sps	324	331	IYQQKYQF	1117.57	5.69539	TTd-8E1-1H1	30	0.151582	0.054869	0.377173	0.154318	0.164607
sps	332	343	DKDSNGQYIVNE	1381.62	5.18825	TTd	0	0	0
sps	332	343	DKDSNGQYIVNE	1381.62	5.18761	TTd	10	2.36176	0.363059
sps	332	343	DKDSNGQYIVNE	1381.62	5.17852	TTd	30	2.79545	0.058457	5.15721
sps	332	343	DKDSNGQYIVNE	1381.62	5.18825	TTd-8E1-1H1	0	0	0
sps	332	343	DKDSNGQYIVNE	1381.62	5.18565	TTd-8E1-1H1	10	2.51625	0.068103
sps	332	343	DKDSNGQYIVNE	1381.62	5.18013	TTd-8E1-1H1	30	2.87543	0.130067	5.39168	-0.234468	1.08918
sps	332	346	DKDSNGQYIVNEDKF	1771.81	5.72053	TTd	0	0	0
sps	332	346	DKDSNGQYIVNEDKF	1771.81	5.7188	TTd	10	2.48753	0.233169
sps	332	346	DKDSNGQYIVNEDKF	1771.81	5.7134	TTd	30	3.01509	0.112669	5.50262
sps	332	346	DKDSNGQYIVNEDKF	1771.81	5.72053	TTd-8E1-1H1	0	0	0
sps	332	346	DKDSNGQYIVNEDKF	1771.81	5.7168	TTd-8E1-1H1	10	2.71951	0.08911
sps	332	346	DKDSNGQYIVNEDKF	1771.81	5.71291	TTd-8E1-1H1	30	3.01349	0.10574	5.733	-0.230382	0.699507
sps	332	349	DKDSNGQYIVNEDKFQIL	2126.04	6.72689	TTd	0	0	0
sps	332	349	DKDSNGQYIVNEDKFQIL	2126.04	6.72789	TTd	10	2.21599	0.357842
sps	332	349	DKDSNGQYIVNEDKFQIL	2126.04	6.71756	TTd	30	2.93116	0.088972	5.14714
sps	332	349	DKDSNGQYIVNEDKFQIL	2126.04	6.72689	TTd-8E1-1H1	0	0	0
sps	332	349	DKDSNGQYIVNEDKFQIL	2126.04	6.72176	TTd-8E1-1H1	10	2.59278	0.111591
sps	332	349	DKDSNGQYIVNEDKFQIL	2126.04	6.72076	TTd-8E1-1H1	30	2.91363	0.33528	5.50641	-0.359263	1.07353
sps	339	346	YIVNEDKF	1027.51	5.79907	TTd	0	0	0
sps	339	346	YIVNEDKF	1027.51	5.79809	TTd	10	1.18643	0.196159
sps	339	346	YIVNEDKF	1027.51	5.79322	TTd	30	1.42925	0.079674	2.61568
sps	339	346	YIVNEDKF	1027.51	5.79907	TTd-8E1-1H1	0	0	0
sps	339	346	YIVNEDKF	1027.51	5.79763	TTd-8E1-1H1	10	1.32902	0.116965
sps	339	346	YIVNEDKF	1027.51	5.79424	TTd-8E1-1H1	30	1.46397	0.145846	2.793	-0.177316	0.588477
sps	340	346	IVNEDKF	864.446	5.02285	TTd	0	0	0
sps	340	346	IVNEDKF	864.446	5.01466	TTd	10	0.742638	0.177614
sps	340	346	IVNEDKF	864.446	5.01112	TTd	30	0.96269	0.13229	1.70533
sps	340	346	IVNEDKF	864.446	5.02285	TTd-8E1-1H1	0	0	0
sps	340	346	IVNEDKF	864.446	5.01957	TTd-8E1-1H1	10	0.867635	0.134264
sps	340	346	IVNEDKF	864.446	5.01403	TTd-8E1-1H1	30	0.949098	0.152427	1.81673	-0.111405	0.532842
sps	340	349	IVNEDKFQIL	1218.67	6.60435	TTd	0	0	0
sps	340	349	IVNEDKFQIL	1218.67	6.60683	TTd	10	0.736267	0.048544
sps	340	349	IVNEDKFQIL	1218.67	6.59493	TTd	30	0.891499	0.096795	1.62777
sps	340	349	IVNEDKFQIL	1218.67	6.60435	TTd-8E1-1H1	0	0	0
sps	340	349	IVNEDKFQIL	1218.67	6.60209	TTd-8E1-1H1	10	0.729677	0.061271
sps	340	349	IVNEDKFQIL	1218.67	6.59905	TTd-8E1-1H1	30	0.942592	0.088349	1.67227	-0.044503	0.290385
sps	343	349	EDKFQIL	892.477	6.46591	TTd	0	0	0
sps	343	349	EDKFQIL	892.477	6.4643	TTd	10	0.079314	0.04936
sps	343	349	EDKFQIL	892.477	6.45582	TTd	30	0.143445	0.016704	0.222759
sps	343	349	EDKFQIL	892.477	6.46591	TTd-8E1-1H1	0	0	0
sps	343	349	EDKFQIL	892.477	6.46223	TTd-8E1-1H1	10	0.080075	0.033755
sps	343	349	EDKFQIL	892.477	6.45921	TTd-8E1-1H1	30	0.117201	0.043916	0.197276	0.025483	0.14808
sps	344	354	DKFQILYNSIM	1371.7	7.6405	TTd	0	0	0
sps	344	354	DKFQILYNSIM	1371.7	7.64844	TTd	10	0.18948	0.048922
sps	344	354	DKFQILYNSIM	1371.7	7.63766	TTd	30	0.206012	0.025645	0.395492
sps	344	354	DKFQILYNSIM	1371.7	7.6405	TTd-8E1-1H1	0	0	0
sps	344	354	DKFQILYNSIM	1371.7	7.646	TTd-8E1-1H1	10	0.133389	0.009503
sps	344	354	DKFQILYNSIM	1371.7	7.63968	TTd-8E1-1H1	30	0.278032	0.101128	0.411421	-0.015929	0.303384
sps	347	354	QILYNSIM	981.507	7.18499	TTd	0	0	0
sps	347	354	QILYNSIM	981.507	7.18667	TTd	10	0.167002	0.031553
sps	347	354	QILYNSIM	981.507	7.17923	TTd	30	0.141708	0.017628	0.30871
sps	347	354	QILYNSIM	981.507	7.18499	TTd-8E1-1H1	0	0	0
sps	347	354	QILYNSIM	981.507	7.18145	TTd-8E1-1H1	10	0.16541	0.01517
sps	347	354	QILYNSIM	981.507	7.18205	TTd-8E1-1H1	30	0.110457	0.016207	0.275867	0.032843	0.094659
sps	348	354	ILYNSIM	853.449	5.16379	TTd	0	0	0
sps	348	354	ILYNSIM	853.449	5.16087	TTd	10	1.27247	0.146918
sps	348	354	ILYNSIM	853.449	5.15339	TTd	30	1.41602	0.067744	2.6885
sps	348	354	ILYNSIM	853.449	5.16379	TTd-8E1-1H1	0	0	0
sps	348	354	ILYNSIM	853.449	5.16037	TTd-8E1-1H1	10	1.29858	0.087189
sps	348	354	ILYNSIM	853.449	5.15792	TTd-8E1-1H1	30	1.36964	0.104504	2.66822	0.020276	0.440754
sps	350	356	YNSIMYG	847.365	6.31874	TTd	0	0	0
sps	350	356	YNSIMYG	847.365	6.31669	TTd	10	0.190067	0.040683
sps	350	356	YNSIMYG	847.365	6.31074	TTd	30	0.172381	0.00682	0.362448
sps	350	356	YNSIMYG	847.365	6.31874	TTd-8E1-1H1	0	0	0
sps	350	356	YNSIMYG	847.365	6.31486	TTd-8E1-1H1	10	0.195897	0.006461
sps	350	356	YNSIMYG	847.365	6.31319	TTd-8E1-1H1	30	0.15758	0.044919	0.353477	0.008971	0.134757
sps	351	368	NSIMYGFTEIELGKKFNI	2104.08	6.69921	TTd	0	0	0
sps	351	368	NSIMYGFTEIELGKKFNI	2104.08	6.6973	TTd	10	4.04565	0.199619
sps	351	368	NSIMYGFTEIELGKKFNI	2104.08	6.68809	TTd	30	4.46182	0.124795	8.50747
sps	351	368	NSIMYGFTEIELGKKFNI	2104.08	6.69921	TTd-8E1-1H1	0	0	0
sps	351	368	NSIMYGFTEIELGKKFNI	2104.08	6.69048	TTd-8E1-1H1	10	4.23194	0.176823
sps	351	368	NSIMYGFTEIELGKKFNI	2104.08	6.68953	TTd-8E1-1H1	30	4.36415	0.127163	8.59609	-0.088621	0.598857
sps	360	374	IELGKKFNIKTRLSY	1810.06	5.47462	TTd	0	0	0
sps	360	374	IELGKKFNIKTRLSY	1810.06	5.46977	TTd	10	3.08601	0.302414
sps	360	374	IELGKKFNIKTRLSY	1810.06	5.46515	TTd	30	3.56224	0.1915	6.64826
sps	360	374	IELGKKFNIKTRLSY	1810.06	5.47462	TTd-8E1-1H1	0	0	0
sps	360	374	IELGKKFNIKTRLSY	1810.06	5.46816	TTd-8E1-1H1	10	3.62634	0.224916
sps	360	374	IELGKKFNIKTRLSY	1810.06	5.47006	TTd-8E1-1H1	30	3.67827	0.301525	7.3046	-0.656346	0.907242
sps	363	372	GKKFNIKTRL	1204.75	4.35818	TTd	0	0	0
sps	363	372	GKKFNIKTRL	1204.75	4.33686	TTd	10	1.67661	0.325555
sps	363	372	GKKFNIKTRL	1204.75	4.40307	TTd	30	1.87602	0.291998	3.55263
sps	363	372	GKKFNIKTRL	1204.75	4.35818	TTd-8E1-1H1	0	0	0
sps	363	372	GKKFNIKTRL	1204.75	4.33201	TTd-8E1-1H1	10	1.79294	0.26229
sps	363	372	GKKFNIKTRL	1204.75	4.40567	TTd-8E1-1H1	30	2.07372	0.377756	3.86666	-0.314026	1.13327
sps	363	374	GKKFNIKTRLSY	1454.85	4.73412	TTd	0	0	0
sps	363	374	GKKFNIKTRLSY	1454.85	4.75641	TTd	10	2.80041	0.314112
sps	363	374	GKKFNIKTRLSY	1454.85	4.7555	TTd	30	3.26987	0.056471	6.07028
sps	363	374	GKKFNIKTRLSY	1454.85	4.73412	TTd-8E1-1H1	0	0	0
sps	363	374	GKKFNIKTRLSY	1454.85	4.75698	TTd-8E1-1H1	10	3.23037	0.056398
sps	363	374	GKKFNIKTRLSY	1454.85	4.7599	TTd-8E1-1H1	30	3.22431	0.144071	6.45468	-0.384397	0.942336
sps	373	387	SYFSMNHDPVKIPNL	1761.86	6.58909	TTd	0	0	0
sps	373	387	SYFSMNHDPVKIPNL	1761.86	6.59062	TTd	10	2.14784	0.151468
sps	373	387	SYFSMNHDPVKIPNL	1761.86	6.58069	TTd	30	2.08867	0.303592	4.23651
sps	373	387	SYFSMNHDPVKIPNL	1761.86	6.58909	TTd-8E1-1H1	0	0	0
sps	373	387	SYFSMNHDPVKIPNL	1761.86	6.58611	TTd-8E1-1H1	10	2.16307	0.167798
sps	373	387	SYFSMNHDPVKIPNL	1761.86	6.58454	TTd-8E1-1H1	30	2.12057	0.103817	4.28364	-0.047125	0.910776
sps	375	387	FSMNHDPVKIPNL	1511.77	6.24685	TTd	0	0	0
sps	375	387	FSMNHDPVKIPNL	1511.77	6.2488	TTd	10	1.40991	0.14137
sps	375	387	FSMNHDPVKIPNL	1511.77	6.24243	TTd	30	1.38438	0.14322	2.79428
sps	375	387	FSMNHDPVKIPNL	1511.77	6.24685	TTd-8E1-1H1	0	0	0
sps	375	387	FSMNHDPVKIPNL	1511.77	6.24649	TTd-8E1-1H1	10	1.40848	0.077832
sps	375	387	FSMNHDPVKIPNL	1511.77	6.24461	TTd-8E1-1H1	30	1.49051	0.179907	2.89899	-0.104702	0.539721
sps	375	390	FSMNHDPVKIPNLLDD	1854.91	6.69177	TTd	0	0	0
sps	375	390	FSMNHDPVKIPNLLDD	1854.91	6.69445	TTd	10	2.5376	0.040321
sps	375	390	FSMNHDPVKIPNLLDD	1854.91	6.686	TTd	30	2.26892	0.177338	4.80652
sps	375	390	FSMNHDPVKIPNLLDD	1854.91	6.69177	TTd-8E1-1H1	0	0	0
sps	375	390	FSMNHDPVKIPNLLDD	1854.91	6.6896	TTd-8E1-1H1	10	2.44313	0.087288
sps	375	390	FSMNHDPVKIPNLLDD	1854.91	6.68761	TTd-8E1-1H1	30	2.19824	0.052185	4.64137	0.16515	0.532014
sps	378	387	NHDPVKIPNL	1146.63	5.56427	TTd	0	0	0
sps	378	387	NHDPVKIPNL	1146.63	5.56364	TTd	10	1.18337	0.085922
sps	378	387	NHDPVKIPNL	1146.63	5.56266	TTd	30	1.13447	0.040901	2.31784
sps	378	387	NHDPVKIPNL	1146.63	5.56427	TTd-8E1-1H1	0	0	0
sps	378	387	NHDPVKIPNL	1146.63	5.56526	TTd-8E1-1H1	10	1.11528	0.046481
sps	378	387	NHDPVKIPNL	1146.63	5.56118	TTd-8E1-1H1	30	1.13837	0.033958	2.25364	0.064198	0.257766
sps	388	399	LDDTIYNDTEGF	1402.6	7.38223	TTd	0	0	0
sps	388	399	LDDTIYNDTEGF	1402.6	7.38163	TTd	10	0.500125	0.075955
sps	388	399	LDDTIYNDTEGF	1402.6	7.37455	TTd	30	0.549909	0.018395	1.05003
sps	388	399	LDDTIYNDTEGF	1402.6	7.38223	TTd-8E1-1H1	0	0	0
sps	388	399	LDDTIYNDTEGF	1402.6	7.37988	TTd-8E1-1H1	10	0.536139	0.032904
sps	388	399	LDDTIYNDTEGF	1402.6	7.37638	TTd-8E1-1H1	30	0.469375	0.067077	1.00551	0.04452	0.227865
sps	390	399	DTIYNDTEGF	1174.49	7.21485	TTd	0	0	0
sps	390	399	DTIYNDTEGF	1174.49	7.21536	TTd	10	0.998637	0.065588
sps	390	399	DTIYNDTEGF	1174.49	7.20897	TTd	30	1.22583	0.059756	2.22447
sps	390	399	DTIYNDTEGF	1174.49	7.21485	TTd-8E1-1H1	0	0	0
sps	390	399	DTIYNDTEGF	1174.49	7.21106	TTd-8E1-1H1	10	1.07994	0.025938
sps	390	399	DTIYNDTEGF	1174.49	7.21046	TTd-8E1-1H1	30	1.19978	0.03805	2.27972	-0.055252	0.196764
sps	391	398	TIYNDTEG	912.394	5.17052	TTd	0	0	0
sps	391	398	TIYNDTEG	912.394	5.17034	TTd	10	1.0167	0.141058
sps	391	398	TIYNDTEG	912.394	5.16238	TTd	30	1.17835	0.024228	2.19505
sps	391	398	TIYNDTEG	912.394	5.17052	TTd-8E1-1H1	0	0	0
sps	391	398	TIYNDTEG	912.394	5.16849	TTd-8E1-1H1	10	1.03676	0.097489
sps	391	398	TIYNDTEG	912.394	5.1672	TTd-8E1-1H1	30	1.15932	0.025884	2.19608	-0.00103	0.423174
sps	392	399	IYNDTEGF	958.415	6.51853	TTd	0	0	0
sps	392	399	IYNDTEGF	958.415	6.51242	TTd	10	0.924183	0.205035
sps	392	399	IYNDTEGF	958.415	6.51011	TTd	30	1.22875	0.132069	2.15293
sps	392	399	IYNDTEGF	958.415	6.51853	TTd-8E1-1H1	0	0	0
sps	392	399	IYNDTEGF	958.415	6.51088	TTd-8E1-1H1	10	0.915787	0.354277
sps	392	399	IYNDTEGF	958.415	6.50861	TTd-8E1-1H1	30	1.31888	0.130779	2.23466	-0.081733	1.06283
sps	400	415	NIESKDLKSEYKGQNM	1883.92	4.73932	TTd	0	0	0
sps	400	415	NIESKDLKSEYKGQNM	1883.92	4.74466	TTd	10	2.23676	0.258991
sps	400	415	NIESKDLKSEYKGQNM	1883.92	4.73843	TTd	30	2.84613	0.279558	5.08289
sps	400	415	NIESKDLKSEYKGQNM	1883.92	4.73932	TTd-8E1-1H1	0	0	0
sps	400	415	NIESKDLKSEYKGQNM	1883.92	4.74389	TTd-8E1-1H1	10	2.50729	0.201478
sps	400	415	NIESKDLKSEYKGQNM	1883.92	4.74355	TTd-8E1-1H1	30	2.79434	0.274138	5.30164	-0.21875	0.838674
sps	403	415	SKDLKSEYKGQNM	1527.75	4.17982	TTd	0	0	0
sps	403	415	SKDLKSEYKGQNM	1527.75	4.15176	TTd	10	1.30021	0.155363
sps	403	415	SKDLKSEYKGQNM	1527.75	4.16242	TTd	30	1.73094	0.180897	3.03116
sps	403	415	SKDLKSEYKGQNM	1527.75	4.17982	TTd-8E1-1H1	0	0	0
sps	403	415	SKDLKSEYKGQNM	1527.75	4.15587	TTd-8E1-1H1	10	1.54194	0.205136
sps	403	415	SKDLKSEYKGQNM	1527.75	4.17483	TTd-8E1-1H1	30	1.46571	0.136772	3.00765	0.023501	0.615408
sps	459	465	TDLGGEL	704.346	6.27539	TTd	0	0	0
sps	459	465	TDLGGEL	704.346	6.27001	TTd	10	1.73628	0.059952
sps	459	465	TDLGGEL	704.346	6.26578	TTd	30	1.67424	0.051251	3.41052
sps	459	465	TDLGGEL	704.346	6.27539	TTd-8E1-1H1	0	0	0
sps	459	465	TDLGGEL	704.346	6.26848	TTd-8E1-1H1	10	1.65174	0.004747
sps	459	465	TDLGGEL	704.346	6.26726	TTd-8E1-1H1	30	1.56327	0.069407	3.21501	0.195508	0.208221
sps	477	491	IAEKNSFSEEPFQDE	1769.79	6.03635	TTd	0	0	0
sps	477	491	IAEKNSFSEEPFQDE	1769.79	6.02838	TTd	10	2.80586	0.20874
sps	477	491	IAEKNSFSEEPFQDE	1769.79	6.02786	TTd	30	3.16144	0.061243	5.96731
sps	477	491	IAEKNSFSEEPFQDE	1769.79	6.03635	TTd-8E1-1H1	0	0	0
sps	477	491	IAEKNSFSEEPFQDE	1769.79	6.0315	TTd-8E1-1H1	10	2.89955	0.140878
sps	477	491	IAEKNSFSEEPFQDE	1769.79	6.03164	TTd-8E1-1H1	30	3.20817	0.122223	6.10772	-0.140413	0.62622
sps	484	491	SEEPFQDE	980.384	5.91238	TTd	0	0	0
sps	484	491	SEEPFQDE	980.384	5.90906	TTd	10	0.86696	0.094904
sps	484	491	SEEPFQDE	980.384	5.90599	TTd	30	1.08509	0.036454	1.95205
sps	484	491	SEEPFQDE	980.384	5.91238	TTd-8E1-1H1	0	0	0
sps	484	491	SEEPFQDE	980.384	5.90995	TTd-8E1-1H1	10	0.873313	0.089884
sps	484	491	SEEPFQDE	980.384	5.90639	TTd-8E1-1H1	30	0.998584	0.079804	1.8719	0.080158	0.284712
sps	492	504	IVSYNTKNKPLNF	1537.84	5.43197	TTd	0	0	0
sps	492	504	IVSYNTKNKPLNF	1537.84	5.42706	TTd	10	4.61421	0.051059
sps	492	504	IVSYNTKNKPLNF	1537.84	5.42294	TTd	30	4.67893	0.068403	9.29313
sps	492	504	IVSYNTKNKPLNF	1537.84	5.43197	TTd-8E1-1H1	0	0	0
sps	492	504	IVSYNTKNKPLNF	1537.84	5.43059	TTd-8E1-1H1	10	4.57619	0.106555
sps	492	504	IVSYNTKNKPLNF	1537.84	5.42795	TTd-8E1-1H1	30	4.73447	0.077111	9.31066	-0.017525	0.319665
sps	496	504	NTKNKPLNF	1075.59	4.70305	TTd	0	0	0
sps	496	504	NTKNKPLNF	1075.59	4.71924	TTd	10	3.10884	0.069641
sps	496	504	NTKNKPLNF	1075.59	4.71748	TTd	30	3.1144	0.072042	6.22324
sps	496	504	NTKNKPLNF	1075.59	4.70305	TTd-8E1-1H1	0	0	0
sps	496	504	NTKNKPLNF	1075.59	4.72419	TTd-8E1-1H1	10	3.171	0.137419
sps	496	504	NTKNKPLNF	1075.59	4.7241	TTd-8E1-1H1	30	3.07675	0.08173	6.24775	-0.024506	0.412257
sps	498	510	KNKPLNFNYSLDK	1580.84	4.79187	TTd	0	0	0
sps	498	510	KNKPLNFNYSLDK	1580.84	4.79098	TTd	10	3.68932	0.078999
sps	498	510	KNKPLNFNYSLDK	1580.84	4.78515	TTd	30	3.64188	0.108708	7.33121
sps	498	510	KNKPLNFNYSLDK	1580.84	4.79192	TTd-8E1-1H1	0	0	0
sps	498	510	KNKPLNFNYSLDK	1580.84	4.78962	TTd-8E1-1H1	10	3.64426	0.088656
sps	498	510	KNKPLNFNYSLDK	1580.84	4.78878	TTd-8E1-1H1	30	3.62796	0.047387	7.27221	0.058996	0.326124
sps	508	516	LDKIIVDYN	1092.59	6.46441	TTd	0	0	0
sps	508	516	LDKIIVDYN	1092.59	6.46358	TTd	10	1.39349	0.157433
sps	508	516	LDKIIVDYN	1092.59	6.45398	TTd	30	1.62731	0.076394	3.02079
sps	508	516	LDKIIVDYN	1092.59	6.46441	TTd-8E1-1H1	0	0	0
sps	508	516	LDKIIVDYN	1092.59	6.46225	TTd-8E1-1H1	10	1.43919	0.069027
sps	508	516	LDKIIVDYN	1092.59	6.45749	TTd-8E1-1H1	30	1.59222	0.085223	3.03142	-0.010627	0.472299
sps	508	517	LDKIIVDYNL	1205.68	6.64983	TTd	0	0	0
sps	508	517	LDKIIVDYNL	1205.68	6.65154	TTd	10	1.54908	0.159968
sps	508	517	LDKIIVDYNL	1205.68	6.64119	TTd	30	1.8611	0.069804	3.41018
sps	508	517	LDKIIVDYNL	1205.68	6.64983	TTd-8E1-1H1	0	0	0
sps	508	517	LDKIIVDYNL	1205.68	6.64602	TTd-8E1-1H1	10	1.66385	0.056714
sps	508	517	LDKIIVDYNL	1205.68	6.64235	TTd-8E1-1H1	30	1.80704	0.048486	3.47089	-0.060707	0.479904
sps	509	515	DKIIVDY	865.467	5.83344	TTd	0	0	0
sps	509	515	DKIIVDY	865.467	5.83763	TTd	10	0.229368	0.060913
sps	509	515	DKIIVDY	865.467	5.83184	TTd	30	0.398588	0.011088	0.627956
sps	509	515	DKIIVDY	865.467	5.83344	TTd-8E1-1H1	0	0	0
sps	509	515	DKIIVDY	865.467	5.83864	TTd-8E1-1H1	10	0.233313	0.043598
sps	509	515	DKIIVDY	865.467	5.83089	TTd-8E1-1H1	30	0.359287	0.010404	0.5926	0.035356	0.182739
sps	523	529	LPNDRTT	816.421	5.53827	TTd	0	0	0
sps	523	529	LPNDRTT	816.421	5.53833	TTd	10	0.048646	0.072801
sps	523	529	LPNDRTT	816.421	5.53496	TTd	30	0.084987	0.074298	0.133633
sps	523	529	LPNDRTT	816.421	5.53827	TTd-8E1-1H1	0	0	0
sps	523	529	LPNDRTT	816.421	5.53875	TTd-8E1-1H1	10	0.051363	0.06539
sps	523	529	LPNDRTT	816.421	5.5358	TTd-8E1-1H1	30	0.07292	0.086428	0.124283	0.00935	0.259284
sps	549	556	IEIHNIDD	968.468	5.19708	TTd	0	0	0
sps	549	556	IEIHNIDD	968.468	5.19463	TTd	10	1.20719	0.13855
sps	549	556	IEIHNIDD	968.468	5.1872	TTd	30	1.34019	0.106707	2.54738
sps	549	556	IEIHNIDD	968.468	5.19708	TTd-8E1-1H1	0	0	0
sps	549	556	IEIHNIDD	968.468	5.19452	TTd-8E1-1H1	10	1.17584	0.109262
sps	549	556	IEIHNIDD	968.468	5.19113	TTd-8E1-1H1	30	1.31141	0.11018	2.48725	0.060126	0.41565
sps	549	557	IEIHNIDDN	1082.51	5.10207	TTd	0	0	0
sps	549	557	IEIHNIDDN	1082.51	5.10101	TTd	10	1.51073	0.090919
sps	549	557	IEIHNIDDN	1082.51	5.09193	TTd	30	1.66619	0.038779	3.17691
sps	549	557	IEIHNIDDN	1082.51	5.10207	TTd-8E1-1H1	0	0	0
sps	549	557	IEIHNIDDN	1082.51	5.10093	TTd-8E1-1H1	10	1.54329	0.023835
sps	549	557	IEIHNIDDN	1082.51	5.0959	TTd-8E1-1H1	30	1.61993	0.034222	3.16322	0.013691	0.272757
sps	549	560	IEIHNIDDNTIY	1459.71	6.28827	TTd	0	0	0
sps	549	560	IEIHNIDDNTIY	1459.71	6.28311	TTd	10	2.48528	0.213668
sps	549	560	IEIHNIDDNTIY	1459.71	6.27694	TTd	30	2.72177	0.007041	5.20705
sps	549	560	IEIHNIDDNTIY	1459.71	6.28827	TTd-8E1-1H1	0	0	0
sps	549	560	IEIHNIDDNTIY	1459.71	6.28198	TTd-8E1-1H1	10	2.48535	0.054648
sps	549	560	IEIHNIDDNTIY	1459.71	6.28047	TTd-8E1-1H1	30	2.71922	0.052714	5.20458	0.002478	0.641004
sps	549	561	IEIHNIDDNTIYQ	1587.76	6.02105	TTd	0	0	0
sps	549	561	IEIHNIDDNTIYQ	1587.76	6.01463	TTd	10	2.54939	0.19387
sps	549	561	IEIHNIDDNTIYQ	1587.76	6.01086	TTd	30	3.00758	0.047739	5.55697
sps	549	561	IEIHNIDDNTIYQ	1587.76	6.02105	TTd-8E1-1H1	0	0	0
sps	549	561	IEIHNIDDNTIYQ	1587.76	6.01386	TTd-8E1-1H1	10	2.65661	0.097186
sps	549	561	IEIHNIDDNTIYQ	1587.76	6.01141	TTd-8E1-1H1	30	2.93241	0.073115	5.58902	-0.032055	0.58161
sps	549	562	IEIHNIDDNTIYQY	1750.83	6.5581	TTd	0	0	0
sps	549	562	IEIHNIDDNTIYQY	1750.83	6.55192	TTd	10	2.85594	0.19439
sps	549	562	IEIHNIDDNTIYQY	1750.83	6.54585	TTd	30	3.10704	0.053085	5.96298
sps	549	562	IEIHNIDDNTIYQY	1750.83	6.5581	TTd-8E1-1H1	0	0	0
sps	549	562	IEIHNIDDNTIYQY	1750.83	6.55017	TTd-8E1-1H1	10	2.87977	0.050179
sps	549	562	IEIHNIDDNTIYQY	1750.83	6.54875	TTd-8E1-1H1	30	3.19369	0.095635	6.07346	-0.110476	0.58317
sps	549	563	IEIHNIDDNTIYQYL	1863.91	7.50777	TTd	0	0	0
sps	549	563	IEIHNIDDNTIYQYL	1863.91	7.50301	TTd	10	2.62718	0.213065
sps	549	563	IEIHNIDDNTIYQYL	1863.91	7.49404	TTd	30	2.98986	0.062913	5.61704
sps	549	563	IEIHNIDDNTIYQYL	1863.91	7.50777	TTd-8E1-1H1	0	0	0
sps	549	563	IEIHNIDDNTIYQYL	1863.91	7.50306	TTd-8E1-1H1	10	2.73139	0.064036
sps	549	563	IEIHNIDDNTIYQYL	1863.91	7.49581	TTd-8E1-1H1	30	2.92602	0.07834	5.65741	-0.04037	0.639195
sps	550	556	EIHNIDD	855.384	5.21863	TTd	0	0	0
sps	550	556	EIHNIDD	855.384	5.21546	TTd	10	1.15811	0.183265
sps	550	556	EIHNIDD	855.384	5.20771	TTd	30	1.33861	0.029337	2.49672
sps	550	556	EIHNIDD	855.384	5.21863	TTd-8E1-1H1	0	0	0
sps	550	556	EIHNIDD	855.384	5.21231	TTd-8E1-1H1	10	1.26319	0.067693
sps	550	556	EIHNIDD	855.384	5.21055	TTd-8E1-1H1	30	1.42532	0.160687	2.68851	-0.191792	0.549795
sps	557	563	NTIYQYL	914.462	7.51881	TTd	0	0	0
sps	557	563	NTIYQYL	914.462	7.51673	TTd	10	0.954865	0.034558
sps	557	563	NTIYQYL	914.462	7.50655	TTd	30	1.09689	0.043182	2.05176
sps	557	563	NTIYQYL	914.462	7.51881	TTd-8E1-1H1	0	0	0
sps	557	563	NTIYQYL	914.462	7.51559	TTd-8E1-1H1	10	0.937664	0.050558
sps	557	563	NTIYQYL	914.462	7.50863	TTd-8E1-1H1	30	1.00152	0.067709	1.93919	0.11257	0.203127
sps	573	579	QRITMTN	863.44	4.20301	TTd	0	0	0
sps	573	579	QRITMTN	863.44	4.18718	TTd	10	0.676129	0.063087
sps	573	579	QRITMTN	863.44	4.20767	TTd	30	0.782758	0.066734	1.45889
sps	573	579	QRITMTN	863.44	4.20301	TTd-8E1-1H1	0	0	0
sps	573	579	QRITMTN	863.44	4.19458	TTd-8E1-1H1	10	0.70269	0.051513
sps	573	579	QRITMTN	863.44	4.216	TTd-8E1-1H1	30	0.738289	0.066331	1.44098	0.017908	0.200202
sps	573	583	QRITMTNSVDD	1279.59	4.91467	TTd	0	0	0
sps	573	583	QRITMTNSVDD	1279.59	4.91049	TTd	10	2.22532	0.13989
sps	573	583	QRITMTNSVDD	1279.59	4.90323	TTd	30	2.38731	0.074477	4.61263
sps	573	583	QRITMTNSVDD	1279.59	4.91467	TTd-8E1-1H1	0	0	0
sps	573	583	QRITMTNSVDD	1279.59	4.9123	TTd-8E1-1H1	10	2.34334	0.053939
sps	573	583	QRITMTNSVDD	1279.59	4.90872	TTd-8E1-1H1	30	2.41357	0.081036	4.75691	-0.144284	0.41967
sps	573	585	QRITMTNSVDDAL	1463.72	5.96739	TTd	0	0	0
sps	573	585	QRITMTNSVDDAL	1463.72	5.96333	TTd	10	2.30943	0.156655
sps	573	585	QRITMTNSVDDAL	1463.72	5.95786	TTd	30	2.42624	0.081208	4.73567
sps	573	585	QRITMTNSVDDAL	1463.72	5.96739	TTd-8E1-1H1	0	0	0
sps	573	585	QRITMTNSVDDAL	1463.72	5.96426	TTd-8E1-1H1	10	2.38286	0.051102
sps	573	585	QRITMTNSVDDAL	1463.72	5.96111	TTd-8E1-1H1	30	2.42584	0.068796	4.80869	-0.073023	0.469965
sps	584	592	ALINSTKIY	1022.59	5.76961	TTd	0	0	0
sps	584	592	ALINSTKIY	1022.59	5.76752	TTd	10	1.09411	0.124363
sps	584	592	ALINSTKIY	1022.59	5.76379	TTd	30	1.25871	0.110194	2.35281
sps	584	592	ALINSTKIY	1022.59	5.76961	TTd-8E1-1H1	0	0	0
sps	584	592	ALINSTKIY	1022.59	5.76793	TTd-8E1-1H1	10	1.15405	0.096526
sps	584	592	ALINSTKIY	1022.59	5.76476	TTd-8E1-1H1	30	1.23096	0.131981	2.38501	-0.032199	0.395943
sps	586	595	INSTKIYSYF	1235.63	6.71837	TTd	0	0	0
sps	586	595	INSTKIYSYF	1235.63	6.722	TTd	10	0.770886	0.068215
sps	586	595	INSTKIYSYF	1235.63	6.7102	TTd	30	0.789367	0.015654	1.56025
sps	586	595	INSTKIYSYF	1235.63	6.71837	TTd-8E1-1H1	0	0	0
sps	586	595	INSTKIYSYF	1235.63	6.71688	TTd-8E1-1H1	10	0.677004	0.110474
sps	586	595	INSTKIYSYF	1235.63	6.71454	TTd-8E1-1H1	30	0.702987	0.088216	1.37999	0.180262	0.331422
sps	592	598	YSYFPSV	862.398	7.33013	TTd	0	0	0
sps	592	598	YSYFPSV	862.398	7.33215	TTd	10	0.639256	0.037801
sps	592	598	YSYFPSV	862.398	7.32362	TTd	30	0.655506	0.056276	1.29476
sps	592	598	YSYFPSV	862.398	7.33013	TTd-8E1-1H1	0	0	0
sps	592	598	YSYFPSV	862.398	7.32806	TTd-8E1-1H1	10	0.634409	0.043786
sps	592	598	YSYFPSV	862.398	7.32498	TTd-8E1-1H1	30	0.596105	0.058881	1.23051	0.064248	0.176643
sps	593	601	SYFPSVISK	1027.55	6.01734	TTd	0	0	0
sps	593	601	SYFPSVISK	1027.55	6.01481	TTd	10	1.03076	0.281582
sps	593	601	SYFPSVISK	1027.55	6.00991	TTd	30	1.42384	0.08661	2.4546
sps	593	601	SYFPSVISK	1027.55	6.01637	TTd-8E1-1H1	0	0	0
sps	593	601	SYFPSVISK	1027.55	6.01302	TTd-8E1-1H1	10	1.07321	0.029795
sps	593	601	SYFPSVISK	1027.55	6.00958	TTd-8E1-1H1	30	1.37542	0.118579	2.44863	0.005972	0.844746
sps	593	611	SYFPSVISKVNQGAQGILF	2055.09	7.60411	TTd	0	0	0
sps	593	611	SYFPSVISKVNQGAQGILF	2055.09	7.60034	TTd	10	6.06301	0.356853
sps	593	611	SYFPSVISKVNQGAQGILF	2055.09	7.58833	TTd	30	6.64504	0.095719	12.7081
sps	593	611	SYFPSVISKVNQGAQGILF	2055.09	7.60411	TTd-8E1-1H1	0	0	0
sps	593	611	SYFPSVISKVNQGAQGILF	2055.09	7.59784	TTd-8E1-1H1	10	6.36256	0.025769
sps	593	611	SYFPSVISKVNQGAQGILF	2055.09	7.58932	TTd-8E1-1H1	30	6.69909	0.074967	13.0617	-0.353594	1.07056
sps	596	611	PSVISKVNQGAQGILF	1657.93	6.84347	TTd	0	0	0
sps	596	611	PSVISKVNQGAQGILF	1657.93	6.83441	TTd	10	6.03918	0.329026
sps	596	611	PSVISKVNQGAQGILF	1657.93	6.82148	TTd	30	6.47711	0.094773	12.5163
sps	596	611	PSVISKVNQGAQGILF	1657.93	6.84347	TTd-8E1-1H1	0	0	0
sps	596	611	PSVISKVNQGAQGILF	1657.93	6.82903	TTd-8E1-1H1	10	6.20355	0.046218
sps	596	611	PSVISKVNQGAQGILF	1657.93	6.82473	TTd-8E1-1H1	30	6.51552	0.07636	12.7191	-0.202773	0.987078
sps	599	612	ISKVNQGAQGILFL	1487.86	7.19101	TTd	0	0	0
sps	599	612	ISKVNQGAQGILFL	1487.86	7.1937	TTd	10	5.52456	0.288073
sps	599	612	ISKVNQGAQGILFL	1487.86	7.18221	TTd	30	5.77173	0.059201	11.2963
sps	599	612	ISKVNQGAQGILFL	1487.86	7.19101	TTd-8E1-1H1	0	0	0
sps	599	612	ISKVNQGAQGILFL	1487.86	7.19004	TTd-8E1-1H1	10	5.41186	0.041859
sps	599	612	ISKVNQGAQGILFL	1487.86	7.1866	TTd-8E1-1H1	30	5.82856	0.25235	11.2404	0.055873	0.864219
sps	600	612	SKVNQGAQGILFL	1374.77	6.44445	TTd	0	0	0
sps	600	612	SKVNQGAQGILFL	1374.77	6.43869	TTd	10	4.69632	0.131616
sps	600	612	SKVNQGAQGILFL	1374.77	6.42818	TTd	30	4.84398	0.114122	9.54029
sps	600	612	SKVNQGAQGILFL	1374.77	6.44445	TTd-8E1-1H1	0	0	0
sps	600	612	SKVNQGAQGILFL	1374.77	6.43715	TTd-8E1-1H1	10	4.68511	0.107311
sps	600	612	SKVNQGAQGILFL	1374.77	6.4313	TTd-8E1-1H1	30	4.90425	0.132439	9.58935	-0.049061	0.397317
sps	601	611	KVNQGAQGILF	1174.66	6.36685	TTd	0	0	0
sps	601	611	KVNQGAQGILF	1174.66	6.36229	TTd	10	4.51592	0.073991
sps	601	611	KVNQGAQGILF	1174.66	6.35325	TTd	30	4.52267	0.057446	9.03859
sps	601	611	KVNQGAQGILF	1174.66	6.36685	TTd-8E1-1H1	0	0	0
sps	601	611	KVNQGAQGILF	1174.66	6.36191	TTd-8E1-1H1	10	4.47687	0.058506
sps	601	611	KVNQGAQGILF	1174.66	6.35738	TTd-8E1-1H1	30	4.56598	0.082041	9.04285	-0.004264	0.246123
sps	604	611	QGAQGILF	833.452	7.40587	TTd	0	0	0
sps	604	611	QGAQGILF	833.452	7.40454	TTd	10	3.21317	0.031955
sps	604	611	QGAQGILF	833.452	7.3958	TTd	30	3.16371	0.040719	6.37688
sps	604	611	QGAQGILF	833.452	7.40587	TTd-8E1-1H1	0	0	0
sps	604	611	QGAQGILF	833.452	7.40364	TTd-8E1-1H1	10	3.12846	0.024751
sps	604	611	QGAQGILF	833.452	7.39729	TTd-8E1-1H1	30	3.13504	0.066474	6.2635	0.113373	0.199422
sps	609	621	ILFLQWVRDIIDD	1645.89	5.4049	TTd	0	0	0
sps	609	621	ILFLQWVRDIIDD	1645.89	5.38458	TTd	10	6.32896	0.10389
sps	609	621	ILFLQWVRDIIDD	1645.89	5.37786	TTd	30	6.38201	0.172645	12.711
sps	609	621	ILFLQWVRDIIDD	1645.89	5.4049	TTd-8E1-1H1	0	0	0
sps	609	621	ILFLQWVRDIIDD	1645.89	5.38405	TTd-8E1-1H1	10	6.26337	0.093088
sps	609	621	ILFLQWVRDIIDD	1645.89	5.38109	TTd-8E1-1H1	30	6.40534	0.171228	12.6687	0.042253	0.517935
sps	611	617	FLQWVRD	963.505	6.42363	TTd	0	0	0
sps	611	617	FLQWVRD	963.505	6.42098	TTd	10	0.400872	0.121375
sps	611	617	FLQWVRD	963.505	6.4107	TTd	30	0.556766	0.073816	0.957638
sps	611	617	FLQWVRD	963.505	6.42371	TTd-8E1-1H1	0	0	0
sps	611	617	FLQWVRD	963.505	6.41718	TTd-8E1-1H1	10	0.525223	0.037383
sps	611	617	FLQWVRD	963.505	6.41429	TTd-8E1-1H1	30	0.578656	0.047379	1.10388	-0.146241	0.364125
sps	612	621	LQWVRDIIDD	1272.66	7.03958	TTd	0	0	0
sps	612	621	LQWVRDIIDD	1272.66	7.04268	TTd	10	0.116261	0.056093
sps	612	621	LQWVRDIIDD	1272.66	7.03446	TTd	30	0.094773	0.020143	0.211034
sps	612	621	LQWVRDIIDD	1272.66	7.03958	TTd-8E1-1H1	0	0	0
sps	612	621	LQWVRDIIDD	1272.66	7.03838	TTd-8E1-1H1	10	-0.015432	0.016829
sps	612	621	LQWVRDIIDD	1272.66	7.04098	TTd-8E1-1H1	30	0.053683	0.033035	0.038251	0.172783	0.168279
sps	613	621	QWVRDIIDD	1159.57	6.43365	TTd	0	0	0
sps	613	621	QWVRDIIDD	1159.57	6.4303	TTd	10	0.130163	0.01301
sps	613	621	QWVRDIIDD	1159.57	6.42122	TTd	30	0.130282	0.053936	0.260445
sps	613	621	QWVRDIIDD	1159.57	6.43365	TTd-8E1-1H1	0	0	0
sps	613	621	QWVRDIIDD	1159.57	6.4274	TTd-8E1-1H1	10	0.1189	0.071686
sps	613	621	QWVRDIIDD	1159.57	6.42614	TTd-8E1-1H1	30	0.067557	0.046791	0.186457	0.073988	0.215058
sps	622	640	FTNESSQKTTIDKISDVST	2101.03	5.25397	TTd	0	0	0
sps	622	640	FTNESSQKTTIDKISDVST	2101.03	5.23395	TTd	10	5.37785	0.22245
sps	622	640	FTNESSQKTTIDKISDVST	2101.03	5.22906	TTd	30	6.13222	0.08884	11.5101
sps	622	640	FTNESSQKTTIDKISDVST	2101.03	5.25397	TTd-8E1-1H1	0	0	0
sps	622	640	FTNESSQKTTIDKISDVST	2101.03	5.24538	TTd-8E1-1H1	10	3.24333	0.113185
sps	622	640	FTNESSQKTTIDKISDVST	2101.03	5.24242	TTd-8E1-1H1	30	3.66254	0.124859	6.90587	4.6042	0.66735
sps	622	649	FTNESSQKTTIDKISDVSTIVPYIGPAL	3024.58	7.15128	TTd	0	0	0
sps	622	649	FTNESSQKTTIDKISDVSTIVPYIGPAL	3024.58	7.14474	TTd	10	5.29537	0.441482
sps	622	649	FTNESSQKTTIDKISDVSTIVPYIGPAL	3024.58	7.13455	TTd	30	6.39663	0.129799	11.692
sps	622	649	FTNESSQKTTIDKISDVSTIVPYIGPAL	3024.58	7.15128	TTd-8E1-1H1	0	0	0
sps	622	649	FTNESSQKTTIDKISDVSTIVPYIGPAL	3024.58	7.1445	TTd-8E1-1H1	10	3.38567	0.093014
sps	622	649	FTNESSQKTTIDKISDVSTIVPYIGPAL	3024.58	7.1424	TTd-8E1-1H1	30	3.96954	0.096061	7.35521	4.33678	1.32445
sps	622	650	FTNESSQKTTIDKISDVSTIVPYIGPALN	3138.62	6.97033	TTd	0	0	0
sps	622	650	FTNESSQKTTIDKISDVSTIVPYIGPALN	3138.62	6.9661	TTd	10	5.58871	0.267197
sps	622	650	FTNESSQKTTIDKISDVSTIVPYIGPALN	3138.62	6.95377	TTd	30	6.43668	0.177193	12.0254
sps	622	650	FTNESSQKTTIDKISDVSTIVPYIGPALN	3138.62	6.97033	TTd-8E1-1H1	0	0	0
sps	622	650	FTNESSQKTTIDKISDVSTIVPYIGPALN	3138.62	6.96686	TTd-8E1-1H1	10	3.34716	0.133457
sps	622	650	FTNESSQKTTIDKISDVSTIVPYIGPALN	3138.62	6.96302	TTd-8E1-1H1	30	3.79684	0.231759	7.144	4.88138	0.801591
sps	625	649	ESSQKTTIDKISDVSTIVPYIGPAL	2662.42	7.12929	TTd	0	0	0
sps	625	649	ESSQKTTIDKISDVSTIVPYIGPAL	2662.42	7.11982	TTd	10	5.04805	0.084999
sps	625	649	ESSQKTTIDKISDVSTIVPYIGPAL	2662.42	7.11328	TTd	30	5.65497	0.207167	10.703
sps	625	649	ESSQKTTIDKISDVSTIVPYIGPAL	2662.42	7.12929	TTd-8E1-1H1	0	0	0
sps	625	649	ESSQKTTIDKISDVSTIVPYIGPAL	2662.42	7.12148	TTd-8E1-1H1	10	3.00762	0.089643
sps	625	649	ESSQKTTIDKISDVSTIVPYIGPAL	2662.42	7.12131	TTd-8E1-1H1	30	3.56665	0.124972	6.57427	4.12875	0.621501
sps	629	637	KTTIDKISD	1020.56	4.82847	TTd	0	0	0
sps	629	637	KTTIDKISD	1020.56	5.11958	TTd	10	2.69013	0.073298
sps	629	637	KTTIDKISD	1020.56	5.11412	TTd	30	2.58396	0.09524	5.27409
sps	629	637	KTTIDKISD	1020.56	4.82847	TTd-8E1-1H1	0	0	0
sps	629	637	KTTIDKISD	1020.56	5.12137	TTd-8E1-1H1	10	2.58841	0.068778
sps	629	637	KTTIDKISD	1020.56	5.11949	TTd-8E1-1H1	30	2.6342	0.085193	5.2226	0.051484	0.28572
sps	638	649	VSTIVPYIGPAL	1229.71	7.66033	TTd	0	0	0
sps	638	649	VSTIVPYIGPAL	1229.71	7.66444	TTd	10	0.590833	0.168148
sps	638	649	VSTIVPYIGPAL	1229.71	7.65674	TTd	30	0.898246	0.041705	1.48908
sps	638	649	VSTIVPYIGPAL	1229.71	7.66033	TTd-8E1-1H1	0	0	0
sps	638	649	VSTIVPYIGPAL	1229.71	7.66355	TTd-8E1-1H1	10	0.649379	0.070466
sps	638	649	VSTIVPYIGPAL	1229.71	7.65808	TTd-8E1-1H1	30	0.859961	0.022323	1.50934	-0.020261	0.504444
sps	640	649	TIVPYIGPAL	1043.61	7.52793	TTd	0	0	0
sps	640	649	TIVPYIGPAL	1043.61	7.52824	TTd	10	0.34677	0.077516
sps	640	649	TIVPYIGPAL	1043.61	7.51996	TTd	30	0.556458	0.036023	0.903228
sps	640	649	TIVPYIGPAL	1043.61	7.52793	TTd-8E1-1H1	0	0	0
sps	640	649	TIVPYIGPAL	1043.61	7.52784	TTd-8E1-1H1	10	0.427051	0.039183
sps	640	649	TIVPYIGPAL	1043.61	7.52153	TTd-8E1-1H1	30	0.54771	0.033149	0.974761	-0.071533	0.232548
sps	641	649	IVPYIGPAL	942.566	7.32797	TTd	0	0	0
sps	641	649	IVPYIGPAL	942.566	7.32812	TTd	10	0.459544	0.129603
sps	641	649	IVPYIGPAL	942.566	7.32049	TTd	30	0.604022	0.111569	1.06357
sps	641	649	IVPYIGPAL	942.566	7.32797	TTd-8E1-1H1	0	0	0
sps	641	649	IVPYIGPAL	942.566	7.32538	TTd-8E1-1H1	10	0.453745	0.101736
sps	641	649	IVPYIGPAL	942.566	7.32239	TTd-8E1-1H1	30	0.519007	0.092662	0.972752	0.090814	0.388809
sps	641	650	IVPYIGPALN	1056.61	6.83763	TTd	0	0	0
sps	641	650	IVPYIGPALN	1056.61	6.83473	TTd	10	0.427128	0.06312
sps	641	650	IVPYIGPALN	1056.61	6.82931	TTd	30	0.596941	0.10579	1.02407
sps	641	650	IVPYIGPALN	1056.61	6.83763	TTd-8E1-1H1	0	0	0
sps	641	650	IVPYIGPALN	1056.61	6.83136	TTd-8E1-1H1	10	0.425852	0.059273
sps	641	650	IVPYIGPALN	1056.61	6.83016	TTd-8E1-1H1	30	0.517505	0.097237	0.943357	0.080712	0.31737
sps	643	649	PYIGPAL	730.413	7.32568	TTd	0	0	0
sps	643	649	PYIGPAL	730.413	7.32739	TTd	10	0.317267	0.077427
sps	643	649	PYIGPAL	730.413	7.31724	TTd	30	0.442059	0.037176	0.759326
sps	643	649	PYIGPAL	730.413	7.32568	TTd-8E1-1H1	0	0	0
sps	643	649	PYIGPAL	730.413	7.32389	TTd-8E1-1H1	10	0.325085	0.028779
sps	643	649	PYIGPAL	730.413	7.32078	TTd-8E1-1H1	30	0.436091	0.051034	0.761176	-0.00185	0.232281
sps	650	660	NIVKQGYEGNF	1268.63	5.64359	TTd	0	0	0
sps	650	660	NIVKQGYEGNF	1268.63	5.63531	TTd	10	4.35064	0.191864
sps	650	660	NIVKQGYEGNF	1268.63	5.63477	TTd	30	4.44573	0.167232	8.79637
sps	650	660	NIVKQGYEGNF	1268.63	5.64359	TTd-8E1-1H1	0	0	0
sps	650	660	NIVKQGYEGNF	1268.63	5.63831	TTd-8E1-1H1	10	4.3492	0.173242
sps	650	660	NIVKQGYEGNF	1268.63	5.63478	TTd-8E1-1H1	30	4.43353	0.174822	8.78273	0.013642	0.575592
sps	650	664	NIVKQGYEGNFIGAL	1622.85	6.86567	TTd	0	0	0
sps	650	664	NIVKQGYEGNFIGAL	1622.85	6.86366	TTd	10	4.80716	0.286447
sps	650	664	NIVKQGYEGNFIGAL	1622.85	6.85033	TTd	30	5.22264	0.052088	10.0298
sps	650	664	NIVKQGYEGNFIGAL	1622.85	6.86567	TTd-8E1-1H1	0	0	0
sps	650	664	NIVKQGYEGNFIGAL	1622.85	6.8582	TTd-8E1-1H1	10	4.61739	0.091704
sps	650	664	NIVKQGYEGNFIGAL	1622.85	6.85432	TTd-8E1-1H1	30	4.85199	0.043875	9.46938	0.560421	0.859341
sps	652	663	VKQGYEGNFIGA	1282.64	5.4292	TTd	0	0	0
sps	652	663	VKQGYEGNFIGA	1282.64	5.42563	TTd	10	2.72057	0.091188
sps	652	663	VKQGYEGNFIGA	1282.64	5.42104	TTd	30	2.91785	0.038723	5.63842
sps	652	663	VKQGYEGNFIGA	1282.64	5.4292	TTd-8E1-1H1	0	0	0
sps	652	663	VKQGYEGNFIGA	1282.64	5.42861	TTd-8E1-1H1	10	2.72677	0.043566
sps	652	663	VKQGYEGNFIGA	1282.64	5.42572	TTd-8E1-1H1	30	2.91002	0.066694	5.63679	0.001631	0.273564
sps	658	664	GNFIGAL	691.377	7.19519	TTd	0	0	0
sps	658	664	GNFIGAL	691.377	7.19357	TTd	10	0.996423	0.214519
sps	658	664	GNFIGAL	691.377	7.1867	TTd	30	1.20677	0.045391	2.20319
sps	658	664	GNFIGAL	691.377	7.19519	TTd-8E1-1H1	0	0	0
sps	658	664	GNFIGAL	691.377	7.19095	TTd-8E1-1H1	10	0.72739	0.053124
sps	658	664	GNFIGAL	691.377	7.18985	TTd-8E1-1H1	30	0.813553	0.096018	1.54094	0.662245	0.643557
sps	661	668	IGALETTG	761.404	5.27987	TTd	0	0	0
sps	661	668	IGALETTG	761.404	5.27858	TTd	10	1.2211	0.203081
sps	661	668	IGALETTG	761.404	5.27245	TTd	30	1.6003	0.10419	2.8214
sps	661	668	IGALETTG	761.404	5.27987	TTd-8E1-1H1	0	0	0
sps	661	668	IGALETTG	761.404	5.2769	TTd-8E1-1H1	10	0.267844	0.104242
sps	661	668	IGALETTG	761.404	5.27566	TTd-8E1-1H1	30	0.206091	0.070942	0.473935	2.34746	0.609243
sps	664	671	LETTGVVL	831.482	6.60845	TTd	0	0	0
sps	664	671	LETTGVVL	831.482	6.60339	TTd	10	1.66533	0.150292
sps	664	671	LETTGVVL	831.482	6.59725	TTd	30	1.91278	0.070138	3.57811
sps	664	671	LETTGVVL	831.482	6.60845	TTd-8E1-1H1	0	0	0
sps	664	671	LETTGVVL	831.482	6.60191	TTd-8E1-1H1	10	0.881624	0.031915
sps	664	671	LETTGVVL	831.482	6.6009	TTd-8E1-1H1	30	0.852759	0.035456	1.73438	1.84373	0.450876
sps	665	671	ETTGVVL	718.398	6.18316	TTd	0	0	0
sps	665	671	ETTGVVL	718.398	6.1825	TTd	10	1.14689	0.087969
sps	665	671	ETTGVVL	718.398	6.17654	TTd	30	1.32648	0.0514	2.47338
sps	665	671	ETTGVVL	718.398	6.18316	TTd-8E1-1H1	0	0	0
sps	665	671	ETTGVVL	718.398	6.18202	TTd-8E1-1H1	10	0.771543	0.015302
sps	665	671	ETTGVVL	718.398	6.17862	TTd-8E1-1H1	30	0.771686	0.031398	1.54323	0.93015	0.263907
sps	665	672	ETTGVVLL	831.482	7.18561	TTd	0	0	0
sps	665	672	ETTGVVLL	831.482	7.18509	TTd	10	1.1257	0.10579
sps	665	672	ETTGVVLL	831.482	7.17862	TTd	30	1.26206	0.020016	2.38775
sps	665	672	ETTGVVLL	831.482	7.18561	TTd-8E1-1H1	0	0	0
sps	665	672	ETTGVVLL	831.482	7.18153	TTd-8E1-1H1	10	0.786624	0.024055
sps	665	672	ETTGVVLL	831.482	7.18112	TTd-8E1-1H1	30	0.78119	0.014383	1.56781	0.81994	0.31737
sps	674	681	EYIPEITL	977.519	7.67516	TTd	0	0	0
sps	674	681	EYIPEITL	977.519	7.67612	TTd	10	2.65949	0.185751
sps	674	681	EYIPEITL	977.519	7.66848	TTd	30	2.92493	0.040005	5.58442
sps	674	681	EYIPEITL	977.519	7.67516	TTd-8E1-1H1	0	0	0
sps	674	681	EYIPEITL	977.519	7.67574	TTd-8E1-1H1	10	2.79174	0.049162
sps	674	681	EYIPEITL	977.519	7.66974	TTd-8E1-1H1	30	2.90395	0.078082	5.69569	-0.111267	0.557253
sps	675	681	YIPEITL	848.476	7.5584	TTd	0	0	0
sps	675	681	YIPEITL	848.476	7.55709	TTd	10	2.02626	0.171081
sps	675	681	YIPEITL	848.476	7.54855	TTd	30	2.34647	0.022083	4.37273
sps	675	681	YIPEITL	848.476	7.5584	TTd-8E1-1H1	0	0	0
sps	675	681	YIPEITL	848.476	7.55679	TTd-8E1-1H1	10	2.18173	0.035557
sps	675	681	YIPEITL	848.476	7.54922	TTd-8E1-1H1	30	2.37479	0.046328	4.55652	-0.183792	0.513243
sps	702	710	TIDNFLEKR	1135.61	4.43139	TTd	0	0	0
sps	702	710	TIDNFLEKR	1135.61	4.43574	TTd	10	3.93527	0.138017
sps	702	710	TIDNFLEKR	1135.61	4.46209	TTd	30	4.08986	0.122611	8.02513
sps	702	710	TIDNFLEKR	1135.61	4.43139	TTd-8E1-1H1	0	0	0
sps	702	710	TIDNFLEKR	1135.61	4.45048	TTd-8E1-1H1	10	4.02383	0.081185
sps	702	710	TIDNFLEKR	1135.61	4.45211	TTd-8E1-1H1	30	4.02596	0.082539	8.04979	-0.024659	0.414051
sps	726	732	LGTVNTQ	732.389	5.30716	TTd	0	0	0
sps	726	732	LGTVNTQ	732.389	5.30419	TTd	10	2.0652	0.090141
sps	726	732	LGTVNTQ	732.389	5.2977	TTd	30	2.03066	0.062738	4.09586
sps	726	732	LGTVNTQ	732.389	5.30716	TTd-8E1-1H1	0	0	0
sps	726	732	LGTVNTQ	732.389	5.30331	TTd-8E1-1H1	10	1.91973	0.069453
sps	726	732	LGTVNTQ	732.389	5.30037	TTd-8E1-1H1	30	2.02518	0.082514	3.94491	0.150948	0.270423
sps	744	752	LEYQVDAIK	1078.58	5.75635	TTd	0	0	0
sps	744	752	LEYQVDAIK	1078.58	5.75646	TTd	10	0.755147	0.064542
sps	744	752	LEYQVDAIK	1078.58	5.75143	TTd	30	0.889588	0.024721	1.64474
sps	744	752	LEYQVDAIK	1078.58	5.75635	TTd-8E1-1H1	0	0	0
sps	744	752	LEYQVDAIK	1078.58	5.74991	TTd-8E1-1H1	10	0.770297	0.02182
sps	744	752	LEYQVDAIK	1078.58	5.74863	TTd-8E1-1H1	30	0.924266	0.027486	1.69456	-0.049828	0.193626
sps	771	778	ADEINNLK	916.473	7.01866	TTd	0	0	0
sps	771	778	ADEINNLK	916.473	7.0133	TTd	10	2.21649	0.031515
sps	771	778	ADEINNLK	916.473	7.01019	TTd	30	2.15437	0.070848	4.37086
sps	771	778	ADEINNLK	916.473	7.01866	TTd-8E1-1H1	0	0	0
sps	771	778	ADEINNLK	916.473	7.0089	TTd-8E1-1H1	10	2.17903	0.013921
sps	771	778	ADEINNLK	916.473	7.01133	TTd-8E1-1H1	30	2.06833	0.186045	4.24736	0.123504	0.558135
sps	804	810	LVNQMIN	831.439	5.58206	TTd	0	0	0
sps	804	810	LVNQMIN	831.439	5.57585	TTd	10	0.705493	0.007298
sps	804	810	LVNQMIN	831.439	5.57531	TTd	30	0.940674	0.005484	1.64617
sps	804	810	LVNQMIN	831.439	5.58206	TTd-8E1-1H1	0	0	0
sps	804	810	LVNQMIN	831.439	5.57607	TTd-8E1-1H1	10	0.57549	0.010413
sps	804	810	LVNQMIN	831.439	5.5771	TTd-8E1-1H1	30	0.843875	0.037464	1.41936	0.226802	0.112392
sps	805	819	VNQMINEAKKQLLEF	1804.96	6.80331	TTd	0	0	0
sps	805	819	VNQMINEAKKQLLEF	1804.96	6.80891	TTd	10	0.561297	0.192626
sps	805	819	VNQMINEAKKQLLEF	1804.96	6.79348	TTd	30	1.36091	0.274699	1.92221
sps	805	819	VNQMINEAKKQLLEF	1804.96	6.80331	TTd-8E1-1H1	0	0	0
sps	805	819	VNQMINEAKKQLLEF	1804.96	6.8014	TTd-8E1-1H1	10	0.647351	0.107144
sps	805	819	VNQMINEAKKQLLEF	1804.96	6.79587	TTd-8E1-1H1	30	1.22753	0.300199	1.87488	0.047325	0.900597
sps	811	819	EAKKQLLEF	1105.63	5.73728	TTd	0	0	0
sps	811	819	EAKKQLLEF	1105.63	5.74162	TTd	10	0.362183	0.153109
sps	811	819	EAKKQLLEF	1105.63	5.73542	TTd	30	0.463009	0.149131	0.825192
sps	811	819	EAKKQLLEF	1105.63	5.73714	TTd-8E1-1H1	0	0	0
sps	811	819	EAKKQLLEF	1105.63	5.74351	TTd-8E1-1H1	10	0.34876	0.03769
sps	811	819	EAKKQLLEF	1105.63	5.73719	TTd-8E1-1H1	30	0.351916	0.111811	0.700676	0.124516	0.459327
sps	812	819	AKKQLLEF	976.583	5.60644	TTd	0	0	0
sps	812	819	AKKQLLEF	976.583	5.6091	TTd	10	0.232351	0.124258
sps	812	819	AKKQLLEF	976.583	5.6036	TTd	30	0.341711	0.113196	0.574062
sps	812	819	AKKQLLEF	976.583	5.60644	TTd-8E1-1H1	0	0	0
sps	812	819	AKKQLLEF	976.583	5.6095	TTd-8E1-1H1	10	0.274519	0.146208
sps	812	819	AKKQLLEF	976.583	5.60478	TTd-8E1-1H1	30	0.331884	0.113114	0.606403	-0.032341	0.438624
sps	820	827	DTQSKNIL	918.489	5.04989	TTd	0	0	0
sps	820	827	DTQSKNIL	918.489	5.06357	TTd	10	0.139975	0.038331
sps	820	827	DTQSKNIL	918.489	5.04422	TTd	30	0.596899	0.031861	0.736874
sps	820	827	DTQSKNIL	918.489	5.04989	TTd-8E1-1H1	0	0	0
sps	820	827	DTQSKNIL	918.489	5.05555	TTd-8E1-1H1	10	0.356003	0.123987
sps	820	827	DTQSKNIL	918.489	5.05428	TTd-8E1-1H1	30	0.575239	0.020194	0.931242	-0.194368	0.371961
sps	828	837	MQYIKANSKF	1229.63	5.0707	TTd	0	0	0
sps	828	837	MQYIKANSKF	1229.63	5.06621	TTd	10	2.05951	0.332292
sps	828	837	MQYIKANSKF	1229.63	5.05846	TTd	30	2.47974	0.143541	4.53925
sps	828	837	MQYIKANSKF	1229.63	5.0707	TTd-8E1-1H1	0	0	0
sps	828	837	MQYIKANSKF	1229.63	5.06729	TTd-8E1-1H1	10	2.24885	0.06961
sps	828	837	MQYIKANSKF	1229.63	5.06537	TTd-8E1-1H1	30	2.43109	0.113924	4.67994	-0.140686	0.996876
sps	878	888	VILKKSTILNL	1241.82	5.82985	TTd	0	0	0
sps	878	888	VILKKSTILNL	1241.82	5.82843	TTd	10	1.32714	0.277289
sps	878	888	VILKKSTILNL	1241.82	5.82296	TTd	30	1.65268	0.154458	2.97982
sps	878	888	VILKKSTILNL	1241.82	5.82985	TTd-8E1-1H1	0	0	0
sps	878	888	VILKKSTILNL	1241.82	5.82973	TTd-8E1-1H1	10	1.46095	0.149231
sps	878	888	VILKKSTILNL	1241.82	5.82632	TTd-8E1-1H1	30	1.67737	0.162773	3.13832	-0.158501	0.831867
sps	881	888	KKSTILNL	916.583	5.28524	TTd	0	0	0
sps	881	888	KKSTILNL	916.583	5.28201	TTd	10	0.360464	0.200116
sps	881	888	KKSTILNL	916.583	5.27568	TTd	30	0.439245	0.165577	0.799709
sps	881	888	KKSTILNL	916.583	5.28524	TTd-8E1-1H1	0	0	0
sps	881	888	KKSTILNL	916.583	5.28621	TTd-8E1-1H1	10	0.362505	0.179279
sps	881	888	KKSTILNL	916.583	5.2831	TTd-8E1-1H1	30	0.37869	0.146819	0.741195	0.058514	0.600348
sps	892	901	NDIISDISGF	1080.52	8.16921	TTd	0	0	0
sps	892	901	NDIISDISGF	1080.52	8.15775	TTd	10	2.13014	0.049869
sps	892	901	NDIISDISGF	1080.52	8.14671	TTd	30	2.61356	0.06906	4.7437
sps	892	901	NDIISDISGF	1080.52	8.16921	TTd-8E1-1H1	0	0	0
sps	892	901	NDIISDISGF	1080.52	8.16136	TTd-8E1-1H1	10	2.14933	0.024357
sps	892	901	NDIISDISGF	1080.52	8.14444	TTd-8E1-1H1	30	2.64412	0.021515	4.79345	-0.049756	0.20718
sps	892	905	NDIISDISGFNSSV	1467.7	7.88323	TTd	0	0	0
sps	892	905	NDIISDISGFNSSV	1467.7	7.8688	TTd	10	3.29983	0.386759
sps	892	905	NDIISDISGFNSSV	1467.7	7.85747	TTd	30	3.95436	0.089993	7.25418
sps	892	905	NDIISDISGFNSSV	1467.7	7.88323	TTd-8E1-1H1	0	0	0
sps	892	905	NDIISDISGFNSSV	1467.7	7.87587	TTd-8E1-1H1	10	3.43141	0.044677
sps	892	905	NDIISDISGFNSSV	1467.7	7.85797	TTd-8E1-1H1	30	4.21747	0.207062	7.64889	-0.394701	1.16028
sps	898	904	ISGFNSS	711.331	5.32668	TTd	0	0	0
sps	898	904	ISGFNSS	711.331	5.32742	TTd	10	1.50605	0.190132
sps	898	904	ISGFNSS	711.331	5.31965	TTd	30	1.82891	0.019503	3.33496
sps	898	904	ISGFNSS	711.331	5.32668	TTd-8E1-1H1	0	0	0
sps	898	904	ISGFNSS	711.331	5.32646	TTd-8E1-1H1	10	1.72276	0.051522
sps	898	904	ISGFNSS	711.331	5.32184	TTd-8E1-1H1	30	1.90309	0.108372	3.62585	-0.290895	0.570396
sps	898	905	ISGFNSSV	810.399	5.97727	TTd	0	0	0
sps	898	905	ISGFNSSV	810.399	5.97378	TTd	10	1.94971	0.179908
sps	898	905	ISGFNSSV	810.399	5.96999	TTd	30	2.24737	0.031255	4.19708
sps	898	905	ISGFNSSV	810.399	5.97727	TTd-8E1-1H1	0	0	0
sps	898	905	ISGFNSSV	810.399	5.97281	TTd-8E1-1H1	10	2.09693	0.019226
sps	898	905	ISGFNSSV	810.399	5.97123	TTd-8E1-1H1	30	2.24763	0.036277	4.34456	-0.147479	0.539724
sps	900	906	GFNSSVI	723.367	5.88848	TTd	0	0	0
sps	900	906	GFNSSVI	723.367	5.88473	TTd	10	2.66093	0.101813
sps	900	906	GFNSSVI	723.367	5.88116	TTd	30	2.46879	0.022882	5.12972
sps	900	906	GFNSSVI	723.367	5.88848	TTd-8E1-1H1	0	0	0
sps	900	906	GFNSSVI	723.367	5.88611	TTd-8E1-1H1	10	2.46652	0.090319
sps	900	906	GFNSSVI	723.367	5.8831	TTd-8E1-1H1	30	2.5531	0.092644	5.01962	0.110105	0.305439
sps	931	939	EVIVHKAMD	1041.54	4.05503	TTd	0	0	0
sps	931	939	EVIVHKAMD	1041.54	3.99301	TTd	10	0.982255	0.091121
sps	931	939	EVIVHKAMD	1041.54	3.99911	TTd	30	1.45842	0.150818	2.44067
sps	931	939	EVIVHKAMD	1041.54	4.05503	TTd-8E1-1H1	0	0	0
sps	931	939	EVIVHKAMD	1041.54	4.00204	TTd-8E1-1H1	10	1.21357	0.152333
sps	931	939	EVIVHKAMD	1041.54	4.00053	TTd-8E1-1H1	30	1.35185	0.054677	2.56541	-0.124743	0.456999
sps	943	949	NDMFNNF	901.351	7.43214	TTd	0	0	0
sps	943	949	NDMFNNF	901.351	7.43077	TTd	10	1.51825	0.041287
sps	943	949	NDMFNNF	901.351	7.42252	TTd	30	1.55595	0.037732	3.0742
sps	943	949	NDMFNNF	901.351	7.43214	TTd-8E1-1H1	0	0	0
sps	943	949	NDMFNNF	901.351	7.42924	TTd-8E1-1H1	10	1.4831	0.021315
sps	943	949	NDMFNNF	901.351	7.42462	TTd-8E1-1H1	30	1.51437	0.040963	2.99747	0.076728	0.123861
sps	954	965	WLRVPKVSASHL	1392.81	5.53302	TTd	0	0	0
sps	954	965	WLRVPKVSASHL	1392.81	5.53153	TTd	10	1.22586	0.154266
sps	954	965	WLRVPKVSASHL	1392.81	5.53009	TTd	30	1.50628	0.072698	2.73214
sps	954	965	WLRVPKVSASHL	1392.81	5.53302	TTd-8E1-1H1	0	0	0
sps	954	965	WLRVPKVSASHL	1392.81	5.53112	TTd-8E1-1H1	10	1.37787	0.05749
sps	954	965	WLRVPKVSASHL	1392.81	5.52964	TTd-8E1-1H1	30	1.55432	0.039383	2.93218	-0.200045	0.462798
sps	954	972	WLRVPKVSASHLEQYGTNE	2214.13	5.7594	TTd	0	0	0
sps	954	972	WLRVPKVSASHLEQYGTNE	2214.13	5.7549	TTd	10	3.89966	0.272718
sps	954	972	WLRVPKVSASHLEQYGTNE	2214.13	5.75115	TTd	30	4.35019	0.214568	8.24985
sps	954	972	WLRVPKVSASHLEQYGTNE	2214.13	5.7594	TTd-8E1-1H1	0	0	0
sps	954	972	WLRVPKVSASHLEQYGTNE	2214.13	5.7543	TTd-8E1-1H1	10	4.02319	0.140183
sps	954	972	WLRVPKVSASHLEQYGTNE	2214.13	5.75074	TTd-8E1-1H1	30	4.39207	0.109362	8.41526	-0.165406	0.818154
sps	955	965	LRVPKVSASHL	1206.73	5.53352	TTd	0	0	0
sps	955	965	LRVPKVSASHL	1206.73	5.53162	TTd	10	1.01802	0.170239
sps	955	965	LRVPKVSASHL	1206.73	5.53024	TTd	30	1.60899	0.183223	2.62701
sps	955	965	LRVPKVSASHL	1206.73	5.53352	TTd-8E1-1H1	0	0	0
sps	955	965	LRVPKVSASHL	1206.73	5.5319	TTd-8E1-1H1	10	1.30022	0.143311
sps	955	965	LRVPKVSASHL	1206.73	5.52944	TTd-8E1-1H1	30	1.59226	0.107515	2.89248	-0.26547	0.549669
sps	966	972	EQYGTNE	840.337	4.54096	TTd	0	0	0
sps	966	972	EQYGTNE	840.337	4.54705	TTd	10	1.79822	0.059964
sps	966	972	EQYGTNE	840.337	4.54445	TTd	30	1.91421	0.078646	3.71242
sps	966	972	EQYGTNE	840.337	4.54096	TTd-8E1-1H1	0	0	0
sps	966	972	EQYGTNE	840.337	4.55073	TTd-8E1-1H1	10	1.80923	0.0107
sps	966	972	EQYGTNE	840.337	4.54344	TTd-8E1-1H1	30	1.96242	0.05459	3.77165	-0.059223	0.235938
sps	973	979	YSIISSM	800.386	7.07601	TTd	0	0	0
sps	973	979	YSIISSM	800.386	7.07728	TTd	10	0.432222	0.069825
sps	973	979	YSIISSM	800.386	7.06906	TTd	30	0.527888	0.017892	0.96011
sps	973	979	YSIISSM	800.386	7.07601	TTd-8E1-1H1	0	0	0
sps	973	979	YSIISSM	800.386	7.07165	TTd-8E1-1H1	10	0.47017	0.028237
sps	973	979	YSIISSM	800.386	7.07123	TTd-8E1-1H1	30	0.484902	0.037854	0.955072	0.005038	0.209475
sps	973	982	YSIISSMKKH	1193.63	4.62588	TTd	0	0	0
sps	973	982	YSIISSMKKH	1193.63	4.64464	TTd	10	1.56003	0.204241
sps	973	982	YSIISSMKKH	1193.63	4.64458	TTd	30	1.66742	0.056433	3.22745
sps	973	982	YSIISSMKKH	1193.63	4.62588	TTd-8E1-1H1	0	0	0
sps	973	982	YSIISSMKKH	1193.63	4.65035	TTd-8E1-1H1	10	1.61977	0.081913
sps	973	982	YSIISSMKKH	1193.63	4.64702	TTd-8E1-1H1	30	1.64936	0.070031	3.26913	-0.041678	0.612723
sps	985	993	SIGSGWSVS	879.421	6.4376	TTd	0	0	0
sps	985	993	SIGSGWSVS	879.421	6.4297	TTd	10	3.40596	0.099437
sps	985	993	SIGSGWSVS	879.421	6.42324	TTd	30	3.34074	0.059224	6.74669
sps	985	993	SIGSGWSVS	879.421	6.4376	TTd-8E1-1H1	0	0	0
sps	985	993	SIGSGWSVS	879.421	6.42776	TTd-8E1-1H1	10	3.33192	0.014245
sps	985	993	SIGSGWSVS	879.421	6.42606	TTd-8E1-1H1	30	3.47636	0.055903	6.80828	-0.061586	0.298311
sps	988	994	SGWSVSL	735.367	6.10604	TTd	0	0	0
sps	988	994	SGWSVSL	735.367	6.10292	TTd	10	2.06406	0.009205
sps	988	994	SGWSVSL	735.367	6.09868	TTd	30	1.99164	0.038196	4.0557
sps	988	994	SGWSVSL	735.367	6.10604	TTd-8E1-1H1	0	0	0
sps	988	994	SGWSVSL	735.367	6.10148	TTd-8E1-1H1	10	1.95108	0.122517
sps	988	994	SGWSVSL	735.367	6.10038	TTd-8E1-1H1	30	1.98202	0.019019	3.9331	0.122602	0.367551
sps	999	1015	LIWTLKDSAGEVRQITF	1977.08	7.07087	TTd	0	0	0
sps	999	1015	LIWTLKDSAGEVRQITF	1977.08	7.07381	TTd	10	2.68222	0.187467
sps	999	1015	LIWTLKDSAGEVRQITF	1977.08	7.06212	TTd	30	3.11217	0.082131	5.79439
sps	999	1015	LIWTLKDSAGEVRQITF	1977.08	7.07087	TTd-8E1-1H1	0	0	0
sps	999	1015	LIWTLKDSAGEVRQITF	1977.08	7.06782	TTd-8E1-1H1	10	2.99453	0.137861
sps	999	1015	LIWTLKDSAGEVRQITF	1977.08	7.06741	TTd-8E1-1H1	30	3.06138	0.070125	6.05591	-0.261518	0.562401
sps	1016	1032	RDLPDKFNAYLANKWVF	2097.09	6.96482	TTd	0	0	0
sps	1016	1032	RDLPDKFNAYLANKWVF	2097.09	6.97466	TTd	10	0.887427	0.287955
sps	1016	1032	RDLPDKFNAYLANKWVF	2097.09	6.95947	TTd	30	1.68749	0.123046	2.57492
sps	1016	1032	RDLPDKFNAYLANKWVF	2097.09	6.96482	TTd-8E1-1H1	0	0	0
sps	1016	1032	RDLPDKFNAYLANKWVF	2097.09	6.96399	TTd-8E1-1H1	10	1.33122	0.127274
sps	1016	1032	RDLPDKFNAYLANKWVF	2097.09	6.96119	TTd-8E1-1H1	30	1.63168	0.170152	2.96289	-0.387977	0.863865
sps	1025	1032	YLANKWVF	1040.56	7.06168	TTd	0	0	0
sps	1025	1032	YLANKWVF	1040.56	7.08333	TTd	10	0.055613	0.009824
sps	1025	1032	YLANKWVF	1040.56	7.05952	TTd	30	0.125359	0.03342	0.180972
sps	1025	1032	YLANKWVF	1040.56	7.06168	TTd-8E1-1H1	0	0	0
sps	1025	1032	YLANKWVF	1040.56	7.0635	TTd-8E1-1H1	10	0.030135	0.028421
sps	1025	1032	YLANKWVF	1040.56	7.06338	TTd-8E1-1H1	30	0.065361	0.03815	0.095496	0.085476	0.11445
sps	1026	1032	LANKWVF	877.493	6.73569	TTd	0	0	0
sps	1026	1032	LANKWVF	877.493	6.74033	TTd	10	0.05571	0.143769
sps	1026	1032	LANKWVF	877.493	6.72731	TTd	30	0.079534	0.122608	0.135244
sps	1026	1032	LANKWVF	877.493	6.73569	TTd-8E1-1H1	0	0	0
sps	1026	1032	LANKWVF	877.493	6.73423	TTd-8E1-1H1	10	0.073784	0.152377
sps	1026	1032	LANKWVF	877.493	6.73083	TTd-8E1-1H1	30	0.025552	0.151276	0.099336	0.035908	0.457131
sps	1033	1040	ITITNDRL	945.536	5.4516	TTd	0	0	0
sps	1033	1040	ITITNDRL	945.536	5.4493	TTd	10	0.570767	0.059898
sps	1033	1040	ITITNDRL	945.536	5.44461	TTd	30	0.686389	0.010374	1.25716
sps	1033	1040	ITITNDRL	945.536	5.4516	TTd-8E1-1H1	0	0	0
sps	1033	1040	ITITNDRL	945.536	5.45074	TTd-8E1-1H1	10	0.646595	0.024662
sps	1033	1040	ITITNDRL	945.536	5.44957	TTd-8E1-1H1	30	0.712627	0.029619	1.35922	-0.102066	0.179694
sps	1033	1045	ITITNDRLSSANL	1417.76	5.92659	TTd	0	0	0
sps	1033	1045	ITITNDRLSSANL	1417.76	5.92454	TTd	10	0.830403	0.134526
sps	1033	1045	ITITNDRLSSANL	1417.76	5.92037	TTd	30	1.0305	0.02386	1.86091
sps	1033	1045	ITITNDRLSSANL	1417.76	5.92659	TTd-8E1-1H1	0	0	0
sps	1033	1045	ITITNDRLSSANL	1417.76	5.92433	TTd-8E1-1H1	10	0.924062	0.034318
sps	1033	1045	ITITNDRLSSANL	1417.76	5.92249	TTd-8E1-1H1	30	0.967971	0.051937	1.89203	-0.031127	0.403578
sps	1034	1040	TITNDRL	832.452	4.39916	TTd	0	0	0
sps	1034	1040	TITNDRL	832.452	4.39103	TTd	10	0.149342	0.088462
sps	1034	1040	TITNDRL	832.452	4.40805	TTd	30	0.192763	0.080887	0.342105
sps	1034	1040	TITNDRL	832.452	4.39916	TTd-8E1-1H1	0	0	0
sps	1034	1040	TITNDRL	832.452	4.40061	TTd-8E1-1H1	10	0.191804	0.081498
sps	1034	1040	TITNDRL	832.452	4.4124	TTd-8E1-1H1	30	0.149812	0.072091	0.341616	0.000489	0.265386
sps	1045	1051	LYINGVL	791.466	7.36476	TTd	0	0	0
sps	1045	1051	LYINGVL	791.466	7.36631	TTd	10	0.704087	0.044009
sps	1045	1051	LYINGVL	791.466	7.35619	TTd	30	0.743205	0.03606	1.44729
sps	1045	1051	LYINGVL	791.466	7.36476	TTd-8E1-1H1	0	0	0
sps	1045	1051	LYINGVL	791.466	7.36309	TTd-8E1-1H1	10	0.888984	0.137174
sps	1045	1051	LYINGVL	791.466	7.36076	TTd-8E1-1H1	30	0.964264	0.009838	1.85325	-0.405956	0.411522
sps	1052	1060	MGSAEITGL	878.429	6.56805	TTd	0	0	0
sps	1052	1060	MGSAEITGL	878.429	6.55945	TTd	10	2.34006	0.105252
sps	1052	1060	MGSAEITGL	878.429	6.55363	TTd	30	2.66684	0.043462	5.0069
sps	1052	1060	MGSAEITGL	878.429	6.56805	TTd-8E1-1H1	0	0	0
sps	1052	1060	MGSAEITGL	878.429	6.55806	TTd-8E1-1H1	10	2.44828	0.021607
sps	1052	1060	MGSAEITGL	878.429	6.55628	TTd-8E1-1H1	30	2.65938	0.064877	5.10766	-0.100766	0.315756
sps	1056	1062	EITGLGA	660.356	5.76033	TTd	0	0	0
sps	1056	1062	EITGLGA	660.356	5.75758	TTd	10	1.46562	0.078384
sps	1056	1062	EITGLGA	660.356	5.75392	TTd	30	1.74838	0.03248	3.214
sps	1056	1062	EITGLGA	660.356	5.76033	TTd-8E1-1H1	0	0	0
sps	1056	1062	EITGLGA	660.356	5.75616	TTd-8E1-1H1	10	1.55798	0.117159
sps	1056	1062	EITGLGA	660.356	5.7546	TTd-8E1-1H1	30	1.7306	0.024322	3.28858	-0.074582	0.351477
sps	1061	1071	GAIREDNNITL	1215.63	5.65496	TTd	0	0	0
sps	1061	1071	GAIREDNNITL	1215.63	5.65384	TTd	10	2.3304	0.235245
sps	1061	1071	GAIREDNNITL	1215.63	5.65158	TTd	30	2.5424	0.078376	4.8728
sps	1061	1071	GAIREDNNITL	1215.63	5.65496	TTd-8E1-1H1	0	0	0
sps	1061	1071	GAIREDNNITL	1215.63	5.65548	TTd-8E1-1H1	10	2.58083	0.082927
sps	1061	1071	GAIREDNNITL	1215.63	5.65054	TTd-8E1-1H1	30	2.67512	0.097191	5.25595	-0.383151	0.705735
sps	1072	1088	KLDRCNNNNQYVSIDKF	2071	5.48437	TTd	0	0	0
sps	1072	1088	KLDRCNNNNQYVSIDKF	2071	5.48012	TTd	10	1.4375	0.340857
sps	1072	1088	KLDRCNNNNQYVSIDKF	2071	5.47828	TTd	30	1.41531	0.303183	2.85281
sps	1072	1088	KLDRCNNNNQYVSIDKF	2071	5.48437	TTd-8E1-1H1	0	0	0
sps	1072	1088	KLDRCNNNNQYVSIDKF	2071	5.48419	TTd-8E1-1H1	10	1.46162	0.076805
sps	1072	1088	KLDRCNNNNQYVSIDKF	2071	5.4804	TTd-8E1-1H1	30	1.47635	0.267326	2.93796	-0.085147	1.02257
sps	1106	1112	SYLSITF	830.429	7.2801	TTd	0	0	0
sps	1106	1112	SYLSITF	830.429	7.27826	TTd	10	1.81043	0.176862
sps	1106	1112	SYLSITF	830.429	7.27057	TTd	30	2.04579	0.007279	3.85622
sps	1106	1112	SYLSITF	830.429	7.2801	TTd-8E1-1H1	0	0	0
sps	1106	1112	SYLSITF	830.429	7.27382	TTd-8E1-1H1	10	1.91565	0.027663
sps	1106	1112	SYLSITF	830.429	7.27226	TTd-8E1-1H1	30	2.00434	0.025586	3.91999	-0.063766	0.530586
sps	1113	1126	LRDFWGNPLRYDTE	1781.86	6.77037	TTd	0	0	0
sps	1113	1126	LRDFWGNPLRYDTE	1781.86	6.77616	TTd	10	0.600179	0.115196
sps	1113	1126	LRDFWGNPLRYDTE	1781.86	6.76458	TTd	30	0.674979	0.044299	1.27516
sps	1113	1126	LRDFWGNPLRYDTE	1781.86	6.77037	TTd-8E1-1H1	0	0	0
sps	1113	1126	LRDFWGNPLRYDTE	1781.86	6.76915	TTd-8E1-1H1	10	0.782014	0.091274
sps	1113	1126	LRDFWGNPLRYDTE	1781.86	6.76673	TTd-8E1-1H1	30	0.697033	0.039202	1.47905	-0.203889	0.345588
sps	1116	1126	FWGNPLRYDTE	1397.65	6.7797	TTd	0	0	0
sps	1116	1126	FWGNPLRYDTE	1397.65	6.78394	TTd	10	0.636896	0.119542
sps	1116	1126	FWGNPLRYDTE	1397.65	6.77385	TTd	30	0.753788	0.049962	1.39068
sps	1116	1126	FWGNPLRYDTE	1397.65	6.7797	TTd-8E1-1H1	0	0	0
sps	1116	1126	FWGNPLRYDTE	1397.65	6.77802	TTd-8E1-1H1	10	0.751721	0.126084
sps	1116	1126	FWGNPLRYDTE	1397.65	6.77605	TTd-8E1-1H1	30	0.710428	0.045423	1.46215	-0.071465	0.378252
sps	1116	1127	FWGNPLRYDTEY	1560.71	7.09945	TTd	0	0	0
sps	1116	1127	FWGNPLRYDTEY	1560.71	7.11404	TTd	10	0.625325	0.124921
sps	1116	1127	FWGNPLRYDTEY	1560.71	7.1027	TTd	30	0.787737	0.080626	1.41306
sps	1116	1127	FWGNPLRYDTEY	1560.71	7.09945	TTd-8E1-1H1	0	0	0
sps	1116	1127	FWGNPLRYDTEY	1560.71	7.1061	TTd-8E1-1H1	10	1.0442	0.10765
sps	1116	1127	FWGNPLRYDTEY	1560.71	7.10575	TTd-8E1-1H1	30	0.955272	0.149512	1.99947	-0.586407	0.448536
sps	1117	1123	WGNPLRY	905.463	6.13094	TTd	0	0	0
sps	1117	1123	WGNPLRY	905.463	6.13427	TTd	10	0.033603	0.019424
sps	1117	1123	WGNPLRY	905.463	6.12743	TTd	30	0.048748	0.024365	0.082351
sps	1117	1123	WGNPLRY	905.463	6.13094	TTd-8E1-1H1	0	0	0
sps	1117	1123	WGNPLRY	905.463	6.13468	TTd-8E1-1H1	10	0.050066	0.041166
sps	1117	1123	WGNPLRY	905.463	6.12725	TTd-8E1-1H1	30	0.02632	0.014777	0.076386	0.005965	0.123498
sps	1127	1148	YYLIPVASSSKDVQLKNITDYM	2548.3	7.1301	TTd	0	0	0
sps	1127	1148	YYLIPVASSSKDVQLKNITDYM	2548.3	7.12908	TTd	10	3.4939	0.206015
sps	1127	1148	YYLIPVASSSKDVQLKNITDYM	2548.3	7.12005	TTd	30	3.67645	0.07694	7.17035
sps	1127	1148	YYLIPVASSSKDVQLKNITDYM	2548.3	7.1301	TTd-8E1-1H1	0	0	0
sps	1127	1148	YYLIPVASSSKDVQLKNITDYM	2548.3	7.12293	TTd-8E1-1H1	10	3.63787	0.053847
sps	1127	1148	YYLIPVASSSKDVQLKNITDYM	2548.3	7.12375	TTd-8E1-1H1	30	3.7794	0.050038	7.41727	-0.246925	0.618045
sps	1128	1141	YLIPVASSSKDVQL	1519.84	6.36501	TTd	0	0	0
sps	1128	1141	YLIPVASSSKDVQL	1519.84	6.3564	TTd	10	1.47908	0.123405
sps	1128	1141	YLIPVASSSKDVQL	1519.84	6.3501	TTd	30	1.63159	0.041659	3.11067
sps	1128	1141	YLIPVASSSKDVQL	1519.84	6.36501	TTd-8E1-1H1	0	0	0
sps	1128	1141	YLIPVASSSKDVQL	1519.84	6.35561	TTd-8E1-1H1	10	1.44949	0.091197
sps	1128	1141	YLIPVASSSKDVQL	1519.84	6.35277	TTd-8E1-1H1	30	1.54671	0.108978	2.9962	0.114471	0.370215
sps	1142	1148	KNITDYM	884.418	6.09029	TTd	0	0	0
sps	1142	1148	KNITDYM	884.418	6.08417	TTd	10	1.64287	0.030165
sps	1142	1148	KNITDYM	884.418	6.078	TTd	30	1.65176	0.072895	3.29463
sps	1142	1148	KNITDYM	884.418	6.09029	TTd-8E1-1H1	0	0	0
sps	1142	1148	KNITDYM	884.418	6.08173	TTd-8E1-1H1	10	1.68041	0.058228
sps	1142	1148	KNITDYM	884.418	6.07705	TTd-8E1-1H1	30	1.72802	0.043137	3.40843	-0.113803	0.218685
sps	1149	1161	YLTNAPSYTNGKL	1441.73	5.632	TTd	0	0	0
sps	1149	1161	YLTNAPSYTNGKL	1441.73	5.62896	TTd	10	3.44597	0.175511
sps	1149	1161	YLTNAPSYTNGKL	1441.73	5.62914	TTd	30	3.68938	0.072621	7.13535
sps	1149	1161	YLTNAPSYTNGKL	1441.73	5.632	TTd-8E1-1H1	0	0	0
sps	1149	1161	YLTNAPSYTNGKL	1441.73	5.62466	TTd-8E1-1H1	10	3.57697	0.117416
sps	1149	1161	YLTNAPSYTNGKL	1441.73	5.62231	TTd-8E1-1H1	30	3.69527	0.128155	7.27224	-0.136891	0.526533
sps	1165	1174	YRRLYNGLKF	1329.74	5.42139	TTd	0	0	0
sps	1165	1174	YRRLYNGLKF	1329.74	5.41933	TTd	10	1.52298	0.188114
sps	1165	1174	YRRLYNGLKF	1329.74	5.41252	TTd	30	1.87114	0.060207	3.39411
sps	1165	1174	YRRLYNGLKF	1329.74	5.42139	TTd-8E1-1H1	0	0	0
sps	1165	1174	YRRLYNGLKF	1329.74	5.41949	TTd-8E1-1H1	10	1.6705	0.036754
sps	1165	1174	YRRLYNGLKF	1329.74	5.41913	TTd-8E1-1H1	30	1.75693	0.1153	3.42743	-0.03332	0.564342
sps	1168	1174	LYNGLKF	854.477	6.28083	TTd	0	0	0
sps	1168	1174	LYNGLKF	854.477	6.28306	TTd	10	0.702937	0.213097
sps	1168	1174	LYNGLKF	854.477	6.27411	TTd	30	0.873103	0.119469	1.57604
sps	1168	1174	LYNGLKF	854.477	6.28083	TTd-8E1-1H1	0	0	0
sps	1168	1174	LYNGLKF	854.477	6.28107	TTd-8E1-1H1	10	0.710441	0.039219
sps	1168	1174	LYNGLKF	854.477	6.27874	TTd-8E1-1H1	30	1.01621	0.133951	1.72665	-0.15061	0.639291
sps	1188	1194	FVKSGDF	799.399	5.14592	TTd	0	0	0
sps	1188	1194	FVKSGDF	799.399	5.14304	TTd	10	0.655559	0.155586
sps	1188	1194	FVKSGDF	799.399	5.13532	TTd	30	0.846447	0.082519	1.50201
sps	1188	1194	FVKSGDF	799.399	5.14592	TTd-8E1-1H1	0	0	0
sps	1188	1194	FVKSGDF	799.399	5.14261	TTd-8E1-1H1	10	0.835556	0.078006
sps	1188	1194	FVKSGDF	799.399	5.14096	TTd-8E1-1H1	30	0.955516	0.081463	1.79107	-0.289066	0.466758
sps	1198	1220	YVSYNNNEHIVGYPKDGNAFNNL	2642.23	6.1711	TTd	0	0	0
sps	1198	1220	YVSYNNNEHIVGYPKDGNAFNNL	2642.23	6.1712	TTd	10	5.09784	0.161966
sps	1198	1220	YVSYNNNEHIVGYPKDGNAFNNL	2642.23	6.16437	TTd	30	5.15291	0.151392	10.2508
sps	1198	1220	YVSYNNNEHIVGYPKDGNAFNNL	2642.23	6.1711	TTd-8E1-1H1	0	0	0
sps	1198	1220	YVSYNNNEHIVGYPKDGNAFNNL	2642.23	6.17234	TTd-8E1-1H1	10	5.05321	0.107566
sps	1198	1220	YVSYNNNEHIVGYPKDGNAFNNL	2642.23	6.1674	TTd-8E1-1H1	30	5.02295	0.273094	10.0762	0.174584	0.819282
sps	1257	1283	YDDKNASLGLVGTHNGQIGNDPNRDIL	2896.42	5.89558	TTd	0	0	0
sps	1257	1283	YDDKNASLGLVGTHNGQIGNDPNRDIL	2896.42	5.89538	TTd	10	4.65096	0.438995
sps	1257	1283	YDDKNASLGLVGTHNGQIGNDPNRDIL	2896.42	5.88878	TTd	30	5.04094	0.130058	9.69189
sps	1257	1283	YDDKNASLGLVGTHNGQIGNDPNRDIL	2896.42	5.89558	TTd-8E1-1H1	0	0	0
sps	1257	1283	YDDKNASLGLVGTHNGQIGNDPNRDIL	2896.42	5.89386	TTd-8E1-1H1	10	4.80228	0.142337
sps	1257	1283	YDDKNASLGLVGTHNGQIGNDPNRDIL	2896.42	5.89096	TTd-8E1-1H1	30	4.91449	0.18513	9.71677	-0.024879	1.31699
sps	1265	1283	GLVGTHNGQIGNDPNRDIL	1990.01	5.58744	TTd	0	0	0
sps	1265	1283	GLVGTHNGQIGNDPNRDIL	1990.01	5.58479	TTd	10	3.31458	0.178238
sps	1265	1283	GLVGTHNGQIGNDPNRDIL	1990.01	5.58433	TTd	30	3.42253	0.070992	6.73711
sps	1265	1283	GLVGTHNGQIGNDPNRDIL	1990.01	5.58744	TTd-8E1-1H1	0	0	0
sps	1265	1283	GLVGTHNGQIGNDPNRDIL	1990.01	5.58557	TTd-8E1-1H1	10	3.34993	0.075351
sps	1265	1283	GLVGTHNGQIGNDPNRDIL	1990.01	5.58268	TTd-8E1-1H1	30	3.34261	0.091166	6.69253	0.044577	0.534714
sps	1267	1283	VGTHNGQIGNDPNRDIL	1819.9	5.13656	TTd	0	0	0
sps	1267	1283	VGTHNGQIGNDPNRDIL	1819.9	5.13251	TTd	10	3.25308	0.164938
sps	1267	1283	VGTHNGQIGNDPNRDIL	1819.9	5.12272	TTd	30	3.34641	0.138212	6.5995
sps	1267	1283	VGTHNGQIGNDPNRDIL	1819.9	5.13656	TTd-8E1-1H1	0	0	0
sps	1267	1283	VGTHNGQIGNDPNRDIL	1819.9	5.13118	TTd-8E1-1H1	10	3.3155	0.065
sps	1267	1283	VGTHNGQIGNDPNRDIL	1819.9	5.12889	TTd-8E1-1H1	30	3.26225	0.122516	6.57775	0.021746	0.494814
sps	1302	1310	WYFVPTDEG	1113.49	7.57018	TTd	0	0	0
sps	1302	1310	WYFVPTDEG	1113.49	7.57051	TTd	10	0.933215	0.115929
sps	1302	1310	WYFVPTDEG	1113.49	7.56422	TTd	30	0.995901	0.071822	1.92912
sps	1302	1310	WYFVPTDEG	1113.49	7.57018	TTd-8E1-1H1	0	0	0
sps	1302	1310	WYFVPTDEG	1113.49	7.57165	TTd-8E1-1H1	10	0.888455	0.057639
sps	1302	1310	WYFVPTDEG	1113.49	7.56409	TTd-8E1-1H1	30	0.840759	0.053066	1.72921	0.199902	0.347787
sps	1303	1310	YFVPTDEG	927.409	6.10711	TTd	0	0	0
sps	1303	1310	YFVPTDEG	927.409	6.10334	TTd	10	0.961964	0.077188
sps	1303	1310	YFVPTDEG	927.409	6.10095	TTd	30	1.05621	0.02375	2.01817
sps	1303	1310	YFVPTDEG	927.409	6.10711	TTd-8E1-1H1	0	0	0
sps	1303	1310	YFVPTDEG	927.409	6.10201	TTd-8E1-1H1	10	0.971068	0.018111
sps	1303	1310	YFVPTDEG	927.409	6.10172	TTd-8E1-1H1	30	1.00252	0.022625	1.97359	0.044587	0.231564
sps	1303	1314	YFVPTDEGWTND	1443.61	7.26382	TTd	0	0	0
sps	1303	1314	YFVPTDEGWTND	1443.61	7.26398	TTd	10	1.8745	0.088973
sps	1303	1314	YFVPTDEGWTND	1443.61	7.25584	TTd	30	1.86146	0.025525	3.73596
sps	1303	1314	YFVPTDEGWTND	1443.61	7.26382	TTd-8E1-1H1	0	0	0
sps	1303	1314	YFVPTDEGWTND	1443.61	7.25935	TTd-8E1-1H1	10	1.85231	0.045151
sps	1303	1314	YFVPTDEGWTND	1443.61	7.25713	TTd-8E1-1H1	30	1.85412	0.02662	3.70643	0.029529	0.266919

## Sheet: TTd-TT010 Difference
Tetanus Toxoid bound to mAb TT010
Protein	Start	End	Sequence	MHP	RT	State	Exposure	Uptake	Uptake SD	Summed Uptake	Difference in Summed Uptake	3*maxSD		Total Sequence Coverage:	72.4	Sequence Redundancy	3.15
sps	1	7	PITINNF	818.441	6.96802	TTd	0	0	0
sps	1	7	PITINNF	818.441	6.96618	TTd	10	2.34493	0.143851
sps	1	7	PITINNF	818.441	6.95849	TTd	30	2.56261	0.087983	4.90754
sps	1	7	PITINNF	818.441	6.96802	TTd-TT010	0	0	0
sps	1	7	PITINNF	818.441	6.96459	TTd-TT010	10	2.41574	0.024969
sps	1	7	PITINNF	818.441	6.95814	TTd-TT010	30	2.61288	0.108085	5.02862	-0.121081	0.431553
sps	6	16	NFRYSDPVNND	1340.59	5.41932	TTd	0	0	0
sps	6	16	NFRYSDPVNND	1340.59	5.41455	TTd	10	2.17278	0.304568
sps	6	16	NFRYSDPVNND	1340.59	5.40897	TTd	30	2.55636	0.075246	4.72914
sps	6	16	NFRYSDPVNND	1340.59	5.41932	TTd-TT010	0	0	0
sps	6	16	NFRYSDPVNND	1340.59	5.41705	TTd-TT010	10	2.35819	0.077508
sps	6	16	NFRYSDPVNND	1340.59	5.40986	TTd-TT010	30	2.48574	0.10694	4.84393	-0.114793	0.913704
sps	6	20	NFRYSDPVNNDTIIM	1798.84	6.76576	TTd	0	0	0
sps	6	20	NFRYSDPVNNDTIIM	1798.84	6.76648	TTd	10	2.20815	0.328507
sps	6	20	NFRYSDPVNNDTIIM	1798.84	6.75574	TTd	30	2.75705	0.101667	4.96521
sps	6	20	NFRYSDPVNNDTIIM	1798.84	6.76576	TTd-TT010	0	0	0
sps	6	20	NFRYSDPVNNDTIIM	1798.84	6.76474	TTd-TT010	10	2.4905	0.099499
sps	6	20	NFRYSDPVNNDTIIM	1798.84	6.75558	TTd-TT010	30	2.68093	0.113523	5.17143	-0.206227	0.985521
sps	7	19	FRYSDPVNNDTII	1553.76	6.50206	TTd	0	0	0
sps	7	19	FRYSDPVNNDTII	1553.76	6.4974	TTd	10	2.02253	0.414969
sps	7	19	FRYSDPVNNDTII	1553.76	6.4898	TTd	30	2.43728	0.061892	4.45981
sps	7	19	FRYSDPVNNDTII	1553.76	6.50206	TTd-TT010	0	0	0
sps	7	19	FRYSDPVNNDTII	1553.76	6.49604	TTd-TT010	10	2.27506	0.060906
sps	7	19	FRYSDPVNNDTII	1553.76	6.48959	TTd-TT010	30	2.64145	0.041872	4.91651	-0.456691	1.24491
sps	8	15	RYSDPVNN	964.448	4.28265	TTd	0	0	0
sps	8	15	RYSDPVNN	964.448	4.28759	TTd	10	1.66327	0.254952
sps	8	15	RYSDPVNN	964.448	4.29301	TTd	30	1.83384	0.087881	3.49711
sps	8	15	RYSDPVNN	964.448	4.28265	TTd-TT010	0	0	0
sps	8	15	RYSDPVNN	964.448	4.30378	TTd-TT010	10	1.88575	0.121311
sps	8	15	RYSDPVNN	964.448	4.29345	TTd-TT010	30	1.84366	0.093943	3.72941	-0.232303	0.764856
sps	8	16	RYSDPVNND	1079.48	4.48346	TTd	0	0	0
sps	8	16	RYSDPVNND	1079.48	4.49219	TTd	10	1.67857	0.233744
sps	8	16	RYSDPVNND	1079.48	4.50181	TTd	30	1.73767	0.157156	3.41624
sps	8	16	RYSDPVNND	1079.48	4.48346	TTd-TT010	0	0	0
sps	8	16	RYSDPVNND	1079.48	4.50904	TTd-TT010	10	1.66251	0.148419
sps	8	16	RYSDPVNND	1079.48	4.5012	TTd-TT010	30	1.74232	0.167491	3.40482	0.011417	0.701232
sps	8	19	RYSDPVNNDTII	1406.69	6.00753	TTd	0	0	0
sps	8	19	RYSDPVNNDTII	1406.69	6.00173	TTd	10	1.59927	0.143679
sps	8	19	RYSDPVNNDTII	1406.69	5.99464	TTd	30	1.83569	0.034297	3.43496
sps	8	19	RYSDPVNNDTII	1406.69	6.00753	TTd-TT010	0	0	0
sps	8	19	RYSDPVNNDTII	1406.69	6.00239	TTd-TT010	10	1.62691	0.036766
sps	8	19	RYSDPVNNDTII	1406.69	5.99767	TTd-TT010	30	1.78263	0.053999	3.40954	0.025419	0.431037
sps	21	27	MEPPYCK	867.374	4.89741	TTd	0	0	0
sps	21	27	MEPPYCK	867.374	4.89581	TTd	10	0.524102	0.179401
sps	21	27	MEPPYCK	867.374	4.88802	TTd	30	0.761644	0.047143	1.28575
sps	21	27	MEPPYCK	867.374	4.89741	TTd-TT010	0	0	0
sps	21	27	MEPPYCK	867.374	4.8994	TTd-TT010	10	0.656352	0.019722
sps	21	27	MEPPYCK	867.374	4.89147	TTd-TT010	30	0.7569	0.030188	1.41325	-0.127506	0.538203
sps	31	43	IYYKAFKITDRIW	1716.95	6.47708	TTd	0	0	0
sps	31	43	IYYKAFKITDRIW	1716.95	6.48124	TTd	10	0.483156	0.113392
sps	31	43	IYYKAFKITDRIW	1716.95	6.46547	TTd	30	0.755992	0.104621	1.23915
sps	31	43	IYYKAFKITDRIW	1716.95	6.47708	TTd-TT010	0	0	0
sps	31	43	IYYKAFKITDRIW	1716.95	6.47475	TTd-TT010	10	0.606287	0.082998
sps	31	43	IYYKAFKITDRIW	1716.95	6.46611	TTd-TT010	30	0.808767	0.069117	1.41505	-0.175906	0.340176
sps	33	43	YKAFKITDRIW	1440.8	6.13201	TTd	0	0	0
sps	33	43	YKAFKITDRIW	1440.8	6.13874	TTd	10	0.414097	0.099912
sps	33	43	YKAFKITDRIW	1440.8	6.12758	TTd	30	0.629881	0.07999	1.04398
sps	33	43	YKAFKITDRIW	1440.8	6.13201	TTd-TT010	0	0	0
sps	33	43	YKAFKITDRIW	1440.8	6.13782	TTd-TT010	10	0.461427	0.100239
sps	33	43	YKAFKITDRIW	1440.8	6.11329	TTd-TT010	30	0.622902	0.104675	1.08433	-0.040351	0.314025
sps	36	43	FKITDRIW	1078.6	6.43074	TTd	0	0	0
sps	36	43	FKITDRIW	1078.6	6.43089	TTd	10	0.430381	0.26548
sps	36	43	FKITDRIW	1078.6	6.41974	TTd	30	0.599651	0.235619	1.03003
sps	36	43	FKITDRIW	1078.6	6.43074	TTd-TT010	0	0	0
sps	36	43	FKITDRIW	1078.6	6.42916	TTd-TT010	10	0.449141	0.230191
sps	36	43	FKITDRIW	1078.6	6.42001	TTd-TT010	30	0.568236	0.206778	1.01738	0.012655	0.79644
sps	41	64	RIWIVPERYEFGTKPEDFNPPSSL	2877.46	6.6753	TTd	0	0	0
sps	41	64	RIWIVPERYEFGTKPEDFNPPSSL	2877.46	6.68016	TTd	10	3.09906	0.425777
sps	41	64	RIWIVPERYEFGTKPEDFNPPSSL	2877.46	6.66697	TTd	30	3.90343	0.237505	7.00249
sps	41	64	RIWIVPERYEFGTKPEDFNPPSSL	2877.46	6.6753	TTd-TT010	0	0	0
sps	41	64	RIWIVPERYEFGTKPEDFNPPSSL	2877.46	6.67516	TTd-TT010	10	3.37698	0.128344
sps	41	64	RIWIVPERYEFGTKPEDFNPPSSL	2877.46	6.66667	TTd-TT010	30	3.89735	0.275336	7.27433	-0.271838	1.27733
sps	42	48	IWIVPER	912.53	6.10418	TTd	0	0	0
sps	42	48	IWIVPER	912.53	6.10483	TTd	10	0.211686	0.101138
sps	42	48	IWIVPER	912.53	6.09809	TTd	30	0.321026	0.082389	0.532712
sps	42	48	IWIVPER	912.53	6.10418	TTd-TT010	0	0	0
sps	42	48	IWIVPER	912.53	6.10765	TTd-TT010	10	0.228071	0.097849
sps	42	48	IWIVPER	912.53	6.09961	TTd-TT010	30	0.343919	0.085434	0.57199	-0.039278	0.303414
sps	42	64	IWIVPERYEFGTKPEDFNPPSSL	2721.36	7.05337	TTd	0	0	0
sps	42	64	IWIVPERYEFGTKPEDFNPPSSL	2721.36	7.06089	TTd	10	2.86412	0.261654
sps	42	64	IWIVPERYEFGTKPEDFNPPSSL	2721.36	7.04879	TTd	30	3.57068	0.203322	6.4348
sps	42	64	IWIVPERYEFGTKPEDFNPPSSL	2721.36	7.05337	TTd-TT010	0	0	0
sps	42	64	IWIVPERYEFGTKPEDFNPPSSL	2721.36	7.05665	TTd-TT010	10	3.11786	0.172593
sps	42	64	IWIVPERYEFGTKPEDFNPPSSL	2721.36	7.05026	TTd-TT010	30	3.39907	0.161377	6.51693	-0.082129	0.784962
sps	43	64	WIVPERYEFGTKPEDFNPPSSL	2608.27	6.8826	TTd	0	0	0
sps	43	64	WIVPERYEFGTKPEDFNPPSSL	2608.27	6.88751	TTd	10	2.9856	0.321763
sps	43	64	WIVPERYEFGTKPEDFNPPSSL	2608.27	6.87587	TTd	30	3.6377	0.13995	6.6233
sps	43	64	WIVPERYEFGTKPEDFNPPSSL	2608.27	6.8826	TTd-TT010	0	0	0
sps	43	64	WIVPERYEFGTKPEDFNPPSSL	2608.27	6.88267	TTd-TT010	10	3.19392	0.095346
sps	43	64	WIVPERYEFGTKPEDFNPPSSL	2608.27	6.87696	TTd-TT010	30	3.66475	0.153471	6.85867	-0.235368	0.965289
sps	44	50	IVPERYE	905.473	4.74381	TTd	0	0	0
sps	44	50	IVPERYE	905.473	4.74728	TTd	10	0.549287	0.214513
sps	44	50	IVPERYE	905.473	4.74182	TTd	30	0.711533	0.056552	1.26082
sps	44	50	IVPERYE	905.473	4.74381	TTd-TT010	0	0	0
sps	44	50	IVPERYE	905.473	4.75172	TTd-TT010	10	0.61592	0.051128
sps	44	50	IVPERYE	905.473	4.74318	TTd-TT010	30	0.71685	0.055989	1.33277	-0.07195	0.643539
sps	44	51	IVPERYEF	1052.54	6.04884	TTd	0	0	0
sps	44	51	IVPERYEF	1052.54	6.04859	TTd	10	0.860903	0.173972
sps	44	51	IVPERYEF	1052.54	6.04192	TTd	30	1.26548	0.105358	2.12639
sps	44	51	IVPERYEF	1052.54	6.04884	TTd-TT010	0	0	0
sps	44	51	IVPERYEF	1052.54	6.05379	TTd-TT010	10	0.972571	0.114158
sps	44	51	IVPERYEF	1052.54	6.04466	TTd-TT010	30	1.1668	0.144558	2.13937	-0.012983	0.521916
sps	44	57	IVPERYEFGTKPED	1679.83	5.24671	TTd	0	0	0
sps	44	57	IVPERYEFGTKPED	1679.83	5.244	TTd	10	2.20695	0.289888
sps	44	57	IVPERYEFGTKPED	1679.83	5.23813	TTd	30	2.67457	0.086077	4.88152
sps	44	57	IVPERYEFGTKPED	1679.83	5.24671	TTd-TT010	0	0	0
sps	44	57	IVPERYEFGTKPED	1679.83	5.24649	TTd-TT010	10	2.39272	0.187327
sps	44	57	IVPERYEFGTKPED	1679.83	5.23986	TTd-TT010	30	2.63639	0.153747	5.02911	-0.147589	0.869664
sps	44	64	IVPERYEFGTKPEDFNPPSSL	2422.19	6.32979	TTd	0	0	0
sps	44	64	IVPERYEFGTKPEDFNPPSSL	2422.19	6.32215	TTd	10	2.93426	0.357202
sps	44	64	IVPERYEFGTKPEDFNPPSSL	2422.19	6.31567	TTd	30	3.61162	0.141222	6.54588
sps	44	64	IVPERYEFGTKPEDFNPPSSL	2422.19	6.32979	TTd-TT010	0	0	0
sps	44	64	IVPERYEFGTKPEDFNPPSSL	2422.19	6.32565	TTd-TT010	10	3.18752	0.139544
sps	44	64	IVPERYEFGTKPEDFNPPSSL	2422.19	6.32073	TTd-TT010	30	3.65198	0.145037	6.83949	-0.293615	1.07161
sps	49	64	YEFGTKPEDFNPPSSL	1827.84	6.60674	TTd	0	0	0
sps	49	64	YEFGTKPEDFNPPSSL	1827.84	6.60166	TTd	10	2.44523	0.23327
sps	49	64	YEFGTKPEDFNPPSSL	1827.84	6.59455	TTd	30	2.88137	0.034405	5.3266
sps	49	64	YEFGTKPEDFNPPSSL	1827.84	6.60674	TTd-TT010	0	0	0
sps	49	64	YEFGTKPEDFNPPSSL	1827.84	6.60108	TTd-TT010	10	2.56604	0.01393
sps	49	64	YEFGTKPEDFNPPSSL	1827.84	6.5964	TTd-TT010	30	2.90282	0.040404	5.46886	-0.14226	0.69981
sps	52	64	GTKPEDFNPPSSL	1388.67	5.79187	TTd	0	0	0
sps	52	64	GTKPEDFNPPSSL	1388.67	5.79186	TTd	10	1.55255	0.120744
sps	52	64	GTKPEDFNPPSSL	1388.67	5.7875	TTd	30	1.85252	0.039003	3.40507
sps	52	64	GTKPEDFNPPSSL	1388.67	5.79187	TTd-TT010	0	0	0
sps	52	64	GTKPEDFNPPSSL	1388.67	5.79192	TTd-TT010	10	1.64727	0.045436
sps	52	64	GTKPEDFNPPSSL	1388.67	5.78543	TTd-TT010	30	1.83593	0.033895	3.4832	-0.078135	0.362232
sps	57	64	DFNPPSSL	876.41	6.64021	TTd	0	0	0
sps	57	64	DFNPPSSL	876.41	6.63343	TTd	10	0.974415	0.07862
sps	57	64	DFNPPSSL	876.41	6.62949	TTd	30	1.1622	0.015459	2.13661
sps	57	64	DFNPPSSL	876.41	6.64021	TTd-TT010	0	0	0
sps	57	64	DFNPPSSL	876.41	6.63453	TTd-TT010	10	1.03835	0.01574
sps	57	64	DFNPPSSL	876.41	6.63001	TTd-TT010	30	1.19503	0.015747	2.23338	-0.096767	0.23586
sps	58	64	FNPPSSL	761.383	6.16011	TTd	0	0	0
sps	58	64	FNPPSSL	761.383	6.15796	TTd	10	1.00519	0.098135
sps	58	64	FNPPSSL	761.383	6.15427	TTd	30	1.13049	0.011469	2.13568
sps	58	64	FNPPSSL	761.383	6.16011	TTd-TT010	0	0	0
sps	58	64	FNPPSSL	761.383	6.16023	TTd-TT010	10	1.04013	0.017053
sps	58	64	FNPPSSL	761.383	6.15389	TTd-TT010	30	1.1526	0.008963	2.19273	-0.057057	0.294405
sps	71	77	YYDPNYL	947.414	6.85279	TTd	0	0	0
sps	71	77	YYDPNYL	947.414	6.84936	TTd	10	1.13328	0.169657
sps	71	77	YYDPNYL	947.414	6.84213	TTd	30	1.3216	0.036503	2.45488
sps	71	77	YYDPNYL	947.414	6.85279	TTd-TT010	0	0	0
sps	71	77	YYDPNYL	947.414	6.85011	TTd-TT010	10	1.22584	0.056946
sps	71	77	YYDPNYL	947.414	6.84263	TTd-TT010	30	1.4646	0.035361	2.69044	-0.235555	0.508971
sps	71	78	YYDPNYLR	1103.52	5.6136	TTd	0	0	0
sps	71	78	YYDPNYLR	1103.52	5.6103	TTd	10	1.45072	0.216658
sps	71	78	YYDPNYLR	1103.52	5.60899	TTd	30	1.83638	0.040824	3.2871
sps	71	78	YYDPNYLR	1103.52	5.6136	TTd-TT010	0	0	0
sps	71	78	YYDPNYLR	1103.52	5.61314	TTd-TT010	10	1.6855	0.088069
sps	71	78	YYDPNYLR	1103.52	5.60595	TTd-TT010	30	1.78513	0.062974	3.47063	-0.183528	0.649974
sps	71	79	YYDPNYLRT	1204.56	5.68864	TTd	0	0	0
sps	71	79	YYDPNYLRT	1204.56	5.68691	TTd	10	2.19979	0.174642
sps	71	79	YYDPNYLRT	1204.56	5.68426	TTd	30	2.50254	0.022055	4.70233
sps	71	79	YYDPNYLRT	1204.56	5.68864	TTd-TT010	0	0	0
sps	71	79	YYDPNYLRT	1204.56	5.68755	TTd-TT010	10	2.37695	0.043982
sps	71	79	YYDPNYLRT	1204.56	5.68127	TTd-TT010	30	2.49714	0.063111	4.8741	-0.171767	0.523926
sps	71	80	YYDPNYLRTD	1319.59	5.75636	TTd	0	0	0
sps	71	80	YYDPNYLRTD	1319.59	5.75412	TTd	10	2.03126	0.222513
sps	71	80	YYDPNYLRTD	1319.59	5.74923	TTd	30	2.37607	0.039932	4.40733
sps	71	80	YYDPNYLRTD	1319.59	5.75636	TTd-TT010	0	0	0
sps	71	80	YYDPNYLRTD	1319.59	5.75593	TTd-TT010	10	2.23336	0.024016
sps	71	80	YYDPNYLRTD	1319.59	5.74784	TTd-TT010	30	2.36232	0.105917	4.59568	-0.18835	0.667539
sps	71	86	YYDPNYLRTDSDKDRF	2067.94	5.56845	TTd	0	0	0
sps	71	86	YYDPNYLRTDSDKDRF	2067.94	5.56669	TTd	10	2.19789	0.312833
sps	71	86	YYDPNYLRTDSDKDRF	2067.94	5.56478	TTd	30	2.59855	0.20253	4.79644
sps	71	86	YYDPNYLRTDSDKDRF	2067.94	5.56845	TTd-TT010	0	0	0
sps	71	86	YYDPNYLRTDSDKDRF	2067.94	5.56812	TTd-TT010	10	2.40336	0.189695
sps	71	86	YYDPNYLRTDSDKDRF	2067.94	5.56096	TTd-TT010	30	2.65774	0.246403	5.0611	-0.264664	0.938499
sps	71	89	YYDPNYLRTDSDKDRFLQT	2410.13	5.84606	TTd	0	0	0
sps	71	89	YYDPNYLRTDSDKDRFLQT	2410.13	5.84565	TTd	10	2.25382	0.314252
sps	71	89	YYDPNYLRTDSDKDRFLQT	2410.13	5.83923	TTd	30	2.65551	0.190514	4.90933
sps	71	89	YYDPNYLRTDSDKDRFLQT	2410.13	5.84606	TTd-TT010	0	0	0
sps	71	89	YYDPNYLRTDSDKDRFLQT	2410.13	5.84823	TTd-TT010	10	2.44226	0.178342
sps	71	89	YYDPNYLRTDSDKDRFLQT	2410.13	5.84134	TTd-TT010	30	2.66619	0.211848	5.10845	-0.19912	0.942756
sps	71	90	YYDPNYLRTDSDKDRFLQTM	2541.17	6.23233	TTd	0	0	0
sps	71	90	YYDPNYLRTDSDKDRFLQTM	2541.17	6.23022	TTd	10	2.14328	0.33001
sps	71	90	YYDPNYLRTDSDKDRFLQTM	2541.17	6.2227	TTd	30	2.56045	0.202792	4.70372
sps	71	90	YYDPNYLRTDSDKDRFLQTM	2541.17	6.23233	TTd-TT010	0	0	0
sps	71	90	YYDPNYLRTDSDKDRFLQTM	2541.17	6.23074	TTd-TT010	10	2.42045	0.19066
sps	71	90	YYDPNYLRTDSDKDRFLQTM	2541.17	6.22433	TTd-TT010	30	2.63563	0.202877	5.05608	-0.35236	0.99003
sps	73	86	DPNYLRTDSDKDRF	1741.81	5.57008	TTd	0	0	0
sps	73	86	DPNYLRTDSDKDRF	1741.81	5.56904	TTd	10	1.69478	0.325004
sps	73	86	DPNYLRTDSDKDRF	1741.81	5.56747	TTd	30	1.90014	0.235228	3.59492
sps	73	86	DPNYLRTDSDKDRF	1741.81	5.57008	TTd-TT010	0	0	0
sps	73	86	DPNYLRTDSDKDRF	1741.81	5.57069	TTd-TT010	10	2.23305	0.113059
sps	73	86	DPNYLRTDSDKDRF	1741.81	5.56383	TTd-TT010	30	1.91098	0.17303	4.14403	-0.549107	0.975012
sps	74	89	PNYLRTDSDKDRFLQT	1968.98	5.85058	TTd	0	0	0
sps	74	89	PNYLRTDSDKDRFLQT	1968.98	5.85406	TTd	10	0.465915	0.141932
sps	74	89	PNYLRTDSDKDRFLQT	1968.98	5.84222	TTd	30	0.603702	0.201612	1.06962
sps	74	89	PNYLRTDSDKDRFLQT	1968.98	5.85058	TTd-TT010	0	0	0
sps	74	89	PNYLRTDSDKDRFLQT	1968.98	5.85306	TTd-TT010	10	0.415572	0.389085
sps	74	89	PNYLRTDSDKDRFLQT	1968.98	5.84505	TTd-TT010	30	0.521118	0.181103	0.93669	0.132927	1.16725
sps	77	89	LRTDSDKDRFLQT	1594.82	4.7227	TTd	0	0	0
sps	77	89	LRTDSDKDRFLQT	1594.82	4.73076	TTd	10	0.698336	0.161081
sps	77	89	LRTDSDKDRFLQT	1594.82	4.72328	TTd	30	0.791015	0.195342	1.48935
sps	77	89	LRTDSDKDRFLQT	1594.82	4.72333	TTd-TT010	0	0	0
sps	77	89	LRTDSDKDRFLQT	1594.82	4.73333	TTd-TT010	10	0.673071	0.041677
sps	77	89	LRTDSDKDRFLQT	1594.82	4.72264	TTd-TT010	30	0.720007	0.048322	1.39308	0.096273	0.586026
sps	90	96	MVKLFNR	907.518	5.07536	TTd	0	0	0
sps	90	96	MVKLFNR	907.518	5.07609	TTd	10	0.131571	0.186977
sps	90	96	MVKLFNR	907.518	5.06564	TTd	30	0.14353	0.180543	0.275101
sps	90	96	MVKLFNR	907.518	5.07536	TTd-TT010	0	0	0
sps	90	96	MVKLFNR	907.518	5.07745	TTd-TT010	10	0.252392	0.302223
sps	90	96	MVKLFNR	907.518	5.06871	TTd-TT010	30	0.130781	0.177643	0.383173	-0.108072	0.906669
sps	90	106	MVKLFNRIKNNVAGEAL	1917.07	5.91573	TTd	0	0	0
sps	90	106	MVKLFNRIKNNVAGEAL	1917.07	5.91528	TTd	10	1.02338	0.107662
sps	90	106	MVKLFNRIKNNVAGEAL	1917.07	5.90822	TTd	30	1.10477	0.081393	2.12815
sps	90	106	MVKLFNRIKNNVAGEAL	1917.07	5.91573	TTd-TT010	0	0	0
sps	90	106	MVKLFNRIKNNVAGEAL	1917.07	5.91698	TTd-TT010	10	1.09366	0.086261
sps	90	106	MVKLFNRIKNNVAGEAL	1917.07	5.9085	TTd-TT010	30	1.14841	0.087711	2.24207	-0.113914	0.322986
sps	90	107	MVKLFNRIKNNVAGEALL	2030.16	6.29	TTd	0	0	0
sps	90	107	MVKLFNRIKNNVAGEALL	2030.16	6.29128	TTd	10	1.17199	0.132266
sps	90	107	MVKLFNRIKNNVAGEALL	2030.16	6.27988	TTd	30	1.23824	0.154221	2.41023
sps	90	107	MVKLFNRIKNNVAGEALL	2030.16	6.29	TTd-TT010	0	0	0
sps	90	107	MVKLFNRIKNNVAGEALL	2030.16	6.2888	TTd-TT010	10	1.22293	0.16157
sps	90	107	MVKLFNRIKNNVAGEALL	2030.16	6.27945	TTd-TT010	30	1.26718	0.197594	2.4901	-0.079878	0.592782
sps	94	106	FNRIKNNVAGEAL	1445.79	5.04516	TTd	0	0	0
sps	94	106	FNRIKNNVAGEAL	1445.79	5.03449	TTd	10	0.841863	0.109642
sps	94	106	FNRIKNNVAGEAL	1445.79	5.03217	TTd	30	0.909116	0.10634	1.75098
sps	94	106	FNRIKNNVAGEAL	1445.79	5.04516	TTd-TT010	0	0	0
sps	94	106	FNRIKNNVAGEAL	1445.79	5.04271	TTd-TT010	10	0.948113	0.138811
sps	94	106	FNRIKNNVAGEAL	1445.79	5.0371	TTd-TT010	30	0.966243	0.134087	1.91436	-0.163377	0.416433
sps	94	107	FNRIKNNVAGEALL	1558.87	5.60682	TTd	0	0	0
sps	94	107	FNRIKNNVAGEALL	1558.87	5.60613	TTd	10	1.00581	0.097971
sps	94	107	FNRIKNNVAGEALL	1558.87	5.60361	TTd	30	1.08527	0.07097	2.09108
sps	94	107	FNRIKNNVAGEALL	1558.87	5.60682	TTd-TT010	0	0	0
sps	94	107	FNRIKNNVAGEALL	1558.87	5.60889	TTd-TT010	10	1.02268	0.067958
sps	94	107	FNRIKNNVAGEALL	1558.87	5.60086	TTd-TT010	30	1.03855	0.078139	2.06123	0.029856	0.293913
sps	97	106	IKNNVAGEAL	1028.57	4.98178	TTd	0	0	0
sps	97	106	IKNNVAGEAL	1028.57	4.97593	TTd	10	0.947139	0.153434
sps	97	106	IKNNVAGEAL	1028.57	4.96933	TTd	30	0.991416	0.147775	1.93856
sps	97	106	IKNNVAGEAL	1028.57	4.98178	TTd-TT010	0	0	0
sps	97	106	IKNNVAGEAL	1028.57	4.98071	TTd-TT010	10	0.946036	0.158487
sps	97	106	IKNNVAGEAL	1028.57	4.97357	TTd-TT010	30	1.02914	0.163071	1.97517	-0.036618	0.489213
sps	97	107	IKNNVAGEALL	1141.66	5.81311	TTd	0	0	0
sps	97	107	IKNNVAGEALL	1141.66	5.80974	TTd	10	0.957094	0.048416
sps	97	107	IKNNVAGEALL	1141.66	5.80574	TTd	30	1.02324	0.012189	1.98034
sps	97	107	IKNNVAGEALL	1141.66	5.81311	TTd-TT010	0	0	0
sps	97	107	IKNNVAGEALL	1141.66	5.83938	TTd-TT010	10	1.14242	0.080691
sps	97	107	IKNNVAGEALL	1141.66	5.83676	TTd-TT010	30	1.35956	0.004936	2.50198	-0.521647	0.242073
sps	107	120	LDKIINAIPYLGNS	1530.85	6.9467	TTd	0	0	0
sps	107	120	LDKIINAIPYLGNS	1530.85	6.95074	TTd	10	0.841487	0.12008
sps	107	120	LDKIINAIPYLGNS	1530.85	6.9421	TTd	30	0.999013	0.01089	1.8405
sps	107	120	LDKIINAIPYLGNS	1530.85	6.9467	TTd-TT010	0	0	0
sps	107	120	LDKIINAIPYLGNS	1530.85	6.9476	TTd-TT010	10	0.925709	0.011338
sps	107	120	LDKIINAIPYLGNS	1530.85	6.94244	TTd-TT010	30	0.984658	0.024656	1.91037	-0.069867	0.36024
sps	108	120	DKIINAIPYLGNS	1417.77	6.82471	TTd	0	0	0
sps	108	120	DKIINAIPYLGNS	1417.77	6.82395	TTd	10	0.812959	0.11797
sps	108	120	DKIINAIPYLGNS	1417.77	6.8161	TTd	30	1.01386	0.018765	1.82682
sps	108	120	DKIINAIPYLGNS	1417.77	6.82471	TTd-TT010	0	0	0
sps	108	120	DKIINAIPYLGNS	1417.77	6.82311	TTd-TT010	10	0.9406	0.04208
sps	108	120	DKIINAIPYLGNS	1417.77	6.81748	TTd-TT010	30	0.912176	0.025223	1.85278	-0.025954	0.35391
sps	113	119	AIPYLGN	747.404	6.49589	TTd	0	0	0
sps	113	119	AIPYLGN	747.404	6.48915	TTd	10	0.350135	0.087172
sps	113	119	AIPYLGN	747.404	6.48496	TTd	30	0.450273	0.047893	0.800408
sps	113	119	AIPYLGN	747.404	6.49589	TTd-TT010	0	0	0
sps	113	119	AIPYLGN	747.404	6.49015	TTd-TT010	10	0.337874	0.042791
sps	113	119	AIPYLGN	747.404	6.48607	TTd-TT010	30	0.395582	0.068089	0.733456	0.066952	0.261516
sps	113	120	AIPYLGNS	834.436	6.45345	TTd	0	0	0
sps	113	120	AIPYLGNS	834.436	6.44608	TTd	10	0.666188	0.089666
sps	113	120	AIPYLGNS	834.436	6.44191	TTd	30	0.783073	0.017124	1.44926
sps	113	120	AIPYLGNS	834.436	6.45345	TTd-TT010	0	0	0
sps	113	120	AIPYLGNS	834.436	6.44783	TTd-TT010	10	0.706708	0.051871
sps	113	120	AIPYLGNS	834.436	6.4433	TTd-TT010	30	0.770849	0.042822	1.47756	-0.028296	0.268998
sps	124	136	LDKFDTNSNSVSF	1473.69	6.10666	TTd	0	0	0
sps	124	136	LDKFDTNSNSVSF	1473.69	6.10544	TTd	10	1.35453	0.158396
sps	124	136	LDKFDTNSNSVSF	1473.69	6.10114	TTd	30	1.73118	0.051877	3.08571
sps	124	136	LDKFDTNSNSVSF	1473.69	6.10666	TTd-TT010	0	0	0
sps	124	136	LDKFDTNSNSVSF	1473.69	6.10895	TTd-TT010	10	1.54913	0.071441
sps	124	136	LDKFDTNSNSVSF	1473.69	6.10295	TTd-TT010	30	1.72781	0.071854	3.27694	-0.191227	0.475188
sps	125	136	DKFDTNSNSVSF	1360.6	6.03167	TTd	0	0	0
sps	125	136	DKFDTNSNSVSF	1360.6	6.0275	TTd	10	1.13177	0.138753
sps	125	136	DKFDTNSNSVSF	1360.6	6.02446	TTd	30	1.33126	0.039984	2.46304
sps	125	136	DKFDTNSNSVSF	1360.6	6.03167	TTd-TT010	0	0	0
sps	125	136	DKFDTNSNSVSF	1360.6	6.03377	TTd-TT010	10	1.22448	0.038187
sps	125	136	DKFDTNSNSVSF	1360.6	6.0272	TTd-TT010	30	1.33773	0.051272	2.56222	-0.099181	0.416259
sps	125	138	DKFDTNSNSVSFNL	1587.73	6.75476	TTd	0	0	0
sps	125	138	DKFDTNSNSVSFNL	1587.73	6.75813	TTd	10	1.23994	0.188616
sps	125	138	DKFDTNSNSVSFNL	1587.73	6.74704	TTd	30	1.58056	0.076071	2.8205
sps	125	138	DKFDTNSNSVSFNL	1587.73	6.75476	TTd-TT010	0	0	0
sps	125	138	DKFDTNSNSVSFNL	1587.73	6.75534	TTd-TT010	10	1.43698	0.046521
sps	125	138	DKFDTNSNSVSFNL	1587.73	6.74672	TTd-TT010	30	1.62743	0.07825	3.06441	-0.243911	0.565848
sps	137	152	NLLEQDPSGATTKSAM	1662.8	5.59427	TTd	0	0	0
sps	137	152	NLLEQDPSGATTKSAM	1662.8	5.5906	TTd	10	4.05138	0.171058
sps	137	152	NLLEQDPSGATTKSAM	1662.8	5.58793	TTd	30	4.52041	0.064149	8.57179
sps	137	152	NLLEQDPSGATTKSAM	1662.8	5.59427	TTd-TT010	0	0	0
sps	137	152	NLLEQDPSGATTKSAM	1662.8	5.59064	TTd-TT010	10	4.28153	0.045532
sps	137	152	NLLEQDPSGATTKSAM	1662.8	5.58403	TTd-TT010	30	4.50012	0.050056	8.78164	-0.209856	0.513174
sps	137	153	NLLEQDPSGATTKSAML	1775.88	6.52464	TTd	0	0	0
sps	137	153	NLLEQDPSGATTKSAML	1775.88	6.51779	TTd	10	4.11377	0.453914
sps	137	153	NLLEQDPSGATTKSAML	1775.88	6.51305	TTd	30	4.66784	0.037377	8.78161
sps	137	153	NLLEQDPSGATTKSAML	1775.88	6.52464	TTd-TT010	0	0	0
sps	137	153	NLLEQDPSGATTKSAML	1775.88	6.51708	TTd-TT010	10	4.49758	0.043966
sps	137	153	NLLEQDPSGATTKSAML	1775.88	6.5116	TTd-TT010	30	4.67539	0.027715	9.17297	-0.391365	1.36174
sps	139	152	LEQDPSGATTKSAM	1435.67	4.5976	TTd	0	0	0
sps	139	152	LEQDPSGATTKSAM	1435.67	4.60077	TTd	10	3.68282	0.086067
sps	139	152	LEQDPSGATTKSAM	1435.67	4.59611	TTd	30	3.92938	0.061872	7.6122
sps	139	152	LEQDPSGATTKSAM	1435.67	4.5976	TTd-TT010	0	0	0
sps	139	152	LEQDPSGATTKSAM	1435.67	4.60365	TTd-TT010	10	3.88608	0.125756
sps	139	152	LEQDPSGATTKSAM	1435.67	4.59473	TTd-TT010	30	3.85876	0.15407	7.74484	-0.132641	0.46221
sps	140	152	EQDPSGATTKSAM	1322.59	4.25865	TTd	0	0	0
sps	140	152	EQDPSGATTKSAM	1322.59	4.27458	TTd	10	2.79455	0.211347
sps	140	152	EQDPSGATTKSAM	1322.59	4.2692	TTd	30	3.06656	0.18293	5.86111
sps	140	152	EQDPSGATTKSAM	1322.59	4.25865	TTd-TT010	0	0	0
sps	140	152	EQDPSGATTKSAM	1322.59	4.27939	TTd-TT010	10	3.07601	0.200549
sps	140	152	EQDPSGATTKSAM	1322.59	4.26789	TTd-TT010	30	3.23339	0.176906	6.30939	-0.448282	0.634041
sps	140	153	EQDPSGATTKSAML	1435.67	5.12529	TTd	0	0	0
sps	140	153	EQDPSGATTKSAML	1435.67	5.11928	TTd	10	2.97474	0.086109
sps	140	153	EQDPSGATTKSAML	1435.67	5.11057	TTd	30	3.28512	0.028867	6.25985
sps	140	153	EQDPSGATTKSAML	1435.67	5.12529	TTd-TT010	0	0	0
sps	140	153	EQDPSGATTKSAML	1435.67	5.12097	TTd-TT010	10	3.10619	0.027725
sps	140	153	EQDPSGATTKSAML	1435.67	5.11305	TTd-TT010	30	3.2049	0.029651	6.31109	-0.051231	0.258327
sps	140	156	EQDPSGATTKSAMLTNL	1763.85	6.08166	TTd	0	0	0
sps	140	156	EQDPSGATTKSAMLTNL	1763.85	6.07952	TTd	10	2.91301	0.08761
sps	140	156	EQDPSGATTKSAMLTNL	1763.85	6.07134	TTd	30	3.14871	0.080459	6.06171
sps	140	156	EQDPSGATTKSAMLTNL	1763.85	6.08166	TTd-TT010	0	0	0
sps	140	156	EQDPSGATTKSAMLTNL	1763.85	6.08009	TTd-TT010	10	2.98131	0.074134
sps	140	156	EQDPSGATTKSAMLTNL	1763.85	6.07347	TTd-TT010	30	3.18154	0.075092	6.16285	-0.10114	0.26283
sps	157	165	IIFGPGPVL	912.555	7.81032	TTd	0	0	0
sps	157	165	IIFGPGPVL	912.555	7.81265	TTd	10	0.196905	0.014618
sps	157	165	IIFGPGPVL	912.555	7.80299	TTd	30	0.254322	0.017584	0.451227
sps	157	165	IIFGPGPVL	912.555	7.81032	TTd-TT010	0	0	0
sps	157	165	IIFGPGPVL	912.555	7.80904	TTd-TT010	10	0.216423	0.01516
sps	157	165	IIFGPGPVL	912.555	7.80377	TTd-TT010	30	0.274433	0.010889	0.490856	-0.039629	0.052752
sps	157	167	IIFGPGPVLNK	1154.69	6.14037	TTd	0	0	0
sps	157	167	IIFGPGPVLNK	1154.69	6.14298	TTd	10	0.163881	0.173106
sps	157	167	IIFGPGPVLNK	1154.69	6.13533	TTd	30	0.342107	0.199131	0.505988
sps	157	167	IIFGPGPVLNK	1154.69	6.14037	TTd-TT010	0	0	0
sps	157	167	IIFGPGPVLNK	1154.69	6.14384	TTd-TT010	10	0.272063	0.189474
sps	157	167	IIFGPGPVLNK	1154.69	6.13628	TTd-TT010	30	0.337297	0.1782	0.60936	-0.103372	0.597393
sps	157	168	IIFGPGPVLNKN	1268.74	6.06219	TTd	0	0	0
sps	157	168	IIFGPGPVLNKN	1268.74	6.06484	TTd	10	0.551013	0.046338
sps	157	168	IIFGPGPVLNKN	1268.74	6.05706	TTd	30	0.720636	0.025677	1.27165
sps	157	168	IIFGPGPVLNKN	1268.74	6.06219	TTd-TT010	0	0	0
sps	157	168	IIFGPGPVLNKN	1268.74	6.06496	TTd-TT010	10	0.632751	0.064471
sps	157	168	IIFGPGPVLNKN	1268.74	6.05834	TTd-TT010	30	0.594979	0.03606	1.22773	0.043919	0.193413
sps	157	172	IIFGPGPVLNKNEVRG	1709.97	5.71362	TTd	0	0	0
sps	157	172	IIFGPGPVLNKNEVRG	1709.97	5.71254	TTd	10	2.08028	0.159979
sps	157	172	IIFGPGPVLNKNEVRG	1709.97	5.70866	TTd	30	2.32381	0.150462	4.40409
sps	157	172	IIFGPGPVLNKNEVRG	1709.97	5.71362	TTd-TT010	0	0	0
sps	157	172	IIFGPGPVLNKNEVRG	1709.97	5.71309	TTd-TT010	10	2.15136	0.147434
sps	157	172	IIFGPGPVLNKNEVRG	1709.97	5.70649	TTd-TT010	30	2.30518	0.125167	4.45654	-0.05245	0.479937
sps	157	175	IIFGPGPVLNKNEVRGIVL	2035.21	6.80723	TTd	0	0	0
sps	157	175	IIFGPGPVLNKNEVRGIVL	2035.21	6.81077	TTd	10	2.0893	0.190294
sps	157	175	IIFGPGPVLNKNEVRGIVL	2035.21	6.79777	TTd	30	2.3222	0.157214	4.41151
sps	157	175	IIFGPGPVLNKNEVRGIVL	2035.21	6.80723	TTd-TT010	0	0	0
sps	157	175	IIFGPGPVLNKNEVRGIVL	2035.21	6.80607	TTd-TT010	10	2.18313	0.160093
sps	157	175	IIFGPGPVLNKNEVRGIVL	2035.21	6.79708	TTd-TT010	30	2.34843	0.157153	4.53156	-0.120059	0.570882
sps	168	175	NEVRGIVL	899.531	5.83718	TTd	0	0	0
sps	168	175	NEVRGIVL	899.531	5.83939	TTd	10	1.23545	0.025695
sps	168	175	NEVRGIVL	899.531	5.83188	TTd	30	1.28306	0.039196	2.51851
sps	168	175	NEVRGIVL	899.531	5.83718	TTd-TT010	0	0	0
sps	168	175	NEVRGIVL	899.531	5.84159	TTd-TT010	10	1.2627	0.019395
sps	168	175	NEVRGIVL	899.531	5.83183	TTd-TT010	30	1.23928	0.025322	2.50197	0.016534	0.117588
sps	169	175	EVRGIVL	785.488	5.85189	TTd	0	0	0
sps	169	175	EVRGIVL	785.488	5.85534	TTd	10	0.638585	0.068343
sps	169	175	EVRGIVL	785.488	5.84764	TTd	30	0.681031	0.073487	1.31962
sps	169	175	EVRGIVL	785.488	5.85189	TTd-TT010	0	0	0
sps	169	175	EVRGIVL	785.488	5.85694	TTd-TT010	10	0.677299	0.07032
sps	169	175	EVRGIVL	785.488	5.84778	TTd-TT010	30	0.644902	0.069099	1.3222	-0.002585	0.220461
sps	179	194	NKNYFPCRDGFGSIMQ	1876.85	6.34895	TTd	0	0	0
sps	179	194	NKNYFPCRDGFGSIMQ	1876.85	6.34404	TTd	10	1.08984	0.182473
sps	179	194	NKNYFPCRDGFGSIMQ	1876.85	6.33533	TTd	30	1.37397	0.071126	2.46381
sps	179	194	NKNYFPCRDGFGSIMQ	1876.85	6.34895	TTd-TT010	0	0	0
sps	179	194	NKNYFPCRDGFGSIMQ	1876.85	6.3464	TTd-TT010	10	1.17849	0.067531
sps	179	194	NKNYFPCRDGFGSIMQ	1876.85	6.33854	TTd-TT010	30	1.26501	0.081483	2.4435	0.020317	0.547419
sps	179	195	NKNYFPCRDGFGSIMQM	2007.89	6.88023	TTd	0	0	0
sps	179	195	NKNYFPCRDGFGSIMQM	2007.89	6.887	TTd	10	1.03882	0.163532
sps	179	195	NKNYFPCRDGFGSIMQM	2007.89	6.87389	TTd	30	1.25253	0.110445	2.29134
sps	179	195	NKNYFPCRDGFGSIMQM	2007.89	6.88023	TTd-TT010	0	0	0
sps	179	195	NKNYFPCRDGFGSIMQM	2007.89	6.88233	TTd-TT010	10	1.16669	0.126287
sps	179	195	NKNYFPCRDGFGSIMQM	2007.89	6.87358	TTd-TT010	30	1.24293	0.113989	2.40962	-0.118278	0.490596
sps	182	189	YFPCRDGF	1004.43	6.26089	TTd	0	0	0
sps	182	189	YFPCRDGF	1004.43	6.26035	TTd	10	0.280966	0.101696
sps	182	189	YFPCRDGF	1004.43	6.25481	TTd	30	0.439647	0.075312	0.720613
sps	182	189	YFPCRDGF	1004.43	6.26089	TTd-TT010	0	0	0
sps	182	189	YFPCRDGF	1004.43	6.26258	TTd-TT010	10	0.295891	0.034382
sps	182	189	YFPCRDGF	1004.43	6.25558	TTd-TT010	30	0.387734	0.053779	0.683625	0.036988	0.305088
sps	182	194	YFPCRDGFGSIMQ	1520.67	6.81777	TTd	0	0	0
sps	182	194	YFPCRDGFGSIMQ	1520.67	6.81922	TTd	10	0.432058	0.044531
sps	182	194	YFPCRDGFGSIMQ	1520.67	6.80957	TTd	30	0.514557	0.042347	0.946615
sps	182	194	YFPCRDGFGSIMQ	1520.67	6.81777	TTd-TT010	0	0	0
sps	182	194	YFPCRDGFGSIMQ	1520.67	6.81723	TTd-TT010	10	0.377879	0.050131
sps	182	194	YFPCRDGFGSIMQ	1520.67	6.81019	TTd-TT010	30	0.486436	0.04185	0.864315	0.0823	0.150393
sps	182	195	YFPCRDGFGSIMQM	1651.71	7.43213	TTd	0	0	0
sps	182	195	YFPCRDGFGSIMQM	1651.71	7.43464	TTd	10	0.519851	0.065574
sps	182	195	YFPCRDGFGSIMQM	1651.71	7.42317	TTd	30	0.542251	0.036736	1.0621
sps	182	195	YFPCRDGFGSIMQM	1651.71	7.43213	TTd-TT010	0	0	0
sps	182	195	YFPCRDGFGSIMQM	1651.71	7.43119	TTd-TT010	10	0.524864	0.032686
sps	182	195	YFPCRDGFGSIMQM	1651.71	7.42315	TTd-TT010	30	0.567346	0.028245	1.09221	-0.030108	0.196722
sps	187	194	DGFGSIMQ	854.371	7.11009	TTd	0	0	0
sps	187	194	DGFGSIMQ	854.371	7.10907	TTd	10	0.127697	0.039126
sps	187	194	DGFGSIMQ	854.371	7.1055	TTd	30	0.142463	0.021161	0.27016
sps	187	194	DGFGSIMQ	854.371	7.11009	TTd-TT010	0	0	0
sps	187	194	DGFGSIMQ	854.371	7.11252	TTd-TT010	10	0.108423	0.008029
sps	187	194	DGFGSIMQ	854.371	7.1062	TTd-TT010	30	0.071068	0.009961	0.179491	0.090669	0.117378
sps	196	205	AFCPEYVPTF	1173.53	7.86824	TTd	0	0	0
sps	196	205	AFCPEYVPTF	1173.53	7.86977	TTd	10	0.110671	0.051602
sps	196	205	AFCPEYVPTF	1173.53	7.85985	TTd	30	0.116891	0.05801	0.227562
sps	196	205	AFCPEYVPTF	1173.53	7.86824	TTd-TT010	0	0	0
sps	196	205	AFCPEYVPTF	1173.53	7.86741	TTd-TT010	10	0.062775	0.052391
sps	196	205	AFCPEYVPTF	1173.53	7.86223	TTd-TT010	30	0.120903	0.074752	0.183678	0.043884	0.224256
sps	196	206	AFCPEYVPTFD	1288.56	7.63534	TTd	0	0	0
sps	196	206	AFCPEYVPTFD	1288.56	7.63636	TTd	10	0.30931	0.142053
sps	196	206	AFCPEYVPTFD	1288.56	7.62983	TTd	30	0.336498	0.150503	0.645808
sps	196	206	AFCPEYVPTFD	1288.56	7.63534	TTd-TT010	0	0	0
sps	196	206	AFCPEYVPTFD	1288.56	7.63597	TTd-TT010	10	0.25298	0.133695
sps	196	206	AFCPEYVPTFD	1288.56	7.63018	TTd-TT010	30	0.2968	0.115502	0.54978	0.096028	0.451509
sps	196	208	AFCPEYVPTFDNV	1501.67	7.80722	TTd	0	0	0
sps	196	208	AFCPEYVPTFDNV	1501.67	7.80618	TTd	10	1.17197	0.096819
sps	196	208	AFCPEYVPTFDNV	1501.67	7.79829	TTd	30	1.29825	0.029002	2.47023
sps	196	208	AFCPEYVPTFDNV	1501.67	7.80722	TTd-TT010	0	0	0
sps	196	208	AFCPEYVPTFDNV	1501.67	7.80287	TTd-TT010	10	1.17304	0.019755
sps	196	208	AFCPEYVPTFDNV	1501.67	7.80058	TTd-TT010	30	1.16601	0.031145	2.33906	0.131173	0.290457
sps	196	210	AFCPEYVPTFDNVIE	1743.79	8.00694	TTd	0	0	0
sps	196	210	AFCPEYVPTFDNVIE	1743.79	8.00043	TTd	10	2.13695	0.171212
sps	196	210	AFCPEYVPTFDNVIE	1743.79	7.99078	TTd	30	2.27574	0.034221	4.41269
sps	196	210	AFCPEYVPTFDNVIE	1743.79	8.00694	TTd-TT010	0	0	0
sps	196	210	AFCPEYVPTFDNVIE	1743.79	7.99556	TTd-TT010	10	2.25009	0.021538
sps	196	210	AFCPEYVPTFDNVIE	1743.79	7.99201	TTd-TT010	30	2.33279	0.069488	4.58289	-0.170196	0.513636
sps	201	207	YVPTFDN	855.388	6.10798	TTd	0	0	0
sps	201	207	YVPTFDN	855.388	6.1055	TTd	10	0.463783	0.024376
sps	201	207	YVPTFDN	855.388	6.10271	TTd	30	0.466746	0.017713	0.930529
sps	201	207	YVPTFDN	855.388	6.10798	TTd-TT010	0	0	0
sps	201	207	YVPTFDN	855.388	6.10906	TTd-TT010	10	0.472484	0.01645
sps	201	207	YVPTFDN	855.388	6.1034	TTd-TT010	30	0.503698	0.030058	0.976182	-0.045653	0.090174
sps	207	214	NVIENITS	889.462	6.20295	TTd	0	0	0
sps	207	214	NVIENITS	889.462	6.17681	TTd	10	3.73388	0.065818
sps	207	214	NVIENITS	889.462	6.17406	TTd	30	3.77474	0.03431	7.50862
sps	207	214	NVIENITS	889.462	6.20295	TTd-TT010	0	0	0
sps	207	214	NVIENITS	889.462	6.17997	TTd-TT010	10	3.72255	0.031464
sps	207	214	NVIENITS	889.462	6.17471	TTd-TT010	30	3.81738	0.042904	7.53993	-0.031304	0.197454
sps	207	215	NVIENITSL	1002.55	7.55415	TTd	0	0	0
sps	207	215	NVIENITSL	1002.55	7.52671	TTd	10	4.74001	0.238959
sps	207	215	NVIENITSL	1002.55	7.51844	TTd	30	4.75237	0.031452	9.49238
sps	207	215	NVIENITSL	1002.55	7.55415	TTd-TT010	0	0	0
sps	207	215	NVIENITSL	1002.55	7.52274	TTd-TT010	10	4.85147	0.139854
sps	207	215	NVIENITSL	1002.55	7.51675	TTd-TT010	30	4.72114	0.04565	9.57261	-0.080228	0.716877
sps	208	214	VIENITS	775.42	5.29833	TTd	0	0	0
sps	208	214	VIENITS	775.42	5.29226	TTd	10	2.80088	0.017161
sps	208	214	VIENITS	775.42	5.28823	TTd	30	2.79723	0.013925	5.59811
sps	208	214	VIENITS	775.42	5.29833	TTd-TT010	0	0	0
sps	208	214	VIENITS	775.42	5.29509	TTd-TT010	10	2.81368	0.021937
sps	208	214	VIENITS	775.42	5.29015	TTd-TT010	30	2.7852	0.018917	5.59888	-0.000776	0.065811
sps	208	215	VIENITSL	888.504	6.82127	TTd	0	0	0
sps	208	215	VIENITSL	888.504	6.8139	TTd	10	3.56285	0.083081
sps	208	215	VIENITSL	888.504	6.80756	TTd	30	3.45275	0.081993	7.0156
sps	208	215	VIENITSL	888.504	6.82127	TTd-TT010	0	0	0
sps	208	215	VIENITSL	888.504	6.81458	TTd-TT010	10	3.37936	0.056028
sps	208	215	VIENITSL	888.504	6.80803	TTd-TT010	30	3.3836	0.029546	6.76295	0.25265	0.249243
sps	216	229	TIGKSKYFQDPALL	1580.87	6.08265	TTd	0	0	0
sps	216	229	TIGKSKYFQDPALL	1580.87	6.08126	TTd	10	2.0965	0.096235
sps	216	229	TIGKSKYFQDPALL	1580.87	6.07503	TTd	30	2.07215	0.093207	4.16865
sps	216	229	TIGKSKYFQDPALL	1580.87	6.08265	TTd-TT010	0	0	0
sps	216	229	TIGKSKYFQDPALL	1580.87	6.08353	TTd-TT010	10	1.99492	0.100746
sps	216	229	TIGKSKYFQDPALL	1580.87	6.07688	TTd-TT010	30	1.98058	0.159888	3.9755	0.193149	0.479664
sps	222	228	YFQDPAL	853.409	6.87951	TTd	0	0	0
sps	222	228	YFQDPAL	853.409	6.87867	TTd	10	0.090789	0.087273
sps	222	228	YFQDPAL	853.409	6.87211	TTd	30	0.117001	0.067375	0.20779
sps	222	228	YFQDPAL	853.409	6.87951	TTd-TT010	0	0	0
sps	222	228	YFQDPAL	853.409	6.8782	TTd-TT010	10	0.074962	0.082576
sps	222	228	YFQDPAL	853.409	6.87205	TTd-TT010	30	0.063646	0.086181	0.138608	0.069182	0.261819
sps	223	229	FQDPALL	803.43	7.14213	TTd	0	0	0
sps	223	229	FQDPALL	803.43	7.14347	TTd	10	0.081058	0.029307
sps	223	229	FQDPALL	803.43	7.13673	TTd	30	0.049477	0.030795	0.130535
sps	223	229	FQDPALL	803.43	7.14213	TTd-TT010	0	0	0
sps	223	229	FQDPALL	803.43	7.14479	TTd-TT010	10	0.039757	0.020554
sps	223	229	FQDPALL	803.43	7.1381	TTd-TT010	30	0.087693	0.010335	0.12745	0.003085	0.092385
sps	230	236	LMHELIH	892.471	4.75712	TTd	0	0	0
sps	230	236	LMHELIH	892.471	4.7619	TTd	10	0.05479	0.019128
sps	230	236	LMHELIH	892.471	4.75594	TTd	30	0.04993	0.019294	0.10472
sps	230	236	LMHELIH	892.471	4.75712	TTd-TT010	0	0	0
sps	230	236	LMHELIH	892.471	4.76804	TTd-TT010	10	0.083025	0.035478
sps	230	236	LMHELIH	892.471	4.75797	TTd-TT010	30	0.121429	0.033652	0.204454	-0.099734	0.106434
sps	237	245	VLHGLYGMQ	1017.52	5.91773	TTd	0	0	0
sps	237	245	VLHGLYGMQ	1017.52	5.9169	TTd	10	0.148393	0.011966
sps	237	245	VLHGLYGMQ	1017.52	5.91246	TTd	30	0.169245	0.041144	0.317638
sps	237	245	VLHGLYGMQ	1017.52	5.91773	TTd-TT010	0	0	0
sps	237	245	VLHGLYGMQ	1017.52	5.92122	TTd-TT010	10	0.193422	0.012753
sps	237	245	VLHGLYGMQ	1017.52	5.91449	TTd-TT010	30	0.172484	0.023656	0.365906	-0.048268	0.123432
sps	249	257	HEIIPSKQE	1080.57	3.96739	TTd	0	0	0
sps	249	257	HEIIPSKQE	1080.57	3.92547	TTd	10	0.905349	0.078896
sps	249	257	HEIIPSKQE	1080.57	3.92326	TTd	30	1.34955	0.066209	2.25489
sps	249	257	HEIIPSKQE	1080.57	3.96739	TTd-TT010	0	0	0
sps	249	257	HEIIPSKQE	1080.57	3.94221	TTd-TT010	10	1.33066	0.027506
sps	249	257	HEIIPSKQE	1080.57	3.92248	TTd-TT010	30	1.20735	0.06647	2.53802	-0.28312	0.236688
sps	271	281	LFTFGGQDANL	1182.58	7.52892	TTd	0	0	0
sps	271	281	LFTFGGQDANL	1182.58	7.52849	TTd	10	1.8378	0.130508
sps	271	281	LFTFGGQDANL	1182.58	7.52061	TTd	30	2.01273	0.01094	3.85053
sps	271	281	LFTFGGQDANL	1182.58	7.52892	TTd-TT010	0	0	0
sps	271	281	LFTFGGQDANL	1182.58	7.52589	TTd-TT010	10	1.77382	0.038559
sps	271	281	LFTFGGQDANL	1182.58	7.51947	TTd-TT010	30	1.89964	0.046995	3.67346	0.177077	0.391524
sps	272	281	FTFGGQDANL	1069.49	7.0002	TTd	0	0	0
sps	272	281	FTFGGQDANL	1069.49	7.00083	TTd	10	1.53243	0.133981
sps	272	281	FTFGGQDANL	1069.49	6.99532	TTd	30	1.68889	0.101923	3.22131
sps	272	281	FTFGGQDANL	1069.49	7.0002	TTd-TT010	0	0	0
sps	272	281	FTFGGQDANL	1069.49	7.00206	TTd-TT010	10	1.55022	0.109968
sps	272	281	FTFGGQDANL	1069.49	6.99541	TTd-TT010	30	1.68788	0.081577	3.2381	-0.016789	0.401943
sps	275	281	GGQDANL	674.31	4.77982	TTd	0	0	0
sps	275	281	GGQDANL	674.31	4.77909	TTd	10	1.00438	0.099717
sps	275	281	GGQDANL	674.31	4.77425	TTd	30	1.2143	0.029451	2.21868
sps	275	281	GGQDANL	674.31	4.77982	TTd-TT010	0	0	0
sps	275	281	GGQDANL	674.31	4.78404	TTd-TT010	10	1.12356	0.044835
sps	275	281	GGQDANL	674.31	4.77443	TTd-TT010	30	1.27568	0.020187	2.39924	-0.180559	0.299151
sps	282	289	ISIDIKND	917.494	5.40285	TTd	0	0	0
sps	282	289	ISIDIKND	917.494	5.40423	TTd	10	1.16291	0.177599
sps	282	289	ISIDIKND	917.494	5.3957	TTd	30	1.27062	0.120935	2.43353
sps	282	289	ISIDIKND	917.494	5.40285	TTd-TT010	0	0	0
sps	282	289	ISIDIKND	917.494	5.40674	TTd-TT010	10	1.19537	0.113309
sps	282	289	ISIDIKND	917.494	5.39702	TTd-TT010	30	1.24531	0.146938	2.44068	-0.007149	0.532797
sps	283	289	SIDIKND	804.41	5.40303	TTd	0	0	0
sps	283	289	SIDIKND	804.41	5.40466	TTd	10	0.898014	0.118763
sps	283	289	SIDIKND	804.41	5.3968	TTd	30	0.809993	0.055095	1.70801
sps	283	289	SIDIKND	804.41	5.40303	TTd-TT010	0	0	0
sps	283	289	SIDIKND	804.41	5.40667	TTd-TT010	10	0.924496	0.11134
sps	283	289	SIDIKND	804.41	5.39723	TTd-TT010	30	0.846686	0.028345	1.77118	-0.063175	0.356289
sps	284	290	IDIKNDL	830.462	5.68446	TTd	0	0	0
sps	284	290	IDIKNDL	830.462	5.68413	TTd	10	0.228311	0.144398
sps	284	290	IDIKNDL	830.462	5.68121	TTd	30	0.292299	0.154112	0.52061
sps	284	290	IDIKNDL	830.462	5.68446	TTd-TT010	0	0	0
sps	284	290	IDIKNDL	830.462	5.68603	TTd-TT010	10	0.268003	0.130046
sps	284	290	IDIKNDL	830.462	5.67863	TTd-TT010	30	0.296418	0.128471	0.564421	-0.043811	0.462336
sps	290	297	LYEKTLND	995.504	4.66799	TTd	0	0	0
sps	290	297	LYEKTLND	995.504	4.67436	TTd	10	0.281275	0.00871
sps	290	297	LYEKTLND	995.504	4.67009	TTd	30	0.286135	0.027625	0.56741
sps	290	297	LYEKTLND	995.504	4.66799	TTd-TT010	0	0	0
sps	290	297	LYEKTLND	995.504	4.67941	TTd-TT010	10	0.196199	0.065661
sps	290	297	LYEKTLND	995.504	4.67133	TTd-TT010	30	0.124456	0.021235	0.320655	0.246755	0.196983
sps	290	304	LYEKTLNDYKAIANK	1783.96	5.74205	TTd	0	0	0
sps	290	304	LYEKTLNDYKAIANK	1783.96	5.74172	TTd	10	0.313189	0.094233
sps	290	304	LYEKTLNDYKAIANK	1783.96	5.7371	TTd	30	0.329474	0.069612	0.642663
sps	290	304	LYEKTLNDYKAIANK	1783.96	5.74205	TTd-TT010	0	0	0
sps	290	304	LYEKTLNDYKAIANK	1783.96	5.74269	TTd-TT010	10	0.32142	0.074244
sps	290	304	LYEKTLNDYKAIANK	1783.96	5.73614	TTd-TT010	30	0.372348	0.138255	0.693768	-0.051105	0.414765
sps	291	297	YEKTLND	882.42	4.13028	TTd	0	0	0
sps	291	297	YEKTLND	882.42	4.10636	TTd	10	0.235334	0.151279
sps	291	297	YEKTLND	882.42	4.11334	TTd	30	0.281275	0.168419	0.516609
sps	291	297	YEKTLND	882.42	4.13028	TTd-TT010	0	0	0
sps	291	297	YEKTLND	882.42	4.12478	TTd-TT010	10	0.272781	0.173126
sps	291	297	YEKTLND	882.42	4.11179	TTd-TT010	30	0.25175	0.17236	0.524531	-0.007922	0.519378
sps	291	320	YEKTLNDYKAIANKLSQVTSCNDPNIDIDS	3372.63	6.82092	TTd	0	0	0
sps	291	320	YEKTLNDYKAIANKLSQVTSCNDPNIDIDS	3372.63	6.81959	TTd	10	4.56823	0.332405
sps	291	320	YEKTLNDYKAIANKLSQVTSCNDPNIDIDS	3372.63	6.80852	TTd	30	5.33404	0.145911	9.90227
sps	291	320	YEKTLNDYKAIANKLSQVTSCNDPNIDIDS	3372.63	6.82092	TTd-TT010	0	0	0
sps	291	320	YEKTLNDYKAIANKLSQVTSCNDPNIDIDS	3372.63	6.8167	TTd-TT010	10	4.96398	0.114129
sps	291	320	YEKTLNDYKAIANKLSQVTSCNDPNIDIDS	3372.63	6.80863	TTd-TT010	30	5.379	0.122816	10.343	-0.440706	0.997215
sps	298	320	YKAIANKLSQVTSCNDPNIDIDS	2509.22	5.94622	TTd	0	0	0
sps	298	320	YKAIANKLSQVTSCNDPNIDIDS	2509.22	5.94093	TTd	10	4.22056	0.386917
sps	298	320	YKAIANKLSQVTSCNDPNIDIDS	2509.22	5.93477	TTd	30	4.83108	0.20296	9.05164
sps	298	320	YKAIANKLSQVTSCNDPNIDIDS	2509.22	5.94622	TTd-TT010	0	0	0
sps	298	320	YKAIANKLSQVTSCNDPNIDIDS	2509.22	5.94235	TTd-TT010	10	4.4759	0.183064
sps	298	320	YKAIANKLSQVTSCNDPNIDIDS	2509.22	5.93532	TTd-TT010	30	4.90883	0.181975	9.38473	-0.333092	1.16075
sps	301	320	IANKLSQVTSCNDPNIDIDS	2147.03	6.01419	TTd	0	0	0
sps	301	320	IANKLSQVTSCNDPNIDIDS	2147.03	6.0047	TTd	10	4.44047	0.338334
sps	301	320	IANKLSQVTSCNDPNIDIDS	2147.03	6.00084	TTd	30	5.04093	0.091218	9.4814
sps	301	320	IANKLSQVTSCNDPNIDIDS	2147.03	6.01419	TTd-TT010	0	0	0
sps	301	320	IANKLSQVTSCNDPNIDIDS	2147.03	6.008	TTd-TT010	10	4.51433	0.048243
sps	301	320	IANKLSQVTSCNDPNIDIDS	2147.03	6.00289	TTd-TT010	30	5.03617	0.108503	9.5505	-0.069097	1.015
sps	304	317	KLSQVTSCNDPNID	1533.72	5.14054	TTd	0	0	0
sps	304	317	KLSQVTSCNDPNID	1533.72	5.1329	TTd	10	2.94693	0.260415
sps	304	317	KLSQVTSCNDPNID	1533.72	5.12763	TTd	30	3.46471	0.092604	6.41164
sps	304	317	KLSQVTSCNDPNID	1533.72	5.14054	TTd-TT010	0	0	0
sps	304	317	KLSQVTSCNDPNID	1533.72	5.13554	TTd-TT010	10	3.3286	0.048102
sps	304	317	KLSQVTSCNDPNID	1533.72	5.13027	TTd-TT010	30	3.57715	0.045603	6.90575	-0.494109	0.781245
sps	304	320	KLSQVTSCNDPNIDIDS	1848.86	5.69155	TTd	0	0	0
sps	304	320	KLSQVTSCNDPNIDIDS	1848.86	5.68655	TTd	10	3.7549	0.313722
sps	304	320	KLSQVTSCNDPNIDIDS	1848.86	5.68619	TTd	30	4.24455	0.087665	7.99945
sps	304	320	KLSQVTSCNDPNIDIDS	1848.86	5.69155	TTd-TT010	0	0	0
sps	304	320	KLSQVTSCNDPNIDIDS	1848.86	5.68964	TTd-TT010	10	3.90376	0.132109
sps	304	320	KLSQVTSCNDPNIDIDS	1848.86	5.6836	TTd-TT010	30	4.28239	0.097006	8.18615	-0.186701	0.941166
sps	306	320	SQVTSCNDPNIDIDS	1607.69	6.01598	TTd	0	0	0
sps	306	320	SQVTSCNDPNIDIDS	1607.69	6.00777	TTd	10	3.41936	0.14565
sps	306	320	SQVTSCNDPNIDIDS	1607.69	6.00535	TTd	30	3.74602	0.101588	7.16538
sps	306	320	SQVTSCNDPNIDIDS	1607.69	6.01598	TTd-TT010	0	0	0
sps	306	320	SQVTSCNDPNIDIDS	1607.69	6.00879	TTd-TT010	10	3.40429	0.05579
sps	306	320	SQVTSCNDPNIDIDS	1607.69	6.00959	TTd-TT010	30	3.53443	0.069395	6.93872	0.226652	0.43695
sps	321	331	YKQIYQQKYQF	1536.78	5.55417	TTd	0	0	0
sps	321	331	YKQIYQQKYQF	1536.78	5.5528	TTd	10	0.399909	0.080797
sps	321	331	YKQIYQQKYQF	1536.78	5.55247	TTd	30	0.50908	0.044423	0.908989
sps	321	331	YKQIYQQKYQF	1536.78	5.55461	TTd-TT010	0	0	0
sps	321	331	YKQIYQQKYQF	1536.78	5.55788	TTd-TT010	10	0.476723	0.045274
sps	321	331	YKQIYQQKYQF	1536.78	5.54938	TTd-TT010	30	0.547513	0.052356	1.02424	-0.115247	0.242391
sps	321	339	YKQIYQQKYQFDKDSNGQY	2444.15	5.26292	TTd	0	0	0
sps	321	339	YKQIYQQKYQFDKDSNGQY	2444.15	5.25954	TTd	10	1.70995	0.188359
sps	321	339	YKQIYQQKYQFDKDSNGQY	2444.15	5.2546	TTd	30	2.10762	0.154657	3.81758
sps	321	339	YKQIYQQKYQFDKDSNGQY	2444.15	5.26292	TTd-TT010	0	0	0
sps	321	339	YKQIYQQKYQFDKDSNGQY	2444.15	5.2642	TTd-TT010	10	1.76819	0.058961
sps	321	339	YKQIYQQKYQFDKDSNGQY	2444.15	5.2564	TTd-TT010	30	2.16234	0.106543	3.93053	-0.112957	0.565077
sps	321	343	YKQIYQQKYQFDKDSNGQYIVNE	2899.39	5.60723	TTd	0	0	0
sps	321	343	YKQIYQQKYQFDKDSNGQYIVNE	2899.39	5.607	TTd	10	3.06426	0.443506
sps	321	343	YKQIYQQKYQFDKDSNGQYIVNE	2899.39	5.60489	TTd	30	3.81845	0.110266	6.88271
sps	321	343	YKQIYQQKYQFDKDSNGQYIVNE	2899.39	5.60723	TTd-TT010	0	0	0
sps	321	343	YKQIYQQKYQFDKDSNGQYIVNE	2899.39	5.60864	TTd-TT010	10	3.43987	0.138679
sps	321	343	YKQIYQQKYQFDKDSNGQYIVNE	2899.39	5.60271	TTd-TT010	30	3.86077	0.362551	7.30064	-0.417926	1.33052
sps	321	346	YKQIYQQKYQFDKDSNGQYIVNEDKF	3289.58	5.80677	TTd	0	0	0
sps	321	346	YKQIYQQKYQFDKDSNGQYIVNEDKF	3289.58	5.80768	TTd	10	3.07316	0.413453
sps	321	346	YKQIYQQKYQFDKDSNGQYIVNEDKF	3289.58	5.80109	TTd	30	3.8669	0.084081	6.94006
sps	321	346	YKQIYQQKYQFDKDSNGQYIVNEDKF	3289.58	5.80677	TTd-TT010	0	0	0
sps	321	346	YKQIYQQKYQFDKDSNGQYIVNEDKF	3289.58	5.80748	TTd-TT010	10	3.41446	0.097326
sps	321	346	YKQIYQQKYQFDKDSNGQYIVNEDKF	3289.58	5.79975	TTd-TT010	30	3.94391	0.214261	7.35837	-0.418306	1.24036
sps	324	331	IYQQKYQF	1117.57	5.698	TTd	0	0	0
sps	324	331	IYQQKYQF	1117.57	5.69668	TTd	10	0.262737	0.040043
sps	324	331	IYQQKYQF	1117.57	5.69406	TTd	30	0.268754	0.015574	0.531491
sps	324	331	IYQQKYQF	1117.57	5.698	TTd-TT010	0	0	0
sps	324	331	IYQQKYQF	1117.57	5.69898	TTd-TT010	10	0.223792	0.026915
sps	324	331	IYQQKYQF	1117.57	5.69194	TTd-TT010	30	0.188282	0.024183	0.412074	0.119417	0.120129
sps	332	343	DKDSNGQYIVNE	1381.62	5.18825	TTd	0	0	0
sps	332	343	DKDSNGQYIVNE	1381.62	5.18761	TTd	10	2.36176	0.363059
sps	332	343	DKDSNGQYIVNE	1381.62	5.17852	TTd	30	2.79545	0.058457	5.15721
sps	332	343	DKDSNGQYIVNE	1381.62	5.18825	TTd-TT010	0	0	0
sps	332	343	DKDSNGQYIVNE	1381.62	5.18923	TTd-TT010	10	2.49218	0.103895
sps	332	343	DKDSNGQYIVNE	1381.62	5.18076	TTd-TT010	30	2.90337	0.229313	5.39555	-0.23834	1.08918
sps	332	346	DKDSNGQYIVNEDKF	1771.81	5.72053	TTd	0	0	0
sps	332	346	DKDSNGQYIVNEDKF	1771.81	5.7188	TTd	10	2.48753	0.233169
sps	332	346	DKDSNGQYIVNEDKF	1771.81	5.7134	TTd	30	3.01509	0.112669	5.50262
sps	332	346	DKDSNGQYIVNEDKF	1771.81	5.71955	TTd-TT010	0	0	0
sps	332	346	DKDSNGQYIVNEDKF	1771.81	5.71807	TTd-TT010	10	2.73488	0.124201
sps	332	346	DKDSNGQYIVNEDKF	1771.81	5.70986	TTd-TT010	30	3.09936	0.089922	5.83424	-0.331619	0.699507
sps	332	349	DKDSNGQYIVNEDKFQIL	2126.04	6.72689	TTd	0	0	0
sps	332	349	DKDSNGQYIVNEDKFQIL	2126.04	6.72789	TTd	10	2.21599	0.357842
sps	332	349	DKDSNGQYIVNEDKFQIL	2126.04	6.71756	TTd	30	2.93116	0.088972	5.14714
sps	332	349	DKDSNGQYIVNEDKFQIL	2126.04	6.72689	TTd-TT010	0	0	0
sps	332	349	DKDSNGQYIVNEDKFQIL	2126.04	6.72456	TTd-TT010	10	2.53883	0.071842
sps	332	349	DKDSNGQYIVNEDKFQIL	2126.04	6.71807	TTd-TT010	30	2.96997	0.140939	5.5088	-0.361657	1.07353
sps	339	346	YIVNEDKF	1027.51	5.79907	TTd	0	0	0
sps	339	346	YIVNEDKF	1027.51	5.79809	TTd	10	1.18643	0.196159
sps	339	346	YIVNEDKF	1027.51	5.79322	TTd	30	1.42925	0.079674	2.61568
sps	339	346	YIVNEDKF	1027.51	5.79907	TTd-TT010	0	0	0
sps	339	346	YIVNEDKF	1027.51	5.80036	TTd-TT010	10	1.19829	0.092745
sps	339	346	YIVNEDKF	1027.51	5.79338	TTd-TT010	30	1.43582	0.076402	2.63411	-0.018436	0.588477
sps	340	346	IVNEDKF	864.446	5.02285	TTd	0	0	0
sps	340	346	IVNEDKF	864.446	5.01466	TTd	10	0.742638	0.177614
sps	340	346	IVNEDKF	864.446	5.01112	TTd	30	0.96269	0.13229	1.70533
sps	340	346	IVNEDKF	864.446	5.02285	TTd-TT010	0	0	0
sps	340	346	IVNEDKF	864.446	5.0231	TTd-TT010	10	0.840704	0.125162
sps	340	346	IVNEDKF	864.446	5.01218	TTd-TT010	30	1.00841	0.151329	1.84912	-0.14379	0.532842
sps	340	349	IVNEDKFQIL	1218.67	6.60435	TTd	0	0	0
sps	340	349	IVNEDKFQIL	1218.67	6.60683	TTd	10	0.736267	0.048544
sps	340	349	IVNEDKFQIL	1218.67	6.59493	TTd	30	0.891499	0.096795	1.62777
sps	340	349	IVNEDKFQIL	1218.67	6.60435	TTd-TT010	0	0	0
sps	340	349	IVNEDKFQIL	1218.67	6.60234	TTd-TT010	10	0.760553	0.052778
sps	340	349	IVNEDKFQIL	1218.67	6.59638	TTd-TT010	30	0.881912	0.042195	1.64247	-0.014699	0.290385
sps	343	349	EDKFQIL	892.477	6.46591	TTd	0	0	0
sps	343	349	EDKFQIL	892.477	6.4643	TTd	10	0.079314	0.04936
sps	343	349	EDKFQIL	892.477	6.45582	TTd	30	0.143445	0.016704	0.222759
sps	343	349	EDKFQIL	892.477	6.46591	TTd-TT010	0	0	0
sps	343	349	EDKFQIL	892.477	6.46447	TTd-TT010	10	0.11166	0.050231
sps	343	349	EDKFQIL	892.477	6.45862	TTd-TT010	30	0.15259	0.046348	0.26425	-0.041491	0.150693
sps	344	354	DKFQILYNSIM	1371.7	7.6405	TTd	0	0	0
sps	344	354	DKFQILYNSIM	1371.7	7.64844	TTd	10	0.18948	0.048922
sps	344	354	DKFQILYNSIM	1371.7	7.63766	TTd	30	0.206012	0.025645	0.395492
sps	344	354	DKFQILYNSIM	1371.7	7.6405	TTd-TT010	0	0	0
sps	344	354	DKFQILYNSIM	1371.7	7.64347	TTd-TT010	10	0.129974	0.019417
sps	344	354	DKFQILYNSIM	1371.7	7.63736	TTd-TT010	30	0.185779	0.07277	0.315753	0.079739	0.21831
sps	347	354	QILYNSIM	981.507	7.18499	TTd	0	0	0
sps	347	354	QILYNSIM	981.507	7.18667	TTd	10	0.167002	0.031553
sps	347	354	QILYNSIM	981.507	7.17923	TTd	30	0.141708	0.017628	0.30871
sps	347	354	QILYNSIM	981.507	7.18499	TTd-TT010	0	0	0
sps	347	354	QILYNSIM	981.507	7.18672	TTd-TT010	10	0.142632	0.026308
sps	347	354	QILYNSIM	981.507	7.1798	TTd-TT010	30	0.140954	0.01741	0.283586	0.025124	0.094659
sps	348	354	ILYNSIM	853.449	5.16379	TTd	0	0	0
sps	348	354	ILYNSIM	853.449	5.16087	TTd	10	1.27247	0.146918
sps	348	354	ILYNSIM	853.449	5.15339	TTd	30	1.41602	0.067744	2.6885
sps	348	354	ILYNSIM	853.449	5.16379	TTd-TT010	0	0	0
sps	348	354	ILYNSIM	853.449	5.16317	TTd-TT010	10	1.33543	0.073722
sps	348	354	ILYNSIM	853.449	5.15641	TTd-TT010	30	1.4898	0.065044	2.82523	-0.136737	0.440754
sps	350	356	YNSIMYG	847.365	6.31874	TTd	0	0	0
sps	350	356	YNSIMYG	847.365	6.31669	TTd	10	0.190067	0.040683
sps	350	356	YNSIMYG	847.365	6.31074	TTd	30	0.172381	0.00682	0.362448
sps	350	356	YNSIMYG	847.365	6.31874	TTd-TT010	0	0	0
sps	350	356	YNSIMYG	847.365	6.31634	TTd-TT010	10	0.137585	0.036434
sps	350	356	YNSIMYG	847.365	6.30976	TTd-TT010	30	0.112291	0.0377	0.249876	0.112572	0.122049
sps	351	368	NSIMYGFTEIELGKKFNI	2104.08	6.69921	TTd	0	0	0
sps	351	368	NSIMYGFTEIELGKKFNI	2104.08	6.6973	TTd	10	4.04565	0.199619
sps	351	368	NSIMYGFTEIELGKKFNI	2104.08	6.68809	TTd	30	4.46182	0.124795	8.50747
sps	351	368	NSIMYGFTEIELGKKFNI	2104.08	6.69921	TTd-TT010	0	0	0
sps	351	368	NSIMYGFTEIELGKKFNI	2104.08	6.69483	TTd-TT010	10	4.19916	0.142698
sps	351	368	NSIMYGFTEIELGKKFNI	2104.08	6.68938	TTd-TT010	30	4.4745	0.116997	8.67366	-0.166187	0.598857
sps	360	374	IELGKKFNIKTRLSY	1810.06	5.47462	TTd	0	0	0
sps	360	374	IELGKKFNIKTRLSY	1810.06	5.46977	TTd	10	3.08601	0.302414
sps	360	374	IELGKKFNIKTRLSY	1810.06	5.46515	TTd	30	3.56224	0.1915	6.64826
sps	360	374	IELGKKFNIKTRLSY	1810.06	5.47462	TTd-TT010	0	0	0
sps	360	374	IELGKKFNIKTRLSY	1810.06	5.47054	TTd-TT010	10	3.44474	0.207467
sps	360	374	IELGKKFNIKTRLSY	1810.06	5.46354	TTd-TT010	30	3.55541	0.133406	7.00015	-0.351898	0.907242
sps	363	372	GKKFNIKTRL	1204.75	4.35818	TTd	0	0	0
sps	363	372	GKKFNIKTRL	1204.75	4.33686	TTd	10	1.67661	0.325555
sps	363	372	GKKFNIKTRL	1204.75	4.40307	TTd	30	1.87602	0.291998	3.55263
sps	363	372	GKKFNIKTRL	1204.75	4.35818	TTd-TT010	0	0	0
sps	363	372	GKKFNIKTRL	1204.75	4.38279	TTd-TT010	10	1.90567	0.234285
sps	363	372	GKKFNIKTRL	1204.75	4.40356	TTd-TT010	30	2.03217	0.289026	3.93784	-0.385211	0.976665
sps	363	374	GKKFNIKTRLSY	1454.85	4.73412	TTd	0	0	0
sps	363	374	GKKFNIKTRLSY	1454.85	4.75641	TTd	10	2.80041	0.314112
sps	363	374	GKKFNIKTRLSY	1454.85	4.7555	TTd	30	3.26987	0.056471	6.07028
sps	363	374	GKKFNIKTRLSY	1454.85	4.73412	TTd-TT010	0	0	0
sps	363	374	GKKFNIKTRLSY	1454.85	4.76399	TTd-TT010	10	3.22987	0.058318
sps	363	374	GKKFNIKTRLSY	1454.85	4.75559	TTd-TT010	30	3.26995	0.077205	6.49983	-0.429547	0.942336
sps	373	387	SYFSMNHDPVKIPNL	1761.86	6.58909	TTd	0	0	0
sps	373	387	SYFSMNHDPVKIPNL	1761.86	6.59062	TTd	10	2.14784	0.151468
sps	373	387	SYFSMNHDPVKIPNL	1761.86	6.58069	TTd	30	2.08867	0.303592	4.23651
sps	373	387	SYFSMNHDPVKIPNL	1761.86	6.58909	TTd-TT010	0	0	0
sps	373	387	SYFSMNHDPVKIPNL	1761.86	6.58866	TTd-TT010	10	2.10473	0.078985
sps	373	387	SYFSMNHDPVKIPNL	1761.86	6.582	TTd-TT010	30	2.11311	0.093418	4.21784	0.018674	0.910776
sps	375	387	FSMNHDPVKIPNL	1511.77	6.24685	TTd	0	0	0
sps	375	387	FSMNHDPVKIPNL	1511.77	6.2488	TTd	10	1.40991	0.14137
sps	375	387	FSMNHDPVKIPNL	1511.77	6.24243	TTd	30	1.38438	0.14322	2.79428
sps	375	387	FSMNHDPVKIPNL	1511.77	6.24685	TTd-TT010	0	0	0
sps	375	387	FSMNHDPVKIPNL	1511.77	6.24906	TTd-TT010	10	1.40894	0.12601
sps	375	387	FSMNHDPVKIPNL	1511.77	6.2425	TTd-TT010	30	1.42301	0.128783	2.83195	-0.037667	0.42966
sps	375	390	FSMNHDPVKIPNLLDD	1854.91	6.69177	TTd	0	0	0
sps	375	390	FSMNHDPVKIPNLLDD	1854.91	6.69445	TTd	10	2.5376	0.040321
sps	375	390	FSMNHDPVKIPNLLDD	1854.91	6.686	TTd	30	2.26892	0.177338	4.80652
sps	375	390	FSMNHDPVKIPNLLDD	1854.91	6.69177	TTd-TT010	0	0	0
sps	375	390	FSMNHDPVKIPNLLDD	1854.91	6.69379	TTd-TT010	10	2.4899	0.04925
sps	375	390	FSMNHDPVKIPNLLDD	1854.91	6.68496	TTd-TT010	30	2.32173	0.205989	4.81163	-0.005106	0.617967
sps	378	387	NHDPVKIPNL	1146.63	5.56427	TTd	0	0	0
sps	378	387	NHDPVKIPNL	1146.63	5.56364	TTd	10	1.18337	0.085922
sps	378	387	NHDPVKIPNL	1146.63	5.56266	TTd	30	1.13447	0.040901	2.31784
sps	378	387	NHDPVKIPNL	1146.63	5.56427	TTd-TT010	0	0	0
sps	378	387	NHDPVKIPNL	1146.63	5.5673	TTd-TT010	10	1.17442	0.040333
sps	378	387	NHDPVKIPNL	1146.63	5.55936	TTd-TT010	30	1.15438	0.029944	2.3288	-0.010959	0.257766
sps	388	399	LDDTIYNDTEGF	1402.6	7.38223	TTd	0	0	0
sps	388	399	LDDTIYNDTEGF	1402.6	7.38163	TTd	10	0.500125	0.075955
sps	388	399	LDDTIYNDTEGF	1402.6	7.37455	TTd	30	0.549909	0.018395	1.05003
sps	388	399	LDDTIYNDTEGF	1402.6	7.38223	TTd-TT010	0	0	0
sps	388	399	LDDTIYNDTEGF	1402.6	7.38074	TTd-TT010	10	0.489496	0.044269
sps	388	399	LDDTIYNDTEGF	1402.6	7.37297	TTd-TT010	30	0.449686	0.073218	0.939182	0.110852	0.227865
sps	390	399	DTIYNDTEGF	1174.49	7.21485	TTd	0	0	0
sps	390	399	DTIYNDTEGF	1174.49	7.21536	TTd	10	0.998637	0.065588
sps	390	399	DTIYNDTEGF	1174.49	7.20897	TTd	30	1.22583	0.059756	2.22447
sps	390	399	DTIYNDTEGF	1174.49	7.21485	TTd-TT010	0	0	0
sps	390	399	DTIYNDTEGF	1174.49	7.21602	TTd-TT010	10	1.04369	0.017087
sps	390	399	DTIYNDTEGF	1174.49	7.21046	TTd-TT010	30	1.19783	0.044769	2.24152	-0.017053	0.196764
sps	392	399	IYNDTEGF	958.415	6.51853	TTd	0	0	0
sps	392	399	IYNDTEGF	958.415	6.51242	TTd	10	0.924183	0.205035
sps	392	399	IYNDTEGF	958.415	6.51011	TTd	30	1.22875	0.132069	2.15293
sps	392	399	IYNDTEGF	958.415	6.51853	TTd-TT010	0	0	0
sps	392	399	IYNDTEGF	958.415	6.51406	TTd-TT010	10	0.895356	0.228999
sps	392	399	IYNDTEGF	958.415	6.50784	TTd-TT010	30	1.12094	0.233807	2.0163	0.13663	0.701421
sps	400	415	NIESKDLKSEYKGQNM	1883.92	4.73932	TTd	0	0	0
sps	400	415	NIESKDLKSEYKGQNM	1883.92	4.74466	TTd	10	2.23676	0.258991
sps	400	415	NIESKDLKSEYKGQNM	1883.92	4.73843	TTd	30	2.84613	0.279558	5.08289
sps	400	415	NIESKDLKSEYKGQNM	1883.92	4.73932	TTd-TT010	0	0	0
sps	400	415	NIESKDLKSEYKGQNM	1883.92	4.74775	TTd-TT010	10	2.60409	0.148042
sps	400	415	NIESKDLKSEYKGQNM	1883.92	4.73873	TTd-TT010	30	3.06547	0.226759	5.66956	-0.586671	0.838674
sps	403	415	SKDLKSEYKGQNM	1527.75	4.17982	TTd	0	0	0
sps	403	415	SKDLKSEYKGQNM	1527.75	4.15176	TTd	10	1.30021	0.155363
sps	403	415	SKDLKSEYKGQNM	1527.75	4.16242	TTd	30	1.73094	0.180897	3.03116
sps	403	415	SKDLKSEYKGQNM	1527.75	4.17982	TTd-TT010	0	0	0
sps	403	415	SKDLKSEYKGQNM	1527.75	4.17696	TTd-TT010	10	1.744	0.145299
sps	403	415	SKDLKSEYKGQNM	1527.75	4.16206	TTd-TT010	30	1.86674	0.137354	3.61075	-0.579591	0.542691
sps	410	418	YKGQNMRVN	1109.55	4.7835	TTd	0	0	0
sps	410	418	YKGQNMRVN	1109.55	4.78677	TTd	10	0.221208	0.131018
sps	410	418	YKGQNMRVN	1109.55	4.77815	TTd	30	0.369082	0.07282	0.59029
sps	410	418	YKGQNMRVN	1109.55	4.7835	TTd-TT010	0	0	0
sps	410	418	YKGQNMRVN	1109.55	4.78981	TTd-TT010	10	0.228596	0.026471
sps	410	418	YKGQNMRVN	1109.55	4.77934	TTd-TT010	30	0.253736	0.005307	0.482332	0.107958	0.393054
sps	459	465	TDLGGEL	704.346	6.27539	TTd	0	0	0
sps	459	465	TDLGGEL	704.346	6.27001	TTd	10	1.73628	0.059952
sps	459	465	TDLGGEL	704.346	6.26578	TTd	30	1.67424	0.051251	3.41052
sps	459	465	TDLGGEL	704.346	6.27539	TTd-TT010	0	0	0
sps	459	465	TDLGGEL	704.346	6.2728	TTd-TT010	10	1.68173	0.040678
sps	459	465	TDLGGEL	704.346	6.26679	TTd-TT010	30	1.60103	0.031674	3.28276	0.127753	0.179856
sps	477	483	IAEKNSF	808.42	4.54558	TTd	0	0	0
sps	477	483	IAEKNSF	808.42	4.58964	TTd	10	1.28584	0.074007
sps	477	483	IAEKNSF	808.42	4.5847	TTd	30	1.52004	0.148703	2.80589
sps	477	483	IAEKNSF	808.42	4.54558	TTd-TT010	0	0	0
sps	477	483	IAEKNSF	808.42	4.59201	TTd-TT010	10	1.12287	0.152245
sps	477	483	IAEKNSF	808.42	4.58033	TTd-TT010	30	1.27961	0.034135	2.40248	0.403408	0.456735
sps	477	491	IAEKNSFSEEPFQDE	1769.79	6.03635	TTd	0	0	0
sps	477	491	IAEKNSFSEEPFQDE	1769.79	6.02838	TTd	10	2.80586	0.20874
sps	477	491	IAEKNSFSEEPFQDE	1769.79	6.02786	TTd	30	3.16144	0.061243	5.96731
sps	477	491	IAEKNSFSEEPFQDE	1769.79	6.03635	TTd-TT010	0	0	0
sps	477	491	IAEKNSFSEEPFQDE	1769.79	6.03687	TTd-TT010	10	2.85989	0.123225
sps	477	491	IAEKNSFSEEPFQDE	1769.79	6.03261	TTd-TT010	30	3.05178	0.084956	5.91167	0.055638	0.62622
sps	484	491	SEEPFQDE	980.384	5.91238	TTd	0	0	0
sps	484	491	SEEPFQDE	980.384	5.90906	TTd	10	0.86696	0.094904
sps	484	491	SEEPFQDE	980.384	5.90599	TTd	30	1.08509	0.036454	1.95205
sps	484	491	SEEPFQDE	980.384	5.91238	TTd-TT010	0	0	0
sps	484	491	SEEPFQDE	980.384	5.91283	TTd-TT010	10	0.85916	0.01462
sps	484	491	SEEPFQDE	980.384	5.90777	TTd-TT010	30	1.05317	0.08903	1.91233	0.039727	0.284712
sps	492	504	IVSYNTKNKPLNF	1537.84	5.43197	TTd	0	0	0
sps	492	504	IVSYNTKNKPLNF	1537.84	5.42706	TTd	10	4.61421	0.051059
sps	492	504	IVSYNTKNKPLNF	1537.84	5.42294	TTd	30	4.67893	0.068403	9.29313
sps	492	504	IVSYNTKNKPLNF	1537.84	5.43162	TTd-TT010	0	0	0
sps	492	504	IVSYNTKNKPLNF	1537.84	5.43189	TTd-TT010	10	4.56912	0.05722
sps	492	504	IVSYNTKNKPLNF	1537.84	5.42346	TTd-TT010	30	4.80139	0.060249	9.37051	-0.077373	0.205209
sps	496	504	NTKNKPLNF	1075.59	4.70305	TTd	0	0	0
sps	496	504	NTKNKPLNF	1075.59	4.71924	TTd	10	3.10884	0.069641
sps	496	504	NTKNKPLNF	1075.59	4.71748	TTd	30	3.1144	0.072042	6.22324
sps	496	504	NTKNKPLNF	1075.59	4.70305	TTd-TT010	0	0	0
sps	496	504	NTKNKPLNF	1075.59	4.72924	TTd-TT010	10	3.18819	0.153967
sps	496	504	NTKNKPLNF	1075.59	4.71796	TTd-TT010	30	3.12563	0.081328	6.31381	-0.090572	0.461901
sps	498	510	KNKPLNFNYSLDK	1580.84	4.79187	TTd	0	0	0
sps	498	510	KNKPLNFNYSLDK	1580.84	4.79098	TTd	10	3.68932	0.078999
sps	498	510	KNKPLNFNYSLDK	1580.84	4.78515	TTd	30	3.64188	0.108708	7.33121
sps	498	510	KNKPLNFNYSLDK	1580.84	4.79187	TTd-TT010	0	0	0
sps	498	510	KNKPLNFNYSLDK	1580.84	4.7945	TTd-TT010	10	3.69041	0.085969
sps	498	510	KNKPLNFNYSLDK	1580.84	4.78625	TTd-TT010	30	3.70495	0.084466	7.39536	-0.064148	0.326124
sps	508	516	LDKIIVDYN	1092.59	6.46441	TTd	0	0	0
sps	508	516	LDKIIVDYN	1092.59	6.46358	TTd	10	1.39349	0.157433
sps	508	516	LDKIIVDYN	1092.59	6.45398	TTd	30	1.62731	0.076394	3.02079
sps	508	516	LDKIIVDYN	1092.59	6.46441	TTd-TT010	0	0	0
sps	508	516	LDKIIVDYN	1092.59	6.46371	TTd-TT010	10	1.53757	0.095704
sps	508	516	LDKIIVDYN	1092.59	6.45547	TTd-TT010	30	1.77514	0.081155	3.31271	-0.291918	0.472299
sps	523	529	LPNDRTT	816.421	5.53827	TTd	0	0	0
sps	523	529	LPNDRTT	816.421	5.53833	TTd	10	0.048646	0.072801
sps	523	529	LPNDRTT	816.421	5.53496	TTd	30	0.084987	0.074298	0.133633
sps	523	529	LPNDRTT	816.421	5.53827	TTd-TT010	0	0	0
sps	523	529	LPNDRTT	816.421	5.54198	TTd-TT010	10	0.075249	0.066818
sps	523	529	LPNDRTT	816.421	5.53324	TTd-TT010	30	0.123746	0.10252	0.198995	-0.065362	0.30756
sps	549	556	IEIHNIDD	968.468	5.19708	TTd	0	0	0
sps	549	556	IEIHNIDD	968.468	5.19463	TTd	10	1.20719	0.13855
sps	549	556	IEIHNIDD	968.468	5.1872	TTd	30	1.34019	0.106707	2.54738
sps	549	556	IEIHNIDD	968.468	5.19708	TTd-TT010	0	0	0
sps	549	556	IEIHNIDD	968.468	5.19806	TTd-TT010	10	1.17266	0.102709
sps	549	556	IEIHNIDD	968.468	5.19142	TTd-TT010	30	1.25575	0.092641	2.42841	0.118969	0.41565
sps	549	557	IEIHNIDDN	1082.51	5.10207	TTd	0	0	0
sps	549	557	IEIHNIDDN	1082.51	5.10101	TTd	10	1.51073	0.090919
sps	549	557	IEIHNIDDN	1082.51	5.09193	TTd	30	1.66619	0.038779	3.17691
sps	549	557	IEIHNIDDN	1082.51	5.10207	TTd-TT010	0	0	0
sps	549	557	IEIHNIDDN	1082.51	5.10058	TTd-TT010	10	1.52676	0.033523
sps	549	557	IEIHNIDDN	1082.51	5.09335	TTd-TT010	30	1.75134	0.092499	3.27809	-0.101181	0.277497
sps	549	560	IEIHNIDDNTIY	1459.71	6.28827	TTd	0	0	0
sps	549	560	IEIHNIDDNTIY	1459.71	6.28311	TTd	10	2.48528	0.213668
sps	549	560	IEIHNIDDNTIY	1459.71	6.27694	TTd	30	2.72177	0.007041	5.20705
sps	549	560	IEIHNIDDNTIY	1459.71	6.28827	TTd-TT010	0	0	0
sps	549	560	IEIHNIDDNTIY	1459.71	6.28453	TTd-TT010	10	2.4793	0.03346
sps	549	560	IEIHNIDDNTIY	1459.71	6.27918	TTd-TT010	30	2.77672	0.046311	5.25602	-0.048971	0.641004
sps	549	561	IEIHNIDDNTIYQ	1587.76	6.02105	TTd	0	0	0
sps	549	561	IEIHNIDDNTIYQ	1587.76	6.01463	TTd	10	2.54939	0.19387
sps	549	561	IEIHNIDDNTIYQ	1587.76	6.01086	TTd	30	3.00758	0.047739	5.55697
sps	549	561	IEIHNIDDNTIYQ	1587.76	6.02105	TTd-TT010	0	0	0
sps	549	561	IEIHNIDDNTIYQ	1587.76	6.01828	TTd-TT010	10	2.64879	0.028694
sps	549	561	IEIHNIDDNTIYQ	1587.76	6.01301	TTd-TT010	30	2.97073	0.052427	5.61952	-0.062553	0.58161
sps	549	562	IEIHNIDDNTIYQY	1750.83	6.5581	TTd	0	0	0
sps	549	562	IEIHNIDDNTIYQY	1750.83	6.55192	TTd	10	2.85594	0.19439
sps	549	562	IEIHNIDDNTIYQY	1750.83	6.54585	TTd	30	3.10704	0.053085	5.96298
sps	549	562	IEIHNIDDNTIYQY	1750.83	6.5581	TTd-TT010	0	0	0
sps	549	562	IEIHNIDDNTIYQY	1750.83	6.55361	TTd-TT010	10	2.91751	0.066525
sps	549	562	IEIHNIDDNTIYQY	1750.83	6.547	TTd-TT010	30	3.19968	0.103713	6.11719	-0.154206	0.58317
sps	549	563	IEIHNIDDNTIYQYL	1863.91	7.50777	TTd	0	0	0
sps	549	563	IEIHNIDDNTIYQYL	1863.91	7.50301	TTd	10	2.62718	0.213065
sps	549	563	IEIHNIDDNTIYQYL	1863.91	7.49404	TTd	30	2.98986	0.062913	5.61704
sps	549	563	IEIHNIDDNTIYQYL	1863.91	7.50777	TTd-TT010	0	0	0
sps	549	563	IEIHNIDDNTIYQYL	1863.91	7.50073	TTd-TT010	10	2.69728	0.060871
sps	549	563	IEIHNIDDNTIYQYL	1863.91	7.49357	TTd-TT010	30	3.06189	0.105164	5.75917	-0.142127	0.639195
sps	550	556	EIHNIDD	855.384	5.21863	TTd	0	0	0
sps	550	556	EIHNIDD	855.384	5.21546	TTd	10	1.15811	0.183265
sps	550	556	EIHNIDD	855.384	5.20771	TTd	30	1.33861	0.029337	2.49672
sps	550	556	EIHNIDD	855.384	5.21863	TTd-TT010	0	0	0
sps	550	556	EIHNIDD	855.384	5.21732	TTd-TT010	10	1.20669	0.032064
sps	550	556	EIHNIDD	855.384	5.21089	TTd-TT010	30	1.44624	0.194054	2.65293	-0.156217	0.582162
sps	557	563	NTIYQYL	914.462	7.51881	TTd	0	0	0
sps	557	563	NTIYQYL	914.462	7.51673	TTd	10	0.954865	0.034558
sps	557	563	NTIYQYL	914.462	7.50655	TTd	30	1.09689	0.043182	2.05176
sps	557	563	NTIYQYL	914.462	7.51881	TTd-TT010	0	0	0
sps	557	563	NTIYQYL	914.462	7.51415	TTd-TT010	10	0.954487	0.044857
sps	557	563	NTIYQYL	914.462	7.50632	TTd-TT010	30	1.106	0.077711	2.06048	-0.008728	0.233133
sps	573	579	QRITMTN	863.44	4.20301	TTd	0	0	0
sps	573	579	QRITMTN	863.44	4.18718	TTd	10	0.676129	0.063087
sps	573	579	QRITMTN	863.44	4.20767	TTd	30	0.782758	0.066734	1.45889
sps	573	579	QRITMTN	863.44	4.20301	TTd-TT010	0	0	0
sps	573	579	QRITMTN	863.44	4.22016	TTd-TT010	10	0.659329	0.120905
sps	573	579	QRITMTN	863.44	4.20573	TTd-TT010	30	0.792004	0.084383	1.45133	0.007554	0.362715
sps	573	582	QRITMTNSVD	1164.57	4.85679	TTd	0	0	0
sps	573	582	QRITMTNSVD	1164.57	4.85353	TTd	10	2.05	0.151812
sps	573	582	QRITMTNSVD	1164.57	4.84694	TTd	30	2.20563	0.066957	4.25563
sps	573	582	QRITMTNSVD	1164.57	4.85679	TTd-TT010	0	0	0
sps	573	582	QRITMTNSVD	1164.57	4.85847	TTd-TT010	10	2.16332	0.108113
sps	573	582	QRITMTNSVD	1164.57	4.85009	TTd-TT010	30	2.32236	0.090514	4.48568	-0.23005	0.455436
sps	573	583	QRITMTNSVDD	1279.59	4.91467	TTd	0	0	0
sps	573	583	QRITMTNSVDD	1279.59	4.91049	TTd	10	2.22532	0.13989
sps	573	583	QRITMTNSVDD	1279.59	4.90323	TTd	30	2.38731	0.074477	4.61263
sps	573	583	QRITMTNSVDD	1279.59	4.91467	TTd-TT010	0	0	0
sps	573	583	QRITMTNSVDD	1279.59	4.91608	TTd-TT010	10	2.3621	0.103272
sps	573	583	QRITMTNSVDD	1279.59	4.90813	TTd-TT010	30	2.54242	0.081508	4.90452	-0.291896	0.41967
sps	573	585	QRITMTNSVDDAL	1463.72	5.96739	TTd	0	0	0
sps	573	585	QRITMTNSVDDAL	1463.72	5.96333	TTd	10	2.30943	0.156655
sps	573	585	QRITMTNSVDDAL	1463.72	5.95786	TTd	30	2.42624	0.081208	4.73567
sps	573	585	QRITMTNSVDDAL	1463.72	5.96739	TTd-TT010	0	0	0
sps	573	585	QRITMTNSVDDAL	1463.72	5.96654	TTd-TT010	10	2.35158	0.060279
sps	573	585	QRITMTNSVDDAL	1463.72	5.95775	TTd-TT010	30	2.52915	0.119301	4.88072	-0.145053	0.469965
sps	584	592	ALINSTKIY	1022.59	5.76961	TTd	0	0	0
sps	584	592	ALINSTKIY	1022.59	5.76752	TTd	10	1.09411	0.124363
sps	584	592	ALINSTKIY	1022.59	5.76379	TTd	30	1.25871	0.110194	2.35281
sps	584	592	ALINSTKIY	1022.59	5.76961	TTd-TT010	0	0	0
sps	584	592	ALINSTKIY	1022.59	5.76951	TTd-TT010	10	1.18676	0.08069
sps	584	592	ALINSTKIY	1022.59	5.76111	TTd-TT010	30	1.26418	0.153102	2.45094	-0.098121	0.459306
sps	586	595	INSTKIYSYF	1235.63	6.71837	TTd	0	0	0
sps	586	595	INSTKIYSYF	1235.63	6.722	TTd	10	0.770886	0.068215
sps	586	595	INSTKIYSYF	1235.63	6.7102	TTd	30	0.789367	0.015654	1.56025
sps	586	595	INSTKIYSYF	1235.63	6.71837	TTd-TT010	0	0	0
sps	586	595	INSTKIYSYF	1235.63	6.72051	TTd-TT010	10	0.700801	0.063121
sps	586	595	INSTKIYSYF	1235.63	6.7117	TTd-TT010	30	0.777622	0.047383	1.47842	0.08183	0.204645
sps	592	598	YSYFPSV	862.398	7.33013	TTd	0	0	0
sps	592	598	YSYFPSV	862.398	7.33215	TTd	10	0.639256	0.037801
sps	592	598	YSYFPSV	862.398	7.32362	TTd	30	0.655506	0.056276	1.29476
sps	592	598	YSYFPSV	862.398	7.33013	TTd-TT010	0	0	0
sps	592	598	YSYFPSV	862.398	7.33148	TTd-TT010	10	0.639913	0.035576
sps	592	598	YSYFPSV	862.398	7.32351	TTd-TT010	30	0.654481	0.045302	1.29439	0.000368	0.168828
sps	593	601	SYFPSVISK	1027.55	6.01734	TTd	0	0	0
sps	593	601	SYFPSVISK	1027.55	6.01481	TTd	10	1.03076	0.281582
sps	593	601	SYFPSVISK	1027.55	6.00991	TTd	30	1.42384	0.08661	2.4546
sps	593	601	SYFPSVISK	1027.55	6.01734	TTd-TT010	0	0	0
sps	593	601	SYFPSVISK	1027.55	6.01818	TTd-TT010	10	1.18888	0.112074
sps	593	601	SYFPSVISK	1027.55	6.01095	TTd-TT010	30	1.50053	0.125979	2.68941	-0.234805	0.844746
sps	593	611	SYFPSVISKVNQGAQGILF	2055.09	7.60411	TTd	0	0	0
sps	593	611	SYFPSVISKVNQGAQGILF	2055.09	7.60034	TTd	10	6.06301	0.356853
sps	593	611	SYFPSVISKVNQGAQGILF	2055.09	7.58833	TTd	30	6.64504	0.095719	12.7081
sps	593	611	SYFPSVISKVNQGAQGILF	2055.09	7.60411	TTd-TT010	0	0	0
sps	593	611	SYFPSVISKVNQGAQGILF	2055.09	7.59448	TTd-TT010	10	6.41303	0.086358
sps	593	611	SYFPSVISKVNQGAQGILF	2055.09	7.58618	TTd-TT010	30	6.88536	0.161267	13.2984	-0.590339	1.07056
sps	596	611	PSVISKVNQGAQGILF	1657.93	6.84347	TTd	0	0	0
sps	596	611	PSVISKVNQGAQGILF	1657.93	6.83441	TTd	10	6.03918	0.329026
sps	596	611	PSVISKVNQGAQGILF	1657.93	6.82148	TTd	30	6.47711	0.094773	12.5163
sps	596	611	PSVISKVNQGAQGILF	1657.93	6.84347	TTd-TT010	0	0	0
sps	596	611	PSVISKVNQGAQGILF	1657.93	6.83099	TTd-TT010	10	6.24206	0.041225
sps	596	611	PSVISKVNQGAQGILF	1657.93	6.82062	TTd-TT010	30	6.72468	0.121725	12.9667	-0.450438	0.987078
sps	599	612	ISKVNQGAQGILFL	1487.86	7.19101	TTd	0	0	0
sps	599	612	ISKVNQGAQGILFL	1487.86	7.1937	TTd	10	5.52456	0.288073
sps	599	612	ISKVNQGAQGILFL	1487.86	7.18221	TTd	30	5.77173	0.059201	11.2963
sps	599	612	ISKVNQGAQGILFL	1487.86	7.19101	TTd-TT010	0	0	0
sps	599	612	ISKVNQGAQGILFL	1487.86	7.19402	TTd-TT010	10	5.60637	0.119268
sps	599	612	ISKVNQGAQGILFL	1487.86	7.1829	TTd-TT010	30	5.94366	0.12205	11.55	-0.253743	0.864219
sps	600	612	SKVNQGAQGILFL	1374.77	6.44445	TTd	0	0	0
sps	600	612	SKVNQGAQGILFL	1374.77	6.43869	TTd	10	4.69632	0.131616
sps	600	612	SKVNQGAQGILFL	1374.77	6.42818	TTd	30	4.84398	0.114122	9.54029
sps	600	612	SKVNQGAQGILFL	1374.77	6.44445	TTd-TT010	0	0	0
sps	600	612	SKVNQGAQGILFL	1374.77	6.43835	TTd-TT010	10	4.71485	0.130868
sps	600	612	SKVNQGAQGILFL	1374.77	6.42864	TTd-TT010	30	4.85459	0.125265	9.56944	-0.029148	0.394848
sps	601	611	KVNQGAQGILF	1174.66	6.36685	TTd	0	0	0
sps	601	611	KVNQGAQGILF	1174.66	6.36229	TTd	10	4.51592	0.073991
sps	601	611	KVNQGAQGILF	1174.66	6.35325	TTd	30	4.52267	0.057446	9.03859
sps	601	611	KVNQGAQGILF	1174.66	6.36685	TTd-TT010	0	0	0
sps	601	611	KVNQGAQGILF	1174.66	6.36421	TTd-TT010	10	4.55634	0.058719
sps	601	611	KVNQGAQGILF	1174.66	6.35501	TTd-TT010	30	4.50431	0.0662	9.06066	-0.022071	0.221973
sps	604	611	QGAQGILF	833.452	7.40587	TTd	0	0	0
sps	604	611	QGAQGILF	833.452	7.40454	TTd	10	3.21317	0.031955
sps	604	611	QGAQGILF	833.452	7.3958	TTd	30	3.16371	0.040719	6.37688
sps	604	611	QGAQGILF	833.452	7.40587	TTd-TT010	0	0	0
sps	604	611	QGAQGILF	833.452	7.40399	TTd-TT010	10	3.14553	0.044509
sps	604	611	QGAQGILF	833.452	7.39615	TTd-TT010	30	3.18504	0.077613	6.33056	0.046313	0.232839
sps	609	621	ILFLQWVRDIIDD	1645.89	5.4049	TTd	0	0	0
sps	609	621	ILFLQWVRDIIDD	1645.89	5.38458	TTd	10	6.32896	0.10389
sps	609	621	ILFLQWVRDIIDD	1645.89	5.37786	TTd	30	6.38201	0.172645	12.711
sps	609	621	ILFLQWVRDIIDD	1645.89	5.4049	TTd-TT010	0	0	0
sps	609	621	ILFLQWVRDIIDD	1645.89	5.38622	TTd-TT010	10	6.20378	0.095822
sps	609	621	ILFLQWVRDIIDD	1645.89	5.37881	TTd-TT010	30	6.36401	0.170393	12.5678	0.143184	0.517935
sps	611	617	FLQWVRD	963.505	6.42363	TTd	0	0	0
sps	611	617	FLQWVRD	963.505	6.42098	TTd	10	0.400872	0.121375
sps	611	617	FLQWVRD	963.505	6.4107	TTd	30	0.556766	0.073816	0.957638
sps	611	617	FLQWVRD	963.505	6.42371	TTd-TT010	0	0	0
sps	611	617	FLQWVRD	963.505	6.41857	TTd-TT010	10	0.525036	0.067789
sps	611	617	FLQWVRD	963.505	6.41231	TTd-TT010	30	0.584461	0.042119	1.1095	-0.151859	0.364125
sps	612	621	LQWVRDIIDD	1272.66	7.03958	TTd	0	0	0
sps	612	621	LQWVRDIIDD	1272.66	7.04268	TTd	10	0.116261	0.056093
sps	612	621	LQWVRDIIDD	1272.66	7.03446	TTd	30	0.094773	0.020143	0.211034
sps	612	621	LQWVRDIIDD	1272.66	7.03958	TTd-TT010	0	0	0
sps	612	621	LQWVRDIIDD	1272.66	7.0419	TTd-TT010	10	0.0633	0.030011
sps	612	621	LQWVRDIIDD	1272.66	7.03761	TTd-TT010	30	0.040627	0.011804	0.103927	0.107107	0.168279
sps	613	621	QWVRDIIDD	1159.57	6.43365	TTd	0	0	0
sps	613	621	QWVRDIIDD	1159.57	6.4303	TTd	10	0.130163	0.01301
sps	613	621	QWVRDIIDD	1159.57	6.42122	TTd	30	0.130282	0.053936	0.260445
sps	613	621	QWVRDIIDD	1159.57	6.43365	TTd-TT010	0	0	0
sps	613	621	QWVRDIIDD	1159.57	6.42788	TTd-TT010	10	0.053734	0.017388
sps	613	621	QWVRDIIDD	1159.57	6.41892	TTd-TT010	30	0.107772	0.011665	0.161506	0.098939	0.161808
[truncated: 510 more rows]

## Sheet: FHA-1-9 Difference
Filamentous Hemagglutinin bound to mAb 1-9
[truncated: 2,225 more rows]

## Sheet: FHA 32-1 Difference
Filamentous Hemagglutinin bound to mAb 32-1
[truncated: 2,377 more rows]
