# Supplementary material
Source: Royal Society of Chemistry journal article supplement (doi:10.1039/d6an00215c)
Supplement: d6an00215c2.pdf [file d6an00215c2.pdf]

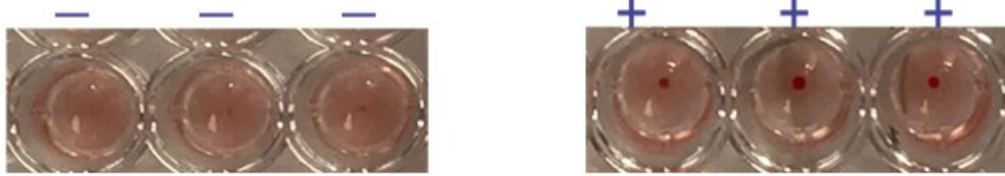

Supplementary Table 1. Results from hemagglutination inhibition assay. FHA protein was incubated in serially diluted mAbs. Strongest to weakest hemagglutination inhibition is denoted as: +>±>-
